# Supplementary material for: Functional Divergence in the Genus Oenococcus as Predicted by Genome Sequencing of the Newly-Described Species, Oenococcus kitaharae
Source: PLoS One. 2012 Jan 3;7(1):e29626. doi: 10.1371/journal.pone.0029626 (PMC3250461; doi:10.1371/journal.pone.0029626)
Supplement: Table S1 — Oenococcus kitaharae genome annotation. O. kitaharae ORFs as predicted by Glimmer [7] are matched against an automated annotation and functional prediction performed using RAST [8]. Comparative analysis of each ORF was also performed using BLASTp comparisons against O. oeni PSU1 [33] with the comparisons parameters listed for each O. kitaharae ORF and its closest O. oeni PSU1 match (if present). (XLS) [file pone.0029626.s003.xls]

## Sheet: Sheet1
									O. oeni strain PSU-1 BLAST results
Genbank_systematic	Glimmer_systematic	RAST_ID	RAST_FUNCTION	Additional_function	Process	gene_left	gene_right	length	PSU1_GenbankID	PSU1_annotation	%identity	alignment_length	mismatches	gapopenings	qstart:qend	sstart:send	e-value	bitscore
OKIT_0001	orf00002_AWRIB616_contig1_group1_2005_-1_len=2007	#N/A	#N/A	serine-rich repeat protein		2005	-1	2007	No_hit
OKIT_0002	orf00003_AWRIB616_contig1_group1_2860_2693_len=168	fig|336988.4.peg.3	hypothetical protein			2860	2693	168	No_hit
OKIT_0003	orf00004_AWRIB616_contig1_group1_3331_3642_len=312	fig|336988.4.peg.4	PTS system2C cellobiose-specific IIB component (EC 2.7.1.69);Ontology_term=KEGG_ENZYME:2.7.1.69			3331	3642	312	YP_809977.1	cellobiose-specific PTS system IIB component	69.00	100	30	1	1:297	1:100	2e-34	136
OKIT_0004	orf00005_AWRIB616_contig1_group1_3639_3983_len=345	fig|336988.4.peg.5	PTS system2C cellobiose-specific IIA component (EC 2.7.1.69);Ontology_term=KEGG_ENZYME:2.7.1.69			3639	3983	345	YP_809978.1	cellobiose-specific PTS system IIA component	68.87	106	33	0	22:339	4:109	4e-38	148
OKIT_0005	orf00006_AWRIB616_contig1_group1_4041_5495_len=1455	fig|336988.4.peg.6	6-phospho-beta-glucosidase (EC 3.2.1.86);Ontology_term=KEGG_ENZYME:3.2.1.86			4041	5495	1455	YP_809980.1	Beta-glucosidase/6-phospho-beta-	64.15	477	162	5	13:1425	11:484	0.0	641
OKIT_0006	orf00007_AWRIB616_contig1_group1_5547_6284_len=738	fig|336988.4.peg.7	Transcriptional regulator			5547	6284	738	No_hit
OKIT_0007	orf00008_AWRIB616_contig1_group1_7191_6277_len=915	fig|336988.4.peg.8	Sugar kinase and transcription regulator (EC 2.7.1.-);Ontology_term=KEGG_ENZYME:2.7.1.-			7191	6277	915	No_hit
OKIT_0008	orf00009_AWRIB616_contig1_group1_7392_7598_len=207	fig|336988.4.peg.9	hypothetical protein			7392	7598	207	No_hit
OKIT_0009	orf00011_AWRIB616_contig1_group1_8838_7813_len=1026	fig|336988.4.peg.10	Exopolysaccharide biosynthesis protein			8838	7813	1026	YP_809739.1	exopolysaccharide biosynthesis protein	76.61	342	79	1	1:1023	1:342	3e-159	553
OKIT_0010	orf00012_AWRIB616_contig1_group1_10222_8831_len=1392	fig|336988.4.peg.11	D-xylose proton-symporter			10222	8831	1392	YP_811272.1	D-xylose proton-symporter	70.18	456	136	0	7:1374	5:460	0.0	657
OKIT_0011	orf00013_AWRIB616_contig1_group1_11865_10456_len=1410	fig|336988.4.peg.12	hypothetical protein			11865	10456	1410	No_hit
OKIT_0012	orf00014_AWRIB616_contig1_group1_13208_12045_len=1164	fig|336988.4.peg.13	Sortase A2C LPXTG specific			13208	12045	1164	No_hit
OKIT_0013	orf00015_AWRIB616_contig1_group1_14089_13205_len=885	fig|336988.4.peg.14	Sortase A2C LPXTG specific			14089	13205	885	No_hit
OKIT_0014	orf00016_AWRIB616_contig1_group1_15687_14167_len=1521	fig|336988.4.peg.15	Cell wall surface anchor family protein			15687	14167	1521	No_hit
OKIT_0015	orf00017_AWRIB616_contig1_group1_16847_15684_len=1164	fig|336988.4.peg.16	hypothetical protein			16847	15684	1164	No_hit
OKIT_0016	orf00018_AWRIB616_contig1_group1_19513_16844_len=2670	fig|336988.4.peg.17	Cell wall surface anchor family protein2C FPXTG motif			19513	16844	2670	No_hit
OKIT_0017	orf00019_AWRIB616_contig1_group1_19974_21050_len=1077	fig|336988.4.peg.18	Hypothetical similar to thiamin biosynthesis lipoprotein ApbE			19974	21050	1077	YP_811118.1	thiamine biosynthesis membrane-associated	80.45	358	70	0	1:1074	1:358	2e-173	600
OKIT_0018	orf00020_AWRIB616_contig1_group1_21666_21058_len=609	fig|336988.4.peg.19	SAM-dependent methyltransferase			21666	21058	609	YP_810645.1	SAM-dependent methyltransferase	61.19	201	78	0	4:606	1:201	5e-71	259
OKIT_0019	orf00022_AWRIB616_contig1_group1_21910_23778_len=1869	fig|336988.4.peg.20	NADH dehydrogenase (EC 1.6.99.3) in cluster with putative pheromone precursor;Ontology_term=KEGG_ENZYME:1.6.99.3			21910	23778	1869	YP_811338.1	NADH dehydrogenase, FAD-containing subunit	30.51	390	255	9	16:1176	4:380	4e-42	165
OKIT_0020	orf00023_AWRIB616_contig1_group1_23794_24237_len=444	fig|336988.4.peg.21	FIG00886273: hypothetical protein			23794	24237	444	YP_810649.1	hypothetical protein	74.45	137	35	0	31:441	8:144	5e-58	215
OKIT_0021	orf00024_AWRIB616_contig1_group1_24234_24791_len=558	fig|336988.4.peg.22	Heptaprenyl diphosphate synthase component I (EC 2.5.1.30);Ontology_term=KEGG_ENZYME:2.5.1.30			24234	24791	558	YP_810650.1	hypothetical protein	86.03	179	25	0	13:549	5:183	2e-86	310
OKIT_0022	orf00027_AWRIB616_contig1_group1_24797_25774_len=978	fig|336988.4.peg.23	Heptaprenyl diphosphate synthase component II (EC 2.5.1.30);Ontology_term=KEGG_ENZYME:2.5.1.30			24797	25774	978	YP_810651.1	geranylgeranyl pyrophosphate synthase	73.54	325	86	0	1:975	1:325	2e-138	483
OKIT_0023	orf00029_AWRIB616_contig1_group1_25776_26609_len=834	fig|336988.4.peg.24	ATPase component of general energizing module of ECF transporters			25776	26609	834	YP_810652.1	ABC-type cobalt transport system, ATPase	67.27	275	90	0	1:825	1:275	2e-107	380
OKIT_0024	orf00030_AWRIB616_contig1_group1_26585_27451_len=867	fig|336988.4.peg.25	ATPase component of general energizing module of ECF transporters			26585	27451	867	YP_810653.1	ABC-type cobalt transport system, ATPase	60.29	277	110	0	1:831	1:277	5e-95	339
OKIT_0025	orf00031_AWRIB616_contig1_group1_27448_28251_len=804	fig|336988.4.peg.26	Transmembrane component of general energizing module of ECF transporters			27448	28251	804	YP_810654.1	ABC-type cobalt transport system, permease	73.86	264	69	0	1:792	1:264	5e-112	395
OKIT_0026	orf00032_AWRIB616_contig1_group1_29205_28237_len=969	fig|336988.4.peg.27	Putative prenyltransferase2C contains 12C4-dihydroxy-2-naphthoate octaprenyltransferase domain			29205	28237	969	YP_811334.1	1,4-dihydroxy-2-naphthoate	32.58	310	193	2	40:960	5:301	2e-43	168
OKIT_0027	orf00033_AWRIB616_contig1_group1_30225_29314_len=912	fig|336988.4.peg.28	Putative pheromone precursor lipoprotein			30225	29314	912	YP_810655.1	RNA_RNaseP_classB	69.54	174	50	1	4:516	1:174	4e-63	233
OKIT_0028	orf00034_AWRIB616_contig1_group1_30450_31205_len=756	fig|336988.4.peg.29	Predicted transcriptional regulator			30450	31205	756	YP_811326.1	MerR family transcriptional regulator	44.21	233	127	2	61:750	24:256	2e-52	197
OKIT_0029	orf00035_AWRIB616_contig1_group1_31534_31235_len=300	fig|336988.4.peg.30	hypothetical protein			31534	31235	300	No_hit
OKIT_0030	orf00036_AWRIB616_contig1_group1_31730_33358_len=1629	fig|336988.4.peg.31	Gamma-glutamyltranspeptidase (EC 2.3.2.2);Ontology_term=KEGG_ENZYME:2.3.2.2			31730	33358	1629	No_hit
OKIT_0031	orf00039_AWRIB616_contig1_group1_34851_33391_len=1461	fig|336988.4.peg.32	Beta-glucosidase (EC 3.2.1.21)%3B 6-phospho-beta-glucosidase (EC 3.2.1.86);Ontology_term=KEGG_ENZYME:3.2.1.21,KEGG_ENZYME:3.2.1.86			34851	33391	1461	YP_809980.1	Beta-glucosidase/6-phospho-beta-	51.02	492	213	8	25:1458	8:485	4e-142	496
OKIT_0032	orf00040_AWRIB616_contig1_group1_34986_35501_len=516	fig|336988.4.peg.33	Flavodoxin			34986	35501	516	No_hit
OKIT_0033	orf00041_AWRIB616_contig1_group1_39147_35566_len=3582	fig|336988.4.peg.34	hypothetical protein	levansucrase		39147	35566	3582	YP_809860.1	Lyzozyme M1 (1,4-beta-N-acetylmuramidase)	34.45	479	276	15	2155:3579	16:460	4e-55	209
OKIT_0034	orf00042_AWRIB616_contig1_group1_39813_39418_len=396	fig|336988.4.peg.35	hypothetical phage protein			39813	39418	396	No_hit
OKIT_0035	orf00043_AWRIB616_contig1_group1_39977_39813_len=165	fig|336988.4.peg.36	hypothetical protein			39977	39813	165	No_hit
OKIT_0036	orf00044_AWRIB616_contig1_group1_40181_40792_len=612	fig|336988.4.peg.37	hypothetical protein			40181	40792	612	No_hit
OKIT_0037	orf00045_AWRIB616_contig1_group1_42011_40818_len=1194	fig|336988.4.peg.38	hypothetical protein			42011	40818	1194	No_hit
OKIT_0038	orf00046_AWRIB616_contig1_group1_43414_42164_len=1251	fig|336988.4.peg.39	hypothetical protein			43414	42164	1251	No_hit
OKIT_0039	orf00048_AWRIB616_contig1_group1_43718_43566_len=153	fig|336988.4.peg.40	hypothetical protein			43718	43566	153	No_hit
OKIT_0040	orf00049_AWRIB616_contig1_group1_45315_43831_len=1485	fig|336988.4.peg.41	hypothetical protein	glycosyl transferase family 2		45315	43831	1485	No_hit
OKIT_0041	orf00050_AWRIB616_contig1_group1_45421_45585_len=165	fig|336988.4.peg.42	hypothetical protein			45421	45585	165	No_hit
OKIT_0042	orf00051_AWRIB616_contig1_group1_46806_45742_len=1065	fig|336988.4.peg.43	cell surface protein			46806	45742	1065	No_hit
OKIT_0043	orf00052_AWRIB616_contig1_group1_47478_46858_len=621	fig|336988.4.peg.44	hypothetical protein	cell surface protein		47478	46858	621	No_hit
OKIT_0044	orf00053_AWRIB616_contig1_group1_47870_47481_len=390	fig|336988.4.peg.45	hypothetical protein			47870	47481	390	No_hit
OKIT_0045	orf00054_AWRIB616_contig1_group1_49330_47873_len=1458	fig|336988.4.peg.46	hypothetical protein			49330	47873	1458	YP_811035.1	hypothetical protein	27.62	315	210	11	115:1029	70:376	1e-24	106
OKIT_0046	orf00055_AWRIB616_contig1_group1_49951_49655_len=297	fig|336988.4.peg.47	hypothetical protein			49951	49655	297	YP_809824.1	hypothetical protein	56.12	98	39	1	1:282	13:110	5e-30	121
OKIT_0047	orf00056_AWRIB616_contig1_group1_50920_50666_len=255	fig|336988.4.peg.49	YoeB toxin protein	addiction module toxin, Txe/YoeB family	Toxin	50920	50666	255	No_hit
OKIT_0048	orf00058_AWRIB616_contig1_group1_51200_50910_len=291	fig|336988.4.peg.50	DNA-damage-inducible protein J2C RelB antitoxin			51200	50910	291	No_hit
OKIT_0049	orf00059_AWRIB616_contig1_group1_52001_51405_len=597	fig|336988.4.peg.51	hypothetical protein			52001	51405	597	No_hit
OKIT_0050	orf00060_AWRIB616_contig1_group1_53120_52353_len=768	fig|336988.4.peg.52	hypothetical protein			53120	52353	768	No_hit
OKIT_0051	orf00061_AWRIB616_contig1_group1_54438_53641_len=798	fig|336988.4.peg.54	hypothetical protein			54438	53641	798	No_hit
OKIT_0052	orf00062_AWRIB616_contig1_group1_54912_54640_len=273	fig|336988.4.peg.55	hypothetical protein			54912	54640	273	No_hit
OKIT_0053	orf00063_AWRIB616_contig1_group1_55475_55107_len=369	fig|336988.4.peg.56	hypothetical protein			55475	55107	369	No_hit
OKIT_0054	orf00064_AWRIB616_contig1_group1_55603_55833_len=231	#N/A	#N/A	hypothetical protein		55603	55833	231	No_hit
OKIT_0055	orf00066_AWRIB616_contig1_group1_56906_55950_len=957	fig|336988.4.peg.58	hypothetical protein			56906	55950	957	No_hit
OKIT_0056	orf00067_AWRIB616_contig1_group1_57048_57548_len=501	fig|336988.4.peg.59	Hypothetical protein SAV1803	tryptophan synthase subunit beta [Streptococcus pneumoniae SP18-BS74]		57048	57548	501	No_hit
OKIT_0057	orf00068_AWRIB616_contig1_group1_59577_58051_len=1527	fig|336988.4.peg.60	Putative inner membrane protein			59577	58051	1527	No_hit
OKIT_0058	orf00069_AWRIB616_contig1_group1_61186_59657_len=1530	fig|336988.4.peg.61	repeat unit transporter	oligosaccharide translocase		61186	59657	1530	No_hit
OKIT_0059	orf00071_AWRIB616_contig1_group1_62128_61697_len=432	fig|336988.4.peg.62	Glycosyltransferase			62128	61697	432	No_hit
OKIT_0060	orf00072_AWRIB616_contig1_group1_62848_62252_len=597	fig|336988.4.peg.63	hypothetical protein			62848	62252	597	No_hit
OKIT_0061	orf00073_AWRIB616_contig1_group1_64211_63252_len=960	fig|336988.4.peg.64	Glycosyltransferase			64211	63252	960	No_hit
OKIT_0062	orf00074_AWRIB616_contig1_group1_65599_64385_len=1215	fig|336988.4.peg.65	hypothetical protein	glycosyl transferase		65599	64385	1215	No_hit
OKIT_0063	orf00075_AWRIB616_contig1_group1_66575_65661_len=915	fig|336988.4.peg.66	Putative polyribitolphosphotransferase			66575	65661	915	No_hit
OKIT_0064	orf00076_AWRIB616_contig1_group1_67858_66644_len=1215	fig|336988.4.peg.67	oligosaccharide repeat unit polymerase Wzy			67858	66644	1215	No_hit
OKIT_0065	orf00078_AWRIB616_contig1_group1_68975_67848_len=1128	fig|336988.4.peg.68	glycosyl transferase group 1			68975	67848	1128	No_hit
OKIT_0066	orf00080_AWRIB616_contig1_group1_69827_68976_len=852	fig|336988.4.peg.69	putative glycosyl transferase			69827	68976	852	No_hit
OKIT_0067	orf00081_AWRIB616_contig1_group1_71061_69874_len=1188	fig|336988.4.peg.70	Alpha-D-GlcNAc alpha-12C2-L-rhamnosyltransferase (EC 2.4.1.-);Ontology_term=KEGG_ENZYME:2.4.1.-			71061	69874	1188	YP_811027.1	glycosyltransferase	83.80	395	63	1	1:1182	1:395	0.0	691
OKIT_0068	orf00082_AWRIB616_contig1_group1_71733_71062_len=672	fig|336988.4.peg.71	Undecaprenyl-phosphate galactosephosphotransferase (EC 2.7.8.6);Ontology_term=KEGG_ENZYME:2.7.8.6			71733	71062	672	YP_811028.1	lipopolysaccharide synthesis sugar transferase	60.65	216	85	0	22:669	22:237	1e-75	275
OKIT_0069	orf00083_AWRIB616_contig1_group1_73498_71756_len=1743	fig|336988.4.peg.72	Manganese-dependent protein-tyrosine phosphatase (EC 3.1.3.48);Ontology_term=KEGG_ENZYME:3.1.3.48			73498	71756	1743	YP_811029.1	tyrosine-protein kinase	51.86	592	266	3	1:1740	1:585	3e-173	600
OKIT_0070	orf00084_AWRIB616_contig1_group1_74199_73498_len=702	fig|336988.4.peg.73	Tyrosine-protein kinase transmembrane modulator EpsC			74199	73498	702	YP_811030.1	capsular polysaccharide biosynthesis protein	62.77	231	86	0	1:693	1:231	2e-81	294
OKIT_0071	orf00085_AWRIB616_contig1_group1_74525_75646_len=1122	fig|336988.4.peg.74	AraC-like transcriptional regulator (HTH domain)			74525	75646	1122	YP_811031.1	AraC family transcriptional regulator	46.77	372	193	2	1:1107	1:370	5e-99	353
OKIT_0072	orf00086_AWRIB616_contig1_group1_75709_76821_len=1113	fig|336988.4.peg.75	hypothetical protein			75709	76821	1113	No_hit
OKIT_0073	orf00087_AWRIB616_contig1_group1_76818_78026_len=1209	fig|336988.4.peg.76	hypothetical protein			76818	78026	1209	No_hit
OKIT_0074	orf00088_AWRIB616_contig1_group1_78023_78925_len=903	fig|336988.4.peg.77	Nitrous oxide reductase maturation protein NosF (ATPase)			78023	78925	903	YP_811309.1	ABC-type multidrug transport system, ATPase	34.72	216	130	5	1:645	8:213	5e-33	133
OKIT_0075	orf00090_AWRIB616_contig1_group1_79822_78926_len=897	fig|336988.4.peg.78	Beta-lactamase class A			79822	78926	897	YP_811042.1	Beta-lactamase class A	47.90	286	146	2	46:894	8:293	5e-74	270
OKIT_0076	orf00091_AWRIB616_contig1_group1_80730_79849_len=882	fig|336988.4.peg.79	DegV family protein			80730	79849	882	YP_811043.1	hypothetical protein	74.91	291	73	0	1:873	1:291	5e-131	459
OKIT_0077	orf00092_AWRIB616_contig1_group1_81619_80732_len=888	fig|336988.4.peg.80	hypothetical protein			81619	80732	888	YP_811044.1	hypothetical protein	66.89	296	96	2	1:885	1:295	2e-115	407
OKIT_0078	orf00093_AWRIB616_contig1_group1_82702_81800_len=903	fig|336988.4.peg.81	6-phosphogluconate dehydrogenase2C decarboxylating (EC 1.1.1.44);Ontology_term=KEGG_ENZYME:1.1.1.44			82702	81800	903	YP_811045.1	6-phosphogluconate dehydrogenase-like protein	87.92	298	36	0	1:894	1:298	8e-157	545
OKIT_0079	orf00094_AWRIB616_contig1_group1_82797_83645_len=849	fig|336988.4.peg.82	Transcriptional regulator			82797	83645	849	YP_811046.1	transcriptional regulator	86.52	282	38	0	1:846	1:282	7e-138	481
OKIT_0080	orf00095_AWRIB616_contig1_group1_83718_84692_len=975	fig|336988.4.peg.83	FIG00742523: hypothetical protein			83718	84692	975	YP_809717.1	dehydrogenase or related protein	32.06	287	184	4	16:873	3:279	5e-32	130
OKIT_0081	orf00097_AWRIB616_contig1_group1_85093_84734_len=360	fig|336988.4.peg.84	hypothetical protein			85093	84734	360	YP_811048.1	hypothetical protein	48.67	113	51	2	16:333	4:116	3e-26	109
OKIT_0082	orf00098_AWRIB616_contig1_group1_86065_85142_len=924	fig|336988.4.peg.85	FIG00885849: hypothetical protein			86065	85142	924	YP_811049.1	alpha/beta fold family hydrolase	70.36	307	91	0	1:921	1:307	6e-135	472
OKIT_0083	orf00099_AWRIB616_contig1_group1_86932_86084_len=849	fig|336988.4.peg.86	membrane protein			86932	86084	849	No_hit
OKIT_0084	orf00100_AWRIB616_contig1_group1_87011_87439_len=429	fig|336988.4.peg.87	Transcriptional regulator2C xre family			87011	87439	429	YP_811052.1	XRE family transcriptional regulator	89.05	137	15	0	16:426	1:137	6e-71	258
OKIT_0085	orf00101_AWRIB616_contig1_group1_87429_88226_len=798	fig|336988.4.peg.88	FIG00885749: hypothetical protein			87429	88226	798	YP_811053.1	SAM-dependent methyltransferase	74.34	265	68	0	1:795	1:265	2e-118	417
OKIT_0086	orf00102_AWRIB616_contig1_group1_89079_88213_len=867	fig|336988.4.peg.89	Fructosamine-3-kinase (EC 2.7.1.-);Ontology_term=KEGG_ENZYME:2.7.1.-			89079	88213	867	YP_811054.1	fructosamine-3-kinase	74.65	288	73	0	1:864	1:288	1e-130	457
OKIT_0087	orf00103_AWRIB616_contig1_group1_90588_89350_len=1239	fig|336988.4.peg.90	FIG00885723: hypothetical protein			90588	89350	1239	YP_811055.1	ABC-type Na+ efflux pump, permease component	57.28	412	174	1	1:1230	1:412	3e-143	500
OKIT_0088	orf00105_AWRIB616_contig1_group1_91510_90581_len=930	fig|336988.4.peg.91	ABC transporter2C ATP-binding protein			91510	90581	930	YP_811056.1	ABC-type uncharacterized transport system,	81.23	309	58	0	1:927	1:309	1e-147	514
OKIT_0089	orf00106_AWRIB616_contig1_group1_92105_91593_len=513	fig|336988.4.peg.92	FIG00885724: hypothetical protein			92105	91593	513	YP_811057.1	hypothetical protein	66.67	153	51	0	10:468	1:153	8e-53	198
OKIT_0090	orf00107_AWRIB616_contig1_group1_92132_93592_len=1461	fig|336988.4.peg.93	FIG00885588: hypothetical protein			92132	93592	1461	YP_811058.1	major facilitator superfamily permease	80.57	458	89	0	85:1458	1:458	0.0	742
OKIT_0091	orf00108_AWRIB616_contig1_group1_93625_94302_len=678	fig|336988.4.peg.94	FIG00885978: hypothetical protein			93625	94302	678	YP_811059.1	hypothetical protein	84.44	225	35	0	1:675	1:225	1e-111	394
OKIT_0092	orf00110_AWRIB616_contig1_group1_94901_94359_len=543	fig|336988.4.peg.96	Peptide methionine sulfoxide reductase MsrA (EC 1.8.4.11);Ontology_term=KEGG_ENZYME:1.8.4.11			94901	94359	543	YP_811060.1	peptide methionine sulfoxide reductase	79.44	180	37	0	1:540	1:180	9e-87	311
OKIT_0093	orf00111_AWRIB616_contig1_group1_95745_94912_len=834	fig|336988.4.peg.97	Transmembrane component MtsC of energizing module of methionine-regulated ECF transporter			95745	94912	834	YP_811061.1	ABC-type cobalt transport system, permease	80.66	274	53	0	7:828	3:276	3e-124	436
OKIT_0094	orf00112_AWRIB616_contig1_group1_97429_95738_len=1692	fig|336988.4.peg.98	Duplicated ATPase component MtsB of energizing module of methionine-regulated ECF transporter			97429	95738	1692	YP_811062.1	ABC-type cobalt transport system, ATPase	71.38	559	160	0	1:1677	1:559	0.0	789
OKIT_0095	orf00113_AWRIB616_contig1_group1_97999_97433_len=567	fig|336988.4.peg.99	Substrate-specific component MtsA of methionine-regulated ECF transporter			97999	97433	567	No_hit
OKIT_0096	orf00116_AWRIB616_contig1_group1_99391_98102_len=1290	fig|336988.4.peg.100	N-acetylglucosamine-1-phosphate uridyltransferase (EC 2.7.7.23) / Glucosamine-1-phosphate N-acetyltransferase (EC 2.3.1.157);Ontology_term=KEGG_ENZYME:2.7.7.23,KEGG_ENZYME:2.3.1.157			99391	98102	1290	YP_811063.1	glucosamine-1-phosphate N-acetyltransferase	74.65	426	108	0	1:1278	1:426	0.0	659
OKIT_0097	orf00117_AWRIB616_contig1_group1_100232_99378_len=855	fig|336988.4.peg.101	PurR: transcription regulator associated with purine metabolism			100232	99378	855	YP_811064.1	purine operon repressor	92.61	284	21	0	1:852	1:284	2e-149	520
OKIT_0098	orf00118_AWRIB616_contig1_group1_100336_101715_len=1380	fig|336988.4.peg.102	Aspartokinase (EC 2.7.2.4);Ontology_term=KEGG_ENZYME:2.7.2.4			100336	101715	1380	YP_811065.1	aspartate kinase	75.55	458	112	0	1:1374	1:458	0.0	695
OKIT_0099	orf00120_AWRIB616_contig1_group1_103175_101712_len=1464	fig|336988.4.peg.103	Threonine synthase (EC 4.2.3.1);Ontology_term=KEGG_ENZYME:4.2.3.1			103175	101712	1464	YP_811066.1	threonine synthase	67.97	487	156	0	1:1461	1:487	0.0	656
OKIT_0100	orf00121_AWRIB616_contig1_group1_103230_104531_len=1302	fig|336988.4.peg.104	Homoserine dehydrogenase (EC 1.1.1.3);Ontology_term=KEGG_ENZYME:1.1.1.3			103230	104531	1302	YP_811067.1	homoserine dehydrogenase	72.96	429	115	1	1:1287	1:428	8e-179	618
OKIT_0101	orf00122_AWRIB616_contig1_group1_104524_105417_len=894	fig|336988.4.peg.105	Homoserine kinase (EC 2.7.1.39);Ontology_term=KEGG_ENZYME:2.7.1.39			104524	105417	894	No_hit
OKIT_0102	orf00123_AWRIB616_contig1_group1_105701_105450_len=252	fig|336988.4.peg.106	Veg protein			105701	105450	252	YP_811068.1	hypothetical protein	84.52	84	12	1	1:249	1:84	4e-36	141
OKIT_0103	orf00124_AWRIB616_contig1_group1_106650_105772_len=879	fig|336988.4.peg.107	Dimethyladenosine transferase (EC 2.1.1.-);Ontology_term=KEGG_ENZYME:2.1.1.-			106650	105772	879	YP_811069.1	dimethyladenosine transferase	73.08	286	77	0	13:870	5:290	2e-117	414
OKIT_0104	orf00125_AWRIB616_contig1_group1_107203_106643_len=561	fig|336988.4.peg.108	Ribonuclease M5 (EC 3.1.26.8);Ontology_term=KEGG_ENZYME:3.1.26.8			107203	106643	561	YP_811070.1	ribonuclease M5	66.67	186	60	1	1:558	1:184	1e-67	247
OKIT_0105	orf00126_AWRIB616_contig1_group1_107988_107188_len=801	fig|336988.4.peg.109	Putative deoxyribonuclease YcfH			107988	107188	801	YP_811071.1	Mg-dependent DNase	80.75	265	51	0	1:795	9:273	4e-128	449
OKIT_0106	orf00127_AWRIB616_contig1_group1_108947_108012_len=936	fig|336988.4.peg.110	L-lactate dehydrogenase (EC 1.1.1.27);Ontology_term=KEGG_ENZYME:1.1.1.27			108947	108012	936	YP_811072.1	malate dehydrogenase (NAD)	68.95	306	94	1	7:921	4:309	1e-124	437
OKIT_0107	orf00129_AWRIB616_contig1_group1_109801_108950_len=852	fig|336988.4.peg.111	oxidoreductase of aldo/keto reductase family2C subgroup 1			109801	108950	852	YP_811073.1	aldo/keto reductase	74.91	283	71	0	1:849	1:283	3e-127	446
OKIT_0108	orf00130_AWRIB616_contig1_group1_109855_110298_len=444	fig|336988.4.peg.112	Peptide methionine sulfoxide reductase MsrB (EC 1.8.4.12);Ontology_term=KEGG_ENZYME:1.8.4.12			109855	110298	444	YP_811074.1	peptide methionine sulfoxide reductase	75.71	140	34	0	1:420	1:140	6e-62	228
OKIT_0109	orf00131_AWRIB616_contig1_group1_110528_110283_len=246	fig|336988.4.peg.113	hypothetical protein			110528	110283	246	YP_811076.1	hypothetical protein	66.22	74	25	0	22:243	1:74	5e-26	107
OKIT_0110	orf00132_AWRIB616_contig1_group1_111446_110586_len=861	fig|336988.4.peg.114	Hydrolase (HAD superfamily)			111446	110586	861	YP_811078.1	HAD superfamily hydrolase	66.55	284	94	1	1:852	1:283	2e-109	387
OKIT_0111	orf00133_AWRIB616_contig1_group1_112849_111443_len=1407	fig|336988.4.peg.115	Cysteinyl-tRNA synthetase (EC 6.1.1.16);Ontology_term=KEGG_ENZYME:6.1.1.16			112849	111443	1407	YP_811079.1	cysteinyl-tRNA synthetase	74.30	467	119	1	1:1401	1:466	0.0	705
OKIT_0112	orf00134_AWRIB616_contig1_group1_113515_113027_len=489	fig|336988.4.peg.116	Large-conductance mechanosensitive channel			113515	113027	489	No_hit
OKIT_0113	orf00135_AWRIB616_contig1_group1_114550_113606_len=945	fig|336988.4.peg.117	Malate permease			114550	113606	945	YP_811083.1	malate permease	85.03	314	47	0	1:942	1:314	1e-151	528
OKIT_0114	orf00138_AWRIB616_contig1_group1_116175_115135_len=1041,orf00136_AWRIB616_contig1_group1_115062_114550_len=513	fig|336988.4.peg.119	Malolactic enzyme (EC 1.-.-.-);Ontology_term=KEGG_ENZYME:1.-.-.-			116175	114550	1041,513	YP_811084.1,YP_811084.1		88.15,82.35	346,170	41,30	0,0	1:1038,1:510	1:346,372:541	2e-178,3e-79	616,286
OKIT_0116	orf00139_AWRIB616_contig1_group1_116259_117167_len=909	fig|336988.4.peg.120	Malolactic regulator			116259	117167	909	YP_811085.1	malolactic fermentation system transcription	61.11	288	112	0	1:864	1:288	3e-105	373
OKIT_0117	orf00140_AWRIB616_contig1_group1_117576_117169_len=408	fig|336988.4.peg.121	hypothetical protein			117576	117169	408	No_hit
OKIT_0118	orf00141_AWRIB616_contig1_group1_118193_117549_len=645	fig|336988.4.peg.122	hypothetical protein			118193	117549	645	No_hit
OKIT_0119	orf00142_AWRIB616_contig1_group1_119269_118199_len=1071	fig|336988.4.peg.123	Esterase/lipase			119269	118199	1071	No_hit
OKIT_0120	orf00143_AWRIB616_contig1_group1_119398_119763_len=366	fig|336988.4.peg.124	hypothetical protein			119398	119763	366	YP_809826.1	acylphosphatase	46.22	119	60	1	1:357	1:115	7e-25	104
OKIT_0121	orf00144_AWRIB616_contig1_group1_120653_119760_len=894	fig|336988.4.peg.125	Peptide methionine sulfoxide reductase MsrA (EC 1.8.4.11);Ontology_term=KEGG_ENZYME:1.8.4.11			120653	119760	894	YP_810123.1	peptide methionine sulfoxide reductase	63.77	276	100	0	55:882	4:279	8e-106	375
OKIT_0122	orf00145_AWRIB616_contig1_group1_120711_121628_len=918	fig|336988.4.peg.126	N-acetylmuramic acid 6-phosphate etherase (EC 4.2.-.-);Ontology_term=KEGG_ENZYME:4.2.-.-			120711	121628	918	YP_809707.1	N-acetylmuramic acid-6-phosphate etherase	44.78	297	164	0	1:891	1:297	6e-71	259
OKIT_0123	orf00146_AWRIB616_contig1_group1_121618_122637_len=1020	fig|336988.4.peg.127	Beta-lactamase class C and other penicillin binding proteins			121618	122637	1020	YP_810014.1	Beta-lactamase class C related penicillin	71.69	332	93	1	1:996	2:332	2e-142	497
OKIT_0124	orf00147_AWRIB616_contig1_group1_123092_122676_len=417	fig|336988.4.peg.128	Predicted PTS system2C galactosamine-specific IIA component (EC 2.7.1.69);Ontology_term=KEGG_ENZYME:2.7.1.69			123092	122676	417	YP_810013.1	phosphotransferase system,	70.29	138	41	0	1:414	1:138	5e-51	191
OKIT_0125	orf00148_AWRIB616_contig1_group1_123929_123111_len=819	fig|336988.4.peg.129	PTS system2C mannose-specific IID component (EC 2.7.1.69);Ontology_term=KEGG_ENZYME:2.7.1.69			123929	123111	819	YP_810012.1	phosphotransferase system,	83.82	272	44	0	1:816	1:272	2e-134	470
OKIT_0126	orf00149_AWRIB616_contig1_group1_124818_123913_len=906	fig|336988.4.peg.130	Predicted PTS system2C galactosamine-specific IIC component (EC 2.7.1.69);Ontology_term=KEGG_ENZYME:2.7.1.69			124818	123913	906	YP_810011.1	phosphotransferase system,	81.03	311	49	1	1:903	1:311	3e-142	496
OKIT_0127	orf00150_AWRIB616_contig1_group1_125329_124835_len=495	fig|336988.4.peg.131	PTS system2C mannose-specific IIB component (EC 2.7.1.69);Ontology_term=KEGG_ENZYME:2.7.1.69			125329	124835	495	YP_810010.1	phosphotransferase system,	74.23	163	42	0	1:489	1:163	3e-69	253
OKIT_0128	orf00151_AWRIB616_contig1_group1_125556_126422_len=867	fig|336988.4.peg.132	Ribonuclease BN (EC 3.1.-.-);Ontology_term=KEGG_ENZYME:3.1.-.-			125556	126422	867	YP_811093.1	ribonuclease BN-like family protein	56.49	262	114	0	43:828	16:277	3e-86	310
OKIT_0129	orf00152_AWRIB616_contig1_group1_126509_127792_len=1284	fig|336988.4.peg.133	Multiple sugar ABC transporter2C substrate-binding protein			126509	127792	1284	YP_809681.1	ABC-type sugar transport system, periplasmic	65.42	428	147	1	1:1281	1:428	4e-170	589
OKIT_0130	orf00153_AWRIB616_contig1_group1_127793_128659_len=867	fig|336988.4.peg.134	Multiple sugar ABC transporter2C membrane-spanning permease protein MsmF			127793	128659	867	YP_809683.1	ABC-type sugar transport system, permease	80.57	283	55	0	1:849	1:283	3e-135	473
OKIT_0131	orf00154_AWRIB616_contig1_group1_128649_129464_len=816	fig|336988.4.peg.135	Multiple sugar ABC transporter2C membrane-spanning permease protein MsmG			128649	129464	816	YP_809684.1	ABC-type maltose transport system, permease	67.90	271	87	0	1:813	1:271	1e-109	387
OKIT_0132	orf00155_AWRIB616_contig1_group1_130095_129469_len=627	fig|336988.4.peg.136	D-alanyl-D-alanine carboxypeptidase (EC 3.4.16.4);Ontology_term=KEGG_ENZYME:3.4.16.4			130095	129469	627	YP_810325.1	hypothetical protein	50.64	156	75	2	154:618	50:204	4e-44	169
OKIT_0133	orf00156_AWRIB616_contig1_group1_130942_130160_len=783	fig|336988.4.peg.137	Protein tyrosine/serine phosphatase			130942	130160	783	YP_811095.1	protein tyrosine/serine phosphatase	55.60	259	115	0	1:777	1:259	2e-86	311
OKIT_0134	orf00157_AWRIB616_contig1_group1_131609_130980_len=630	fig|336988.4.peg.138	Uracil phosphoribosyltransferase (EC 2.4.2.9);Ontology_term=KEGG_ENZYME:2.4.2.9			131609	130980	630	YP_811096.1	Uracil phosphoribosyltransferase	96.17	209	8	0	1:627	1:209	3e-112	395
OKIT_0135	orf00158_AWRIB616_contig1_group1_132648_131632_len=1017	fig|336988.4.peg.139	YrdC/Sua5 family protein2C required for threonylcarbamoyladenosine (t(6)A) formation in tRNA			132648	131632	1017	YP_811097.1	translation factor SUA5	72.40	337	93	0	1:1011	1:337	3e-139	486
OKIT_0136	orf00159_AWRIB616_contig1_group1_133477_132650_len=828	fig|336988.4.peg.140	Methylase of polypeptide chain release factors			133477	132650	828	YP_811098.1	methylase of polypeptide chain release factor	71.64	275	78	0	1:825	1:275	1e-114	404
OKIT_0137	orf00162_AWRIB616_contig1_group1_134565_133492_len=1074	fig|336988.4.peg.141	Peptide chain release factor 1			134565	133492	1074	YP_811099.1	peptide chain release factor 1	85.15	357	53	0	1:1071	1:357	3e-178	616
OKIT_0138	orf00163_AWRIB616_contig1_group1_135431_134661_len=771	fig|336988.4.peg.142	Acetyl-coenzyme A carboxyl transferase alpha chain (EC 6.4.1.2);Ontology_term=KEGG_ENZYME:6.4.1.2			135431	134661	771	YP_811100.1	acetyl-coenzyme A carboxylase carboxyl	76.95	256	59	0	1:768	1:256	2e-114	403
OKIT_0139	orf00164_AWRIB616_contig1_group1_136291_135428_len=864	fig|336988.4.peg.143	Acetyl-coenzyme A carboxyl transferase beta chain (EC 6.4.1.2);Ontology_term=KEGG_ENZYME:6.4.1.2			136291	135428	864	YP_811101.1	acetyl-coenzyme A carboxylase carboxyl	73.33	285	76	0	1:855	1:285	2e-123	434
OKIT_0140	orf00165_AWRIB616_contig1_group1_137670_136288_len=1383	fig|336988.4.peg.144	Biotin carboxylase of acetyl-CoA carboxylase (EC 6.3.4.14);Ontology_term=KEGG_ENZYME:6.3.4.14			137670	136288	1383	YP_811102.1	biotin carboxylase	77.29	458	104	0	1:1374	1:458	0.0	736
OKIT_0141	orf00166_AWRIB616_contig1_group1_138118_137681_len=438	fig|336988.4.peg.145	(3R)-hydroxymyristoyl-[acyl carrier protein] dehydratase (EC 4.2.1.-);Ontology_term=KEGG_ENZYME:4.2.1.-			138118	137681	438	YP_811103.1	3-hydroxyacyl-[acyl-carrier-protein]	89.58	144	15	0	1:432	1:144	1e-70	256
OKIT_0142	orf00167_AWRIB616_contig1_group1_138609_138115_len=495	fig|336988.4.peg.146	Biotin carboxyl carrier protein of acetyl-CoA carboxylase			138609	138115	495	YP_811104.1	biotin carboxyl carrier protein	63.69	168	57	2	1:492	1:168	3e-52	196
OKIT_0143	orf00168_AWRIB616_contig1_group1_139844_138612_len=1233	fig|336988.4.peg.147	3-oxoacyl-[acyl-carrier-protein] synthase2C KASII (EC 2.3.1.41);Ontology_term=KEGG_ENZYME:2.3.1.41			139844	138612	1233	YP_811105.1	3-oxoacyl-[acyl-carrier-protein] synthase II	83.66	410	67	0	1:1230	1:410	0.0	680
OKIT_0144	orf00169_AWRIB616_contig1_group1_140602_139871_len=732	fig|336988.4.peg.148	3-oxoacyl-[acyl-carrier protein] reductase (EC 1.1.1.100);Ontology_term=KEGG_ENZYME:1.1.1.100			140602	139871	732	YP_811106.1	3-oxoacyl-[acyl-carrier-protein] reductase	75.21	242	60	0	1:726	1:242	3e-103	366
OKIT_0145	orf00170_AWRIB616_contig1_group1_141507_140623_len=885	fig|336988.4.peg.149	Malonyl CoA-acyl carrier protein transacylase (EC 2.3.1.39);Ontology_term=KEGG_ENZYME:2.3.1.39			141507	140623	885	YP_811107.1	[Acyl-carrier-protein] S-malonyltransferase	63.14	293	108	0	1:879	22:314	2e-102	364
OKIT_0146	orf00171_AWRIB616_contig1_group1_142510_141551_len=960	fig|336988.4.peg.150	Enoyl-[acyl-carrier-protein] reductase [FMN] (EC 1.3.1.9);Ontology_term=KEGG_ENZYME:1.3.1.9			142510	141551	960	YP_811108.1	dioxygenase	87.34	316	40	0	10:957	3:318	6e-158	548
OKIT_0147	orf00172_AWRIB616_contig1_group1_142767_142516_len=252	fig|336988.4.peg.151	Acyl carrier protein			142767	142516	252	YP_811109.1	Acyl carrier protein	83.13	83	14	0	1:249	1:83	6e-35	137
OKIT_0148	orf00173_AWRIB616_contig1_group1_143783_142812_len=972	fig|336988.4.peg.152	3-oxoacyl-[acyl-carrier-protein] synthase2C KASIII (EC 2.3.1.41);Ontology_term=KEGG_ENZYME:2.3.1.41			143783	142812	972	YP_811110.1	3-oxoacyl-[acyl-carrier-protein] synthase III	67.49	323	105	0	1:969	1:323	4e-124	436
OKIT_0149	orf00174_AWRIB616_contig1_group1_144240_143770_len=471	fig|336988.4.peg.153	Transcriptional regulator of fatty acid biosynthesis FabT			144240	143770	471	YP_811111.1	MarR family transcriptional regulator	80.77	156	30	0	1:468	1:156	2e-69	253
OKIT_0150	orf00175_AWRIB616_contig1_group1_144725_144261_len=465	fig|336988.4.peg.154	(3R)-hydroxymyristoyl-[acyl carrier protein] dehydratase (EC 4.2.1.-);Ontology_term=KEGG_ENZYME:4.2.1.-			144725	144261	465	YP_811112.1	3-hydroxymyristoyl/3-hydroxydecanoyl-(acyl	80.00	145	29	0	1:435	1:145	2e-63	233
OKIT_0151	orf00177_AWRIB616_contig1_group1_144992_145981_len=990	fig|336988.4.peg.155	Biotin-protein ligase (EC 6.3.4.15) / Biotin operon repressor;Ontology_term=KEGG_ENZYME:6.3.4.15			144992	145981	990	YP_811113.1	biotin operon repressor	50.91	328	161	0	1:984	1:328	8e-94	335
OKIT_0152	orf00178_AWRIB616_contig1_group1_145974_146525_len=552	fig|336988.4.peg.156	Substrate-specific component BioY of biotin ECF transporter			145974	146525	552	YP_811114.1	hypothetical protein	56.65	173	74	1	19:534	3:175	1e-53	201
OKIT_0153	orf00181_AWRIB616_contig1_group1_147245_146631_len=615	fig|336988.4.peg.157	Thymidine kinase (EC 2.7.1.21);Ontology_term=KEGG_ENZYME:2.7.1.21			147245	146631	615	YP_811115.1	thymidine kinase	83.76	197	32	0	1:591	8:204	1e-95	341
OKIT_0154	orf00182_AWRIB616_contig1_group1_147246_148655_len=1410	fig|336988.4.peg.158	proposed amino acid ligase found clustered with an amidotransferase			147246	148655	1410	YP_811116.1	UDP-N-acetylmuramyl tripeptide synthase	77.98	445	98	0	73:1407	1:445	0.0	704
OKIT_0155	orf00183_AWRIB616_contig1_group1_148655_149389_len=735	fig|336988.4.peg.159	Putative amidotransferase similar to cobyric acid synthase			148655	149389	735	YP_811117.1	glutamine amidotransferase	84.43	244	38	0	1:732	1:244	6e-122	428
OKIT_0156	orf00184_AWRIB616_contig1_group1_150574_149393_len=1182	fig|336988.4.peg.160	permease of the major facilitator superfamily			150574	149393	1182	No_hit
OKIT_0157	orf00186_AWRIB616_contig1_group1_152057_150807_len=1251	fig|336988.4.peg.161	tRNA-dependent lipid II-Ala--L-alanine ligase			152057	150807	1251	YP_810465.1	peptidoglycan interpeptide bridge formation	60.62	386	151	1	85:1242	2:386	5e-139	486
OKIT_0158	orf00187_AWRIB616_contig1_group1_154073_152148_len=1926	fig|336988.4.peg.162	Lactose and galactose permease2C GPH translocator family			154073	152148	1926	YP_809946.1	Na+/xyloside symporter or related transporter	49.35	462	232	1	16:1395	2:463	9e-140	489
OKIT_0159	orf00188_AWRIB616_contig1_group1_154289_155302_len=1014	fig|336988.4.peg.163	transcription regulator of beta-galactosidase gene			154289	155302	1014	YP_809943.1	LacI family transcription regulator	28.91	339	226	7	1:996	1:331	1e-35	142
OKIT_0160	orf00189_AWRIB616_contig1_group1_155478_156650_len=1173	fig|336988.4.peg.164	Galactokinase (EC 2.7.1.6);Ontology_term=KEGG_ENZYME:2.7.1.6			155478	156650	1173	YP_809945.1	galactokinase	62.17	378	143	0	34:1167	13:390	6e-135	472
OKIT_0161	orf00190_AWRIB616_contig1_group1_156684_158159_len=1476	fig|336988.4.peg.165	Galactose-1-phosphate uridylyltransferase (EC 2.7.7.10);Ontology_term=KEGG_ENZYME:2.7.7.10			156684	158159	1476	YP_809944.1	galactose-1-phosphate uridylyltransferase	60.04	488	186	4	19:1473	5:486	1e-170	591
OKIT_0162	orf00191_AWRIB616_contig1_group1_158192_159235_len=1044	fig|336988.4.peg.166	Aldose 1-epimerase (EC 5.1.3.3);Ontology_term=KEGG_ENZYME:5.1.3.3			158192	159235	1044	YP_809880.1	aldose 1-epimerase	51.34	337	158	3	22:1032	8:338	7e-95	339
OKIT_0163	orf00192_AWRIB616_contig1_group1_160125_159352_len=774	fig|336988.4.peg.167	22C3-butanediol dehydrogenase2C S-alcohol forming2C (S)-acetoin-specific (EC 1.1.1.76);Ontology_term=KEGG_ENZYME:1.1.1.76			160125	159352	774	YP_811119.1	acetoin reductase	86.38	257	35	0	1:771	1:257	5e-125	439
OKIT_0164	orf00194_AWRIB616_contig1_group1_160584_160219_len=366	fig|336988.4.peg.168	transcriptional regulator2C ArsR family			160584	160219	366	YP_810099.1	ArsR family transcriptional regulator	65.55	119	41	0	1:357	1:119	2e-39	153
OKIT_0165	orf00195_AWRIB616_contig1_group1_161190_160594_len=597	fig|336988.4.peg.169	Predicted permease2C cadmium resistance protein			161190	160594	597	No_hit
OKIT_0166	orf00196_AWRIB616_contig1_group1_162116_161283_len=834	fig|336988.4.peg.170	Diadenosine tetraphosphatase related serine/threonine protein phosphatase			162116	161283	834	YP_811121.1	calcineurin-like phosphoesterase	72.92	277	75	0	1:831	1:277	2e-122	430
OKIT_0167	orf00197_AWRIB616_contig1_group1_162457_163542_len=1086	fig|336988.4.peg.171	Uncharacterized ABC-type transport system2C periplasmic component/surface lipoprotein			162457	163542	1086	YP_811123.1	ABC transporter periplasmic protein	80.33	361	71	0	1:1083	1:361	4e-174	602
OKIT_0168	orf00199_AWRIB616_contig1_group1_163605_165179_len=1575	fig|336988.4.peg.172	Putative deoxyribose-specific ABC transporter2C ATP-binding protein			163605	165179	1575	YP_811124.1	ABC-type uncharacterized transport system,	80.15	524	104	0	1:1572	1:524	0.0	829
OKIT_0169	orf00200_AWRIB616_contig1_group1_165179_166309_len=1131	fig|336988.4.peg.173	Putative deoxyribose-specific ABC transporter2C permease protein			165179	166309	1131	YP_811125.1	ABC-type uncharacterized transport system,	82.93	375	62	2	1:1119	1:375	3e-179	619
OKIT_0170	orf00201_AWRIB616_contig1_group1_166306_167262_len=957	fig|336988.4.peg.174	Unspecified monosaccharide ABC transport system2C permease component 2			166306	167262	957	YP_811126.1	ABC transporter permease	85.85	318	45	0	1:954	1:318	3e-158	550
OKIT_0171	orf00202_AWRIB616_contig1_group1_168961_167309_len=1653	fig|336988.4.peg.175	Oligopeptide ABC transporter2C periplasmic oligopeptide-binding protein OppA (TC 3.A.1.5.1)			168961	167309	1653	YP_811127.1	ABC-type oligopeptide transport system,	78.94	546	115	0	10:1647	5:550	0.0	896
OKIT_0172	orf00203_AWRIB616_contig1_group1_169128_169895_len=768	fig|336988.4.peg.176	Trehalose operon transcriptional repressor			169128	169895	768	YP_810873.1	GntR family transcriptional regulator	72.80	239	65	0	43:759	1:239	1e-98	351
OKIT_0173	orf00204_AWRIB616_contig1_group1_171584_169926_len=1659	fig|336988.4.peg.177	Trehalose-6-phosphate hydrolase (EC 3.2.1.93);Ontology_term=KEGG_ENZYME:3.2.1.93			171584	169926	1659	YP_810874.1	alpha, alpha-phosphotrehalase	77.96	549	121	0	10:1656	5:553	0.0	924
OKIT_0174	orf00205_AWRIB616_contig1_group1_173099_171588_len=1512	fig|336988.4.peg.178	PTS system2C trehalose-specific IIB component (EC 2.7.1.69) / PTS system2C trehalose-specific IIC component (EC 2.7.1.69);Ontology_term=KEGG_ENZYME:2.7.1.69,KEGG_ENZYME:2.7.1.69			173099	171588	1512	YP_810875.1	beta-glucoside-specific PTS system IIABC	84.29	503	79	0	1:1509	1:503	0.0	868
OKIT_0175	orf00206_AWRIB616_contig1_group1_173608_173120_len=489	fig|336988.4.peg.179	PTS system2C trehalose-specific IIA component (EC 2.7.1.69);Ontology_term=KEGG_ENZYME:2.7.1.69			173608	173120	489	YP_810876.1	phosphotransferase system IIA component	76.54	162	38	0	1:486	1:162	8e-71	258
OKIT_0176	tRNA	fig|336988.4.rna.33	tRNA-Gln-CTG			174325	174253
OKIT_0177	orf00208_AWRIB616_contig1_group1_175780_174365_len=1416	fig|336988.4.peg.180	FIG00886152: hypothetical protein			175780	174365	1416	YP_811139.1	amino acid transporter	81.77	406	73	1	193:1407	10:415	0.0	671
OKIT_0178	orf00209_AWRIB616_contig1_group1_176225_175893_len=333	fig|336988.4.peg.181	Thioredoxin CDS_ID OB2235			176225	175893	333	YP_811141.1	Thiol-disulfide isomerase and thioredoxin	80.91	110	21	0	1:330	1:110	3e-51	192
OKIT_0179	orf00210_AWRIB616_contig1_group1_176715_176347_len=369	fig|336988.4.peg.182	FIG00885445: hypothetical protein			176715	176347	369	YP_811142.1	hypothetical protein	70.43	115	34	0	19:363	6:120	2e-42	163
OKIT_0180	orf00211_AWRIB616_contig1_group1_177766_176783_len=984	fig|336988.4.peg.183	Exopolyphosphatase (EC 3.6.1.11);Ontology_term=KEGG_ENZYME:3.6.1.11			177766	176783	984	YP_811144.1	exopolyphosphatase	80.67	326	62	1	1:978	1:325	3e-152	530
OKIT_0181	orf00212_AWRIB616_contig1_group1_179880_177793_len=2088	fig|336988.4.peg.184	Polyphosphate kinase (EC 2.7.4.1);Ontology_term=KEGG_ENZYME:2.7.4.1			179880	177793	2088	YP_811145.1	polyphosphate kinase	78.34	697	149	1	1:2085	1:697	0.0	1101
OKIT_0182	orf00213_AWRIB616_contig1_group1_181826_179937_len=1890	fig|336988.4.peg.185	Neutral endopeptidase O (EC 3.4.24.-);Ontology_term=KEGG_ENZYME:3.4.24.-			181826	179937	1890	YP_811146.1	oligopeptidase O1	73.13	629	169	0	1:1887	1:629	0.0	967
OKIT_0183	orf00214_AWRIB616_contig1_group1_181993_183372_len=1380	fig|336988.4.peg.186	Fumarate hydratase class II (EC 4.2.1.2);Ontology_term=KEGG_ENZYME:4.2.1.2			181993	183372	1380	YP_809694.1	fumarase	59.21	456	183	1	4:1371	4:456	5e-153	533
OKIT_0184	orf00215_AWRIB616_contig1_group1_184147_183479_len=669	fig|336988.4.peg.187	Glutamate transport membrane-spanning protein			184147	183479	669	YP_811147.1	ABC-type amino acid transport system, permease	86.04	222	31	0	1:666	1:222	3e-108	383
OKIT_0185	orf00216_AWRIB616_contig1_group1_184800_184144_len=657	fig|336988.4.peg.188	Glutamate transport membrane-spanning protein			184800	184144	657	YP_811148.1	ABC-type amino acid transport system, permease	84.58	214	33	0	1:642	1:214	2e-98	350
OKIT_0186	orf00217_AWRIB616_contig1_group1_185660_184797_len=864	fig|336988.4.peg.189	Glutamine ABC transporter2C periplasmic glutamine-binding protein (TC 3.A.1.3.2)			185660	184797	864	YP_811149.1	amino acid ABC transporter periplasmic protein	86.41	287	39	0	1:861	1:287	6e-145	505
OKIT_0187	orf00218_AWRIB616_contig1_group1_186428_185673_len=756	fig|336988.4.peg.190	Glutamate transport ATP-binding protein			186428	185673	756	YP_811150.1	ABC-type polar amino acid transport system,	88.71	248	28	0	1:744	1:248	1e-124	437
OKIT_0188	orf00219_AWRIB616_contig1_group1_188339_186525_len=1815	fig|336988.4.peg.191	ABC transporter2C ATP-binding/permease protein			188339	186525	1815	YP_811151.1	ABC-type multidrug transport system, ATPase and	81.79	604	110	0	1:1812	1:604	0.0	999
OKIT_0189	orf00220_AWRIB616_contig1_group1_190102_188339_len=1764	fig|336988.4.peg.192	ABC transporter2C ATP-binding and permease protein			190102	188339	1764	YP_811152.1	tRNA-Pro	83.11	586	99	0	1:1758	1:586	0.0	977
OKIT_0190	orf00221_AWRIB616_contig1_group1_191270_190305_len=966	fig|336988.4.peg.193	Mannose-6-phosphate isomerase (EC 5.3.1.8);Ontology_term=KEGG_ENZYME:5.3.1.8			191270	190305	966	YP_809898.1	phosphomannose isomerase	60.44	321	126	1	1:963	2:321	2e-118	417
OKIT_0191	orf00222_AWRIB616_contig1_group1_191724_191344_len=381	fig|336988.4.peg.194	Putative regulator of the mannose operon2C ManO			191724	191344	381	YP_810089.1	hypothetical protein	61.98	121	46	0	1:363	1:121	4e-46	175
OKIT_0192	orf00224_AWRIB616_contig1_group1_192747_191830_len=918	fig|336988.4.peg.195	PTS system2C mannose-specific IID component (EC 2.7.1.69);Ontology_term=KEGG_ENZYME:2.7.1.69			192747	191830	918	YP_810088.1	mannose-specific PTS system component IID	79.33	300	62	0	16:915	5:304	9e-142	494
OKIT_0193	orf00225_AWRIB616_contig1_group1_193570_192767_len=804	fig|336988.4.peg.196	PTS system2C mannose-specific IIC component (EC 2.7.1.69);Ontology_term=KEGG_ENZYME:2.7.1.69			193570	192767	804	YP_810087.1	mannose-specific PTS system component IIC	74.17	271	66	1	1:801	1:271	5e-112	395
OKIT_0194	orf00226_AWRIB616_contig1_group1_194557_193571_len=987	fig|336988.4.peg.197	PTS system2C mannose-specific IIB component (EC 2.7.1.69) / PTS system2C mannose-specific IIA component (EC 2.7.1.69);Ontology_term=KEGG_ENZYME:2.7.1.69,KEGG_ENZYME:2.7.1.69			194557	193571	987	YP_810086.1	phosphotransferase system,	55.59	331	140	3	1:975	1:330	9e-101	358
OKIT_0195	tRNA	fig|336988.4.rna.34	tRNA-Pro-CGG			194836	194760
OKIT_0196	orf00227_AWRIB616_contig1_group1_196719_194872_len=1848	fig|336988.4.peg.198	FIG00885421: hypothetical protein			196719	194872	1848	YP_811153.1	amino acid transporter	86.83	615	81	0	1:1845	1:615	0.0	1071
OKIT_0197	orf00228_AWRIB616_contig1_group1_197633_196788_len=846	fig|336988.4.peg.199	Peptidyl-prolyl cis-trans isomerase (EC 5.2.1.8);Ontology_term=KEGG_ENZYME:5.2.1.8			197633	196788	846	YP_811154.1	peptidyl-prolyl cis-trans isomerase	75.45	277	64	2	1:831	1:273	9e-117	411
OKIT_0198	orf00229_AWRIB616_contig1_group1_199557_197737_len=1821	fig|336988.4.peg.200	Oligopeptide ABC transporter2C periplasmic oligopeptide-binding protein OppA (TC 3.A.1.5.1)			199557	197737	1821	YP_811132.1	ABC-type dipeptide/oligopeptide/nickel transport	40.20	592	334	8	58:1809	16:595	4e-124	437
OKIT_0199	orf00230_AWRIB616_contig1_group1_200607_199702_len=906	fig|336988.4.peg.201	Oligopeptide transport system permease protein OppC (TC 3.A.1.5.1)			200607	199702	906	YP_811133.1	ABC-type dipeptide/oligopeptide/nickel transport	40.14	294	176	0	13:894	17:310	4e-65	240
OKIT_0200	orf00231_AWRIB616_contig1_group1_201579_200620_len=960	fig|336988.4.peg.202	Oligopeptide transport system permease protein OppB (TC 3.A.1.5.1)			201579	200620	960	YP_811134.1	ABC-type dipeptide/oligopeptide/nickel transport	49.53	319	161	0	1:957	1:319	6e-94	336
OKIT_0201	orf00232_AWRIB616_contig1_group1_202583_201582_len=1002	fig|336988.4.peg.203	Oligopeptide transport ATP-binding protein OppF (TC 3.A.1.5.1)			202583	201582	1002	YP_811135.1	ABC-type dipeptide/oligopeptide/nickel transport	66.88	311	103	0	10:942	3:313	2e-121	427
OKIT_0202	orf00233_AWRIB616_contig1_group1_203620_202580_len=1041	fig|336988.4.peg.204	Oligopeptide transport ATP-binding protein OppD (TC 3.A.1.5.1)			203620	202580	1041	YP_811136.1	ABC-type dipeptide/oligopeptide/nickel transport	53.21	327	152	1	13:993	4:329	3e-95	340
OKIT_0203	orf00234_AWRIB616_contig1_group1_204731_203727_len=1005	fig|336988.4.peg.205	D-lactate dehydrogenase (EC 1.1.1.28);Ontology_term=KEGG_ENZYME:1.1.1.28			204731	203727	1005	YP_810037.1	phosphoglycerate dehydrogenase or related	33.03	333	215	7	10:996	2:330	9e-45	172
OKIT_0204	orf00235_AWRIB616_contig1_group1_205828_204758_len=1071	fig|336988.4.peg.206	Malate permease			205828	204758	1071	No_hit
OKIT_0205	orf00237_AWRIB616_contig1_group1_206273_205917_len=357	fig|336988.4.peg.207	Programmed cell death toxin YdcE			206273	205917	357	YP_811155.1	toxin-antitoxin addiction module toxin component	94.07	118	7	0	1:354	1:118	2e-60	223
OKIT_0206	orf00238_AWRIB616_contig1_group1_207426_206266_len=1161	fig|336988.4.peg.208	Alanine racemase (EC 5.1.1.1);Ontology_term=KEGG_ENZYME:5.1.1.1			207426	206266	1161	YP_811156.1	alanine racemase	76.94	386	89	0	1:1158	1:386	1e-175	608
OKIT_0207	orf00239_AWRIB616_contig1_group1_207802_207407_len=396	fig|336988.4.peg.209	Holo-[acyl-carrier protein] synthase (EC 2.7.8.7);Ontology_term=KEGG_ENZYME:2.7.8.7			207802	207407	396	YP_811157.1	phosphopantetheinyl transferase (holo-ACP	73.28	131	35	0	1:393	1:131	3e-51	192
OKIT_0208	orf00241_AWRIB616_contig1_group1_209376_207799_len=1578	fig|336988.4.peg.210	Cold-shock DEAD-box protein A			209376	207799	1578	YP_811158.1	superfamily II DNA/RNA helicase	85.14	525	74	3	1:1575	1:521	0.0	905
OKIT_0209	orf00242_AWRIB616_contig1_group1_210874_209489_len=1386	fig|336988.4.peg.211	UDP-N-acetylmuramoylalanyl-D-glutamyl-22C6-diaminopimelate--D-alanyl-D-alanine ligase (EC 6.3.2.10);Ontology_term=KEGG_ENZYME:6.3.2.10			210874	209489	1386	YP_811159.1	UDP-N-acetylmuramoyl-tripeptide--D-alanyl-D-	62.91	461	171	0	1:1383	1:461	4e-166	576
OKIT_0210	orf00244_AWRIB616_contig1_group1_211284_212510_len=1227	fig|336988.4.peg.212	Multidrug-efflux transporter2C major facilitator superfamily (MFS) (TC 2.A.1)			211284	212510	1227	YP_811160.1	major facilitator superfamily permease	82.35	408	72	0	1:1224	1:408	0.0	696
OKIT_0211	orf00245_AWRIB616_contig1_group1_214034_212520_len=1515	fig|336988.4.peg.213	L-proline glycine betaine binding ABC transporter protein ProX (TC 3.A.1.12.1) / Osmotic adaptation			214034	212520	1515	No_hit
OKIT_0212	orf00246_AWRIB616_contig1_group1_214090_214674_len=585	fig|336988.4.peg.215	Predicted integral membrane protein			214090	214674	585	YP_810509.1	integral membrane protein	37.95	195	116	4	1:576	1:193	2e-36	144
OKIT_0213	orf00247_AWRIB616_contig1_group1_214745_215185_len=441	fig|336988.4.peg.216	Universal stress protein family			214745	215185	441	YP_811161.1	universal stress protein UspA-like	78.08	146	32	0	1:438	1:146	1e-61	227
OKIT_0214	orf00248_AWRIB616_contig1_group1_217369_215228_len=2142	fig|336988.4.peg.217	Lead2C cadmium2C zinc and mercury transporting ATPase (EC 3.6.3.3) (EC 3.6.3.5)%3B Copper-translocating P-type ATPase (EC 3.6.3.4);Ontology_term=KEGG_ENZYME:3.6.3.3,KEGG_ENZYME:3.6.3.5,KEGG_ENZYME:3.6.3.4			217369	215228	2142	YP_811162.1	cation transport ATPase	65.97	673	222	2	121:2139	13:678	0.0	894
OKIT_0215	orf00249_AWRIB616_contig1_group1_217809_217366_len=444	fig|336988.4.peg.218	Negative transcriptional regulator-copper transport operon			217809	217366	444	YP_811163.1	transcriptional regulator	65.31	147	51	0	1:441	1:147	2e-51	193
OKIT_0216	orf00250_AWRIB616_contig1_group1_218509_217877_len=633	fig|336988.4.peg.219	oxidoreductase			218509	217877	633	YP_811164.1	saccharopine dehydrogenase or related protein	84.29	210	33	0	1:630	1:210	3e-99	352
OKIT_0217	orf00251_AWRIB616_contig1_group1_219911_218565_len=1347	fig|336988.4.peg.220	Enolase (EC 4.2.1.11);Ontology_term=KEGG_ENZYME:4.2.1.11			219911	218565	1347	YP_811165.1	enolase	94.42	448	25	0	1:1344	1:448	0.0	843
OKIT_0218	orf00252_AWRIB616_contig1_group1_221222_220014_len=1209	fig|336988.4.peg.221	Multiple sugar ABC transporter2C ATP-binding protein			221222	220014	1209	YP_811166.1	ABC-type sugar transport system, ATPase	85.07	402	60	0	1:1206	1:402	0.0	699
OKIT_0219	orf00253_AWRIB616_contig1_group1_222119_221385_len=735	fig|336988.4.peg.222	Triosephosphate isomerase (EC 5.3.1.1);Ontology_term=KEGG_ENZYME:5.3.1.1			222119	221385	735	YP_811167.1	triosephosphate isomerase	77.41	239	54	0	1:717	18:256	2e-108	383
OKIT_0220	orf00255_AWRIB616_contig1_group1_222140_223120_len=981	fig|336988.4.peg.223	Glycosyltransferase			222140	223120	981	YP_811168.1	hypothetical protein	51.11	315	141	4	34:969	1:305	2e-91	327
OKIT_0221	orf00256_AWRIB616_contig1_group1_223400_223092_len=309	fig|336988.4.peg.224	hypothetical protein			223400	223092	309	YP_811169.1	hypothetical protein	84.31	102	16	0	1:306	1:102	3e-50	188
OKIT_0222	orf00257_AWRIB616_contig1_group1_224410_223400_len=1011	fig|336988.4.peg.225	FIG00885924: hypothetical protein			224410	223400	1011	YP_811170.1	hypothetical protein	68.77	333	104	0	1:999	1:333	8e-136	475
OKIT_0223	orf00258_AWRIB616_contig1_group1_225275_224397_len=879	fig|336988.4.peg.226	Hypothetical protein YbbP2C contains nucleotide-binding domain of DisA bacterial checkpoint controller			225275	224397	879	YP_811171.1	hypothetical protein	84.69	294	41	1	1:870	1:294	3e-143	499
OKIT_0224	orf00259_AWRIB616_contig1_group1_227408_225291_len=2118	fig|336988.4.peg.227	FIG00342288: hypothetical protein			227408	225291	2118	YP_811172.1	NhaP-type Na+/H+ and K+/H+ antiporter	73.05	705	190	0	1:2115	1:705	0.0	1031
OKIT_0225	orf00260_AWRIB616_contig1_group1_228214_227408_len=807	fig|336988.4.peg.228	UDP-N-acetylenolpyruvoylglucosamine reductase (EC 1.1.1.158);Ontology_term=KEGG_ENZYME:1.1.1.158			228214	227408	807	YP_811173.1	UDP-N-acetylmuramate dehydrogenase	77.91	258	57	0	31:804	2:259	3e-116	410
OKIT_0226	orf00261_AWRIB616_contig1_group1_228359_229183_len=825	fig|336988.4.peg.229	Exodeoxyribonuclease III (EC 3.1.11.2);Ontology_term=KEGG_ENZYME:3.1.11.2			228359	229183	825	YP_811174.1	exonuclease III	77.49	271	61	0	1:813	1:271	2e-127	447
OKIT_0227	orf00262_AWRIB616_contig1_group1_230313_229180_len=1134	fig|336988.4.peg.230	Tellurite resistance protein			230313	229180	1134	YP_811175.1	tellurite resistance protein	78.04	378	80	1	1:1125	1:378	7e-166	575
OKIT_0228	orf00263_AWRIB616_contig1_group1_231458_230322_len=1137	fig|336988.4.peg.231	hypothetical protein			231458	230322	1137	YP_811176.1	hypothetical protein	49.82	281	125	5	1:822	1:272	4e-75	273
OKIT_0229	orf00264_AWRIB616_contig1_group1_231700_231548_len=153	fig|336988.4.peg.232	FIG00886262: hypothetical protein			231700	231548	153	No_hit
OKIT_0230	orf00265_AWRIB616_contig1_group1_232280_231663_len=618	fig|336988.4.peg.233	Peptidoglycan-binding LysM			232280	231663	618	No_hit
OKIT_0231	orf00266_AWRIB616_contig1_group1_232825_232292_len=534	fig|336988.4.peg.234	DNA polymerase III2C epsilon subunit related 3-5 exonuclease			232825	232292	534	YP_811177.1	DNA polymerase III, epsilon subunit or related	77.97	177	39	0	1:531	1:177	1e-82	297
OKIT_0232	orf00267_AWRIB616_contig1_group1_233280_232822_len=459	fig|336988.4.peg.235	ATPase YjeE2C predicted to have essential role in cell wall biosynthesis			233280	232822	459	YP_811178.1	ATPase or kinase	65.13	152	53	0	1:456	1:152	8e-57	211
OKIT_0233	orf00268_AWRIB616_contig1_group1_234144_233296_len=849	fig|336988.4.peg.236	ABC-type amino acid transport/signal transduction systems2C periplasmic component/domain			234144	233296	849	YP_811179.1	amino acid ABC transporter periplasmic protein	77.66	282	63	0	1:846	1:282	6e-130	455
OKIT_0234	orf00269_AWRIB616_contig1_group1_234791_234147_len=645	fig|336988.4.peg.237	ABC-type polar amino acid transport system2C ATPase component			234791	234147	645	YP_811180.1	ABC-type polar amino acid transport system,	76.67	210	49	0	4:633	1:210	1e-87	314
OKIT_0235	orf00270_AWRIB616_contig1_group1_235438_234788_len=651	fig|336988.4.peg.238	amino acid ABC transporter2C permease protein			235438	234788	651	YP_811181.1	ABC-type amino acid transport system, permease	83.89	211	34	0	1:633	1:211	1e-101	361
OKIT_0236	orf00271_AWRIB616_contig1_group1_235878_236888_len=1011	fig|336988.4.peg.239	Ribose operon repressor			235878	236888	1011	YP_811182.1	LacI family transcription regulator	68.45	336	105	1	1:1008	1:335	4e-133	466
OKIT_0237	orf00272_AWRIB616_contig1_group1_237008_237763_len=756	fig|336988.4.peg.240	Sugar phosphate isomerase/epimerase			237008	237763	756	YP_811183.1	sugar phosphate isomerase/epimerase	64.00	250	90	0	1:750	1:250	4e-90	323
OKIT_0238	orf00274_AWRIB616_contig1_group1_237765_239027_len=1263	fig|336988.4.peg.241	FIG00885596: hypothetical protein			237765	239027	1263	YP_811184.1	H+/gluconate symporter or related permease	80.65	429	74	1	1:1260	1:429	0.0	690
OKIT_0239	orf00275_AWRIB616_contig1_group1_239053_239835_len=783	fig|336988.4.peg.242	2-deoxy-D-gluconate 3-dehydrogenase (EC 1.1.1.125);Ontology_term=KEGG_ENZYME:1.1.1.125			239053	239835	783	YP_811185.1	Short-chain alcohol dehydrogenase	79.62	260	53	0	1:780	1:260	6e-121	425
OKIT_0240	orf00276_AWRIB616_contig1_group1_239860_240795_len=936	fig|336988.4.peg.243	D-3-phosphoglycerate dehydrogenase (EC 1.1.1.95);Ontology_term=KEGG_ENZYME:1.1.1.95			239860	240795	936	YP_811186.1	D-3-phosphoglycerate dehydrogenase	75.24	311	77	0	1:933	1:311	8e-135	471
OKIT_0241	orf00277_AWRIB616_contig1_group1_241830_240889_len=942	fig|336988.4.peg.244	Inosine-uridine preferring nucleoside hydrolase (EC 3.2.2.1);Ontology_term=KEGG_ENZYME:3.2.2.1			241830	240889	942	YP_811187.1	inosine-uridine nucleoside N-ribohydrolase	79.29	309	64	0	7:933	2:310	3e-150	523
OKIT_0242	orf00278_AWRIB616_contig1_group1_242579_241869_len=711	fig|336988.4.peg.245	Aspartate racemase (EC 5.1.1.13);Ontology_term=KEGG_ENZYME:5.1.1.13			242579	241869	711	YP_810617.1	aspartate racemase	58.19	232	97	0	1:696	1:232	1e-77	281
OKIT_0243	orf00279_AWRIB616_contig1_group1_243046_242687_len=360	fig|336988.4.peg.246	hypothetical protein			243046	242687	360	No_hit
OKIT_0244	orf00280_AWRIB616_contig1_group1_243353_244093_len=741	fig|336988.4.peg.247	3-oxoacyl-[acyl-carrier protein] reductase (EC 1.1.1.100);Ontology_term=KEGG_ENZYME:1.1.1.100			243353	244093	741	YP_810005.1	Short-chain alcohol dehydrogenase	44.90	245	125	5	4:729	4:241	1e-44	171
OKIT_0245	orf00282_AWRIB616_contig1_group1_244567_244175_len=393	fig|336988.4.peg.248	hypothetical protein			244567	244175	393	No_hit
OKIT_0246	orf00284_AWRIB616_contig1_group1_245575_244733_len=843	fig|336988.4.peg.249	hypothetical protein			245575	244733	843	No_hit
OKIT_0247	orf00285_AWRIB616_contig1_group1_246597_245602_len=996	fig|336988.4.peg.250	Predicted dehydrogenase related protein			246597	245602	996	YP_810033.1	tRNA-Arg	28.49	337	231	6	1:990	2:335	2e-31	128
OKIT_0248	orf00286_AWRIB616_contig1_group1_246992_246687_len=306	fig|336988.4.peg.251	PTS system2C fructose-specific IIB component (EC 2.7.1.69) / PTS system2C fructose-specific IIC component (EC 2.7.1.69);Ontology_term=KEGG_ENZYME:2.7.1.69,KEGG_ENZYME:2.7.1.69			246992	246687	306	No_hit
OKIT_0249	orf00288_AWRIB616_contig1_group1_247438_246989_len=450	fig|336988.4.peg.252	PTS system2C fructose-specific IIA component (EC 2.7.1.69);Ontology_term=KEGG_ENZYME:2.7.1.69			247438	246989	450	No_hit
OKIT_0250	orf00290_AWRIB616_contig1_group1_248567_247458_len=1110	fig|336988.4.peg.253	PTS system2C fructose-specific IIB component (EC 2.7.1.69) / PTS system2C fructose-specific IIC component (EC 2.7.1.69);Ontology_term=KEGG_ENZYME:2.7.1.69,KEGG_ENZYME:2.7.1.69			248567	247458	1110	No_hit
OKIT_0251	orf00291_AWRIB616_contig1_group1_248836_249693_len=858	fig|336988.4.peg.254	Sialic acid utilization regulator2C RpiR family			248836	249693	858	YP_811046.1	transcriptional regulator	26.94	271	188	4	49:855	19:281	5e-23	100
OKIT_0252	orf00292_AWRIB616_contig1_group1_251127_249751_len=1377	fig|336988.4.peg.255	RNA methyltransferase2C TrmA family			251127	249751	1377	YP_811188.1	tRNA (uracil-5-)-methyltransferase related	73.30	457	122	0	1:1371	1:457	0.0	692
OKIT_0253	orf00293_AWRIB616_contig1_group1_252089_251124_len=966	fig|336988.4.peg.256	Transcription regulator [contains diacylglycerol kinase catalytic domain]			252089	251124	966	YP_811189.1	putative lipid kinase	87.94	315	38	0	1:945	25:339	1e-157	547
OKIT_0254	orf00295_AWRIB616_contig1_group1_253678_252245_len=1434	fig|336988.4.peg.257	Aspartyl-tRNA(Asn) amidotransferase subunit B (EC 6.3.5.6) @ Glutamyl-tRNA(Gln) amidotransferase subunit B (EC 6.3.5.7);Ontology_term=KEGG_ENZYME:6.3.5.6,KEGG_ENZYME:6.3.5.7			253678	252245	1434	YP_811205.1	aspartyl/glutamyl-tRNA(Asn/Gln) amidotransferase	85.95	477	67	0	1:1431	1:477	0.0	830
OKIT_0255	orf00296_AWRIB616_contig1_group1_255141_253678_len=1464	fig|336988.4.peg.258	Aspartyl-tRNA(Asn) amidotransferase subunit A (EC 6.3.5.6) @ Glutamyl-tRNA(Gln) amidotransferase subunit A (EC 6.3.5.7);Ontology_term=KEGG_ENZYME:6.3.5.6,KEGG_ENZYME:6.3.5.7			255141	253678	1464	YP_811206.1	aspartyl/glutamyl-tRNA(Asn/Gln) amidotransferase	81.52	487	90	0	1:1461	1:487	0.0	805
OKIT_0256	orf00297_AWRIB616_contig1_group1_255445_255143_len=303	fig|336988.4.peg.259	Aspartyl-tRNA(Asn) amidotransferase subunit C (EC 6.3.5.6) @ Glutamyl-tRNA(Gln) amidotransferase subunit C (EC 6.3.5.7);Ontology_term=KEGG_ENZYME:6.3.5.6,KEGG_ENZYME:6.3.5.7			255445	255143	303	YP_811207.1	aspartyl/glutamyl-tRNA(Asn/Gln) amidotransferase	85.00	100	15	0	1:300	1:100	1e-44	169
OKIT_0257	orf00298_AWRIB616_contig1_group1_256079_255525_len=555	fig|336988.4.peg.260	Cysteinyl-tRNA synthetase related protein			256079	255525	555	YP_811208.1	hypothetical protein	91.80	183	15	0	1:549	1:183	1e-102	363
OKIT_0258	orf00299_AWRIB616_contig1_group1_256696_256136_len=561	fig|336988.4.peg.261	ADP-ribose pyrophosphatase (EC 3.6.1.13);Ontology_term=KEGG_ENZYME:3.6.1.13			256696	256136	561	YP_811209.1	NUDIX family hydrolase	77.60	183	41	0	1:549	1:183	2e-80	290
OKIT_0259	orf00300_AWRIB616_contig1_group1_257480_256689_len=792	fig|336988.4.peg.262	Regulatory protein recX			257480	256689	792	YP_811210.1	hypothetical protein	66.28	261	88	0	1:783	1:261	2e-99	353
OKIT_0260	orf00301_AWRIB616_contig1_group1_258317_257505_len=813	fig|336988.4.peg.263	Methionine aminopeptidase (EC 3.4.11.18);Ontology_term=KEGG_ENZYME:3.4.11.18			258317	257505	813	YP_811211.1	methionine aminopeptidase, type I	92.96	270	19	0	1:810	1:270	1e-152	531
OKIT_0261	orf00302_AWRIB616_contig1_group1_259319_258345_len=975	fig|336988.4.peg.264	Bactoprenol glucosyl transferase (EC 2.4.1.-);Ontology_term=KEGG_ENZYME:2.4.1.-			259319	258345	975	YP_811212.1	glycosyltransferase-like protein	76.23	324	77	0	1:972	1:324	1e-143	501
OKIT_0262	orf00303_AWRIB616_contig1_group1_260698_259322_len=1377	fig|336988.4.peg.265	amino acid transport protein			260698	259322	1377	YP_810018.1	amino acid transporter	23.41	457	316	12	7:1314	19:462	5e-25	107
OKIT_0263	orf00305_AWRIB616_contig1_group1_260803_261117_len=315	fig|336988.4.peg.266	Thioredoxin			260803	261117	315	YP_811213.1	Thiol-disulfide isomerase and thioredoxin	82.35	102	18	0	1:306	1:102	2e-46	176
OKIT_0264	orf00307_AWRIB616_contig1_group1_261230_262912_len=1683	fig|336988.4.peg.267	Acetolactate synthase2C catabolic (EC 2.2.1.6);Ontology_term=KEGG_ENZYME:2.2.1.6			261230	262912	1683	YP_811214.1	acetolactate synthase	80.89	560	107	0	1:1680	1:560	0.0	908
OKIT_0265	orf00308_AWRIB616_contig1_group1_262912_263628_len=717	fig|336988.4.peg.268	Alpha-acetolactate decarboxylase (EC 4.1.1.5);Ontology_term=KEGG_ENZYME:4.1.1.5			262912	263628	717	YP_811215.1	Alpha-acetolactate decarboxylase	66.81	238	79	0	1:714	1:238	5e-94	335
OKIT_0266	orf00309_AWRIB616_contig1_group1_265477_263681_len=1797	fig|336988.4.peg.269	Multidrug resistance ABC transporter ATP-binding and permease protein			265477	263681	1797	YP_810879.1	ABC-type multidrug transport system, ATPase and	30.33	600	389	9	37:1794	13:597	7e-80	290
OKIT_0267	orf00310_AWRIB616_contig1_group1_265880_266755_len=876	fig|336988.4.peg.270	Fructokinase (EC 2.7.1.4);Ontology_term=KEGG_ENZYME:2.7.1.4			265880	266755	876	YP_811219.1	branched chain amino acid:	91.41	291	25	0	1:873	1:291	6e-165	572
OKIT_0268	orf00311_AWRIB616_contig1_group1_266853_267854_len=1002	fig|336988.4.peg.271	Sorbitol dehydrogenase (EC 1.1.1.14);Ontology_term=KEGG_ENZYME:1.1.1.14			266853	267854	1002	YP_811218.1	threonine dehydrogenase or related Zn-dependent	90.96	332	30	0	1:996	4:335	6e-176	608
OKIT_0269	orf00312_AWRIB616_contig1_group1_267851_268633_len=783	fig|336988.4.peg.272	FIG00885767: hypothetical protein			267851	268633	783	YP_811217.1	hypothetical protein	77.35	234	53	0	76:777	19:252	1e-107	381
OKIT_0270	orf00313_AWRIB616_contig1_group1_268648_269037_len=390	fig|336988.4.peg.273	Lactoylglutathione lyase or related lyase			268648	269037	390	YP_811216.1	methylmalonyl-CoA epimerase	79.84	129	26	0	1:387	15:143	9e-61	224
OKIT_0271	orf00314_AWRIB616_contig1_group1_269254_269102_len=153	fig|336988.4.peg.274	hypothetical protein			269254	269102	153	No_hit
OKIT_0272	orf00315_AWRIB616_contig1_group1_270287_269298_len=990	fig|336988.4.peg.275	D-lactate dehydrogenase (EC 1.1.1.28);Ontology_term=KEGG_ENZYME:1.1.1.28			270287	269298	990	YP_811220.1	lactate dehydrogenase	74.61	323	82	0	13:981	1:323	2e-139	487
OKIT_0273	orf00316_AWRIB616_contig1_group1_270405_271049_len=645	fig|336988.4.peg.276	Transcriptional regulator			270405	271049	645	YP_811221.1	transcriptional regulator	54.67	214	97	0	1:642	1:214	2e-66	243
OKIT_0274	orf00317_AWRIB616_contig1_group1_271042_272766_len=1725	fig|336988.4.peg.277	ABC-type multidrug/protein/lipid transport system2C ATPase component			271042	272766	1725	YP_811222.1	ABC-type multidrug transport system, ATPase and	76.53	571	134	0	1:1713	1:571	0.0	868
OKIT_0275	orf00318_AWRIB616_contig1_group1_272766_274643_len=1878	fig|336988.4.peg.278	Lipid A export ATP-binding/permease protein MsbA			272766	274643	1878	YP_811223.1	ABC-type multidrug transport system, ATPase and	81.74	575	105	0	151:1875	1:575	0.0	953
OKIT_0276	orf00319_AWRIB616_contig1_group1_274645_275505_len=861	fig|336988.4.peg.279	hypothetical protein			274645	275505	861	No_hit
OKIT_0277	orf00320_AWRIB616_contig1_group1_275607_276554_len=948	fig|336988.4.peg.280	Putative glucose uptake permease			275607	276554	948	YP_811224.1	putative glucose uptake permease	80.32	315	62	0	1:945	1:315	4e-151	526
OKIT_0278	orf00321_AWRIB616_contig1_group1_278277_276604_len=1674	fig|336988.4.peg.281	antigen2C putative			278277	276604	1674	YP_811225.1	oxidoreductase; Myosin-crossreactive antigen	83.12	557	94	0	1:1671	1:557	0.0	981
OKIT_0279	orf00322_AWRIB616_contig1_group1_278748_279626_len=879	fig|336988.4.peg.283	Methionine ABC transporter substrate-binding protein			278748	279626	879	YP_811227.1	ABC-type metal ion transport system, periplasmic	79.11	292	61	0	1:876	36:327	1e-134	471
OKIT_0280	orf00323_AWRIB616_contig1_group1_279657_280796_len=1140	fig|336988.4.peg.284	Methionine synthase II (cobalamin-independent)			279657	280796	1140	YP_811228.1	hypothetical protein	77.84	379	83	1	1:1137	1:378	6e-180	622
OKIT_0281	tRNA	fig|336988.4.rna.35	tRNA-Met-CAT			280826	280897
OKIT_0282	orf00325_AWRIB616_contig1_group1_280976_281437_len=462	fig|336988.4.peg.285	hypothetical protein			280976	281437	462	No_hit
OKIT_0283	orf00326_AWRIB616_contig1_group1_281458_282804_len=1347	fig|336988.4.peg.286	Acetylornithine deacetylase/Succinyl-diaminopimelate desuccinylase and related deacylases			281458	282804	1347	YP_811229.1	acetylornithine	79.02	448	94	0	1:1344	1:448	0.0	715
OKIT_0284	orf00327_AWRIB616_contig1_group1_282797_283861_len=1065	fig|336988.4.peg.287	Methionine ABC transporter ATP-binding protein			282797	283861	1065	YP_811230.1	ABC-type metal ion transport system, ATPase	73.45	354	94	0	1:1062	1:354	1e-146	511
OKIT_0285	orf00328_AWRIB616_contig1_group1_283858_284550_len=693	fig|336988.4.peg.288	Methionine ABC transporter permease protein			283858	284550	693	YP_811231.1	ABC-type metal ion transport system, permease	83.41	229	38	0	1:687	1:229	2e-112	396
OKIT_0286	orf00330_AWRIB616_contig1_group1_285299_284604_len=696	fig|336988.4.peg.289	transcription regulator			285299	284604	696	YP_811236.1	GntR family transcriptional regulator	74.78	230	58	0	1:690	6:235	8e-100	355
OKIT_0287	orf00331_AWRIB616_contig1_group1_286465_285311_len=1155	fig|336988.4.peg.290	N-acetylglucosamine-6-phosphate deacetylase (EC 3.5.1.25);Ontology_term=KEGG_ENZYME:3.5.1.25			286465	285311	1155	YP_811237.1	N-acetylglucosamine 6-phosphate deacetylase	78.95	380	80	0	1:1140	1:380	4e-180	622
OKIT_0288	orf00332_AWRIB616_contig1_group1_287746_286505_len=1242	fig|336988.4.peg.291	ATP-dependent Clp protease ATP-binding subunit ClpX			287746	286505	1242	YP_811238.1	ATP-dependent protease ATP-binding subunit	88.38	413	48	0	1:1239	9:421	0.0	729
OKIT_0289	orf00333_AWRIB616_contig1_group1_289160_287841_len=1320	fig|336988.4.peg.292	Cell division trigger factor (EC 5.2.1.8);Ontology_term=KEGG_ENZYME:5.2.1.8			289160	287841	1320	YP_811239.1	FKBP-type peptidyl-prolyl cis-trans isomerase	81.55	439	81	0	1:1317	1:439	0.0	733
OKIT_0290	orf00334_AWRIB616_contig1_group1_289866_289354_len=513	fig|336988.4.peg.293	putative kinase			289866	289354	513	No_hit
OKIT_0291	orf00335_AWRIB616_contig1_group1_290578_289934_len=645	fig|336988.4.peg.294	transporter	putative bacteriocin ABC transporter	Bacteriocin	290578	289934	645	YP_809922.1	peptide ABC transporter ATPase	51.44	208	101	0	16:639	3:210	3e-58	216
OKIT_0292	orf00336_AWRIB616_contig1_group1_292728_290575_len=2154	fig|336988.4.peg.295	ABC transporter membrane-spanning permease - amino acid transport	bacteriocin immunity-associated integral membrane protein	Bacteriocin	292728	290575	2154	No_hit
OKIT_0293	orf00337_AWRIB616_contig1_group1_293152_292859_len=294	fig|336988.4.peg.296	bacteriocin2C putative	bacteriocin, lactococcin 972 family	Bacteriocin	293152	292859	294	No_hit
OKIT_0294	orf00338_AWRIB616_contig1_group1_294222_293350_len=873	fig|336988.4.peg.297	transcriptional regulator2C MutR family			294222	293350	873	YP_809849.1	1	280	171	4	19:852	8:284	6e-44	169
OKIT_0295	orf00339_AWRIB616_contig1_group1_294252_294428_len=177	fig|336988.4.peg.298	hypothetical protein			294252	294428	177	No_hit
OKIT_0296	orf00340_AWRIB616_contig1_group1_295367_294495_len=873	fig|336988.4.peg.300	transcriptional regulator2C MutR family			295367	294495	873	YP_809849.1	1	281	184	1	28:870	11:289	1e-41	162
OKIT_0297	orf00341_AWRIB616_contig1_group1_296366_295590_len=777	fig|336988.4.peg.301	hypothetical protein			296366	295590	777	No_hit
OKIT_0298	orf00342_AWRIB616_contig1_group1_296986_296363_len=624	fig|336988.4.peg.302	hypothetical protein	bacitracin transport ATP-binding protein BcrA	Bacteriocin	296986	296363	624	YP_811309.1	ABC-type multidrug transport system, ATPase	33.17	208	134	3	1:621	8:211	4e-29	120
OKIT_0299	orf00343_AWRIB616_contig1_group1_297626_296997_len=630	fig|336988.4.peg.303	hypothetical protein			297626	296997	630	No_hit
OKIT_0300	orf00344_AWRIB616_contig1_group1_298315_297614_len=702	fig|336988.4.peg.304	hypothetical protein			298315	297614	702	No_hit
OKIT_0301	orf00345_AWRIB616_contig1_group1_299010_298312_len=699	fig|336988.4.peg.305	hypothetical protein			299010	298312	699	No_hit
OKIT_0302	orf00346_AWRIB616_contig1_group1_299556_299125_len=432	fig|336988.4.peg.306	hypothetical protein			299556	299125	432	No_hit
OKIT_0303	orf00348_AWRIB616_contig1_group1_299892_299725_len=168	fig|336988.4.peg.307	hypothetical protein			299892	299725	168	No_hit
OKIT_0304	orf00349_AWRIB616_contig1_group1_300088_300507_len=420	fig|336988.4.peg.308	blasticidin S deaminase2C putative	putative blasticidin S deaminase	Bacteriocin	300088	300507	420	No_hit
OKIT_0305	orf00350_AWRIB616_contig1_group1_300651_300917_len=267	fig|336988.4.peg.309	hypothetical protein			300651	300917	267	No_hit
OKIT_0306	orf00353_AWRIB616_contig1_group1_301061_301288_len=228	fig|336988.4.peg.310	hypothetical protein			301061	301288	228	No_hit
OKIT_0307	orf00354_AWRIB616_contig1_group1_301469_301708_len=240	fig|336988.4.peg.311	hypothetical protein	Antitoxin of toxin-antitoxin system	Toxin	301469	301708	240	No_hit
OKIT_0308	orf00355_AWRIB616_contig1_group1_301686_302042_len=357	fig|336988.4.peg.312	Programmed cell death toxin MazF	PemK family toxin	Toxin	301686	302042	357	No_hit
OKIT_0309	tRNA	fig|336988.4.rna.36	tRNA-Thr-CGT			302298	302223
OKIT_0310	tRNA	fig|336988.4.rna.37	tRNA-Asn-GTT			302441	302369
OKIT_0311	orf00357_AWRIB616_contig1_group1_303214_302564_len=651	fig|336988.4.peg.314	Transcriptional regulator			303214	302564	651	YP_810739.1	transcriptional regulator	35.71	196	121	3	43:624	4:196	1e-35	142
OKIT_0312	orf00358_AWRIB616_contig1_group1_303348_304247_len=900	fig|336988.4.peg.315	ABC transporter2C ATP-binding protein			303348	304247	900	YP_810812.1	ABC-type multidrug transport system, ATPase	35.32	218	136	2	13:651	3:220	4e-31	127
OKIT_0313	orf00360_AWRIB616_contig1_group1_304247_305860_len=1614	fig|336988.4.peg.316	ABC transporter2C permease			304247	305860	1614	YP_810737.1	putative exporter of polyketide antibiotics	45.97	533	288	0	10:1608	3:535	6e-137	479
OKIT_0314	orf00361_AWRIB616_contig1_group1_305943_307310_len=1368	fig|336988.4.peg.317	permease of the major facilitator superfamily			305943	307310	1368	YP_809848.1	tRNA-Thr	73.63	455	120	0	1:1365	1:455	0.0	660
OKIT_0315	orf00362_AWRIB616_contig1_group1_307673_307314_len=360	fig|336988.4.peg.318	FIG00886268: hypothetical protein			307673	307314	360	YP_809847.1	hypothetical protein	76.79	112	26	0	4:339	5:116	1e-45	173
OKIT_0316	orf00363_AWRIB616_contig1_group1_309223_307733_len=1491	fig|336988.4.peg.319	Lysyl-tRNA synthetase (class II) (EC 6.1.1.6);Ontology_term=KEGG_ENZYME:6.1.1.6			309223	307733	1491	YP_809846.1	lysyl-tRNA synthetase (class II)	86.69	496	66	0	1:1488	1:496	0.0	887
OKIT_0317	orf00364_AWRIB616_contig1_group1_310175_309297_len=879	fig|336988.4.peg.320	Chaperonin (heat shock protein 33)			310175	309297	879	YP_809845.1	disulfide bond chaperones of the HSP33 family	67.82	289	93	0	1:867	1:289	6e-113	399
OKIT_0318	orf00366_AWRIB616_contig1_group1_312397_310217_len=2181	fig|336988.4.peg.321	Cell division protein FtsH (EC 3.4.24.-);Ontology_term=KEGG_ENZYME:3.4.24.-			312397	310217	2181	YP_809844.1	ATP-dependent Zn protease	82.29	734	117	4	1:2166	1:733	0.0	1178
OKIT_0319	orf00367_AWRIB616_contig1_group1_312998_312453_len=546	fig|336988.4.peg.322	Hypoxanthine-guanine phosphoribosyltransferase (EC 2.4.2.8);Ontology_term=KEGG_ENZYME:2.4.2.8			312998	312453	546	YP_809843.1	hypoxanthine phosphoribosyltransferase	85.64	181	26	0	1:543	1:181	3e-89	319
OKIT_0320	orf00368_AWRIB616_contig1_group1_313949_313047_len=903	fig|336988.4.peg.323	tRNA(Ile)-lysidine synthetase			313949	313047	903	No_hit
OKIT_0321	orf00369_AWRIB616_contig1_group1_314339_313977_len=363	fig|336988.4.peg.324	Septum formation initiator			314339	313977	363	YP_809842.1	septum formation initiator	61.67	120	46	0	1:360	26:145	4e-37	145
OKIT_0322	orf00370_AWRIB616_contig1_group1_314791_316086_len=1296	fig|336988.4.peg.325	Glutamine-dependent 2-keto-4-methylthiobutyrate transaminase			314791	316086	1296	YP_810369.1	aromatic amino acid aminotransferase	29.46	353	242	5	226:1275	37:385	1e-36	146
OKIT_0323	orf00371_AWRIB616_contig1_group1_316426_316151_len=276	fig|336988.4.peg.326	S4-domain-containing heat shock protein%3B S4-domain-containing heat shock protein			316426	316151	276	YP_809841.1	ribosome-associated heat shock protein	79.52	83	17	0	1:249	1:83	2e-34	135
OKIT_0324	orf00373_AWRIB616_contig1_group1_319973_316413_len=3561	fig|336988.4.peg.327	Transcription-repair coupling factor			319973	316413	3561	YP_809840.1	transcription-repair coupling factor	75.74	1187	287	1	1:3558	2:1188	0.0	1817
OKIT_0325	orf00374_AWRIB616_contig1_group1_320548_319976_len=573	fig|336988.4.peg.328	Peptidyl-tRNA hydrolase (EC 3.1.1.29);Ontology_term=KEGG_ENZYME:3.1.1.29			320548	319976	573	YP_809839.1	peptidyl-tRNA hydrolase	75.26	190	47	0	1:570	1:190	1e-80	291
OKIT_0326	orf00375_AWRIB616_contig1_group1_321381_320587_len=795	fig|336988.4.peg.329	FIG00885987: hypothetical protein			321381	320587	795	YP_809836.1	hypothetical protein	67.05	261	85	1	4:786	3:262	1e-101	361
OKIT_0327	orf00376_AWRIB616_contig1_group1_321424_321645_len=222	fig|336988.4.peg.330	hypothetical protein			321424	321645	222	No_hit
OKIT_0328	orf00378_AWRIB616_contig1_group1_322950_321823_len=1128	fig|336988.4.peg.331	hypothetical protein			322950	321823	1128	No_hit
OKIT_0329	orf00379_AWRIB616_contig1_group1_323293_322943_len=351	fig|336988.4.peg.332	Transcriptional regulator2C PadR family			323293	322943	351	No_hit
OKIT_0330	orf00380_AWRIB616_contig1_group1_324277_323366_len=912	fig|336988.4.peg.333	Similar to ribosomal large subunit pseudouridine synthase D2C Bacillus subtilis YhcT type			324277	323366	912	YP_809834.1	pseudouridylate synthase, 23S RNA-specific	60.33	300	118	1	7:906	3:301	4e-104	369
OKIT_0331	orf00381_AWRIB616_contig1_group1_324349_324954_len=606	fig|336988.4.peg.334	FIG00885719: hypothetical protein			324349	324954	606	YP_809833.1	hypothetical protein	70.85	199	58	0	7:603	4:202	1e-82	297
OKIT_0332	orf00382_AWRIB616_contig1_group1_325126_325743_len=618	fig|336988.4.peg.335	Substrate-specific component YkoE of thiamin-regulated ECF transporter for HydroxyMethylPyrimidine			325126	325743	618	YP_809832.1	hypothetical protein	65.37	205	71	0	1:615	1:205	2e-82	296
OKIT_0333	orf00383_AWRIB616_contig1_group1_325744_327015_len=1272	fig|336988.4.peg.336	Duplicated ATPase component YkoD of energizing module of thiamin-regulated ECF transporter for HydroxyMethylPyrimidine			325744	327015	1272	YP_809831.1	ABC-type cobalt transport system, ATPase	60.38	424	167	1	1:1269	1:424	2e-144	504
OKIT_0334	orf00384_AWRIB616_contig1_group1_327012_327662_len=651	fig|336988.4.peg.337	Transmembrane component YkoC of energizing module of thiamin-regulated ECF transporter for HydroxyMethylPyrimidine			327012	327662	651	YP_809830.1	ABC-type cobalt transport system, permease	66.20	216	73	0	1:648	1:216	5e-86	309
OKIT_0335	orf00385_AWRIB616_contig1_group1_327667_328758_len=1092	fig|336988.4.peg.338	FIG00885641: hypothetical protein			327667	328758	1092	YP_809829.1	hypothetical protein	44.75	362	197	1	7:1083	2:363	6e-84	303
OKIT_0336	orf00386_AWRIB616_contig1_group1_328758_329672_len=915	fig|336988.4.peg.339	Mg2+ and Co2+ transporter			328758	329672	915	YP_809828.1	Mg2+ and Co2+ transporter	76.97	304	70	0	1:912	1:304	4e-135	473
OKIT_0337	orf00387_AWRIB616_contig1_group1_331883_329697_len=2187	fig|336988.4.peg.340	Lipoteichoic acid synthase LtaS Type IIb			331883	329697	2187	YP_809823.1	phosphoglycerol transferase/alkaline phosphatase	74.69	723	182	1	1:2169	4:725	0.0	1137
OKIT_0338	orf00388_AWRIB616_contig1_group1_332384_331920_len=465	fig|336988.4.peg.341	GAF domain protein%3B CDS_ID OB2202			332384	331920	465	YP_809822.1	GAF domain-containing protein	72.08	154	43	0	1:462	1:154	8e-62	228
OKIT_0339	orf00389_AWRIB616_contig1_group1_333387_332377_len=1011	fig|336988.4.peg.342	Thioredoxin reductase (EC 1.8.1.9);Ontology_term=KEGG_ENZYME:1.8.1.9			333387	332377	1011	YP_809821.1	thioredoxin reductase	64.86	333	117	0	1:999	1:333	2e-123	434
OKIT_0340	orf00390_AWRIB616_contig1_group1_334502_333387_len=1116	fig|336988.4.peg.343	Alanine racemase (EC 5.1.1.1);Ontology_term=KEGG_ENZYME:5.1.1.1			334502	333387	1116	YP_809820.1	alanine racemase	79.25	371	77	0	1:1113	1:371	3e-178	616
OKIT_0341	orf00391_AWRIB616_contig1_group1_334621_335076_len=456	fig|336988.4.peg.344	GNAT family acetyltransferase YjcF			334621	335076	456	YP_809819.1	acetyltransferase	64.43	149	53	0	1:447	1:149	2e-54	203
OKIT_0342	orf00392_AWRIB616_contig1_group1_336090_335080_len=1011	fig|336988.4.peg.345	Ribose-phosphate pyrophosphokinase (EC 2.7.6.1);Ontology_term=KEGG_ENZYME:2.7.6.1			336090	335080	1011	YP_809818.1	phosphoribosylpyrophosphate synthetase	92.86	336	24	0	1:1008	1:336	2e-178	616
OKIT_0343	orf00393_AWRIB616_contig1_group1_336155_336856_len=702	fig|336988.4.peg.346	Ribose 5-phosphate isomerase A (EC 5.3.1.6);Ontology_term=KEGG_ENZYME:5.3.1.6			336155	336856	702	YP_809817.1	ribose-5-phosphate isomerase A	81.12	233	44	0	1:699	1:233	1e-107	381
OKIT_0344	orf00394_AWRIB616_contig1_group1_336901_338577_len=1677	fig|336988.4.peg.347	Adenine deaminase (EC 3.5.4.2);Ontology_term=KEGG_ENZYME:3.5.4.2			336901	338577	1677	YP_809816.1	adenine deaminase	86.26	553	76	0	13:1671	1:553	0.0	969
OKIT_0345	orf00395_AWRIB616_contig1_group1_339961_338648_len=1314	fig|336988.4.peg.348	GTP-binding protein related to HflX			339961	338648	1314	YP_809813.1	GTPase	75.63	435	106	0	1:1305	1:435	0.0	653
OKIT_0346	orf00396_AWRIB616_contig1_group1_340900_339995_len=906	fig|336988.4.peg.349	Inosine-uridine preferring nucleoside hydrolase (EC 3.2.2.1);Ontology_term=KEGG_ENZYME:3.2.2.1			340900	339995	906	YP_809812.1	ribonucleoside hydrolase RihC	73.04	293	79	0	22:900	2:294	1e-129	454
OKIT_0347	orf00397_AWRIB616_contig1_group1_341922_340954_len=969	fig|336988.4.peg.350	Ribose ABC transport system2C periplasmic ribose-binding protein RbsB (TC 3.A.1.2.1)			341922	340954	969	No_hit
OKIT_0348	orf00398_AWRIB616_contig1_group1_342892_341933_len=960	fig|336988.4.peg.351	Ribose ABC transport system2C permease protein RbsC (TC 3.A.1.2.1)			342892	341933	960	No_hit
OKIT_0349	orf00399_AWRIB616_contig1_group1_344374_342896_len=1479	fig|336988.4.peg.352	Ribose ABC transport system2C ATP-binding protein RbsA (TC 3.A.1.2.1)			344374	342896	1479	YP_811124.1	ABC-type uncharacterized transport system,	34.07	499	312	5	7:1467	12:505	9e-79	286
OKIT_0350	orf00400_AWRIB616_contig1_group1_344785_344387_len=399	fig|336988.4.peg.353	Ribose ABC transport system2C high affinity permease RbsD (TC 3.A.1.2.1)			344785	344387	399	YP_811130.1	D-ribose pyranase	62.12	132	49	1	1:396	1:131	2e-42	163
OKIT_0351	orf00401_AWRIB616_contig1_group1_345678_344782_len=897	fig|336988.4.peg.354	Ribokinase (EC 2.7.1.15);Ontology_term=KEGG_ENZYME:2.7.1.15			345678	344782	897	YP_809806.1	ribokinase family sugar kinase	74.51	204	52	0	271:882	1:204	4e-81	293
OKIT_0352	orf00402_AWRIB616_contig1_group1_346839_345832_len=1008	fig|336988.4.peg.355	Ribose operon repressor			346839	345832	1008	YP_809805.1	LacI family transcription regulator	72.54	335	92	0	1:1005	1:335	2e-143	500
OKIT_0353	orf00403_AWRIB616_contig1_group1_348436_346874_len=1563	fig|336988.4.peg.356	22C3-cyclic-nucleotide 2-phosphodiesterase (EC 3.1.4.16);Ontology_term=KEGG_ENZYME:3.1.4.16			348436	346874	1563	No_hit
OKIT_0354	orf00404_AWRIB616_contig1_group1_349507_348440_len=1068	fig|336988.4.peg.357	Phosphonate ABC transporter permease protein phnE1 (TC 3.A.1.9.1)			349507	348440	1068	No_hit
OKIT_0355	orf00405_AWRIB616_contig1_group1_350298_349504_len=795	fig|336988.4.peg.358	Phosphonate ABC transporter permease protein phnE2 (TC 3.A.1.9.1)			350298	349504	795	No_hit
OKIT_0356	orf00406_AWRIB616_contig1_group1_351074_350295_len=780	fig|336988.4.peg.359	Phosphonate ABC transporter ATP-binding protein (TC 3.A.1.9.1)			351074	350295	780	YP_811230.1	ABC-type metal ion transport system, ATPase	38.03	234	129	4	13:690	4:229	6e-40	156
OKIT_0357	orf00407_AWRIB616_contig1_group1_352057_351143_len=915	fig|336988.4.peg.360	Phosphonate ABC transporter phosphate-binding periplasmic component (TC 3.A.1.9.1)			352057	351143	915	No_hit
OKIT_0358	orf00408_AWRIB616_contig1_group1_352301_352963_len=663	fig|336988.4.peg.361	Membrane-associated phospholipid phosphatase			352301	352963	663	YP_809804.1	membrane-associated phospholipid phosphatase	79.55	220	45	0	1:660	1:220	2e-104	370
OKIT_0359	orf00409_AWRIB616_contig1_group1_353942_353010_len=933	fig|336988.4.peg.362	N-acetylmuramoyl-L-alanine amidase			353942	353010	933	YP_809803.1	N-acetylmuramoyl-L-alanine amidase	62.77	231	84	1	1:687	1:231	6e-88	316
OKIT_0360	orf00410_AWRIB616_contig1_group1_355378_353990_len=1389	fig|336988.4.peg.363	Osmosensitive K+ channel histidine kinase KdpD (EC 2.7.3.-);Ontology_term=KEGG_ENZYME:2.7.3.-			355378	353990	1389	YP_809802.1	Signal transduction histidine kinase	67.90	461	140	4	1:1377	1:455	2e-180	624
OKIT_0361	orf00411_AWRIB616_contig1_group1_356060_355359_len=702	fig|336988.4.peg.364	response regulator (homolog to ciaR Spn)2C truncated			356060	355359	702	YP_809801.1	DNA-binding response regulator	93.07	231	16	0	1:693	1:231	3e-119	419
OKIT_0362	orf00413_AWRIB616_contig1_group1_356483_357142_len=660	fig|336988.4.peg.365	COG3942: Surface antigen			356483	357142	660	YP_810956.1	cell wall hydrolase	39.41	203	121	1	46:654	196:396	2e-36	144
OKIT_0363	orf00415_AWRIB616_contig1_group1_358210_357197_len=1014	fig|336988.4.peg.366	Ribonucleotide reductase of class Ib (aerobic)2C beta subunit (EC 1.17.4.1);Ontology_term=KEGG_ENZYME:1.17.4.1			358210	357197	1014	YP_809800.1	ribonucleotide-diphosphate reductase subunit	88.72	337	38	0	1:1011	1:337	0.0	634
OKIT_0364	orf00416_AWRIB616_contig1_group1_360415_358244_len=2172	fig|336988.4.peg.367	Ribonucleotide reductase of class Ib (aerobic)2C alpha subunit (EC 1.17.4.1);Ontology_term=KEGG_ENZYME:1.17.4.1			360415	358244	2172	YP_809799.1	ribonucleotide-diphosphate reductase subunit	86.86	723	95	0	1:2169	1:723	0.0	1293
OKIT_0365	orf00417_AWRIB616_contig1_group1_360738_360493_len=246	fig|336988.4.peg.368	Glutaredoxin-like protein NrdH2C required for reduction of Ribonucleotide reductase class Ib			360738	360493	246	YP_809798.1	ribonucleoside-diphosphate reductase class Ib	76.54	81	19	0	1:243	1:81	8e-34	133
OKIT_0366	orf00418_AWRIB616_contig1_group1_361092_361559_len=468	fig|336988.4.peg.369	Ribonucleotide reduction protein NrdI			361092	361559	468	YP_809797.1	ribonucleotide reduction protein	76.97	152	35	0	1:456	1:152	6e-70	254
OKIT_0367	orf00419_AWRIB616_contig1_group1_361631_363016_len=1386	fig|336988.4.peg.370	Magnesium and cobalt efflux protein CorC			361631	363016	1386	YP_809796.1	hemolysin-like protein	84.78	460	70	0	1:1380	1:460	0.0	783
OKIT_0368	orf00420_AWRIB616_contig1_group1_364240_363026_len=1215	fig|336988.4.peg.371	permease of the major facilitator superfamily			364240	363026	1215	YP_809795.1	major facilitator superfamily permease	69.42	399	122	0	1:1197	1:399	5e-173	599
OKIT_0369	orf00421_AWRIB616_contig1_group1_364317_365789_len=1473	fig|336988.4.peg.372	Glucose-6-phosphate 1-dehydrogenase (EC 1.1.1.49);Ontology_term=KEGG_ENZYME:1.1.1.49			364317	365789	1473	YP_809794.1	glucose-6-phosphate 1-dehydrogenase	87.96	490	59	0	1:1470	1:490	0.0	888
OKIT_0370	orf00423_AWRIB616_contig1_group1_365900_366409_len=510	fig|336988.4.peg.373	Substrate-specific component QueT (COG4708) of predicted queuosine-regulated ECF transporter			365900	366409	510	YP_809784.1	hypothetical protein	85.21	169	25	0	1:507	1:169	6e-80	288
OKIT_0371	orf00424_AWRIB616_contig1_group1_366425_367117_len=693	fig|336988.4.peg.374	hypothetical protein			366425	367117	693	No_hit
OKIT_0372	orf00425_AWRIB616_contig1_group1_367877_367164_len=714	fig|336988.4.peg.375	Phosphoglycerate mutase (EC 5.4.2.1);Ontology_term=KEGG_ENZYME:5.4.2.1			367877	367164	714	YP_809782.1	phosphoglycerate mutase	94.09	237	14	0	1:711	1:237	2e-130	456
OKIT_0373	orf00426_AWRIB616_contig1_group1_369226_367934_len=1293	fig|336988.4.peg.376	D-alanyl-D-alanine carboxypeptidase (EC 3.4.16.4);Ontology_term=KEGG_ENZYME:3.4.16.4			369226	367934	1293	YP_809781.1	D-alanyl-D-alanine carboxypeptidase	48.11	424	219	1	19:1290	18:440	3e-111	394
OKIT_0374	orf00427_AWRIB616_contig1_group1_370430_369285_len=1146	fig|336988.4.peg.377	Osmosensitive K+ channel histidine kinase KdpD (EC 2.7.3.-);Ontology_term=KEGG_ENZYME:2.7.3.-			370430	369285	1146	YP_809780.1	Signal transduction histidine kinase	79.00	381	79	1	1:1140	1:381	7e-174	602
OKIT_0375	orf00428_AWRIB616_contig1_group1_371126_370434_len=693	fig|336988.4.peg.378	DNA-binding response regulator2C OmpR family			371126	370434	693	YP_809779.1	DNA-binding response regulator	94.78	230	12	0	1:690	1:230	1e-123	434
OKIT_0376	orf00429_AWRIB616_contig1_group1_371929_371126_len=804	fig|336988.4.peg.379	FIG00885959: hypothetical protein			371929	371126	804	YP_809778.1	hypothetical protein	63.20	269	95	3	1:801	1:267	9e-98	348
OKIT_0377	orf00430_AWRIB616_contig1_group1_373105_372002_len=1104	fig|336988.4.peg.380	GTP-binding and nucleic acid-binding protein YchF			373105	372002	1104	YP_809777.1	GTPase, translation factor	86.92	367	48	0	1:1101	1:367	0.0	635
OKIT_0378	orf00431_AWRIB616_contig1_group1_373345_373166_len=180	fig|336988.4.peg.381	hypothetical protein			373345	373166	180	YP_809776.1	hypothetical protein	77.59	58	13	0	1:174	1:58	2e-25	105
OKIT_0379	orf00432_AWRIB616_contig1_group1_374238_373351_len=888	fig|336988.4.peg.382	Chromosome (plasmid) partitioning protein ParB / Stage 0 sporulation protein J			374238	373351	888	YP_809775.1	chromosome segregation DNA-binding protein	73.22	295	79	0	1:885	1:295	3e-118	416
OKIT_0380	orf00433_AWRIB616_contig1_group1_374434_374228_len=207	fig|336988.4.peg.383	FIG00886136: hypothetical protein			374434	374228	207	YP_809774.1	hypothetical protein	76.47	68	16	0	1:204	1:68	3e-29	118
OKIT_0381	orf00434_AWRIB616_contig1_group1_375185_374406_len=780	fig|336988.4.peg.384	Chromosome (plasmid) partitioning protein ParA			375185	374406	780	YP_809773.1	chromosome segregation ATPase	87.11	256	33	0	1:768	1:256	5e-123	432
OKIT_0382	orf00435_AWRIB616_contig1_group1_375912_375178_len=735	fig|336988.4.peg.385	rRNA small subunit methyltransferase2C glucose inhibited division protein GidB			375912	375178	735	YP_809772.1	cell division SAM-dependent methyltransferase	73.25	243	63	1	1:729	1:241	1e-99	354
OKIT_0383	orf00436_AWRIB616_contig1_group1_377074_375902_len=1173	fig|336988.4.peg.386	Predicted permease			377074	375902	1173	YP_809771.1	permease	71.80	383	108	0	1:1149	1:383	1e-161	561
OKIT_0384	orf00437_AWRIB616_contig1_group1_377171_377347_len=177	fig|336988.4.peg.387	FIG00886122: hypothetical protein			377171	377347	177	YP_809770.1	hypothetical protein	91.23	57	5	0	1:171	1:57	4e-27	111
OKIT_0385	orf00438_AWRIB616_contig1_group1_377856_377374_len=483	fig|336988.4.peg.388	LSU m3Psi1915 methyltransferase RlmH			377856	377374	483	YP_809768.1	hypothetical protein	76.88	160	37	0	1:480	1:160	7e-67	244
OKIT_0386	orf00440_AWRIB616_contig1_group1_379276_378008_len=1269	fig|336988.4.peg.389	Serine protease2C DegP/HtrA2C do-like (EC 3.4.21.-);Ontology_term=KEGG_ENZYME:3.4.21.-			379276	378008	1269	YP_809767.1	trypsin-like serine protease	69.79	427	122	3	1:1266	1:425	7e-162	562
OKIT_0387	orf00441_AWRIB616_contig1_group1_381230_379326_len=1905	fig|336988.4.peg.390	Two-component sensor kinase SA14-24			381230	379326	1905	YP_809766.1	PAS/PAC sensor signal transduction histidine	81.86	634	114	1	1:1902	1:633	0.0	1014
OKIT_0388	orf00442_AWRIB616_contig1_group1_381958_381242_len=717	fig|336988.4.peg.391	Two-component response regulator SA14-24			381958	381242	717	YP_809765.1	DNA-binding response regulator	94.94	237	12	0	1:711	1:237	2e-127	446
OKIT_0389	tRNA	fig|336988.4.rna.38	tRNA-Lys-CTT			382055	382127
OKIT_0390	orf00443_AWRIB616_contig1_group1_382388_382594_len=207	fig|336988.4.peg.392	hypothetical protein			382388	382594	207	No_hit
OKIT_0391	orf00444_AWRIB616_contig1_group1_382587_382790_len=204	fig|336988.4.peg.393	hypothetical protein			382587	382790	204	No_hit
OKIT_0392	orf00445_AWRIB616_contig1_group1_382793_382960_len=168	fig|336988.4.peg.394	hypothetical protein			382793	382960	168	No_hit
OKIT_0393	orf00446_AWRIB616_contig1_group1_383096_382944_len=153	fig|336988.4.peg.395	hypothetical protein			383096	382944	153	No_hit
OKIT_0394	orf00447_AWRIB616_contig1_group1_383461_383847_len=387	fig|336988.4.peg.396	ORF-11	toxin-antitoxin system, toxin component, RelE family	Toxin	383461	383847	387	No_hit
OKIT_0395	orf00448_AWRIB616_contig1_group1_383863_384153_len=291	fig|336988.4.peg.397	Predicted transcriptional regulator			383863	384153	291	No_hit
OKIT_0396	orf00449_AWRIB616_contig1_group1_385142_385453_len=312	fig|336988.4.peg.399	hypothetical protein			385142	385453	312	No_hit
OKIT_0397	orf00450_AWRIB616_contig1_group1_385868_386755_len=888	fig|336988.4.peg.400	transcriptional regulator2C MutR family			385868	386755	888	YP_809849.1	XRE family transcriptional regulator	32.98	285	187	3	13:864	3:284	3e-37	147
OKIT_0398	orf00451_AWRIB616_contig1_group1_387868_386798_len=1071	fig|336988.4.peg.401	hypothetical protein			387868	386798	1071	No_hit
OKIT_0399	orf00452_AWRIB616_contig1_group1_388568_387861_len=708	fig|336988.4.peg.402	ABC transporter ATP-binding protein			388568	387861	708	YP_811309.1	ABC-type multidrug transport system, ATPase	30.95	210	140	3	4:627	5:211	3e-26	110
OKIT_0400	orf00453_AWRIB616_contig1_group1_389862_388570_len=1293	fig|336988.4.peg.403	hypothetical protein			389862	388570	1293	No_hit
OKIT_0401	orf00455_AWRIB616_contig1_group1_389983_390387_len=405	fig|336988.4.peg.404	hypothetical protein			389983	390387	405	No_hit
OKIT_0402	orf00456_AWRIB616_contig1_group1_391156_391356_len=201	fig|336988.4.peg.406	hypothetical protein			391156	391356	201	No_hit
OKIT_0403	orf00457_AWRIB616_contig1_group1_392691_392449_len=243	fig|336988.4.peg.407	FIG00885803: hypothetical protein			392691	392449	243	No_hit
OKIT_0404	orf00458_AWRIB616_contig1_group1_392949_392704_len=246	fig|336988.4.peg.408	hypothetical protein			392949	392704	246	YP_809753.1	hypothetical protein	61.04	77	28	1	1:231	1:75	3e-21	91.7
OKIT_0405	orf00459_AWRIB616_contig1_group1_393604_392960_len=645	fig|336988.4.peg.409	hypothetical protein			393604	392960	645	No_hit
OKIT_0406	orf00460_AWRIB616_contig1_group1_393963_393784_len=180	fig|336988.4.peg.410	hypothetical protein			393963	393784	180	No_hit
OKIT_0407	orf00461_AWRIB616_contig1_group1_394073_394273_len=201	fig|336988.4.peg.411	hypothetical protein			394073	394273	201	No_hit
OKIT_0408	orf00462_AWRIB616_contig1_group1_394748_394485_len=264	fig|336988.4.peg.412	hypothetical protein			394748	394485	264	No_hit
OKIT_0409	orf00463_AWRIB616_contig1_group1_395388_394843_len=546	fig|336988.4.peg.413	hypothetical protein			395388	394843	546	No_hit
OKIT_0410	orf00464_AWRIB616_contig1_group1_396277_395381_len=897	fig|336988.4.peg.414	replication protein2C phage-plasmid associated			396277	395381	897	No_hit
OKIT_0411	orf00465_AWRIB616_contig1_group1_396831_396277_len=555	fig|336988.4.peg.415	hypothetical protein			396831	396277	555	No_hit
OKIT_0412	orf00467_AWRIB616_contig1_group1_397042_396851_len=192	fig|336988.4.peg.416	hypothetical protein			397042	396851	192	No_hit
OKIT_0413	orf00468_AWRIB616_contig1_group1_397220_397032_len=189	fig|336988.4.peg.417	hypothetical protein			397220	397032	189	No_hit
OKIT_0414	orf00469_AWRIB616_contig1_group1_397371_397183_len=189	fig|336988.4.peg.418	hypothetical protein			397371	397183	189	No_hit
OKIT_0415	orf00471_AWRIB616_contig1_group1_397611_398576_len=966	fig|336988.4.peg.419	hypothetical protein			397611	398576	966	No_hit
OKIT_0416	orf00472_AWRIB616_contig1_group1_398643_399812_len=1170	fig|336988.4.peg.420	Phage integrase			398643	399812	1170	No_hit
OKIT_0417	orf00473_AWRIB616_contig1_group1_400774_401253_len=480	fig|336988.4.peg.421	hypothetical protein			400774	401253	480	No_hit
OKIT_0418	orf00475_AWRIB616_contig1_group1_401777_401277_len=501	fig|336988.4.peg.422	acetyltransferase2C GNAT family			401777	401277	501	No_hit
OKIT_0419	orf00476_AWRIB616_contig1_group1_401818_402651_len=834	fig|336988.4.peg.423	hypothetical protein			401818	402651	834	YP_810026.1	hypothetical protein	41.70	247	137	5	100:822	2:247	3e-48	184
OKIT_0420	orf00477_AWRIB616_contig1_group1_402733_403479_len=747	fig|336988.4.peg.424	hypothetical protein	ribosome biogenesis GTPase		402733	403479	747	No_hit
OKIT_0421	orf00478_AWRIB616_contig1_group1_403830_404717_len=888	fig|336988.4.peg.426	ABC-type multidrug transport system2C ATPase and permease component			403830	404717	888	No_hit
OKIT_0422	orf00479_AWRIB616_contig1_group1_404735_405463_len=729	fig|336988.4.peg.427	ABC transporter ATP-binding/membrane spanning permease-possible multidrug resistance			404735	405463	729	YP_810039.1	cytochrome bd biosynthesis ABC-type transporter,	34.27	213	132	6	76:702	335:543	2e-30	124
OKIT_0423	orf00480_AWRIB616_contig1_group1_406383_405529_len=855	fig|336988.4.peg.429	Short-chain alcohol dehydrogenase			406383	405529	855	YP_810302.1	Short-chain alcohol dehydrogenase	79.23	284	59	0	1:852	1:284	2e-131	460
OKIT_0424	orf00481_AWRIB616_contig1_group1_406468_406812_len=345	fig|336988.4.peg.430	transcriptional regulator2C MerR family			406468	406812	345	YP_810301.1	transcriptional regulator	65.18	112	39	0	7:342	3:114	3e-39	152
OKIT_0425	orf00482_AWRIB616_contig1_group1_407896_407012_len=885	fig|336988.4.peg.431	transcriptional regulator2C MutR family			407896	407012	885	YP_809849.1	XRE family transcriptional regulator	45.04	282	153	2	10:849	5:286	9e-65	239
OKIT_0426	orf00483_AWRIB616_contig1_group1_407908_409236_len=1329	fig|336988.4.peg.432	3-ketoacyl-CoA thiolase (EC 2.3.1.16) @ Acetyl-CoA acetyltransferase (EC 2.3.1.9);Ontology_term=KEGG_ENZYME:2.3.1.16,KEGG_ENZYME:2.3.1.9			407908	409236	1329	YP_810143.1	tRNA-Ser	41.67	384	217	2	178:1320	3:382	4e-84	304
OKIT_0427	orf00484_AWRIB616_contig1_group1_409239_410399_len=1161	fig|336988.4.peg.433	Hydroxymethylglutaryl-CoA synthase (EC 2.3.3.10);Ontology_term=KEGG_ENZYME:2.3.3.10			409239	410399	1161	YP_810542.1	hydroxymethylglutaryl-CoA synthase	47.56	389	197	5	1:1155	1:386	1e-95	342
OKIT_0428	orf00485_AWRIB616_contig1_group1_410863_410408_len=456	fig|336988.4.peg.434	hypothetical protein			410863	410408	456	No_hit
OKIT_0429	orf00486_AWRIB616_contig1_group1_411444_410974_len=471	fig|336988.4.peg.435	FIG00885512: hypothetical protein			411444	410974	471	YP_811340.1	hypothetical protein	75.00	112	28	0	4:339	3:114	2e-47	180
OKIT_0430	tRNA	fig|336988.4.rna.39	tRNA-Asn-GTT			411673	411602
OKIT_0431	orf00487_AWRIB616_contig1_group1_411799_412650_len=852	fig|336988.4.peg.436	FIG00886102: hypothetical protein			411799	412650	852	YP_811342.1	permease	84.10	283	45	0	1:849	1:283	3e-136	476
OKIT_0432	orf00488_AWRIB616_contig1_group1_412650_413018_len=369	fig|336988.4.peg.437	FIG00885792: hypothetical protein			412650	413018	369	YP_811343.1	hypothetical protein	69.17	120	37	0	7:366	5:124	3e-42	162
OKIT_0433	orf00489_AWRIB616_contig1_group1_413022_413834_len=813	fig|336988.4.peg.438	Predicted hydrolase of the HAD superfamily			413022	413834	813	YP_811344.1	tRNA-Gln	72.83	265	72	0	7:801	4:268	1e-110	391
OKIT_0434	tRNA	fig|336988.4.rna.40	tRNA-Tyr-GTA			414077	414159
OKIT_0435	tRNA	fig|336988.4.rna.41	tRNA-Gln-TTG			414205	414277
OKIT_0436	orf00491_AWRIB616_contig1_group1_414838_414326_len=513	fig|336988.4.peg.439	Low temperature requirement C protein			414838	414326	513	YP_811352.1	phosphatidylglycerophosphatase A or related	78.82	170	36	0	1:510	1:170	2e-77	280
OKIT_0437	orf00492_AWRIB616_contig1_group1_415525_414887_len=639	fig|336988.4.peg.440	hypothetical protein			415525	414887	639	YP_811353.1	hypothetical protein	41.04	212	121	3	1:633	1:209	2e-46	177
OKIT_0438	orf00493_AWRIB616_contig1_group1_415652_416542_len=891	fig|336988.4.peg.441	oxidoreductase of aldo/keto reductase family2C subgroup 1			415652	416542	891	YP_811355.1	aldo/keto reductase	77.29	295	67	0	1:885	1:295	1e-142	497
OKIT_0439	orf00494_AWRIB616_contig1_group1_416602_418473_len=1872	fig|336988.4.peg.442	Nitrogen regulatory protein P-II			416602	418473	1872	YP_811356.1	FAD(NAD)-dependent oxidoreductase	55.70	623	275	1	1:1869	1:622	0.0	723
OKIT_0440	orf00495_AWRIB616_contig1_group1_419168_418548_len=621	fig|336988.4.peg.443	Signal peptidase I (EC 3.4.21.89);Ontology_term=KEGG_ENZYME:3.4.21.89			419168	418548	621	YP_811357.1	Signal peptidase I	66.13	186	63	0	1:558	1:186	3e-69	253
OKIT_0441	orf00496_AWRIB616_contig1_group1_419785_419165_len=621	fig|336988.4.peg.444	Signal peptidase I (EC 3.4.21.89);Ontology_term=KEGG_ENZYME:3.4.21.89			419785	419165	621	YP_811358.1	Signal peptidase I	75.73	206	50	0	1:618	3:208	4e-95	339
OKIT_0442	orf00498_AWRIB616_contig1_group1_420649_419789_len=861	fig|336988.4.peg.445	Inner membrane protein translocase component YidC2C short form OxaI-like			420649	419789	861	YP_811359.1	preprotein translocase subunit YidC	75.17	286	71	0	1:858	1:286	1e-126	444
OKIT_0443	orf00499_AWRIB616_contig1_group1_420998_420639_len=360	fig|336988.4.peg.446	Ribonuclease P protein component (EC 3.1.26.5);Ontology_term=KEGG_ENZYME:3.1.26.5			420998	420639	360	YP_811360.1	RNase P protein component	74.79	119	30	0	1:357	1:119	8e-49	184
OKIT_0444	orf00500_AWRIB616_contig1_group1_421613_422959_len=1347	fig|336988.4.peg.447	Chromosomal replication initiator protein DnaA			421613	422959	1347	YP_809648.1	chromosomal replication initiator protein DnaA	88.22	450	51	1	1:1344	1:450	0.0	802
OKIT_0445	orf00502_AWRIB616_contig1_group1_423122_424249_len=1128	fig|336988.4.peg.448	DNA polymerase III beta subunit (EC 2.7.7.7);Ontology_term=KEGG_ENZYME:2.7.7.7			423122	424249	1128	YP_809649.1	DNA polymerase III, beta subunit	77.60	375	83	1	1:1125	1:374	1e-160	558
OKIT_0446	orf00504_AWRIB616_contig1_group1_424584_425705_len=1122	fig|336988.4.peg.449	DNA recombination and repair protein RecF			424584	425705	1122	YP_809653.1	DNA replication and repair protein RecF	75.00	372	93	0	1:1116	1:372	7e-163	565
OKIT_0447	orf00505_AWRIB616_contig1_group1_425698_427656_len=1959	fig|336988.4.peg.450	DNA gyrase subunit B (EC 5.99.1.3);Ontology_term=KEGG_ENZYME:5.99.1.3			425698	427656	1959	YP_809655.1	DNA gyrase subunit B	94.79	652	34	0	1:1956	1:652	0.0	1241
OKIT_0448	orf00506_AWRIB616_contig1_group1_427665_430235_len=2571	fig|336988.4.peg.451	DNA gyrase subunit A (EC 5.99.1.3);Ontology_term=KEGG_ENZYME:5.99.1.3			427665	430235	2571	YP_809657.1	DNA gyrase subunit A	89.42	860	83	4	1:2559	1:859	0.0	1494
OKIT_0449	orf00507_AWRIB616_contig1_group1_431125_430295_len=831	fig|336988.4.peg.452	NAD synthetase (EC 6.3.1.5);Ontology_term=KEGG_ENZYME:6.3.1.5			431125	430295	831	YP_809660.1	NAD synthetase	78.91	275	58	0	1:825	1:275	1e-127	447
OKIT_0450	orf00508_AWRIB616_contig1_group1_431296_432843_len=1548	fig|336988.4.peg.453	Blue copper oxidase CueO precursor			431296	432843	1548	YP_809662.1	putative multicopper oxidase	78.85	487	103	0	85:1545	2:488	0.0	834
OKIT_0451	orf00509_AWRIB616_contig1_group1_432980_433426_len=447	fig|336988.4.peg.454	SSU ribosomal protein S6p			432980	433426	447	YP_809664.1	ribosomal protein S6	78.72	141	30	0	1:423	1:141	4e-61	225
OKIT_0452	orf00510_AWRIB616_contig1_group1_433435_433980_len=546	fig|336988.4.peg.455	Single-stranded DNA-binding protein			433435	433980	546	YP_809666.1	single-stranded DNA-binding protein	82.70	185	28	1	1:543	1:185	6e-86	308
OKIT_0453	orf00511_AWRIB616_contig1_group1_434005_434325_len=321	fig|336988.4.peg.456	SSU ribosomal protein S18p			434005	434325	321	YP_809667.1	SSU ribosomal protein S18P	93.40	106	7	0	1:318	1:106	8e-55	203
OKIT_0454	orf00513_AWRIB616_contig1_group1_434371_436485_len=2115	fig|336988.4.peg.457	Phosphoesterase2C DHH family protein			434371	436485	2115	YP_809669.1	signal protein	79.74	686	136	1	55:2112	1:683	0.0	1089
OKIT_0455	orf00514_AWRIB616_contig1_group1_436494_436949_len=456	fig|336988.4.peg.458	LSU ribosomal protein L9p			436494	436949	456	YP_809671.1	50S ribosomal protein L9P	81.46	151	28	0	1:453	1:151	7e-68	248
OKIT_0456	orf00515_AWRIB616_contig1_group1_436952_438409_len=1458	fig|336988.4.peg.459	Replicative DNA helicase (EC 3.6.1.-) [SA14-24];Ontology_term=KEGG_ENZYME:3.6.1.-			436952	438409	1458	YP_809672.1	primary replicative DNA helicase	89.90	485	49	0	1:1455	1:485	0.0	863
OKIT_0457	orf00516_AWRIB616_contig1_group1_438552_439619_len=1068	fig|336988.4.peg.460	Putrescine transport ATP-binding protein PotA (TC 3.A.1.11.1)			438552	439619	1068	YP_810237.1	ABC-type spermidine/putrescine transport system,	38.95	362	191	7	16:1059	18:363	3e-61	227
OKIT_0458	orf00517_AWRIB616_contig1_group1_439622_440557_len=936	fig|336988.4.peg.461	N-Acetyl-D-glucosamine ABC transport system2C permease protein 1			439622	440557	936	YP_809902.1_YP_810983.1		30.82	279	185	6	37:858	24:299	8e-35	139
OKIT_0459	orf00518_AWRIB616_contig1_group1_440554_441411_len=858	fig|336988.4.peg.462	N-Acetyl-D-glucosamine ABC transport system2C permease protein 2			440554	441411	858	YP_809903.1	ABC-type maltose transport system, permease	33.82	275	180	2	34:852	2:276	1e-46	179
OKIT_0460	orf00519_AWRIB616_contig1_group1_441416_442687_len=1272	fig|336988.4.peg.463	ABC-type sugar transport system2C periplasmic component			441416	442687	1272	YP_810985.1	ABC-type sugar transport system, periplasmic	28.09	388	250	9	16:1113	14:394	2e-35	142
OKIT_0461	orf00520_AWRIB616_contig1_group1_442753_443976_len=1224	fig|336988.4.peg.464	FIG00742957: hypothetical protein			442753	443976	1224	No_hit
OKIT_0462	orf00521_AWRIB616_contig1_group1_444550_443984_len=567	fig|336988.4.peg.465	FIG00885705: hypothetical protein			444550	443984	567	YP_809674.1	Zn-dependent protease	52.13	188	90	0	1:564	2:189	3e-55	206
OKIT_0463	orf00522_AWRIB616_contig1_group1_445344_444553_len=792	fig|336988.4.peg.466	Predicted membrane protein			445344	444553	792	YP_809676.1	hypothetical protein	58.97	195	80	0	205:789	1:195	6e-70	256
OKIT_0464	orf00523_AWRIB616_contig1_group1_445432_445878_len=447	fig|336988.4.peg.467	D-tyrosyl-tRNA(Tyr) deacylase			445432	445878	447	YP_809677.1	D-Tyr-tRNAtyr deacylase	62.84	148	55	0	1:444	1:148	9e-50	187
OKIT_0465	orf00524_AWRIB616_contig1_group1_446616_445882_len=735	fig|336988.4.peg.468	Transcriptional regulator			446616	445882	735	YP_809877.1	transcriptional regulator	43.16	234	132	1	10:708	6:239	8e-56	209
OKIT_0466	orf00525_AWRIB616_contig1_group1_446818_448269_len=1452	fig|336988.4.peg.469	6-phospho-beta-glucosidase (EC 3.2.1.86);Ontology_term=KEGG_ENZYME:3.2.1.86			446818	448269	1452	YP_809980.1	Beta-glucosidase/6-phospho-beta-	66.74	478	155	2	25:1449	9:485	0.0	674
OKIT_0467	orf00526_AWRIB616_contig1_group1_448314_448604_len=291	fig|336988.4.peg.470	PTS system2C cellobiose-specific IIB component (EC 2.7.1.69);Ontology_term=KEGG_ENZYME:2.7.1.69			448314	448604	291	YP_810766.1_YP_809875.1		78.95	95	20	0	1:285	7:101	3e-38	148
OKIT_0468	orf00528_AWRIB616_contig1_group1_448687_449520_len=834	fig|336988.4.peg.471	PTS system2C cellobiose-specific IIC component (EC 2.7.1.69);Ontology_term=KEGG_ENZYME:2.7.1.69			448687	449520	834	YP_809981.1	cellobiose-specific PTS system IIC component	31.67	281	170	3	4:831	7:270	6e-38	149
OKIT_0469	orf00529_AWRIB616_contig1_group1_449492_450028_len=537	fig|336988.4.peg.472	PTS system2C cellobiose-specific IIC component (EC 2.7.1.69);Ontology_term=KEGG_ENZYME:2.7.1.69			449492	450028	537	YP_809873.1	cellobiose phosphotransferase system IIC	41.25	160	92	2	49:525	292:450	2e-30	124
OKIT_0470	orf00530_AWRIB616_contig1_group1_450200_450898_len=699	fig|336988.4.peg.473	Response regulator of the LytR/AlgR family			450200	450898	699	No_hit
OKIT_0471	orf00531_AWRIB616_contig1_group1_450891_452021_len=1131	fig|336988.4.peg.474	Predicted signal transduction protein with a C-terminal HATPase domain			450891	452021	1131	No_hit
OKIT_0472	orf00532_AWRIB616_contig1_group1_452098_453930_len=1833	fig|336988.4.peg.475	ABC transporter2C ATP-binding protein2C HlyB family			452098	453930	1833	YP_811152.1	tRNA-Pro	22.05	585	421	13	112:1824	23:586	2e-34	139
OKIT_0473	orf00533_AWRIB616_contig1_group1_453923_455827_len=1905	fig|336988.4.peg.476	ABC-type multidrug transport system2C ATPase and permease component			453923	455827	1905	YP_811223.1	ABC-type multidrug transport system, ATPase and	29.37	463	288	8	493:1827	127:568	2e-45	176
OKIT_0474	orf00534_AWRIB616_contig1_group1_455900_457003_len=1104	fig|336988.4.peg.477	d-aminopeptidase.			455900	457003	1104	YP_809720.1	L-aminopeptidase/D-esterase	79.62	368	74	1	1:1101	1:368	4e-168	582
OKIT_0475	orf00535_AWRIB616_contig1_group1_457215_457036_len=180	fig|336988.4.peg.478	hypothetical protein			457215	457036	180	No_hit
OKIT_0476	orf00536_AWRIB616_contig1_group1_457403_457672_len=270	fig|336988.4.peg.479	hypothetical protein			457403	457672	270	No_hit
OKIT_0477	orf00537_AWRIB616_contig1_group1_458495_457716_len=780	fig|336988.4.peg.480	ABC transporter2C permease protein			458495	457716	780	No_hit
OKIT_0478	orf00538_AWRIB616_contig1_group1_459446_458505_len=942	fig|336988.4.peg.481	ABC transporter2C ATP-binding protein			459446	458505	942	YP_810321.1	ABC-type multidrug transport system, ATPase	34.09	308	178	8	16:927	4:290	7e-41	159
OKIT_0479	orf00539_AWRIB616_contig1_group1_459582_460088_len=507	fig|336988.4.peg.482	transcription regulator (putative)			459582	460088	507	No_hit
OKIT_0480	orf00540_AWRIB616_contig1_group1_461494_460331_len=1164	fig|336988.4.peg.483	Site-specific recombinase2C prophage lsa1 integrase	bacteriophage integrase		461494	460331	1164	No_hit
OKIT_0481	orf00541_AWRIB616_contig1_group1_462527_461577_len=951	fig|336988.4.peg.484	hypothetical protein			462527	461577	951	No_hit
OKIT_0482	orf00542_AWRIB616_contig1_group1_463489_463680_len=192	fig|336988.4.peg.485	hypothetical protein			463489	463680	192	No_hit
OKIT_0483	orf00543_AWRIB616_contig1_group1_463844_464752_len=909	fig|336988.4.peg.487	hypothetical protein			463844	464752	909	No_hit
OKIT_0484	orf00544_AWRIB616_contig1_group1_464745_465308_len=564	fig|336988.4.peg.488	hypothetical protein			464745	465308	564	No_hit
OKIT_0485	orf00545_AWRIB616_contig1_group1_468611_465561_len=3051	fig|336988.4.peg.489	conserved hypothetical protein			468611	465561	3051	No_hit
OKIT_0486	orf00546_AWRIB616_contig1_group1_469426_469959_len=534	fig|336988.4.peg.491	conserved hypothetical protein			469426	469959	534	YP_809761.1	hypothetical protein	92.06	126	10	0	154:531	1:126	8e-62	228
OKIT_0487	orf00547_AWRIB616_contig1_group1_470059_470223_len=165	fig|336988.4.peg.492	hypothetical protein			470059	470223	165	No_hit
OKIT_0488	orf00548_AWRIB616_contig1_group1_470401_470586_len=186	fig|336988.4.peg.493	hypothetical protein			470401	470586	186	No_hit
OKIT_0489	orf00549_AWRIB616_contig1_group1_470837_471190_len=354	fig|336988.4.peg.494	FIG00886300: hypothetical protein	LtrC-like protein		470837	471190	354	YP_809732.1	hypothetical protein	93.24	74	5	0	118:339	4:77	1e-34	136
OKIT_0490	orf00550_AWRIB616_contig1_group1_471718_472206_len=489	fig|336988.4.peg.495	phosphoenolpyruvate-dependent sugar phosphotransferase system EIIB2C probable sorbose specific	PTS family mannose/fructose/sorbose porter component IIB		471718	472206	489	YP_810010.1	phosphotransferase system,	36.71	158	100	0	1:474	1:158	3e-31	126
OKIT_0491	orf00551_AWRIB616_contig1_group1_472225_473019_len=795	fig|336988.4.peg.496	phosphoenolpyruvate-dependent sugar phosphotransferase system EIIC2C probable sorbose specific	PTS family mannose/fructose/sorbose porter component IIC		472225	473019	795	YP_810011.1	phosphotransferase system,	36.71	207	127	2	94:702	34:240	2e-37	147
OKIT_0492	orf00552_AWRIB616_contig1_group1_473012_473830_len=819	fig|336988.4.peg.497	phosphoenolpyruvate-dependent sugar phosphotransferase system EIID2C probable fructose specific	PTS system mannose/fructose/sorbose family IID component		473012	473830	819	YP_810012.1	phosphotransferase system,	39.39	264	156	4	16:801	8:269	2e-52	197
OKIT_0493	orf00553_AWRIB616_contig1_group1_473856_474272_len=417	fig|336988.4.peg.498	PTS system2C mannose-specific IIA component (EC 2.7.1.69);Ontology_term=KEGG_ENZYME:2.7.1.69	phosphotransferase system, mannose/fructose-specific component IIA		473856	474272	417	No_hit
OKIT_0494	orf00554_AWRIB616_contig1_group1_474259_475944_len=1686	fig|336988.4.peg.499	Oligo-12C6-glucosidase (EC 3.2.1.10);Ontology_term=KEGG_ENZYME:3.2.1.10	oligo-1,6-glucosidase		474259	475944	1686	YP_809709.1	glucosidase	53.93	560	241	8	1:1662	1:549	8e-180	622
OKIT_0495	orf00555_AWRIB616_contig1_group1_475937_476941_len=1005	fig|336988.4.peg.500	MSM (multiple sugar metabolism) operon regulatory protein	LacI family sugar-binding transcriptional regulator		475937	476941	1005	YP_809805.1	LacI family transcription regulator	23.57	314	224	6	4:921	5:310	8e-22	96.7
OKIT_0496	orf00556_AWRIB616_contig1_group1_477640_477296_len=345	fig|336988.4.peg.501	hypothetical protein			477640	477296	345	No_hit
OKIT_0497	orf00557_AWRIB616_contig1_group1_477703_477978_len=276	fig|336988.4.peg.502	hypothetical protein			477703	477978	276	No_hit
OKIT_0498	orf00558_AWRIB616_contig1_group1_478327_478881_len=555	fig|336988.4.peg.503	serine/threonine kinase			478327	478881	555	No_hit
OKIT_0499	orf00559_AWRIB616_contig1_group1_479033_479344_len=312	fig|336988.4.peg.504	hypothetical protein			479033	479344	312	No_hit
OKIT_0500	orf00560_AWRIB616_contig1_group1_479580_480332_len=753	fig|336988.4.peg.505	hypothetical protein			479580	480332	753	No_hit
OKIT_0501	orf00561_AWRIB616_contig1_group1_480573_482261_len=1689	fig|336988.4.peg.507	hypothetical protein			480573	482261	1689	No_hit
OKIT_0502	orf00562_AWRIB616_contig1_group1_483168_482560_len=609	fig|336988.4.peg.508	recombinase	transposon site specific recombinase		483168	482560	609	YP_810288.1	site-specific recombinase, DNA invertase Pin	41.45	193	110	3	10:582	3:194	3e-35	140
OKIT_0503	orf00563_AWRIB616_contig1_group1_484107_483379_len=729	fig|336988.4.peg.509	Phosphosugar-binding transcriptional regulator2C RpiR family			484107	483379	729	YP_809877.1	transcriptional regulator	72.84	243	63	2	1:726	1:241	6e-98	348
OKIT_0504	orf00564_AWRIB616_contig1_group1_484360_485802_len=1443	fig|336988.4.peg.510	6-phospho-beta-glucosidase (EC 3.2.1.86);Ontology_term=KEGG_ENZYME:3.2.1.86			484360	485802	1443	YP_809876.1	6-phospho-beta-glucosidase	83.96	480	77	0	1:1440	1:480	0.0	872
OKIT_0505	orf00565_AWRIB616_contig1_group1_485832_486140_len=309	fig|336988.4.peg.511	PTS system2C cellobiose-specific IIB component (EC 2.7.1.69);Ontology_term=KEGG_ENZYME:2.7.1.69			485832	486140	309	YP_810766.1_YP_809875.1		79.21	101	21	0	1:303	1:101	7e-42	160
OKIT_0506	orf00566_AWRIB616_contig1_group1_486142_486471_len=330	fig|336988.4.peg.512	PTS system2C cellobiose-specific IIA component (EC 2.7.1.69);Ontology_term=KEGG_ENZYME:2.7.1.69			486142	486471	330	YP_810765.1_YP_809978.1_YP_809874.1		76.92	104	24	0	1:312	1:104	4e-41	158
OKIT_0507	orf00567_AWRIB616_contig1_group1_486495_487844_len=1350	fig|336988.4.peg.513	PTS system2C cellobiose-specific IIC component (EC 2.7.1.69);Ontology_term=KEGG_ENZYME:2.7.1.69			486495	487844	1350	YP_809873.1	cellobiose phosphotransferase system IIC	80.95	441	84	0	22:1344	8:448	0.0	744
OKIT_0508	orf00569_AWRIB616_contig1_group1_489432_488461_len=972	fig|336988.4.peg.514	NADPH:quinone reductase or related Zn-dependent oxidoreductase			489432	488461	972	YP_810114.1	NADPH:quinone reductase or related Zn-dependent	77.04	135	31	0	565:969	1:135	1e-54	205
OKIT_0509	orf00570_AWRIB616_contig1_group1_489560_490018_len=459	fig|336988.4.peg.515	transcriptional regulator2C MarR family			489560	490018	459	YP_810115.1	transcriptional regulator	69.54	151	46	0	1:453	1:151	2e-59	220
OKIT_0510	orf00571_AWRIB616_contig1_group1_490504_490184_len=321	fig|336988.4.peg.516	short chain dehydrogenase			490504	490184	321	No_hit
OKIT_0511	orf00572_AWRIB616_contig1_group1_491027_490458_len=570	fig|336988.4.peg.517	short chain dehydrogenase			491027	490458	570	YP_811080.1	Short-chain dehydrogenase of various substrate	49.46	184	93	0	1:552	1:184	6e-50	189
OKIT_0512	orf00574_AWRIB616_contig1_group1_491418_491651_len=234	fig|336988.4.peg.519	hypothetical protein			491418	491651	234	YP_810888.1	hypothetical protein	63.16	76	28	0	1:228	1:76	2e-23	99.4
OKIT_0513	orf00575_AWRIB616_contig1_group1_492356_492015_len=342	fig|336988.4.peg.521	hypothetical protein			492356	492015	342	No_hit
OKIT_0514	orf00576_AWRIB616_contig1_group1_492978_493661_len=684	fig|336988.4.peg.522	transposase	transposon transposase		492978	493661	684	No_hit
OKIT_0515	orf00577_AWRIB616_contig1_group1_495097_493676_len=1422	fig|336988.4.peg.523	Type III restriction enzyme2C res subunit:DEAD/DEAH box helicase2C N-terminal	type III restriction-modification system restriction subunit	RM	495097	493676	1422	No_hit
OKIT_0516	orf00578_AWRIB616_contig1_group1_495555_495208_len=348	fig|336988.4.peg.524	FIG00886300: hypothetical protein			495555	495208	348	YP_809732.1	hypothetical protein	100.00	79	0	0	109:345	1:79	9e-40	154
OKIT_0517	orf00579_AWRIB616_contig1_group1_496378_495557_len=822	fig|336988.4.peg.525	Chromosome (plasmid) partitioning protein ParA / Sporulation initiation inhibitor protein Soj	plasmid replication-associated protein RepB		496378	495557	822	No_hit
OKIT_0518	orf00580_AWRIB616_contig1_group1_497019_498077_len=1059	fig|336988.4.peg.526	replication protein	plasmid replication initiation protein repA		497019	498077	1059	No_hit
OKIT_0519	orf00581_AWRIB616_contig1_group1_498300_498581_len=282	fig|336988.4.peg.527	DNA-damage-inducible gene	addiction module antitoxin, RelB/DinJ family	Toxin	498300	498581	282	No_hit
OKIT_0520	orf00582_AWRIB616_contig1_group1_498571_499077_len=507	fig|336988.4.peg.528	FIG00753329: hypothetical protein			498571	499077	507	No_hit
OKIT_0521	orf00583_AWRIB616_contig1_group1_499345_499067_len=279	fig|336988.4.peg.529	FIG00746002: hypothetical protein	hypothetical protein pWCFS103_40	Conjugation	499345	499067	279	No_hit
OKIT_0522	orf00584_AWRIB616_contig1_group1_499574_499365_len=210	fig|336988.4.peg.530	FIG00746404: hypothetical protein	hypothetical protein pWCFS103_39	Conjugation	499574	499365	210	No_hit
OKIT_0523	orf00585_AWRIB616_contig1_group1_499844_501904_len=2061	fig|336988.4.peg.531	FIG00749639: hypothetical protein	nicking enzyme (TraA)	Conjugation	499844	501904	2061	YP_809730.1	hypothetical protein	54.47	123	56	0	1690:2058	1:123	1e-35	143
OKIT_0524	orf00586_AWRIB616_contig1_group1_502333_502947_len=615	fig|336988.4.peg.532	FIG00745127: hypothetical protein	hypothetical protein pWCFS103_36	Conjugation	502333	502947	615	No_hit
OKIT_0525	orf00587_AWRIB616_contig1_group1_502949_503284_len=336	fig|336988.4.peg.533	protein TrsB	TrsB(TraB) family protein	Conjugation	502949	503284	336	No_hit
OKIT_0526	orf00588_AWRIB616_contig1_group1_503305_503667_len=363	fig|336988.4.peg.534	protein TrsC	TrsC(Trac) family protein	Conjugation	503305	503667	363	No_hit
OKIT_0527	orf00589_AWRIB616_contig1_group1_503636_504295_len=660	fig|336988.4.peg.535	conjugation protein	TrsD (TraD) family protein	Conjugation	503636	504295	660	No_hit
OKIT_0528	orf00590_AWRIB616_contig1_group1_504307_506325_len=2019	fig|336988.4.peg.536	protein TrsE	TrsE (TraE) family protein	Conjugation	504307	506325	2019	No_hit
OKIT_0529	orf00591_AWRIB616_contig1_group1_506318_507736_len=1419	fig|336988.4.peg.537	protein TrsF	TrsF (TraF) family protein	Conjugation	506318	507736	1419	No_hit
OKIT_0530	orf00592_AWRIB616_contig1_group1_507737_508891_len=1155	fig|336988.4.peg.538	FIG00749129: hypothetical protein	hypothetical protein pWCFS103_30	Conjugation	507737	508891	1155	No_hit
OKIT_0531	orf00593_AWRIB616_contig1_group1_508906_509523_len=618	fig|336988.4.peg.539	FIG00748167: hypothetical protein	hypothetical protein pWCFS103_29	Conjugation	508906	509523	618	No_hit
OKIT_0532	orf00594_AWRIB616_contig1_group1_509594_509878_len=285	fig|336988.4.peg.540	FIG00752991: hypothetical protein	hypothetical protein pWCFS103_28	Conjugation	509594	509878	285	No_hit
OKIT_0533	orf00595_AWRIB616_contig1_group1_509879_510349_len=471	fig|336988.4.peg.541	protein TrsJ	TrsJ (TraJ) family protein	Conjugation	509879	510349	471	No_hit
OKIT_0534	orf00596_AWRIB616_contig1_group1_510351_511862_len=1512	fig|336988.4.peg.542	conjugation protein	TraG/TraD/TrsK family protein	Conjugation	510351	511862	1512	No_hit
OKIT_0535	orf00597_AWRIB616_contig1_group1_511877_512266_len=390	fig|336988.4.peg.543	hypothetical protein			511877	512266	390	No_hit
OKIT_0536	orf00598_AWRIB616_contig1_group1_512285_513124_len=840	fig|336988.4.peg.544	conjugation protein	TrsL family protein	Conjugation	512285	513124	840	No_hit
OKIT_0537	orf00599_AWRIB616_contig1_group1_513391_514281_len=891	fig|336988.4.peg.545	DNA topoisomerase III (EC 5.99.1.2);Ontology_term=KEGG_ENZYME:5.99.1.2	TrsI(TraI) family protein	Conjugation	513391	514281	891	YP_809757.1	topoisomerase IA	64.83	290	91	5	49:885	432:721	5e-99	352
OKIT_0538	orf00600_AWRIB616_contig1_group1_514405_515319_len=915	fig|336988.4.peg.546	adenine methyltransferase M.PleI	type IIs modification methyltransferase	RM	514405	515319	915	No_hit
OKIT_0539	orf00601_AWRIB616_contig1_group1_515470_517056_len=1587	fig|336988.4.peg.547	Type IIs restriction endonuclease	type IIs restriction endonuclease	RM	515470	517056	1587	No_hit
OKIT_0540	orf00602_AWRIB616_contig1_group1_517145_517828_len=684	fig|336988.4.peg.548	transposase	transposon transposase		517145	517828	684	No_hit
OKIT_0541	orf00603_AWRIB616_contig1_group1_518080_518922_len=843	fig|336988.4.peg.549	Transcriptional regulator2C RpiR family	probably regulators of genes involved in phosphosugar metobolism		518080	518922	843	No_hit
OKIT_0542	orf00604_AWRIB616_contig1_group1_518923_520338_len=1416	fig|336988.4.peg.550	6-phospho-beta-glucosidase (EC 3.2.1.86);Ontology_term=KEGG_ENZYME:3.2.1.86			518923	520338	1416	YP_809980.1	Beta-glucosidase/6-phospho-beta-	57.29	473	191	3	4:1389	9:481	4e-171	593
OKIT_0543	orf00605_AWRIB616_contig1_group1_520344_521639_len=1296	fig|336988.4.peg.551	PTS system2C cellobiose-specific IIC component (EC 2.7.1.69);Ontology_term=KEGG_ENZYME:2.7.1.69			520344	521639	1296	YP_809981.1	cellobiose-specific PTS system IIC component	36.03	433	263	6	7:1293	8:430	2e-76	278
OKIT_0544	orf00606_AWRIB616_contig1_group1_522054_522209_len=156	fig|336988.4.peg.552	hypothetical protein			522054	522209	156	No_hit
OKIT_0545	orf00607_AWRIB616_contig1_group1_522411_522998_len=588	fig|336988.4.peg.553	Site-specific recombinase2C DNA invertase Pin related protein			522411	522998	588	YP_810288.1		44.95	198	96	5	7:570	2:196	6e-40	155
OKIT_0546	orf00608_AWRIB616_contig1_group1_527652_523807_len=3846	fig|336988.4.peg.555	hypothetical protein			527652	523807	3846	No_hit
OKIT_0547	orf00609_AWRIB616_contig1_group1_528413_527805_len=609	fig|336988.4.peg.556	recombinase			528413	527805	609	YP_810288.1		41.97	193	109	3	10:582	3:194	7e-36	142
OKIT_0548	orf00610_AWRIB616_contig1_group1_529036_528728_len=309	fig|336988.4.peg.557	hypothetical protein			529036	528728	309	No_hit
OKIT_0549	orf00611_AWRIB616_contig1_group1_529490_529801_len=312	fig|336988.4.peg.558	hypothetical protein			529490	529801	312	No_hit
OKIT_0550	orf00612_AWRIB616_contig1_group1_530992_530171_len=822	fig|336988.4.peg.559	aerobic energy metabolism			530992	530171	822	YP_811080.1	Short-chain dehydrogenase of various substrate	42.86	273	152	3	1:816	1:270	3e-57	214
OKIT_0551	orf00614_AWRIB616_contig1_group1_531383_531616_len=234	fig|336988.4.peg.561	hypothetical protein			531383	531616	234	YP_810888.1	hypothetical protein	63.16	76	28	0	1:228	1:76	2e-23	99.4
OKIT_0552	orf00615_AWRIB616_contig1_group1_532321_531980_len=342	fig|336988.4.peg.563	hypothetical protein			532321	531980	342	No_hit
OKIT_0553	orf00616_AWRIB616_contig1_group1_533817_534194_len=378	fig|336988.4.peg.564	hypothetical protein			533817	534194	378	No_hit
OKIT_0554	orf00618_AWRIB616_contig1_group1_535940_535029_len=912	fig|336988.4.peg.566	Transcriptional regulator2C LacI family			535940	535029	912	YP_811182.1	LacI family transcription regulator	31.70	306	202	5	1:909	34:335	9e-38	149
OKIT_0555	orf00619_AWRIB616_contig1_group1_537671_536139_len=1533	fig|336988.4.peg.567	Gluconokinase (EC 2.7.1.12);Ontology_term=KEGG_ENZYME:2.7.1.12			537671	536139	1533	YP_810947.1	gluconate kinase	62.60	508	189	1	1:1521	1:508	0.0	651
OKIT_0556	orf00621_AWRIB616_contig1_group1_539037_537703_len=1335	fig|336988.4.peg.568	Gluconate permease2C Bsu4004 homolog			539037	537703	1335	YP_810946.1	H+/gluconate symporter or related permease	47.97	469	215	2	4:1323	27:495	1e-126	445
OKIT_0557	orf00622_AWRIB616_contig1_group1_539826_539053_len=774	fig|336988.4.peg.569	2-deoxy-D-gluconate 3-dehydrogenase (EC 1.1.1.125);Ontology_term=KEGG_ENZYME:1.1.1.125			539826	539053	774	YP_811185.1	Short-chain alcohol dehydrogenase	64.59	257	90	1	4:771	4:260	1e-96	344
OKIT_0558	orf00624_AWRIB616_contig1_group1_540917_541951_len=1035	fig|336988.4.peg.571	short-chain dehydrogenase/reductase SDR			540917	541951	1035	No_hit
OKIT_0559	orf00623_AWRIB616_contig1_group1_540923_540237_len=687	fig|336988.4.peg.570	transcription regulator2C merR family NMB1303			540923	540237	687	No_hit
OKIT_0560	tRNA	fig|336988.4.rna.42	tRNA-Ala-CGC			542381	542309
OKIT_0561	orf00625_AWRIB616_contig1_group1_543682_542429_len=1254	fig|336988.4.peg.572	Tyrosyl-tRNA synthetase (EC 6.1.1.1);Ontology_term=KEGG_ENZYME:6.1.1.1			543682	542429	1254	YP_811317.1	tRNA-Ala	79.81	416	84	0	1:1248	1:416	0.0	673
OKIT_0562	orf00626_AWRIB616_contig1_group1_544607_543912_len=696	fig|336988.4.peg.573	hypothetical protein			544607	543912	696	YP_811316.1	hypothetical protein	46.15	221	119	0	25:687	11:231	6e-63	232
OKIT_0563	orf00628_AWRIB616_contig1_group1_545116_544607_len=510	fig|336988.4.peg.574	Transcriptional regulator			545116	544607	510	YP_811315.1	transcriptional regulator	76.33	169	40	0	1:507	1:169	1e-72	264
OKIT_0564	orf00630_AWRIB616_contig1_group1_545269_547722_len=2454	fig|336988.4.peg.575	Xylulose-5-phosphate phosphoketolase (EC 4.1.2.9)%3B Fructose-6-phosphate phosphoketolase (EC 4.1.2.22);Ontology_term=KEGG_ENZYME:4.1.2.9,KEGG_ENZYME:4.1.2.22			545269	547722	2454	YP_811314.1	putative phosphoketolase	94.98	817	41	0	1:2451	1:817	0.0	1631
OKIT_0565	orf00631_AWRIB616_contig1_group1_547909_548658_len=750	fig|336988.4.peg.576	tributyrin esterase			547909	548658	750	YP_810319.1	esterase	30.62	258	159	6	1:726	1:254	2e-31	128
OKIT_0566	orf00633_AWRIB616_contig1_group1_549700_548717_len=984	fig|336988.4.peg.577	L-asparaginase (EC 3.5.1.1);Ontology_term=KEGG_ENZYME:3.5.1.1			549700	548717	984	No_hit
OKIT_0567	orf00634_AWRIB616_contig1_group1_551160_549706_len=1455	fig|336988.4.peg.578	Glutamine ABC transporter2C periplasmic glutamine-binding protein (TC 3.A.1.3.2) / Glutamine transport system permease protein GlnP (TC 3.A.1.3.2)			551160	549706	1455	YP_811310.1	ABC-type amino acid transport system, permease	78.63	468	100	0	49:1452	1:468	0.0	751
OKIT_0568	orf00635_AWRIB616_contig1_group1_551320_551973_len=654	fig|336988.4.peg.580	YbbL ABC transporter ATP-binding protein			551320	551973	654	YP_810237.1	ABC-type spermidine/putrescine transport system,	40.93	215	117	8	10:636	15:225	1e-31	128
OKIT_0569	orf00636_AWRIB616_contig1_group1_551966_552745_len=780	fig|336988.4.peg.581	YbbM seven transmembrane helix protein			551966	552745	780	No_hit
OKIT_0570	orf00637_AWRIB616_contig1_group1_552887_553813_len=927	fig|336988.4.peg.582	ABC transporter ATP-binding protein			552887	553813	927	YP_811309.1	ABC-type multidrug transport system, ATPase	79.22	308	63	1	1:924	1:307	8e-136	475
OKIT_0571	orf00638_AWRIB616_contig1_group1_553813_554625_len=813	fig|336988.4.peg.583	membrane spanning protein			553813	554625	813	YP_811308.1	ABC-type transport system for multi-copper	67.41	270	87	1	1:810	1:269	8e-104	368
OKIT_0572	orf00639_AWRIB616_contig1_group1_554643_555014_len=372	fig|336988.4.peg.584	Transcriptional regulator2C GntR family			554643	555014	372	YP_811307.1	GntR family transcriptional regulator	69.11	123	38	0	1:369	1:123	5e-47	178
OKIT_0573	orf00640_AWRIB616_contig1_group1_555001_555894_len=894	fig|336988.4.peg.585	ABC transporter2C ATP-binding protein			555001	555894	894	YP_811306.1	ABC-type multidrug transport system, ATPase	75.51	294	72	0	1:882	1:294	2e-130	457
OKIT_0574	orf00641_AWRIB616_contig1_group1_555898_557340_len=1443	fig|336988.4.peg.586	hypothetical protein			555898	557340	1443	YP_811305.1	hypothetical protein	39.14	442	260	4	91:1404	1:437	1e-89	322
OKIT_0575	orf00642_AWRIB616_contig1_group1_557327_557992_len=666	fig|336988.4.peg.587	hypothetical protein			557327	557992	666	No_hit
OKIT_0576	orf00643_AWRIB616_contig1_group1_558012_559037_len=1026	fig|336988.4.peg.588	Tryptophanyl-tRNA synthetase (EC 6.1.1.2);Ontology_term=KEGG_ENZYME:6.1.1.2			558012	559037	1026	YP_811304.1	tryptophanyl-tRNA synthetase II	84.75	341	52	0	1:1023	1:341	5e-171	592
OKIT_0577	orf00644_AWRIB616_contig1_group1_559034_560122_len=1089	fig|336988.4.peg.589	Hydroxymethylglutaryl-CoA reductase (EC 1.1.1.34);Ontology_term=KEGG_ENZYME:1.1.1.34			559034	560122	1089	YP_811303.1	3-hydroxy-3-methylglutaryl-coenzyme A reductase	65.56	360	124	0	1:1080	1:360	7e-136	475
OKIT_0578	orf00645_AWRIB616_contig1_group1_560119_561636_len=1518	fig|336988.4.peg.590	Phosphoenolpyruvate carboxylase2C archaeal (EC 4.1.1.31);Ontology_term=KEGG_ENZYME:4.1.1.31			560119	561636	1518	YP_811302.1	phosphoenolpyruvate carboxylase	81.46	507	92	1	1:1515	1:507	0.0	828
OKIT_0579	orf00646_AWRIB616_contig1_group1_561633_562337_len=705	fig|336988.4.peg.591	NAD-dependent protein deacetylase of SIR2 family			561633	562337	705	YP_811301.1	Sir2 family NAD-dependent protein deacetylase	77.83	230	51	0	4:693	1:230	4e-106	375
OKIT_0580	orf00647_AWRIB616_contig1_group1_562347_563237_len=891	fig|336988.4.peg.592	Cobalt-zinc-cadmium resistance protein CzcD			562347	563237	891	YP_811300.1	Co/Zn/Cd efflux system component	70.95	296	86	0	1:888	1:296	1e-124	438
OKIT_0581	orf00648_AWRIB616_contig1_group1_563569_565125_len=1557	fig|336988.4.peg.593	Manganese transport protein MntH			563569	565125	1557	YP_811299.1	manganese transporter NRAMP	92.94	510	36	0	1:1530	15:524	0.0	919
OKIT_0582	orf00649_AWRIB616_contig1_group1_565231_565677_len=447	fig|336988.4.peg.594	Universal stress protein family			565231	565677	447	YP_811298.1	universal stress protein UspA-like	85.81	148	21	0	1:444	1:148	2e-68	249
OKIT_0583	orf00650_AWRIB616_contig1_group1_565750_566430_len=681	fig|336988.4.peg.595	integral membrane protein			565750	566430	681	YP_811297.1_YP_810101.1		70.85	223	65	0	1:669	1:223	6e-86	308
OKIT_0584	orf00651_AWRIB616_contig1_group1_566430_567131_len=702	fig|336988.4.peg.596	FIG00886141: hypothetical protein			566430	567131	702	YP_811296.1_YP_810100.1		70.98	224	65	0	28:699	4:227	2e-88	317
OKIT_0585	orf00652_AWRIB616_contig1_group1_568866_567193_len=1674	fig|336988.4.peg.597	Alkyl hydroperoxide reductase protein F (EC 1.6.4.-);Ontology_term=KEGG_ENZYME:1.6.4.-			568866	567193	1674	YP_810176.1	thioredoxin reductase	36.81	307	182	3	19:927	5:303	1e-53	202
OKIT_0586	orf00653_AWRIB616_contig1_group1_569449_568886_len=564	fig|336988.4.peg.598	Alkyl hydroperoxide reductase protein C (EC 1.6.4.-);Ontology_term=KEGG_ENZYME:1.6.4.-			569449	568886	564	No_hit
OKIT_0587	orf00654_AWRIB616_contig1_group1_570938_569646_len=1293	fig|336988.4.peg.599	Deoxyguanosinetriphosphate triphosphohydrolase (EC 3.1.5.1);Ontology_term=KEGG_ENZYME:3.1.5.1			570938	569646	1293	YP_811294.1	HD superfamily phosphohydrolase	84.65	430	66	0	1:1290	1:430	0.0	754
OKIT_0588	orf00655_AWRIB616_contig1_group1_570986_571423_len=438	fig|336988.4.peg.600	FIG00885462: hypothetical protein			570986	571423	438	YP_811293.1	hypothetical protein	66.21	145	49	0	1:435	2:146	6e-53	198
OKIT_0589	orf00656_AWRIB616_contig1_group1_571450_572028_len=579	fig|336988.4.peg.601	DNA-directed RNA polymerase delta subunit (EC 2.7.7.6);Ontology_term=KEGG_ENZYME:2.7.7.6			571450	572028	579	YP_811292.1	DNA-directed RNA polymerase, delta subunit	73.85	195	48	2	1:576	1:195	4e-80	289
OKIT_0590	orf00657_AWRIB616_contig1_group1_572158_573786_len=1629	fig|336988.4.peg.602	CTP synthase (EC 6.3.4.2);Ontology_term=KEGG_ENZYME:6.3.4.2			572158	573786	1629	YP_811290.1	CTP synthetase	89.28	541	58	0	1:1623	1:541	0.0	960
OKIT_0591	orf00658_AWRIB616_contig1_group1_573826_575112_len=1287	fig|336988.4.peg.603	UDP-N-acetylglucosamine 1-carboxyvinyltransferase (EC 2.5.1.7);Ontology_term=KEGG_ENZYME:2.5.1.7			573826	575112	1287	YP_811289.1	UDP-N-acetylglucosamine	92.52	428	32	0	1:1284	1:428	0.0	782
OKIT_0592	orf00659_AWRIB616_contig1_group1_575209_575451_len=243	fig|336988.4.peg.604	LSU ribosomal protein L31p			575209	575451	243	YP_811288.1	50S ribosomal protein L31P	93.67	79	5	0	1:237	1:79	7e-41	157
OKIT_0593	orf00660_AWRIB616_contig1_group1_575509_576939_len=1431	fig|336988.4.peg.605	Dipeptidase (EC 3.4.-.-);Ontology_term=KEGG_ENZYME:3.4.-.-			575509	576939	1431	YP_811287.1	dipeptidase A	79.62	476	97	0	1:1428	1:476	0.0	796
OKIT_0594	orf00661_AWRIB616_contig1_group1_577026_577988_len=963	fig|336988.4.peg.606	Oxidoreductase2C aldo/keto reductase family			577026	577988	963	YP_811286.1	oxidoreductase	80.00	320	64	0	1:960	1:320	9e-153	531
OKIT_0595	orf00662_AWRIB616_contig1_group1_578166_580361_len=2196	fig|336988.4.peg.607	Alpha-galactosidase (EC 3.2.1.22);Ontology_term=KEGG_ENZYME:3.2.1.22			578166	580361	2196	YP_811285.1	Alpha-galactosidase	78.98	728	153	0	1:2184	1:728	0.0	1202
OKIT_0596	orf00663_AWRIB616_contig1_group1_580358_581755_len=1398	fig|336988.4.peg.608	Lactose and galactose permease2C GPH translocator family			580358	581755	1398	YP_809946.1	Na+/xyloside symporter or related transporter	38.88	463	275	3	1:1368	1:462	4e-104	370
OKIT_0597	orf00664_AWRIB616_contig1_group1_581755_582006_len=252	fig|336988.4.peg.609	hypothetical protein			581755	582006	252	No_hit
OKIT_0598	orf00665_AWRIB616_contig1_group1_582061_583113_len=1053	fig|336988.4.peg.610	Galactose operon repressor2C GalR-LacI family of transcriptional regulators			582061	583113	1053	YP_809943.1	LacI family transcription regulator	26.47	340	237	6	7:1023	4:331	3e-32	131
OKIT_0599	orf00666_AWRIB616_contig1_group1_583189_584658_len=1470	fig|336988.4.peg.611	Sucrose phosphorylase (EC 2.4.1.7);Ontology_term=KEGG_ENZYME:2.4.1.7			583189	584658	1470	YP_811283.1	glycosidase	80.82	485	93	0	1:1455	1:485	0.0	806
OKIT_0600	orf00667_AWRIB616_contig1_group1_585359_584691_len=669	fig|336988.4.peg.612	Predicted HD superfamily hydrolase			585359	584691	669	YP_811257.1	HD superfamily hydrolase	67.59	216	70	0	19:666	4:219	6e-86	308
OKIT_0601	orf00668_AWRIB616_contig1_group1_585439_586041_len=603	fig|336988.4.peg.613	transcriptional regulator2C TetR family protein			585439	586041	603	No_hit
OKIT_0602	orf00669_AWRIB616_contig1_group1_586042_588039_len=1998	fig|336988.4.peg.614	ABC-type antimicrobial peptide transport system2C ATPase component			586042	588039	1998	YP_810096.1	peptide ABC transporter ATPase	81.35	665	123	1	1:1995	1:664	0.0	1076
OKIT_0603	orf00670_AWRIB616_contig1_group1_589421_588099_len=1323	fig|336988.4.peg.615	Macrolide-efflux protein			589421	588099	1323	No_hit
OKIT_0604	orf00671_AWRIB616_contig1_group1_589519_590544_len=1026	fig|336988.4.peg.616	Transcriptional regulator2C xre family			589519	590544	1026	No_hit
OKIT_0605	orf00672_AWRIB616_contig1_group1_591902_590541_len=1362	fig|336988.4.peg.617	D-serine/D-alanine/glycine transporter			591902	590541	1362	YP_811256.1	gamma-aminobutyrate permease or related	81.49	443	82	0	31:1359	1:443	0.0	731
OKIT_0606	orf00674_AWRIB616_contig1_group1_591968_593986_len=2019	fig|336988.4.peg.618	Methionyl-tRNA synthetase (EC 6.1.1.10);Ontology_term=KEGG_ENZYME:6.1.1.10			591968	593986	2019	YP_811255.1	methionyl-tRNA synthetase	85.48	675	95	1	1:2016	1:675	0.0	1183
OKIT_0607	orf00675_AWRIB616_contig1_group1_594487_593987_len=501	fig|336988.4.peg.619	GtrA family protein%3B MesH protein			594487	593987	501	YP_811254.1	GtcA family membrane protein	74.70	166	42	0	1:498	1:166	2e-72	263
OKIT_0608	orf00676_AWRIB616_contig1_group1_594594_595223_len=630	fig|336988.4.peg.620	Undecaprenyl-phosphate galactosephosphotransferase (EC 2.7.8.6);Ontology_term=KEGG_ENZYME:2.7.8.6			594594	595223	630	YP_811253.1	lipopolysaccharide synthesis sugar transferase	83.25	209	35	0	1:627	1:209	6e-106	375
OKIT_0609	orf00677_AWRIB616_contig1_group1_595223_595990_len=768	fig|336988.4.peg.621	glycosyltransferase			595223	595990	768	YP_811252.1	lipopolysaccharide biosynthesis	72.98	248	67	0	1:744	1:248	9e-113	398
OKIT_0610	orf00678_AWRIB616_contig1_group1_595980_597149_len=1170	fig|336988.4.peg.622	UDP-galactopyranose mutase (EC 5.4.99.9);Ontology_term=KEGG_ENZYME:5.4.99.9			595980	597149	1170	YP_811250.1	UDP-galactopyranose mutase	90.41	386	37	0	7:1164	5:390	0.0	745
OKIT_0611	orf00679_AWRIB616_contig1_group1_597262_599289_len=2028	fig|336988.4.peg.623	Phosphoglycerol transferase and related proteins2C alkaline phosphatase superfamily			597262	599289	2028	No_hit
OKIT_0612	orf00680_AWRIB616_contig1_group1_599376_600326_len=951	fig|336988.4.peg.624	Glycosyltransferase			599376	600326	951	No_hit
OKIT_0613	orf00682_AWRIB616_contig1_group1_600292_602247_len=1956	fig|336988.4.peg.625	hypothetical protein			600292	602247	1956	No_hit
OKIT_0614	orf00683_AWRIB616_contig1_group1_602258_603337_len=1080	fig|336988.4.peg.626	O-acetyltransferase			602258	603337	1080	No_hit
OKIT_0615	orf00685_AWRIB616_contig1_group1_603376_603984_len=609	fig|336988.4.peg.627	capsular polysaccharide biosynthesis protein			603376	603984	609	YP_811249.1	capsular polysaccharide biosynthesis protein	57.46	181	77	0	64:606	1:181	5e-57	212
OKIT_0616	orf00687_AWRIB616_contig1_group1_603984_605345_len=1362	fig|336988.4.peg.628	FIG00885821: hypothetical protein			603984	605345	1362	YP_811248.1	hypothetical protein	62.67	450	168	0	1:1350	1:450	8e-175	605
OKIT_0617	orf00688_AWRIB616_contig1_group1_605417_606334_len=918	fig|336988.4.peg.629	Predicted glycosyltransferase			605417	606334	918	YP_811251.1	glycosyltransferase	53.29	289	129	4	1:864	15:298	7e-76	276
OKIT_0618	orf00689_AWRIB616_contig1_group1_606372_607805_len=1434	fig|336988.4.peg.630	polysaccharide biosynthesis export protein			606372	607805	1434	YP_811244.1	PST family polysaccharide transporter	41.93	477	277	0	1:1431	1:477	6e-120	423
OKIT_0619	orf00691_AWRIB616_contig1_group1_607905_610970_len=3066	fig|336988.4.peg.631	N-acetylmuramidase			607905	610970	3066	YP_811243.1	N-acetylmuramidase	52.94	153	70	2	2548:3006	55:205	3e-37	149
OKIT_0620	orf00692_AWRIB616_contig1_group1_611077_611700_len=624	fig|336988.4.peg.632	hypothetical protein			611077	611700	624	YP_811242.1	hypothetical protein	52.20	205	90	3	25:615	8:212	4e-52	196
OKIT_0621	orf00693_AWRIB616_contig1_group1_611802_612707_len=906	fig|336988.4.peg.633	Cell envelope-associated transcriptional attenuator LytR-CpsA-Psr2C subfamily F2 (as in PMID19099556)			611802	612707	906	YP_811241.1	transcriptional regulator	69.44	301	87	3	1:903	1:296	1e-118	417
OKIT_0622	orf00694_AWRIB616_contig1_group1_612704_613108_len=405	fig|336988.4.peg.634	Cytidine deaminase (EC 3.5.4.5);Ontology_term=KEGG_ENZYME:3.5.4.5			612704	613108	405	YP_811240.1	cytidine deaminase	76.38	127	30	0	19:399	5:131	1e-54	203
OKIT_0623	orf00695_AWRIB616_contig1_group1_614102_613131_len=972	fig|336988.4.peg.635	Oxidoreductase2C N-terminal:Oxidoreductase2C C-terminal			614102	613131	972	YP_809717.1	dehydrogenase or related protein	50.95	316	155	0	1:948	1:316	3e-94	337
OKIT_0624	orf00696_AWRIB616_contig1_group1_614989_614117_len=873	fig|336988.4.peg.636	Sialic acid utilization regulator2C RpiR family			614989	614117	873	No_hit
OKIT_0625	orf00697_AWRIB616_contig1_group1_615214_616236_len=1023	fig|336988.4.peg.637	oxidoreductase2C YhhX family			615214	616236	1023	YP_809719.1	dehydrogenase or related protein	86.18	340	47	0	1:1020	1:340	2e-177	613
OKIT_0626	orf00698_AWRIB616_contig1_group1_616264_617604_len=1341	fig|336988.4.peg.638	PTS system2C cellobiose-specific IIC component (EC 2.7.1.69);Ontology_term=KEGG_ENZYME:2.7.1.69			616264	617604	1341	YP_809981.1	cellobiose-specific PTS system IIC component	43.16	431	239	4	4:1284	3:431	6e-98	350
OKIT_0627	orf00699_AWRIB616_contig1_group1_617640_618632_len=993	fig|336988.4.peg.639	NAD-dependent oxidoreductase			617640	618632	993	YP_810033.1	tRNA-Arg	29.37	303	196	10	1:882	2:295	4e-27	114
OKIT_0628	orf00700_AWRIB616_contig1_group1_618823_619878_len=1056	fig|336988.4.peg.640	N-acetyl-gamma-glutamyl-phosphate reductase (EC 1.2.1.38);Ontology_term=KEGG_ENZYME:1.2.1.38			618823	619878	1056	No_hit
OKIT_0629	orf00702_AWRIB616_contig1_group1_619895_621076_len=1182	fig|336988.4.peg.641	Glutamate N-acetyltransferase (EC 2.3.1.35) / N-acetylglutamate synthase (EC 2.3.1.1);Ontology_term=KEGG_ENZYME:2.3.1.35,KEGG_ENZYME:2.3.1.1			619895	621076	1182	No_hit
OKIT_0630	orf00703_AWRIB616_contig1_group1_621086_622246_len=1161	fig|336988.4.peg.642	Acetylornithine aminotransferase (EC 2.6.1.11);Ontology_term=KEGG_ENZYME:2.6.1.11			621086	622246	1161	YP_810017.1	4-aminobutyrate aminotransferase	28.75	407	249	9	55:1152	35:441	2e-39	155
OKIT_0631	orf00704_AWRIB616_contig1_group1_622243_623256_len=1014	fig|336988.4.peg.643	Ornithine carbamoyltransferase (EC 2.1.3.3);Ontology_term=KEGG_ENZYME:2.1.3.3			622243	623256	1014	No_hit
OKIT_0632	orf00705_AWRIB616_contig1_group1_623253_624326_len=1074	fig|336988.4.peg.644	Carbamoyl-phosphate synthase small chain (EC 6.3.5.5);Ontology_term=KEGG_ENZYME:6.3.5.5			623253	624326	1074	YP_809907.1	carbamoyl-phosphate synthase small subunit	58.19	354	147	1	1:1059	2:355	8e-118	415
OKIT_0633	orf00706_AWRIB616_contig1_group1_624340_627522_len=3183	fig|336988.4.peg.645	Carbamoyl-phosphate synthase large chain (EC 6.3.5.5);Ontology_term=KEGG_ENZYME:6.3.5.5			624340	627522	3183	YP_809908.1	carbamoyl-phosphate synthase large subunit	63.43	1050	370	5	7:3114	2:1051	0.0	1281
OKIT_0634	orf00707_AWRIB616_contig1_group1_627515_628381_len=867	fig|336988.4.peg.646	Acetylglutamate kinase (EC 2.7.2.8);Ontology_term=KEGG_ENZYME:2.7.2.8			627515	628381	867	No_hit
OKIT_0635	orf00708_AWRIB616_contig1_group1_628463_629710_len=1248	fig|336988.4.peg.647	Ammonium transporter			628463	629710	1248	YP_811193.1	ammonia permease	78.48	409	88	0	1:1227	1:409	0.0	662
OKIT_0636	orf00710_AWRIB616_contig1_group1_629854_631149_len=1296,orf00711_AWRIB616_contig1_group1_631119_631592_len=474	fig|336988.4.peg.648	Multidrug resistance ABC transporter ATP-binding and permease protein			629854	631592	1296,474	YP_810879.1,YP_810879.1		25.13,53.25	398,154	289,72	3,0	7:1179,1:462	19:414,444:597	1e-56,3e-45	189,172
OKIT_0638	orf00712_AWRIB616_contig1_group1_632730_631621_len=1110	fig|336988.4.peg.650	drug resistance transporter2C EmrB/QacA family			632730	631621	1110	YP_811350.1	major facilitator superfamily permease	34.15	369	221	8	16:1077	99:460	2e-54	204
OKIT_0639	orf00713_AWRIB616_contig1_group1_633618_633433_len=186	fig|336988.4.peg.651	hypothetical protein			633618	633433	186	No_hit
OKIT_0640	orf00714_AWRIB616_contig1_group1_633896_634051_len=156	fig|336988.4.peg.652	hypothetical protein			633896	634051	156	No_hit
OKIT_0641	orf00715_AWRIB616_contig1_group1_634096_634566_len=471	fig|336988.4.peg.653	hypothetical protein			634096	634566	471	No_hit
OKIT_0642	orf00716_AWRIB616_contig1_group1_634796_635074_len=279	fig|336988.4.peg.654	hypothetical protein	toxin-antitoxin system, antitoxin component RelB family	Toxin	634796	635074	279	No_hit
OKIT_0643	orf00717_AWRIB616_contig1_group1_635064_635366_len=303	fig|336988.4.peg.655	hypothetical protein	addiction module toxin RelE family	Toxin	635064	635366	303	No_hit
OKIT_0644	orf00718_AWRIB616_contig1_group1_635543_636412_len=870	fig|336988.4.peg.656	Transcriptional regulator2C xre family			635543	636412	870	YP_809849.1	XRE family transcriptional regulator	29.39	279	194	2	19:852	8:284	1e-33	135
OKIT_0645	orf00719_AWRIB616_contig1_group1_636489_637235_len=747	fig|336988.4.peg.657	hypothetical protein			636489	637235	747	No_hit
OKIT_0646	orf00720_AWRIB616_contig1_group1_637229_637693_len=465	fig|336988.4.peg.658	hypothetical protein			637229	637693	465	No_hit
OKIT_0647	orf00721_AWRIB616_contig1_group1_637695_638384_len=690	fig|336988.4.peg.659	ABC transporter ATP-binding protein			637695	638384	690	YP_810336.1	ABC-type multidrug transport system, ATPase	30.77	221	147	3	4:654	4:222	2e-30	124
OKIT_0648	orf00722_AWRIB616_contig1_group1_638381_639502_len=1122	fig|336988.4.peg.660	hypothetical protein			638381	639502	1122	No_hit
OKIT_0649	orf00723_AWRIB616_contig1_group1_640292_640771_len=480	fig|336988.4.peg.661	hypothetical protein			640292	640771	480	No_hit
OKIT_0650	orf00724_AWRIB616_contig1_group1_640994_641737_len=744	fig|336988.4.peg.662	putative peptidoglycan binding domain protein			640994	641737	744	No_hit
OKIT_0651	orf00725_AWRIB616_contig1_group1_641768_642457_len=690	fig|336988.4.peg.663	hypothetical protein			641768	642457	690	No_hit
OKIT_0652	orf00726_AWRIB616_contig1_group1_642473_643144_len=672	fig|336988.4.peg.664	hypothetical protein			642473	643144	672	No_hit
OKIT_0653	orf00728_AWRIB616_contig1_group1_644158_643445_len=714	fig|336988.4.peg.665	hypothetical protein			644158	643445	714	No_hit
OKIT_0654	orf00730_AWRIB616_contig1_group1_644525_644253_len=273	fig|336988.4.peg.666	hypothetical protein			644525	644253	273	No_hit
OKIT_0655	orf00731_AWRIB616_contig1_group1_645988_644594_len=1395	fig|336988.4.peg.667	ABC transporter ATPase and permease components			645988	644594	1395	YP_810038.1	cytochrome bd biosynthesis ABC-type transporter,	23.27	447	322	10	85:1380	128:568	2e-23	102
OKIT_0656	orf00732_AWRIB616_contig1_group1_646210_646043_len=168	fig|336988.4.peg.668	hypothetical protein			646210	646043	168	No_hit
OKIT_0657	orf00733_AWRIB616_contig1_group1_647582_646371_len=1212	fig|336988.4.peg.669	Transcriptional regulator2C GntR family / Aspartate aminotransferase (EC 2.6.1.1);Ontology_term=KEGG_ENZYME:2.6.1.1			647582	646371	1212	YP_810035.1	aminotransferase	70.71	396	116	0	1:1188	1:396	6e-166	575
OKIT_0658	orf00734_AWRIB616_contig1_group1_647724_648617_len=894	fig|336988.4.peg.670	Cys regulon transcriptional activator CysB			647724	648617	894	YP_810036.1	transcriptional regulator	80.27	294	58	0	1:882	1:294	1e-136	477
OKIT_0659	orf00735_AWRIB616_contig1_group1_649360_648668_len=693	fig|336988.4.peg.671	32C4-dihydroxy-2-butanone 4-phosphate synthase / GTP cyclohydrolase II (EC 3.5.4.25);Ontology_term=KEGG_ENZYME:3.5.4.25			649360	648668	693	No_hit
OKIT_0660	orf00736_AWRIB616_contig1_group1_649539_650162_len=624	fig|336988.4.peg.672	Galactoside O-acetyltransferase (EC 2.3.1.18);Ontology_term=KEGG_ENZYME:2.3.1.18			649539	650162	624	No_hit
OKIT_0661	orf00737_AWRIB616_contig1_group1_650558_651211_len=654	fig|336988.4.peg.673	ABC transporter2C ATP-binding protein			650558	651211	654	No_hit
OKIT_0662	orf00739_AWRIB616_contig1_group1_651168_652544_len=1377	fig|336988.4.peg.674	hypothetical protein			651168	652544	1377	No_hit
OKIT_0663	orf00740_AWRIB616_contig1_group1_652541_652804_len=264	fig|336988.4.peg.675	hypothetical protein			652541	652804	264	No_hit
OKIT_0664	orf00741_AWRIB616_contig1_group1_652906_653172_len=267	fig|336988.4.peg.676	hypothetical protein			652906	653172	267	No_hit
OKIT_0665	orf00742_AWRIB616_contig1_group1_653172_653690_len=519	fig|336988.4.peg.677	transporter accessory protein2C putative	putative bacteriocin transport accessory protein	Bacteriocin	653172	653690	519	No_hit
OKIT_0666	orf00744_AWRIB616_contig1_group1_653699_654745_len=1047	fig|336988.4.peg.678	hypothetical protein			653699	654745	1047	No_hit
OKIT_0667	orf00745_AWRIB616_contig1_group1_655888_654767_len=1122	fig|336988.4.peg.679	A/G-specific adenine glycosylase (EC 3.2.2.-);Ontology_term=KEGG_ENZYME:3.2.2.-			655888	654767	1122	No_hit
OKIT_0668	orf00746_AWRIB616_contig1_group1_656746_656000_len=747	fig|336988.4.peg.680	ABC-type polar amino acid transport system2C ATPase component			656746	656000	747	YP_810346.1	ABC-type polar amino acid transport system,	82.66	248	43	0	1:744	1:248	5e-118	415
OKIT_0669	orf00747_AWRIB616_contig1_group1_658357_656753_len=1605	fig|336988.4.peg.681	ABC-type amino acid transport system2C permease component			658357	656753	1605	YP_810347.1	ABC-type amino acid transport system, permease	80.71	534	101	1	1:1602	11:542	0.0	847
OKIT_0670	orf00748_AWRIB616_contig1_group1_658779_659066_len=288	fig|336988.4.peg.682	FIG00885646: hypothetical protein			658779	659066	288	YP_809889.1	hypothetical protein	84.21	95	15	0	1:285	1:95	7e-43	163
OKIT_0671	orf00749_AWRIB616_contig1_group1_660110_659112_len=999	fig|336988.4.peg.683	HoxN/HupN/NixA family nickel/cobalt transporter			660110	659112	999	No_hit
OKIT_0672	orf00750_AWRIB616_contig1_group1_660756_660184_len=573	fig|336988.4.peg.684	Ribonucleotide reductase of class III (anaerobic)2C activating protein (EC 1.97.1.4);Ontology_term=KEGG_ENZYME:1.97.1.4			660756	660184	573	YP_810679.1	ribonucleoside-triphosphate reductase class III	78.49	186	40	0	13:570	21:206	4e-88	315
OKIT_0673	orf00751_AWRIB616_contig1_group1_662925_660757_len=2169	fig|336988.4.peg.685	Ribonucleotide reductase of class III (anaerobic)2C large subunit (EC 1.17.4.2);Ontology_term=KEGG_ENZYME:1.17.4.2			662925	660757	2169	YP_810680.1	anaerobic ribonucleoside triphosphate reductase	66.52	699	229	3	70:2160	29:724	0.0	975
OKIT_0674	orf00753_AWRIB616_contig1_group1_663176_664021_len=846	fig|336988.4.peg.686	Iron-sulfur cluster assembly ATPase protein SufC			663176	664021	846	YP_810678.1	Fe-S cluster assembly ABC-type transport system,	67.32	257	78	1	1:771	1:251	4e-95	339
OKIT_0675	orf00754_AWRIB616_contig1_group1_663996_665267_len=1272	fig|336988.4.peg.687	Iron-sulfur cluster assembly protein SufD			663996	665267	1272	YP_810677.1	Fe-S cluster assembly ABC-type transport system,	40.50	321	183	5	253:1209	86:400	1e-55	209
OKIT_0676	orf00755_AWRIB616_contig1_group1_665260_666498_len=1239	fig|336988.4.peg.688	Cysteine desulfurase (EC 2.8.1.7)2C SufS subfamily;Ontology_term=KEGG_ENZYME:2.8.1.7			665260	666498	1239	YP_810676.1	cysteine sulfinate desulfinase/cysteine	49.26	404	204	1	16:1224	4:407	2e-119	421
OKIT_0677	orf00757_AWRIB616_contig1_group1_666485_666940_len=456	fig|336988.4.peg.689	Putative iron-sulfur cluster assembly scaffold protein for SUF system2C SufE2			666485	666940	456	YP_810674.1	Fe-S cluster formation protein, NifU-like	40.14	142	83	1	1:426	1:140	2e-27	113
OKIT_0678	orf00758_AWRIB616_contig1_group1_666933_668336_len=1404	fig|336988.4.peg.690	Iron-sulfur cluster assembly protein SufB			666933	668336	1404	YP_810675.1	Fe-S cluster assembly ABC-type transport system,	75.65	464	111	1	10:1401	1:462	0.0	718
OKIT_0679	orf00759_AWRIB616_contig1_group1_668346_668672_len=327	fig|336988.4.peg.691	probably aromatic ring hydroxylating enzyme2C evidenced by COGnitor%3B PaaD-like protein (DUF59) involved in Fe-S cluster assembly			668346	668672	327	No_hit
OKIT_0680	orf00760_AWRIB616_contig1_group1_669595_668669_len=927	fig|336988.4.peg.692	Transcriptional regulator2C xre family			669595	668669	927	No_hit
OKIT_0681	orf00761_AWRIB616_contig1_group1_670639_670055_len=585	fig|336988.4.peg.693	Phosphoglycerate mutase family 2			670639	670055	585	No_hit
OKIT_0682	orf00762_AWRIB616_contig1_group1_671189_670665_len=525	fig|336988.4.peg.694	2-5 RNA ligase			671189	670665	525	No_hit
OKIT_0683	orf00763_AWRIB616_contig1_group1_671339_672238_len=900	fig|336988.4.peg.695	Proline iminopeptidase (EC 3.4.11.5);Ontology_term=KEGG_ENZYME:3.4.11.5			671339	672238	900	YP_809890.1	alpha/beta fold family hydrolase	71.13	291	84	0	1:873	1:291	3e-128	450
OKIT_0684	orf00765_AWRIB616_contig1_group1_672264_673241_len=978	fig|336988.4.peg.696	MSM (multiple sugar metabolism) operon regulatory protein			672264	673241	978	YP_809805.1	LacI family transcription regulator	24.55	330	220	7	7:942	6:324	1e-23	102
OKIT_0685	orf00766_AWRIB616_contig1_group1_673362_674660_len=1299	fig|336988.4.peg.697	Multiple sugar ABC transporter2C substrate-binding protein			673362	674660	1299	No_hit
OKIT_0686	orf00767_AWRIB616_contig1_group1_674733_675620_len=888	fig|336988.4.peg.698	Multiple sugar ABC transporter2C membrane-spanning permease protein MsmF			674733	675620	888	YP_810983.1	ABC-type sugar transport system, permease	34.38	288	182	3	4:855	26:310	3e-42	164
OKIT_0687	orf00768_AWRIB616_contig1_group1_675613_676464_len=852	fig|336988.4.peg.699	Multiple sugar ABC transporter2C membrane-spanning permease protein MsmG			675613	676464	852	YP_809903.1	ABC-type maltose transport system, permease	27.86	280	195	3	1:837	1:274	5e-38	150
OKIT_0688	orf00769_AWRIB616_contig1_group1_676461_677846_len=1386	fig|336988.4.peg.700	Sucrose-6-phosphate hydrolase (EC 3.2.1.26);Ontology_term=KEGG_ENZYME:3.2.1.26			676461	677846	1386	No_hit
OKIT_0689	orf00770_AWRIB616_contig1_group1_678532_678005_len=528	fig|336988.4.peg.701	TetR family HTH transcriptional regulator			678532	678005	528	No_hit
OKIT_0690	orf00771_AWRIB616_contig1_group1_678646_678873_len=228	fig|336988.4.peg.702	FIG00753257: hypothetical protein			678646	678873	228	No_hit
OKIT_0691	orf00772_AWRIB616_contig1_group1_678860_679231_len=372	fig|336988.4.peg.703	hypothetical protein			678860	679231	372	No_hit
OKIT_0692	orf00774_AWRIB616_contig1_group1_679945_679328_len=618	fig|336988.4.peg.704	Maltose O-acetyltransferase (EC 2.3.1.79);Ontology_term=KEGG_ENZYME:2.3.1.79			679945	679328	618	No_hit
OKIT_0693	orf00775_AWRIB616_contig1_group1_680415_680957_len=543	fig|336988.4.peg.706	hypothetical protein			680415	680957	543	No_hit
OKIT_0694	orf00776_AWRIB616_contig1_group1_680961_682451_len=1491	fig|336988.4.peg.707	hypothetical protein			680961	682451	1491	No_hit
OKIT_0695	orf00777_AWRIB616_contig1_group1_682444_683034_len=591	fig|336988.4.peg.708	ATP-binding cassette sub-family A member 10			682444	683034	591	No_hit
OKIT_0696	orf00779_AWRIB616_contig1_group1_683278_684849_len=1572	fig|336988.4.peg.710	ABC transporter ATP-binding and membrane spanning permease			683278	684849	1572	YP_811151.1	ABC-type multidrug transport system, ATPase and	22.71	502	366	12	58:1512	82:578	2e-29	122
OKIT_0697	orf00780_AWRIB616_contig1_group1_684965_685726_len=762	fig|336988.4.peg.711	Glucose 1-dehydrogenase (EC 1.1.1.47);Ontology_term=KEGG_ENZYME:1.1.1.47			684965	685726	762	YP_809891.1	Short-chain alcohol dehydrogenase	86.17	253	35	0	1:759	1:253	4e-128	449
OKIT_0698	orf00781_AWRIB616_contig1_group1_685852_686121_len=270	fig|336988.4.peg.712	hypothetical protein			685852	686121	270	No_hit
OKIT_0699	orf00782_AWRIB616_contig1_group1_687165_686248_len=918	fig|336988.4.peg.713	Aryl-alcohol dehydrogenase related enzyme			687165	686248	918	YP_809892.1	Aryl-alcohol dehydrogenase related enzyme	67.87	305	98	0	1:915	1:305	2e-119	421
OKIT_0700	orf00783_AWRIB616_contig1_group1_687348_688172_len=825	fig|336988.4.peg.714	Dehydrogenases with different specificities (related to short-chain alcohol dehydrogenases)			687348	688172	825	YP_810302.1	Short-chain alcohol dehydrogenase	39.48	271	162	2	10:822	8:276	2e-50	191
OKIT_0701	orf00785_AWRIB616_contig1_group1_688833_688216_len=618	fig|336988.4.peg.715	Predicted dinucleotide-binding enzyme			688833	688216	618	YP_809893.1	dinucleotide-binding protein	55.61	205	90	1	1:612	1:205	5e-61	226
OKIT_0702	orf00786_AWRIB616_contig1_group1_690537_688939_len=1599	fig|336988.4.peg.716	ABC transporter ATP-binding/membrane spanning protein - multidrug resistance			690537	688939	1599	YP_810906.1_YP_810879.1		23.55	484	343	10	148:1551	97:569	3e-33	135
OKIT_0703	orf00787_AWRIB616_contig1_group1_690828_692453_len=1626	fig|336988.4.peg.717	ABC-type multidrug transport system2C ATPase and permease component			690828	692453	1626	YP_810039.1	cytochrome bd biosynthesis ABC-type transporter,	24.04	545	390	11	13:1599	7:543	8e-33	134
OKIT_0704	orf00789_AWRIB616_contig1_group1_693980_692592_len=1389	fig|336988.4.peg.718	D-serine/D-alanine/glycine transporter			693980	692592	1389	YP_811256.1	gamma-aminobutyrate permease or related	53.72	443	203	1	37:1365	2:442	8e-143	499
OKIT_0705	orf00790_AWRIB616_contig1_group1_694342_694986_len=645	fig|336988.4.peg.719	Saccharopine dehydrogenase related protein			694342	694986	645	YP_811164.1	saccharopine dehydrogenase or related protein	36.06	208	119	6	13:618	3:202	5e-27	113
OKIT_0706	orf00791_AWRIB616_contig1_group1_695205_696386_len=1182	fig|336988.4.peg.720	NADH-dependent oxidoreductase			695205	696386	1182	YP_810131.1	NADH:flavin oxidoreductase	37.04	351	208	6	43:1089	14:353	6e-54	203
OKIT_0707	orf00792_AWRIB616_contig1_group1_696527_697861_len=1335	fig|336988.4.peg.721	Manganese transport protein MntH			696527	697861	1335	YP_809895.1	manganese transporter NRAMP	82.17	443	79	0	1:1329	1:443	0.0	717
OKIT_0708	orf00793_AWRIB616_contig1_group1_697926_698519_len=594	fig|336988.4.peg.722	GTP-binding protein EngB			697926	698519	594	YP_809896.1	GTPase	79.38	194	40	0	1:582	1:194	3e-87	313
OKIT_0709	orf00794_AWRIB616_contig1_group1_700454_698547_len=1908	fig|336988.4.peg.723	Glycogen debranching enzyme (EC 3.2.1.-) / Pullulanase (EC 3.2.1.41);Ontology_term=KEGG_ENZYME:3.2.1.-,KEGG_ENZYME:3.2.1.41			700454	698547	1908	No_hit
OKIT_0710	orf00795_AWRIB616_contig1_group1_702124_700451_len=1674	fig|336988.4.peg.724	Alpha-glucosidase (EC 3.2.1.20);Ontology_term=KEGG_ENZYME:3.2.1.20			702124	700451	1674	YP_809709.1	glucosidase	38.93	560	320	10	19:1659	4:554	8e-118	416
OKIT_0711	orf00796_AWRIB616_contig1_group1_703927_702125_len=1803	fig|336988.4.peg.725	Neopullulanase (EC 3.2.1.135);Ontology_term=KEGG_ENZYME:3.2.1.135			703927	702125	1803	YP_809709.1	glucosidase	25.13	398	215	15	409:1431	5:376	3e-23	102
OKIT_0712	orf00797_AWRIB616_contig1_group1_705036_703927_len=1110	fig|336988.4.peg.726	Maltose/maltodextrin transport ATP-binding protein MalK (EC 3.6.3.19)%3B Multiple sugar ABC transporter2C ATP-binding protein;Ontology_term=KEGG_ENZYME:3.6.3.19			705036	703927	1110	YP_811166.1	ABC-type sugar transport system, ATPase	54.02	361	164	2	1:1080	1:360	3e-110	390
OKIT_0713	orf00798_AWRIB616_contig1_group1_705244_706458_len=1215	fig|336988.4.peg.727	Maltose/maltodextrin ABC transporter2C substrate binding periplasmic protein MalE			705244	706458	1215	No_hit
OKIT_0714	orf00799_AWRIB616_contig1_group1_706464_707894_len=1431	fig|336988.4.peg.728	Maltose/maltodextrin ABC transporter2C permease protein MalF			706464	707894	1431	YP_809902.1	ABC-type sugar transport system, permease	23.86	306	212	5	520:1428	21:308	4e-21	95.1
OKIT_0715	orf00800_AWRIB616_contig1_group1_707894_708739_len=846	fig|336988.4.peg.729	Maltose/maltodextrin ABC transporter2C permease protein MalG			707894	708739	846	YP_809903.1	ABC-type maltose transport system, permease	30.47	279	180	8	1:822	1:270	2e-28	118
OKIT_0716	orf00801_AWRIB616_contig1_group1_708747_709250_len=504	fig|336988.4.peg.730	Maltose operon transcriptional repressor MalR2C LacI family			708747	709250	504	No_hit
OKIT_0717	orf00802_AWRIB616_contig1_group1_709240_709743_len=504	fig|336988.4.peg.731	Transcriptional regulator			709240	709743	504	No_hit
OKIT_0718	orf00803_AWRIB616_contig1_group1_709756_712002_len=2247	fig|336988.4.peg.732	Maltose phosphorylase (EC 2.4.1.8) / Trehalose phosphorylase (EC 2.4.1.64);Ontology_term=KEGG_ENZYME:2.4.1.8,KEGG_ENZYME:2.4.1.64			709756	712002	2247	No_hit
OKIT_0719	orf00804_AWRIB616_contig1_group1_712091_712324_len=234	fig|336988.4.peg.733	hypothetical protein			712091	712324	234	YP_809904.1	hypothetical protein	59.21	76	31	0	1:228	1:76	5e-22	94.4
OKIT_0720	orf00805_AWRIB616_contig1_group1_712589_713512_len=924	fig|336988.4.peg.735	Aspartate carbamoyltransferase (EC 2.1.3.2);Ontology_term=KEGG_ENZYME:2.1.3.2			712589	713512	924	YP_809905.1	aspartate carbamoyltransferase catalytic	75.33	300	74	0	1:900	1:300	3e-129	453
OKIT_0721	orf00806_AWRIB616_contig1_group1_713514_714809_len=1296	fig|336988.4.peg.736	Dihydroorotase (EC 3.5.2.3);Ontology_term=KEGG_ENZYME:3.5.2.3			713514	714809	1296	YP_809906.1	dihydroorotase	70.35	425	126	0	1:1275	1:425	5e-174	602
OKIT_0722	orf00807_AWRIB616_contig1_group1_714806_715897_len=1092	fig|336988.4.peg.737	Carbamoyl-phosphate synthase small chain (EC 6.3.5.5);Ontology_term=KEGG_ENZYME:6.3.5.5			714806	715897	1092	YP_809907.1	carbamoyl-phosphate synthase small subunit	68.98	361	112	0	1:1083	1:361	1e-148	518
OKIT_0723	orf00808_AWRIB616_contig1_group1_715881_718442_len=2562,orf00809_AWRIB616_contig1_group1_718461_719078_len=618	fig|336988.4.peg.738	Carbamoyl-phosphate synthase large chain (EC 6.3.5.5);Ontology_term=KEGG_ENZYME:6.3.5.5			715881	719078	2562,618	YP_809908.1,YP_809908.1		75.03,71.00	853,200	213,58	0,0	1:2559,1:600	1:853,861:1060	0.0,3e-76	1291,276
OKIT_0725	orf00810_AWRIB616_contig1_group1_719075_719773_len=699	fig|336988.4.peg.740	Orotidine 5-phosphate decarboxylase (EC 4.1.1.23);Ontology_term=KEGG_ENZYME:4.1.1.23			719075	719773	699	YP_809909.1	orotidine-5-phosphate decarboxylase	58.04	224	93	1	22:693	5:227	4e-67	246
OKIT_0726	orf00811_AWRIB616_contig1_group1_719770_720405_len=636	fig|336988.4.peg.741	Orotate phosphoribosyltransferase (EC 2.4.2.10);Ontology_term=KEGG_ENZYME:2.4.2.10			719770	720405	636	YP_809910.1	orotate phosphoribosyltransferase	62.38	210	79	0	1:630	1:210	3e-75	273
OKIT_0727	orf00813_AWRIB616_contig1_group1_720418_721365_len=948	fig|336988.4.peg.742	Dihydroorotate dehydrogenase2C catalytic subunit (EC 1.3.3.1);Ontology_term=KEGG_ENZYME:1.3.3.1			720418	721365	948	YP_809911.1	dihydroorotate dehydrogenase 1A	70.23	309	92	0	1:927	1:309	3e-126	443
OKIT_0728	orf00814_AWRIB616_contig1_group1_721386_722645_len=1260	fig|336988.4.peg.743	major facilitator superfamily MFS_1			721386	722645	1260	YP_809912.1	major facilitator superfamily permease	81.53	417	76	1	1:1251	1:416	0.0	700
OKIT_0729	orf00816_AWRIB616_contig1_group1_722790_723548_len=759	fig|336988.4.peg.744	hypothetical protein			722790	723548	759	No_hit
OKIT_0730	orf00817_AWRIB616_contig1_group1_723551_724246_len=696	fig|336988.4.peg.745	ABC-type cobalt transport system2C ATPase component			723551	724246	696	No_hit
OKIT_0731	orf00818_AWRIB616_contig1_group1_724337_724756_len=420	fig|336988.4.peg.746	transcriptional regulator2C MarR family			724337	724756	420	YP_810118.1	transcriptional regulator	73.38	139	37	0	1:417	1:139	1e-55	207
OKIT_0732	orf00819_AWRIB616_contig1_group1_724753_725658_len=906	fig|336988.4.peg.747	Cobalt-zinc-cadmium resistance protein			724753	725658	906	No_hit
OKIT_0733	orf00820_AWRIB616_contig1_group1_726096_726329_len=234	fig|336988.4.peg.748	hypothetical protein			726096	726329	234	No_hit
OKIT_0734	orf00821_AWRIB616_contig1_group1_726496_727758_len=1263	fig|336988.4.peg.749	permease of the major facilitator superfamily			726496	727758	1263	YP_810304.1	major facilitator superfamily permease	23.82	340	244	7	133:1113	49:386	2e-25	108
OKIT_0735	orf00823_AWRIB616_contig1_group1_728648_727779_len=870	fig|336988.4.peg.750	2-hydroxy-3-oxopropionate reductase (EC 1.1.1.60);Ontology_term=KEGG_ENZYME:1.1.1.60			728648	727779	870	YP_809913.1	3-hydroxyisobutyrate dehydrogenase or related	80.97	289	55	0	1:867	1:289	2e-135	473
OKIT_0736	orf00824_AWRIB616_contig1_group1_728933_729958_len=1026	fig|336988.4.peg.751	ABC transporter substrate-binding protein			728933	729958	1026	YP_809914.1	ABC-type uncharacterized transport system,	73.68	342	86	2	1:1023	21:359	6e-140	489
OKIT_0737	orf00826_AWRIB616_contig1_group1_729955_730851_len=897	fig|336988.4.peg.752	ABC transporter permease protein			729955	730851	897	YP_809915.1	ribose/xylose/arabinose/galactoside ABC-type	78.50	293	63	0	1:879	1:293	3e-130	456
OKIT_0738	orf00827_AWRIB616_contig1_group1_730844_731620_len=777	fig|336988.4.peg.753	ABC transporter ATP-binding protein			730844	731620	777	YP_809916.1	ABC-type uncharacterized transport system,	75.29	255	63	0	10:774	2:256	8e-109	385
OKIT_0739	orf00828_AWRIB616_contig1_group1_731695_732258_len=564	fig|336988.4.peg.754	hypothetical protein			731695	732258	564	YP_811087.1	hypothetical protein	55.56	180	80	0	19:558	2:181	2e-59	220
OKIT_0740	orf00829_AWRIB616_contig1_group1_732366_733019_len=654	fig|336988.4.peg.755	Aquaporin Z			732366	733019	654	No_hit
OKIT_0741	orf00830_AWRIB616_contig1_group1_733217_733047_len=171	fig|336988.4.peg.756	hypothetical protein			733217	733047	171	No_hit
OKIT_0742	orf00831_AWRIB616_contig1_group1_735175_733367_len=1809	fig|336988.4.peg.757	Oligoendopeptidase F			735175	733367	1809	YP_809926.1	oligoendopeptidase F	81.33	600	112	0	1:1800	1:600	0.0	999
OKIT_0743	orf00832_AWRIB616_contig1_group1_736533_735229_len=1305	fig|336988.4.peg.758	RNA polymerase sigma-54 factor RpoN			736533	735229	1305	No_hit
OKIT_0744	orf00833_AWRIB616_contig1_group1_736896_736678_len=219	fig|336988.4.peg.759	hypothetical protein			736896	736678	219	No_hit
OKIT_0745	orf00834_AWRIB616_contig1_group1_737061_737459_len=399	fig|336988.4.peg.760	hypothetical protein			737061	737459	399	No_hit
OKIT_0746	orf00836_AWRIB616_contig1_group1_737476_740301_len=2826	fig|336988.4.peg.761	NtrC family Transcriptional regulator2C ATPase domain			737476	740301	2826	No_hit
OKIT_0747	orf00838_AWRIB616_contig1_group1_740430_740867_len=438	fig|336988.4.peg.762	PTS system2C mannose-specific IIA component (EC 2.7.1.69) / PTS system2C mannose-specific IIB component (EC 2.7.1.69);Ontology_term=KEGG_ENZYME:2.7.1.69,KEGG_ENZYME:2.7.1.69			740430	740867	438	No_hit
OKIT_0748	orf00839_AWRIB616_contig1_group1_740864_741349_len=486	fig|336988.4.peg.763	PTS system2C mannose-specific IIB component (EC 2.7.1.69) / PTS system2C fructose-specific IIB component (EC 2.7.1.69);Ontology_term=KEGG_ENZYME:2.7.1.69,KEGG_ENZYME:2.7.1.69			740864	741349	486	YP_810086.1	phosphotransferase system,	35.44	158	102	0	1:474	163:320	3e-30	123
OKIT_0749	orf00841_AWRIB616_contig1_group1_741365_742192_len=828	fig|336988.4.peg.764	PTS system2C mannose-specific IIC component (EC 2.7.1.69) / PTS system2C fructose-specific IIC component (EC 2.7.1.69);Ontology_term=KEGG_ENZYME:2.7.1.69,KEGG_ENZYME:2.7.1.69			741365	742192	828	YP_810087.1	mannose-specific PTS system component IIC	45.49	277	140	2	1:822	1:269	1e-63	234
OKIT_0750	orf00842_AWRIB616_contig1_group1_742204_743037_len=834	fig|336988.4.peg.765	PTS system2C mannose-specific IID component (EC 2.7.1.69) / PTS system2C fructose-specific IID component (EC 2.7.1.69);Ontology_term=KEGG_ENZYME:2.7.1.69,KEGG_ENZYME:2.7.1.69			742204	743037	834	YP_810088.1	mannose-specific PTS system component IID	44.67	300	132	2	31:828	5:304	2e-72	264
OKIT_0751	orf00844_AWRIB616_contig1_group1_743081_744364_len=1284	fig|336988.4.peg.766	FIG00886137: hypothetical protein			743081	744364	1284	YP_809927.1	cellobiose-specific PTS system IIC component	50.62	405	192	4	73:1281	3:401	7e-111	392
OKIT_0752	orf00845_AWRIB616_contig1_group1_744351_745208_len=858	fig|336988.4.peg.767	alpha/beta hydrolase superfamily protein			744351	745208	858	YP_809928.1	alpha/beta hydrolase superfamily protein	71.48	270	77	0	1:810	1:270	2e-114	404
OKIT_0753	orf00846_AWRIB616_contig1_group1_745261_745431_len=171	fig|336988.4.peg.768	hypothetical protein			745261	745431	171	No_hit
OKIT_0754	orf00847_AWRIB616_contig1_group1_745441_746967_len=1527	fig|336988.4.peg.769	D-alanine--poly(phosphoribitol) ligase subunit 1 (EC 6.1.1.13);Ontology_term=KEGG_ENZYME:6.1.1.13			745441	746967	1527	No_hit
OKIT_0755	orf00848_AWRIB616_contig1_group1_746960_748189_len=1230	fig|336988.4.peg.770	D-alanyl transfer protein DltB			746960	748189	1230	YP_809930.1	D-alanyl carrier protein	78.73	409	87	0	1:1227	1:409	0.0	691
OKIT_0756	orf00849_AWRIB616_contig1_group1_748200_748433_len=234	fig|336988.4.peg.771	D-alanine--poly(phosphoribitol) ligase subunit 2 (EC 6.1.1.13);Ontology_term=KEGG_ENZYME:6.1.1.13			748200	748433	234	YP_809931.1	D-alanyl transfer protein	76.62	77	18	0	1:231	1:77	3e-31	125
OKIT_0757	orf00850_AWRIB616_contig1_group1_748433_749722_len=1290	fig|336988.4.peg.772	Poly(glycerophosphate chain) D-alanine transfer protein DltD			748433	749722	1290	YP_809932.1	D-alanine-activating enzyme	66.19	417	141	0	1:1251	1:417	7e-167	578
OKIT_0758	orf00852_AWRIB616_contig1_group1_750217_749771_len=447	fig|336988.4.peg.773	heat shock protein Hsp20			750217	749771	447	YP_809933.1	heat shock protein Hsp20	74.32	148	38	0	1:444	1:148	1e-63	234
OKIT_0759	orf00853_AWRIB616_contig1_group1_750384_753854_len=3471	fig|336988.4.peg.774	ATP-dependent nuclease2C subunit B			750384	753854	3471	YP_809949.1	DNA helicase/exodeoxyribonuclease V, subunit B	60.28	1158	456	2	1:3462	1:1158	0.0	1423
OKIT_0760	orf00854_AWRIB616_contig1_group1_753851_757429_len=3579	fig|336988.4.peg.775	ATP-dependent nuclease2C subunit A			753851	757429	3579	YP_809950.1	DNA helicase/exodeoxyribonuclease V, subunit A	63.21	1196	426	4	1:3576	1:1186	0.0	1515
OKIT_0761	orf00855_AWRIB616_contig1_group1_757747_758955_len=1209	fig|336988.4.peg.776	Tryptophan synthase beta chain (EC 4.2.1.20);Ontology_term=KEGG_ENZYME:4.2.1.20			757747	758955	1209	No_hit
OKIT_0762	orf00856_AWRIB616_contig1_group1_759087_761312_len=2226	fig|336988.4.peg.777	Alpha-galactosidase (EC 3.2.1.22);Ontology_term=KEGG_ENZYME:3.2.1.22			759087	761312	2226	YP_811285.1	Alpha-galactosidase	43.96	712	390	4	7:2133	2:707	2e-177	615
OKIT_0763	orf00857_AWRIB616_contig1_group1_761374_761529_len=156	fig|336988.4.peg.778	hypothetical protein			761374	761529	156	No_hit
OKIT_0764	orf00858_AWRIB616_contig1_group1_762929_761526_len=1404	fig|336988.4.peg.779	lincomycin-resistance			762929	761526	1404	YP_810460.1	major facilitator superfamily permease	31.26	467	308	3	31:1392	16:482	4e-68	251
OKIT_0765	orf00859_AWRIB616_contig1_group1_763371_762952_len=420	fig|336988.4.peg.780	transcription regulator (putative)			763371	762952	420	No_hit
OKIT_0766	orf00860_AWRIB616_contig1_group1_763471_764163_len=693	fig|336988.4.peg.781	Phosphoglycerate mutase (EC 5.4.2.1);Ontology_term=KEGG_ENZYME:5.4.2.1			763471	764163	693	YP_809951.1	phosphoglycerate mutase	73.42	222	59	0	25:690	1:222	3e-98	350
OKIT_0767	orf00861_AWRIB616_contig1_group1_764295_764573_len=279	fig|336988.4.peg.782	FIG00885686: hypothetical protein			764295	764573	279	YP_809952.1	hypothetical protein	85.71	84	12	0	1:252	1:84	1e-38	149
OKIT_0768	orf00862_AWRIB616_contig1_group1_764574_765185_len=612	fig|336988.4.peg.783	DNA-3-methyladenine glycosylase (EC 3.2.2.20);Ontology_term=KEGG_ENZYME:3.2.2.20			764574	765185	612	YP_809953.1	DNA-3-methyladenine glycosylase I	61.14	193	74	1	22:597	7:199	7e-70	255
OKIT_0769	orf00863_AWRIB616_contig1_group1_765324_766358_len=1035	fig|336988.4.peg.784	FIG00886178: hypothetical protein			765324	766358	1035	YP_809954.1	permease	73.87	333	87	0	19:1017	7:339	1e-143	501
OKIT_0770	orf00864_AWRIB616_contig1_group1_766654_766364_len=291	fig|336988.4.peg.785	Predicted acetyltransferase			766654	766364	291	No_hit
OKIT_0771	orf00865_AWRIB616_contig1_group1_766763_766945_len=183	fig|336988.4.peg.786	hypothetical protein			766763	766945	183	YP_809956.1	hypothetical protein	79.25	53	11	0	10:168	5:57	2e-21	92.8
OKIT_0772	orf00866_AWRIB616_contig1_group1_767010_767471_len=462	fig|336988.4.peg.787	Deoxyuridine 5-triphosphate nucleotidohydrolase (EC 3.6.1.23);Ontology_term=KEGG_ENZYME:3.6.1.23			767010	767471	462	YP_809957.1	deoxyuridine 5-triphosphate	78.67	150	32	0	10:459	1:150	4e-67	245
OKIT_0773	orf00868_AWRIB616_contig1_group1_767474_768880_len=1407	fig|336988.4.peg.788	DNA repair protein RadA			767474	768880	1407	YP_809959.1	DNA repair protein RadA	88.79	464	52	0	1:1392	1:464	0.0	818
OKIT_0774	orf00869_AWRIB616_contig1_group1_768907_769578_len=672	fig|336988.4.peg.789	Beta-phosphoglucomutase (EC 5.4.2.6);Ontology_term=KEGG_ENZYME:5.4.2.6			768907	769578	672	YP_809960.1	HAD family sugar phosphatase	67.12	222	73	0	1:666	1:222	2e-82	297
OKIT_0775	orf00871_AWRIB616_contig1_group1_769628_770209_len=582	fig|336988.4.peg.790	Nucleoside 5-triphosphatase RdgB (dHAPTP2C dITP2C XTP-specific) (EC 3.6.1.15);Ontology_term=KEGG_ENZYME:3.6.1.15			769628	770209	582	YP_809961.1	xanthosine triphosphate pyrophosphatase	66.84	193	64	0	1:579	12:204	4e-75	272
OKIT_0776	orf00872_AWRIB616_contig1_group1_770232_771725_len=1494	fig|336988.4.peg.791	Glutamyl-tRNA synthetase (EC 6.1.1.17) @ Glutamyl-tRNA(Gln) synthetase (EC 6.1.1.24);Ontology_term=KEGG_ENZYME:6.1.1.17,KEGG_ENZYME:6.1.1.24			770232	771725	1494	YP_809962.1	glutamyl-tRNA synthetase	83.67	496	81	0	1:1488	1:496	0.0	862
OKIT_0777	orf00873_AWRIB616_contig1_group1_771805_772623_len=819	fig|336988.4.peg.792	FIG00885764: hypothetical protein			771805	772623	819	YP_809963.1	phosphoribosyltransferse	88.97	272	30	0	1:816	1:272	7e-141	491
OKIT_0778	orf00874_AWRIB616_contig1_group1_772652_773212_len=561	fig|336988.4.peg.793	Predicted membrane protein			772652	773212	561	YP_809964.1	hypothetical protein	51.08	186	90	1	1:558	1:185	1e-51	194
OKIT_0779	orf00876_AWRIB616_contig1_group1_773440_773282_len=159	fig|336988.4.peg.794	hypothetical protein			773440	773282	159	No_hit
OKIT_0780	orf00875_AWRIB616_contig1_group1_773528_773713_len=186	fig|336988.4.peg.795	hypothetical protein			773528	773713	186	No_hit
OKIT_0781	orf00877_AWRIB616_contig1_group1_773781_773990_len=210	fig|336988.4.peg.796	hypothetical protein			773781	773990	210	No_hit
OKIT_0782	orf00878_AWRIB616_contig1_group1_774692_774372_len=321	fig|336988.4.peg.797	hypothetical protein			774692	774372	321	No_hit
OKIT_0783	orf00879_AWRIB616_contig1_group1_775001_774744_len=258	fig|336988.4.peg.798	hypothetical protein			775001	774744	258	No_hit
OKIT_0784	orf00880_AWRIB616_contig1_group1_775245_775042_len=204	fig|336988.4.peg.799	hypothetical protein			775245	775042	204	No_hit
OKIT_0785	orf00882_AWRIB616_contig1_group1_775770_775390_len=381	fig|336988.4.peg.800	hypothetical protein			775770	775390	381	No_hit
OKIT_0786	orf00883_AWRIB616_contig1_group1_776097_775924_len=174	fig|336988.4.peg.801	hypothetical protein			776097	775924	174	No_hit
OKIT_0787	orf00884_AWRIB616_contig1_group1_776598_776203_len=396	fig|336988.4.peg.802	hypothetical protein			776598	776203	396	No_hit
OKIT_0788	orf00885_AWRIB616_contig1_group1_777006_776602_len=405	fig|336988.4.peg.803	hypothetical protein			777006	776602	405	No_hit
OKIT_0789	orf00886_AWRIB616_contig1_group1_778010_777129_len=882	fig|336988.4.peg.804	transcriptional regulator2C MutR family			778010	777129	882	YP_809849.1	XRE family transcriptional regulator	36.59	287	173	4	10:864	5:284	3e-48	184
OKIT_0790	orf00887_AWRIB616_contig1_group1_778402_778695_len=294	fig|336988.4.peg.806	hypothetical protein	lactococcin A immunity protein	Bacteriocin	778402	778695	294	No_hit
OKIT_0791	orf00888_AWRIB616_contig1_group1_779464_778871_len=594	fig|336988.4.peg.807	FIG00885565: hypothetical protein	transcriptional regulator, TetR/AcrR family		779464	778871	594	YP_809759.1	transcriptional regulator	71.79	195	55	0	1:585	1:195	9e-78	281
OKIT_0792	orf00889_AWRIB616_contig1_group1_779573_781054_len=1482	fig|336988.4.peg.808	FIG00885717: hypothetical protein	major facilitator superfamily permease		779573	781054	1482	YP_809760.1	major facilitator superfamily permease	76.06	493	118	0	1:1479	1:493	0.0	765
OKIT_0793	orf00890_AWRIB616_contig1_group1_781254_781096_len=159	fig|336988.4.peg.809	hypothetical protein			781254	781096	159	No_hit
OKIT_0794	orf00891_AWRIB616_contig1_group1_781401_782369_len=969	fig|336988.4.peg.810	D-3-phosphoglycerate dehydrogenase (EC 1.1.1.95);Ontology_term=KEGG_ENZYME:1.1.1.95			781401	782369	969	YP_810300.1	lactate dehydrogenase or related 2-hydroxyacid	70.75	318	93	0	1:954	1:318	9e-132	461
OKIT_0795	orf00892_AWRIB616_contig1_group1_782478_784184_len=1707	fig|336988.4.peg.811	Glycerophosphoryl diester phosphodiesterase (EC 3.1.4.46);Ontology_term=KEGG_ENZYME:3.1.4.46			782478	784184	1707	No_hit
OKIT_0796	orf00893_AWRIB616_contig1_group1_784209_786002_len=1794	fig|336988.4.peg.812	ABC-type multidrug transport system2C ATPase and permease components			784209	786002	1794	YP_811152.1	tRNA-Pro	26.88	465	292	11	436:1782	148:580	4e-39	155
OKIT_0797	orf00894_AWRIB616_contig1_group1_787283_786003_len=1281	fig|336988.4.peg.813	permease2C putative			787283	786003	1281	YP_810015.1	major facilitator superfamily permease	31.95	385	258	1	70:1224	16:396	2e-60	225
OKIT_0798	orf00895_AWRIB616_contig1_group1_787809_787465_len=345	fig|336988.4.peg.814	hypothetical protein			787809	787465	345	No_hit
OKIT_0799	orf00896_AWRIB616_contig1_group1_788795_787947_len=849	fig|336988.4.peg.815	transcriptional regulator2C MutR family			788795	787947	849	YP_809849.1	XRE family transcriptional regulator	40.57	281	153	4	25:837	10:286	3e-55	207
OKIT_0800	orf00898_AWRIB616_contig1_group1_789219_790880_len=1662	fig|336988.4.peg.816	ABC-type multidrug transport system2C ATPase and permease component			789219	790880	1662	YP_810039.1	cytochrome bd biosynthesis ABC-type transporter,	25.75	536	374	11	13:1587	7:529	9e-37	147
OKIT_0801	orf00899_AWRIB616_contig1_group1_791658_790837_len=822	fig|336988.4.peg.817	Alpha/beta superfamily hydrolase			791658	790837	822	YP_809966.1	alpha/beta fold family hydrolase	62.03	266	97	2	1:789	1:265	2e-94	337
OKIT_0802	orf00900_AWRIB616_contig1_group1_791987_793006_len=1020	fig|336988.4.peg.819	Lipoate-protein ligase A			791987	793006	1020	YP_809967.1	lipoate-protein ligase	77.74	328	73	0	1:984	1:328	3e-156	543
OKIT_0803	orf00901_AWRIB616_contig1_group1_792999_794135_len=1137	fig|336988.4.peg.820	Acetoin dehydrogenase E1 component alpha-subunit (EC 1.2.4.-);Ontology_term=KEGG_ENZYME:1.2.4.-			792999	794135	1137	YP_809968.1	acetoin dehydrogenase complex, E1 component,	82.01	378	68	0	1:1134	1:378	0.0	644
OKIT_0804	orf00902_AWRIB616_contig1_group1_794137_795117_len=981	fig|336988.4.peg.821	Pyruvate dehydrogenase E1 component beta subunit (EC 1.2.4.1);Ontology_term=KEGG_ENZYME:1.2.4.1			794137	795117	981	YP_809969.1	acetoin dehydrogenase complex, E1 component,	84.66	326	50	0	1:978	1:326	1e-164	571
OKIT_0805	orf00903_AWRIB616_contig1_group1_795110_796408_len=1299	fig|336988.4.peg.822	Dihydrolipoamide acetyltransferase component (E2) of acetoin dehydrogenase complex (EC 2.3.1.-);Ontology_term=KEGG_ENZYME:2.3.1.-			795110	796408	1299	YP_809970.1	acetoin/pyruvate dehydrogenase complex, E2	71.21	448	113	2	1:1296	1:448	4e-179	619
OKIT_0806	orf00904_AWRIB616_contig1_group1_796411_797820_len=1410	fig|336988.4.peg.823	Dihydrolipoamide dehydrogenase of acetoin dehydrogenase (EC 1.8.1.4);Ontology_term=KEGG_ENZYME:1.8.1.4			796411	797820	1410	YP_809971.1	dihydrolipoamide dehydrogenase	81.62	468	86	0	4:1407	6:473	0.0	780
OKIT_0807	orf00905_AWRIB616_contig1_group1_797882_798682_len=801	fig|336988.4.peg.824	Protein tyrosine/serine phosphatase			797882	798682	801	YP_809972.1	protein tyrosine/serine phosphatase	71.65	261	74	0	1:783	1:261	2e-111	393
OKIT_0808	orf00906_AWRIB616_contig1_group1_798820_799677_len=858	fig|336988.4.peg.825	contains transcriptional regulator helix-turn-helix domain			798820	799677	858	No_hit
OKIT_0809	orf00907_AWRIB616_contig1_group1_799805_800668_len=864	fig|336988.4.peg.826	ABC transporter2C ATP-binding protein			799805	800668	864	YP_811309.1	ABC-type multidrug transport system, ATPase	30.27	294	189	6	4:846	8:298	2e-32	131
OKIT_0810	orf00908_AWRIB616_contig1_group1_800671_801612_len=942	fig|336988.4.peg.827	hypothetical protein			800671	801612	942	No_hit
OKIT_0811	orf00909_AWRIB616_contig1_group1_801609_802889_len=1281	fig|336988.4.peg.828	Putative uncharacterized protein			801609	802889	1281	No_hit
OKIT_0812	orf00911_AWRIB616_contig1_group1_803137_804345_len=1209	fig|336988.4.peg.829	N-acetyl-L2CL-diaminopimelate aminotransferase (EC 2.6.1.-);Ontology_term=KEGG_ENZYME:2.6.1.-			803137	804345	1209	YP_809973.1	aminotransferase	70.03	397	119	0	1:1191	1:397	3e-164	570
OKIT_0813	orf00912_AWRIB616_contig1_group1_804389_805423_len=1035	fig|336988.4.peg.830	Membrane protein			804389	805423	1035	YP_809996.1	membrane protein, putative toxin regulator	73.12	320	86	0	70:1029	1:320	7e-133	465
OKIT_0814	orf00913_AWRIB616_contig1_group1_805465_806559_len=1095	fig|336988.4.peg.831	Predicted multitransmembrane protein			805465	806559	1095	YP_809997.1	multitransmembrane protein	67.77	363	116	1	1:1086	1:363	1e-141	494
OKIT_0815	orf00914_AWRIB616_contig1_group1_806556_807320_len=765	fig|336988.4.peg.832	FIG00885676: hypothetical protein			806556	807320	765	YP_809998.1	multitransmembrane protein	78.57	252	54	0	1:756	1:252	2e-106	377
OKIT_0816	orf00915_AWRIB616_contig1_group1_808161_807331_len=831	fig|336988.4.peg.833	Phosphatase YidA			808161	807331	831	YP_809999.1	HAD superfamily hydrolase	79.34	271	56	0	1:813	1:271	2e-124	437
OKIT_0817	orf00916_AWRIB616_contig1_group1_808199_809896_len=1698	fig|336988.4.peg.834	Phosphoglucomutase (EC 5.4.2.2);Ontology_term=KEGG_ENZYME:5.4.2.2			808199	809896	1698	YP_810000.1	alpha-phosphoglucomutase	84.07	565	90	0	1:1695	1:565	0.0	972
OKIT_0818	orf00918_AWRIB616_contig1_group1_810031_811008_len=978	fig|336988.4.peg.836	hydrolase of the alpha/beta superfamily			810031	811008	978	YP_809862.1	alpha/beta fold family hydrolase	71.75	308	87	0	19:942	2:309	5e-139	486
OKIT_0819	orf00919_AWRIB616_contig1_group1_811052_811609_len=558	fig|336988.4.peg.837	Nicotinamidase (EC 3.5.1.19);Ontology_term=KEGG_ENZYME:3.5.1.19			811052	811609	558	YP_810001.1	amidase	76.22	185	44	0	1:555	1:185	6e-86	308
OKIT_0820	orf00920_AWRIB616_contig1_group1_813713_811644_len=2070	fig|336988.4.peg.838	hypothetical protein			813713	811644	2070	YP_809860.1	Lyzozyme M1 (1,4-beta-N-acetylmuramidase)	36.49	496	285	14	178:1629	16:493	5e-74	271
OKIT_0821	orf00922_AWRIB616_contig1_group1_813949_815130_len=1182	fig|336988.4.peg.840	NAD(P) transhydrogenase alpha subunit (EC 1.6.1.2);Ontology_term=KEGG_ENZYME:1.6.1.2			813949	815130	1182	YP_810002.1	NAD/NADP transhydrogenase alpha subunit	84.44	392	61	0	1:1176	1:392	0.0	638
OKIT_0822	orf00923_AWRIB616_contig1_group1_815127_815435_len=309	fig|336988.4.peg.841	NAD(P) transhydrogenase alpha subunit (EC 1.6.1.2);Ontology_term=KEGG_ENZYME:1.6.1.2			815127	815435	309	No_hit
OKIT_0823	orf00924_AWRIB616_contig1_group1_815432_816844_len=1413	fig|336988.4.peg.842	NAD(P) transhydrogenase subunit beta (EC 1.6.1.2);Ontology_term=KEGG_ENZYME:1.6.1.2			815432	816844	1413	YP_810003.1	NAD/NADP transhydrogenase beta subunit	85.96	470	66	0	1:1410	1:470	0.0	780
OKIT_0824	orf00925_AWRIB616_contig1_group1_816914_818959_len=2046	fig|336988.4.peg.843	membrane protein			816914	818959	2046	YP_809871.1_YP_810106.1		24.52	681	465	18	28:2028	9:654	3e-45	175
OKIT_0825	orf00926_AWRIB616_contig1_group1_819031_821052_len=2022	fig|336988.4.peg.844	Excinuclease ABC subunit B			819031	821052	2022	YP_810004.1	excinuclease ABC subunit B	89.45	673	71	0	1:2019	1:673	0.0	1209
OKIT_0826	orf00928_AWRIB616_contig1_group1_821125_821856_len=732	fig|336988.4.peg.845	3-oxoacyl-[acyl-carrier protein] reductase (EC 1.1.1.100);Ontology_term=KEGG_ENZYME:1.1.1.100			821125	821856	732	YP_810005.1	Short-chain alcohol dehydrogenase	83.54	243	40	0	1:729	1:243	3e-117	412
OKIT_0827	orf00929_AWRIB616_contig1_group1_821897_824812_len=2916	fig|336988.4.peg.846	Excinuclease ABC subunit A			821897	824812	2916	YP_810006.1	excinuclease ABC subunit A	89.15	949	103	0	43:2889	1:949	0.0	1691
OKIT_0828	orf00930_AWRIB616_contig1_group1_824947_825582_len=636	fig|336988.4.peg.847	Rrf2-linked NADH-flavin reductase			824947	825582	636	YP_810345.1	putative NADH-flavin reductase	37.04	216	129	6	1:630	1:215	1e-30	125
OKIT_0829	orf00932_AWRIB616_contig1_group1_825738_827012_len=1275	fig|336988.4.peg.848	Uracil permease			825738	827012	1275	YP_810007.1	xanthine/uracil permease	86.56	424	56	1	1:1272	1:423	0.0	724
OKIT_0830	orf00933_AWRIB616_contig1_group1_827126_827506_len=381	fig|336988.4.peg.849	hypothetical protein			827126	827506	381	YP_810124.1	hypothetical protein	57.94	126	53	0	1:378	1:126	3e-39	152
OKIT_0831	orf00934_AWRIB616_contig1_group1_828167_827523_len=645	fig|336988.4.peg.850	NADH dehydrogenase (EC 1.6.99.3);Ontology_term=KEGG_ENZYME:1.6.99.3			828167	827523	645	YP_809886.1	nucleoside-diphosphate-sugar epimerase	48.83	213	106	1	1:639	1:210	1e-58	218
OKIT_0832	orf00935_AWRIB616_contig1_group1_828805_828164_len=642	fig|336988.4.peg.851	carbonic anhydrase precursor			828805	828164	642	YP_809887.1	carbonic anhydrase	54.85	206	93	0	1:618	1:206	5e-67	246
OKIT_0833	orf00936_AWRIB616_contig1_group1_829175_829579_len=405	fig|336988.4.peg.852	hypothetical protein			829175	829579	405	No_hit
OKIT_0834	orf00937_AWRIB616_contig1_group1_829726_830175_len=450	fig|336988.4.peg.853	spermine/spermidine acetyltransferase			829726	830175	450	No_hit
OKIT_0835	tRNA	fig|336988.4.rna.43	tRNA-Arg-CCG			831058	830986
OKIT_0836	orf00939_AWRIB616_contig1_group1_831273_832298_len=1026	fig|336988.4.peg.855	NAD-dependent glyceraldehyde-3-phosphate dehydrogenase (EC 1.2.1.12);Ontology_term=KEGG_ENZYME:1.2.1.12			831273	832298	1026	YP_810029.1	glyceraldehyde-3-phosphate dehydrogenase	90.62	341	32	0	1:1023	1:341	0.0	632
OKIT_0837	orf00940_AWRIB616_contig1_group1_832428_832655_len=228	fig|336988.4.peg.856	Preprotein translocase subunit SecG (TC 3.A.5.1.1)			832428	832655	228	YP_810030.1	preprotein translocase subunit SecG	80.00	75	15	0	1:225	29:103	4e-31	124
OKIT_0838	orf00941_AWRIB616_contig1_group1_833933_832695_len=1239	fig|336988.4.peg.857	Aminopeptidase S (Leu2C Val2C Phe2C Tyr preference) (EC 3.4.11.24);Ontology_term=KEGG_ENZYME:3.4.11.24			833933	832695	1239	No_hit
OKIT_0839	orf00942_AWRIB616_contig1_group1_834068_834922_len=855	fig|336988.4.peg.858	FIG00885971: hypothetical protein			834068	834922	855	YP_810032.1	Lyzozyme M1 (1,4-beta-N-acetylmuramidase)	59.65	285	113	1	4:852	13:297	9e-96	342
OKIT_0840	orf00943_AWRIB616_contig1_group1_834919_835923_len=1005	fig|336988.4.peg.859	oxidoreductase2C Gfo/Idh/MocA family			834919	835923	1005	YP_810033.1	tRNA-Arg	63.39	336	119	3	1:1002	1:334	8e-120	422
OKIT_0841	tRNA	fig|336988.4.rna.44	tRNA-Arg-CCT			835931	836003
OKIT_0842	orf00944_AWRIB616_contig1_group1_836224_837402_len=1179	fig|336988.4.peg.860	Membrane protein			836224	837402	1179	YP_809996.1	membrane protein, putative toxin regulator	28.41	352	216	4	112:1167	1:316	3e-38	151
OKIT_0843	orf00945_AWRIB616_contig1_group1_837459_838454_len=996	fig|336988.4.peg.861	D-lactate dehydrogenase (EC 1.1.1.28);Ontology_term=KEGG_ENZYME:1.1.1.28			837459	838454	996	YP_810037.1	phosphoglycerate dehydrogenase or related	92.15	331	26	0	1:993	1:331	6e-177	612
OKIT_0844	orf00946_AWRIB616_contig1_group1_838581_839255_len=675	fig|336988.4.peg.862	N-acetylmuramidase			838581	839255	675	YP_810040.1	N-acetylmuramidase	61.29	186	72	0	115:672	33:218	9e-66	241
OKIT_0845	orf00947_AWRIB616_contig1_group1_839339_841588_len=2250	fig|336988.4.peg.863	ATP-dependent DNA helicase UvrD/PcrA			839339	841588	2250	YP_810050.1	ATP-dependent DNA helicase PcrA	85.60	750	105	2	1:2247	1:748	0.0	1271
OKIT_0846	orf00948_AWRIB616_contig1_group1_841591_843648_len=2058	fig|336988.4.peg.864	DNA ligase (EC 6.5.1.2);Ontology_term=KEGG_ENZYME:6.5.1.2			841591	843648	2058	YP_810051.1	NAD-dependent DNA ligase	83.31	683	113	1	1:2049	1:682	0.0	1138
OKIT_0847	orf00949_AWRIB616_contig1_group1_843698_844804_len=1107	fig|336988.4.peg.865	Putative pheromone cAM373 precursor lipoprotein CamS			843698	844804	1107	YP_810052.1	hypothetical protein	64.64	362	127	1	19:1104	1:361	6e-140	489
OKIT_0848	orf00950_AWRIB616_contig1_group1_844885_845376_len=492	fig|336988.4.peg.866	FIG000325: clustered with transcription termination protein NusA			844885	845376	492	YP_810053.1	hypothetical protein	61.29	155	60	0	22:486	1:155	1e-54	204
OKIT_0849	orf00951_AWRIB616_contig1_group1_845379_846800_len=1422	fig|336988.4.peg.867	Transcription termination protein NusA			845379	846800	1422	YP_810054.1	transcription elongation factor	85.50	469	66	2	1:1404	1:468	0.0	786
OKIT_0850	orf00952_AWRIB616_contig1_group1_846807_847148_len=342	fig|336988.4.peg.868	COG2740: Predicted nucleic-acid-binding protein implicated in transcription termination			846807	847148	342	YP_810055.1	nucleic-acid-binding protein implicated in	72.57	113	31	0	1:339	1:113	1e-42	163
OKIT_0851	orf00953_AWRIB616_contig1_group1_847177_847434_len=258	fig|336988.4.peg.869	ribosomal protein L7Ae family protein			847177	847434	258	YP_810056.1	50S ribosomal protein L7AE	76.19	84	20	0	4:255	8:91	8e-31	123
OKIT_0852	orf00955_AWRIB616_contig1_group1_847431_849941_len=2511	fig|336988.4.peg.870	Translation initiation factor 2			847431	849941	2511	YP_810057.1	translation initiation factor 2	84.95	837	117	4	1:2508	1:829	0.0	1396
OKIT_0853	orf00956_AWRIB616_contig1_group1_849934_850299_len=366	fig|336988.4.peg.871	Ribosome-binding factor A			849934	850299	366	YP_810058.1	ribosome-binding factor A	85.12	121	18	0	1:363	1:121	3e-55	205
OKIT_0854	orf00957_AWRIB616_contig1_group1_851691_850366_len=1326	fig|336988.4.peg.872	Cell envelope-associated transcriptional attenuator LytR-CpsA-Psr2C subfamily F2 (as in PMID19099556)			851691	850366	1326	YP_810059.1	transcriptional regulator	68.03	416	124	3	22:1257	8:418	7e-165	572
OKIT_0855	orf00958_AWRIB616_contig1_group1_851764_852432_len=669	fig|336988.4.peg.873	Membrane-associated phospholipid phosphatase			851764	852432	669	YP_810060.1	membrane-associated phospholipid phosphatase	58.56	222	92	0	1:666	1:222	2e-74	270
OKIT_0856	orf00959_AWRIB616_contig1_group1_852526_853170_len=645	fig|336988.4.peg.874	Deoxyadenosine kinase (EC 2.7.1.76) / Deoxyguanosine kinase (EC 2.7.1.113);Ontology_term=KEGG_ENZYME:2.7.1.76,KEGG_ENZYME:2.7.1.113			852526	853170	645	YP_810061.1	deoxynucleoside kinase	87.85	214	26	0	1:642	1:214	1e-106	377
OKIT_0857	orf00960_AWRIB616_contig1_group1_853257_854558_len=1302	fig|336988.4.peg.875	ABC-type antimicrobial peptide transport system2C permease component			853257	854558	1302	YP_810062.1	peptide ABC transporter permease	44.39	392	201	4	1:1158	1:381	1e-85	308
OKIT_0858	orf00961_AWRIB616_contig1_group1_854570_855241_len=672	fig|336988.4.peg.876	ABC-type antimicrobial peptide transport system2C ATPase component			854570	855241	672	YP_810063.1	peptide ABC transporter ATPase	51.82	220	101	1	1:645	1:220	1e-61	228
OKIT_0859	orf00962_AWRIB616_contig1_group1_855288_856604_len=1317	fig|336988.4.peg.877	Seryl-tRNA synthetase (EC 6.1.1.11);Ontology_term=KEGG_ENZYME:6.1.1.11			855288	856604	1317	YP_810064.1	seryl-tRNA synthetase	87.41	437	54	1	1:1308	1:437	0.0	775
OKIT_0860	orf00963_AWRIB616_contig1_group1_856738_857694_len=957	fig|336988.4.peg.878	TyrA protein			856738	857694	957	No_hit
OKIT_0861	tRNA	fig|336988.4.rna.45	tRNA-Thr-AGT			857859	857786
OKIT_0862	orf00964_AWRIB616_contig1_group1_858110_858346_len=237	fig|336988.4.peg.879	hypothetical protein			858110	858346	237	No_hit
OKIT_0863	orf00965_AWRIB616_contig1_group1_858467_859057_len=591	fig|336988.4.peg.880	ABC transporter permease protein			858467	859057	591	No_hit
OKIT_0864	orf00966_AWRIB616_contig1_group1_860511_859147_len=1365	fig|336988.4.peg.881	Branched-chain amino acid transport system carrier protein			860511	859147	1365	YP_810066.1	branched-chain amino acid permease	71.21	448	129	0	1:1344	25:472	0.0	647
OKIT_0865	tRNA	fig|336988.4.rna.46	tRNA-Leu-TAG			860948	860867
OKIT_0866	orf00969_AWRIB616_contig1_group1_861236_861436_len=201	fig|336988.4.peg.882	LSU ribosomal protein L28p			861236	861436	201	YP_810068.1	50S ribosomal protein L28P	98.48	66	1	0	1:198	1:66	5e-33	130
OKIT_0867	orf00970_AWRIB616_contig1_group1_861536_861874_len=339	fig|336988.4.peg.883	FIG001802: Putative alkaline-shock protein			861536	861874	339	YP_810069.1	hypothetical protein	93.75	112	7	0	1:336	5:116	3e-55	205
OKIT_0868	orf00972_AWRIB616_contig1_group1_861884_863548_len=1665	fig|336988.4.peg.884	Dihydroxyacetone kinase family protein			861884	863548	1665	YP_810070.1	dihydroxyacetone kinase-like protein	85.74	554	79	0	1:1662	1:554	0.0	952
OKIT_0869	orf00974_AWRIB616_contig1_group1_863658_865688_len=2031	fig|336988.4.peg.885	ATP-dependent DNA helicase RecG (EC 3.6.1.-);Ontology_term=KEGG_ENZYME:3.6.1.-			863658	865688	2031	YP_810071.1	ATP-dependent DNA helicase RecG	77.66	676	151	0	1:2028	1:676	0.0	1072
OKIT_0870	orf00975_AWRIB616_contig1_group1_865690_866736_len=1047	fig|336988.4.peg.886	Phosphate:acyl-ACP acyltransferase PlsX			865690	866736	1047	YP_810072.1	phosphate:acyl-[acyl carrier protein]	83.62	348	57	0	1:1044	1:348	1e-166	578
OKIT_0871	orf00976_AWRIB616_contig1_group1_866733_866984_len=252	fig|336988.4.peg.887	Acyl carrier protein			866733	866984	252	YP_810073.1	Acyl carrier protein	85.54	83	12	0	1:249	1:83	2e-36	142
OKIT_0872	orf00977_AWRIB616_contig1_group1_867071_867766_len=696	fig|336988.4.peg.888	Ribonuclease III (EC 3.1.26.3);Ontology_term=KEGG_ENZYME:3.1.26.3			867071	867766	696	YP_810075.1	dsRNA-specific ribonuclease	84.85	231	35	0	1:693	1:231	2e-111	394
OKIT_0873	orf00978_AWRIB616_contig1_group1_867763_871305_len=3543	fig|336988.4.peg.889	Chromosome partition protein smc			867763	871305	3543	YP_810076.1	condensin subunit Smc	62.83	1181	437	1	1:3537	1:1181	0.0	1393
OKIT_0874	orf00979_AWRIB616_contig1_group1_871307_872413_len=1107	fig|336988.4.peg.890	Signal recognition particle receptor protein FtsY (alpha subunit) (TC 3.A.5.1.1)			871307	872413	1107	YP_810077.1	signal recognition particle-docking protein	78.01	382	70	2	1:1104	1:382	3e-165	573
OKIT_0875	orf00980_AWRIB616_contig1_group1_872415_872729_len=315	fig|336988.4.peg.891	Signal recognition particle associated protein			872415	872729	315	YP_810078.1	hypothetical protein	75.00	104	26	0	1:312	1:104	6e-39	150
OKIT_0876	orf00981_AWRIB616_contig1_group1_872729_874234_len=1506	fig|336988.4.peg.892	Signal recognition particle2C subunit Ffh SRP54 (TC 3.A.5.1.1)			872729	874234	1506	YP_810079.1	signal recognition particle subunit FFH/SRP54	85.40	507	68	2	1:1503	1:507	0.0	851
OKIT_0877	orf00982_AWRIB616_contig1_group1_874231_876618_len=2388	fig|336988.4.peg.893	Recombination inhibitory protein MutS2			874231	876618	2388	YP_810080.1	MutS family ATPase	73.71	795	209	0	1:2385	1:795	0.0	1159
OKIT_0878	orf00983_AWRIB616_contig1_group1_877058_876615_len=444	fig|336988.4.peg.894	Flavodoxin			877058	876615	444	YP_810081.1	flavodoxin	60.54	147	58	0	1:441	15:161	1e-52	197
OKIT_0879	orf00984_AWRIB616_contig1_group1_877580_879568_len=1989	fig|336988.4.peg.895	Threonyl-tRNA synthetase (EC 6.1.1.3);Ontology_term=KEGG_ENZYME:6.1.1.3			877580	879568	1989	YP_810082.1	threonyl-tRNA synthetase / Ser-tRNA(Thr)	83.86	663	106	1	1:1986	1:663	0.0	1156
OKIT_0880	orf00985_AWRIB616_contig1_group1_879565_880905_len=1341	fig|336988.4.peg.896	Aminopeptidase C (EC 3.4.22.40);Ontology_term=KEGG_ENZYME:3.4.22.40			879565	880905	1341	YP_810083.1	aminopeptidase C	87.44	446	56	0	1:1338	1:446	0.0	804
OKIT_0881	orf00986_AWRIB616_contig1_group1_881155_882342_len=1188	fig|336988.4.peg.897	Cyclopropane-fatty-acyl-phospholipid synthase (EC 2.1.1.79);Ontology_term=KEGG_ENZYME:2.1.1.79			881155	882342	1188	YP_810736.1	cyclopropane-fatty-acyl-phospholipid synthase	67.68	393	127	0	4:1182	1:393	3e-159	553
OKIT_0882	orf00987_AWRIB616_contig1_group1_882503_883036_len=534	fig|336988.4.peg.898	hypothetical protein			882503	883036	534	YP_809825.1	hypothetical protein	49.14	175	89	0	1:525	1:175	1e-49	187
OKIT_0883	orf00989_AWRIB616_contig1_group1_883527_884468_len=942	fig|336988.4.peg.900	ABC transporter2C ATP-binding protein			883527	884468	942	YP_810321.1_YP_811056.1		32.01	278	167	7	49:834	3:274	3e-27	114
OKIT_0884	orf00990_AWRIB616_contig1_group1_884487_885257_len=771	fig|336988.4.peg.901	ABC-type polysaccharide/polyol phosphate export system2C permease component			884487	885257	771	No_hit
OKIT_0885	orf00991_AWRIB616_contig1_group1_885546_886448_len=903	fig|336988.4.peg.902	Amino acid adenylation		Bacteriocin	885546	886448	903	No_hit
OKIT_0886	orf00992_AWRIB616_contig1_group1_886468_887466_len=999	fig|336988.4.peg.903	Streptolysin S biosynthesis protein C (SagC)		Bacteriocin	886468	887466	999	No_hit
OKIT_0887	orf00993_AWRIB616_contig1_group1_887463_888842_len=1380	fig|336988.4.peg.904	Streptolysin S biosynthesis protein D (SagD)		Bacteriocin	887463	888842	1380	No_hit
OKIT_0888	orf00995_AWRIB616_contig1_group1_888808_889470_len=663	fig|336988.4.peg.905	hypothetical protein			888808	889470	663	No_hit
OKIT_0889	orf00996_AWRIB616_contig1_group1_890216_889707_len=510	fig|336988.4.peg.906	hypothetical protein	site-specific recombinase, DNA invertase Pin related protein		890216	889707	510	No_hit
OKIT_0890	orf00997_AWRIB616_contig1_group1_890639_891400_len=762	fig|336988.4.peg.907	SAM-dependent methyltransferase			890639	891400	762	No_hit
OKIT_0891	orf00998_AWRIB616_contig1_group1_891589_891864_len=276	fig|336988.4.peg.908	hypothetical protein			891589	891864	276	No_hit
OKIT_0892	orf00999_AWRIB616_contig1_group1_891989_894055_len=2067	fig|336988.4.peg.909	FIG00749639: hypothetical protein	Conjugation nicking enzyme (TraA)-like	Conjugation	891989	894055	2067	YP_809730.1	hypothetical protein	51.26	119	58	0	1693:2049	1:119	9e-32	130
OKIT_0893	orf01000_AWRIB616_contig1_group1_894128_894415_len=288	fig|336988.4.peg.910	hypothetical protein	putative toxin-antitoxin system, antitoxin component		894128	894415	288	No_hit
OKIT_0894	orf01001_AWRIB616_contig1_group1_894419_894733_len=315	fig|336988.4.peg.911	hypothetical protein	RelE family toxin-antitoxin system		894419	894733	315	No_hit
OKIT_0895	orf01003_AWRIB616_contig1_group1_894876_895493_len=618	fig|336988.4.peg.912	FIG00745127: hypothetical protein	hypothetical protein pWCFS103_36	Conjugation	894876	895493	618	No_hit
OKIT_0896	orf01004_AWRIB616_contig1_group1_895495_895830_len=336	fig|336988.4.peg.913	protein TrsB	TrsB (TraB) family protein	Conjugation	895495	895830	336	No_hit
OKIT_0897	orf01005_AWRIB616_contig1_group1_895851_896213_len=363	fig|336988.4.peg.914	protein TrsC	TrsC (TraC) family protein	Conjugation	895851	896213	363	No_hit
OKIT_0898	orf01006_AWRIB616_contig1_group1_896182_896841_len=660	fig|336988.4.peg.915	conjugation protein	TrsD (TraD) family protein	Conjugation	896182	896841	660	No_hit
OKIT_0899	orf01007_AWRIB616_contig1_group1_896853_898871_len=2019	fig|336988.4.peg.916	protein TrsE	TrsE (TraE) family protein	Conjugation	896853	898871	2019	No_hit
OKIT_0900	orf01008_AWRIB616_contig1_group1_898864_900285_len=1422	fig|336988.4.peg.917	protein TrsF	TrsF (TraF) family protein	Conjugation	898864	900285	1422	No_hit
OKIT_0901	orf01009_AWRIB616_contig1_group1_900286_901440_len=1155	fig|336988.4.peg.918	FIG00749129: hypothetical protein	bacteriophage peptidoglycan hydrolase		900286	901440	1155	No_hit
OKIT_0902	orf01010_AWRIB616_contig1_group1_901455_902072_len=618	fig|336988.4.peg.919	FIG00748167: hypothetical protein	hypothetical protein pWCFS103_29	Conjugation	901455	902072	618	No_hit
OKIT_0903	orf01011_AWRIB616_contig1_group1_902104_902427_len=324	fig|336988.4.peg.920	FIG00752991: hypothetical protein	hypothetical protein pWCFS103_28	Conjugation	902104	902427	324	No_hit
OKIT_0904	orf01012_AWRIB616_contig1_group1_902428_902898_len=471	fig|336988.4.peg.921	protein TrsJ	TrsJ (TraJ) family protein	Conjugation	902428	902898	471	No_hit
OKIT_0905	orf01013_AWRIB616_contig1_group1_902900_904411_len=1512	fig|336988.4.peg.922	conjugation protein	TraG/TraD/TrsK family protein	Conjugation	902900	904411	1512	No_hit
OKIT_0906	orf01014_AWRIB616_contig1_group1_904435_905307_len=873	fig|336988.4.peg.923	conjugation protein	TrsL family protein	Conjugation	904435	905307	873	No_hit
OKIT_0907	orf01015_AWRIB616_contig1_group1_905400_905573_len=174	fig|336988.4.peg.924	hypothetical protein			905400	905573	174	No_hit
OKIT_0908	orf01016_AWRIB616_contig1_group1_905570_905785_len=216	fig|336988.4.peg.925	FIG00743136: hypothetical protein			905570	905785	216	No_hit
OKIT_0909	orf01017_AWRIB616_contig1_group1_905789_906913_len=1125	fig|336988.4.peg.926	LtrC-like protein		Conjugation	905789	906913	1125	No_hit
OKIT_0910	orf01018_AWRIB616_contig1_group1_907826_906957_len=870	fig|336988.4.peg.927	LysR family transcriptional regulator STM2281			907826	906957	870	YP_810036.1	transcriptional regulator	34.50	258	169	0	28:801	12:269	8e-39	152
OKIT_0911	orf01019_AWRIB616_contig1_group1_907927_908406_len=480	fig|336988.4.peg.928	YbaK family protein	Prolyl-tRNA editing protein		907927	908406	480	No_hit
OKIT_0912	orf01020_AWRIB616_contig1_group1_908424_909206_len=783	fig|336988.4.peg.929	Phenazine biosynthesis protein PhzF		Bacteriocin	908424	909206	783	No_hit
OKIT_0913	orf01021_AWRIB616_contig1_group1_909263_909958_len=696	fig|336988.4.peg.930	Aspartate racemase (EC 5.1.1.13);Ontology_term=KEGG_ENZYME:5.1.1.13			909263	909958	696	No_hit
OKIT_0914	orf01022_AWRIB616_contig1_group1_910138_910350_len=213	fig|336988.4.peg.931	hypothetical protein			910138	910350	213	No_hit
OKIT_0915	orf01023_AWRIB616_contig1_group1_910693_911031_len=339	fig|336988.4.peg.932	hypothetical protein			910693	911031	339	No_hit
OKIT_0916	orf01024_AWRIB616_contig1_group1_911671_911093_len=579	fig|336988.4.peg.933	hypothetical protein	hypothetical protein		911671	911093	579	No_hit
OKIT_0917	orf01025_AWRIB616_contig1_group1_911990_913030_len=1041	fig|336988.4.peg.934	Integrase	bacteriophage integrase		911990	913030	1041	No_hit
OKIT_0918	tRNA	fig|336988.4.rna.47	tRNA-Glu-CTC			913247	913173
OKIT_0919	orf01026_AWRIB616_contig1_group1_913951_914160_len=210	fig|336988.4.peg.935	hypothetical protein			913951	914160	210	No_hit
OKIT_0920	orf01027_AWRIB616_contig1_group1_915939_916379_len=441	fig|336988.4.peg.936	hypothetical protein			915939	916379	441	No_hit
OKIT_0921	orf01028_AWRIB616_contig1_group1_916579_916779_len=201	fig|336988.4.peg.937	hypothetical protein			916579	916779	201	No_hit
OKIT_0922	orf01029_AWRIB616_contig1_group1_918474_917155_len=1320	fig|336988.4.peg.938	Virulence-associated E	bacteriophage helicase		918474	917155	1320	No_hit
OKIT_0923	orf01030_AWRIB616_contig1_group1_918692_918477_len=216	fig|336988.4.peg.939	hypothetical protein			918692	918477	216	No_hit
OKIT_0924	orf01031_AWRIB616_contig1_group1_918912_918694_len=219	fig|336988.4.peg.940	hypothetical protein			918912	918694	219	No_hit
OKIT_0925	orf01032_AWRIB616_contig1_group1_919522_918959_len=564	fig|336988.4.peg.941	hypothetical protein			919522	918959	564	No_hit
OKIT_0926	orf01033_AWRIB616_contig1_group1_919713_919522_len=192	fig|336988.4.peg.942	hypothetical protein			919713	919522	192	No_hit
OKIT_0927	orf01034_AWRIB616_contig1_group1_919891_919703_len=189	fig|336988.4.peg.943	hypothetical protein			919891	919703	189	No_hit
OKIT_0928	orf01035_AWRIB616_contig1_group1_920068_921153_len=1086	fig|336988.4.peg.944	hypothetical protein			920068	921153	1086	No_hit
OKIT_0929	orf01036_AWRIB616_contig1_group1_921195_922364_len=1170	fig|336988.4.peg.945	Phage integrase	bacteriophage integrase		921195	922364	1170	No_hit
OKIT_0930	orf01037_AWRIB616_contig1_group1_922787_923365_len=579	fig|336988.4.peg.947	transcriptional regulator2C helix-turn-helix XRE-family			922787	923365	579	YP_809716.1	XRE family transcriptional regulator	60.42	192	76	0	1:576	1:192	3e-69	253
OKIT_0931	orf01038_AWRIB616_contig1_group1_923466_924320_len=855	fig|336988.4.peg.948	oxidoreductase2C aldo/keto reductase family			923466	924320	855	YP_811355.1	aldo/keto reductase	42.75	276	143	5	13:810	13:283	4e-58	216
OKIT_0932	orf01039_AWRIB616_contig1_group1_924361_924777_len=417	fig|336988.4.peg.949	Transcriptional regulator			924361	924777	417	No_hit
OKIT_0933	orf01040_AWRIB616_contig1_group1_924777_925094_len=318	fig|336988.4.peg.950	4-carboxymuconolactone decarboxylase (EC 4.1.1.44);Ontology_term=KEGG_ENZYME:4.1.1.44			924777	925094	318	No_hit
OKIT_0934	orf01041_AWRIB616_contig1_group1_925137_925745_len=609	fig|336988.4.peg.951	short-chain dehydrogenase/reductase SDR			925137	925745	609	YP_809713.1	D-alanine transfer protein, short-chain	34.65	202	124	5	4:597	5:202	3e-26	110
OKIT_0935	orf01042_AWRIB616_contig1_group1_926641_926000_len=642	fig|336988.4.peg.952	Saccharopine dehydrogenase related protein			926641	926000	642	YP_811164.1	saccharopine dehydrogenase or related protein	37.84	185	109	4	67:615	22:202	4e-29	120
OKIT_0936	orf01043_AWRIB616_contig1_group1_928056_926719_len=1338	fig|336988.4.peg.953	permease of the major facilitator superfamily			928056	926719	1338	YP_810120.1	major facilitator superfamily permease	26.23	408	287	5	13:1206	3:406	7e-40	157
OKIT_0937	orf01044_AWRIB616_contig1_group1_929584_928172_len=1413	fig|336988.4.peg.954	Succinate-semialdehyde dehydrogenase [NAD] (EC 1.2.1.24)%3B Succinate-semialdehyde dehydrogenase [NADP+] (EC 1.2.1.16);Ontology_term=KEGG_ENZYME:1.2.1.24,KEGG_ENZYME:1.2.1.16			929584	928172	1413	YP_810836.1	NAD-dependent aldehyde dehydrogenase	72.59	467	128	0	1:1401	1:467	0.0	705
OKIT_0938	orf01045_AWRIB616_contig1_group1_929785_930048_len=264	fig|336988.4.peg.955	hypothetical protein			929785	930048	264	No_hit
OKIT_0939	orf01046_AWRIB616_contig1_group1_930045_931031_len=987	fig|336988.4.peg.956	Aldo-keto reductase			930045	931031	987	YP_809705.1	aldo/keto reductase	33.65	312	203	3	4:930	3:313	6e-44	170
OKIT_0940	orf01047_AWRIB616_contig1_group1_931043_931912_len=870	fig|336988.4.peg.957	cell surface hydrolase (putative)			931043	931912	870	No_hit
OKIT_0941	orf01049_AWRIB616_contig1_group1_931942_934473_len=2532	fig|336988.4.peg.958	Excinuclease ABC subunit A paralog of unknown function			931942	934473	2532	YP_810006.1	excinuclease ABC subunit A	36.83	676	408	10	496:2490	268:935	4e-124	437
OKIT_0942	orf01050_AWRIB616_contig1_group1_934498_934953_len=456	fig|336988.4.peg.959	Flavodoxin			934498	934953	456	No_hit
OKIT_0943	orf01051_AWRIB616_contig1_group1_936321_935017_len=1305	fig|336988.4.peg.960	Predicted ferric reductase			936321	935017	1305	YP_810111.1	ferric reductase	33.79	438	281	6	1:1299	1:434	9e-72	263
OKIT_0944	orf01052_AWRIB616_contig1_group1_937024_936338_len=687	fig|336988.4.peg.961	Flavodoxin			937024	936338	687	No_hit
OKIT_0945	orf01053_AWRIB616_contig1_group1_937716_937078_len=639	fig|336988.4.peg.962	Saccharopine dehydrogenase related protein			937716	937078	639	YP_811164.1	saccharopine dehydrogenase or related protein	50.00	212	104	2	1:636	1:210	3e-55	206
OKIT_0946	orf01054_AWRIB616_contig1_group1_938251_938664_len=414	fig|336988.4.peg.963	transcriptional regulator2C MerR family			938251	938664	414	No_hit
OKIT_0947	orf01055_AWRIB616_contig1_group1_939303_938725_len=579	fig|336988.4.peg.964	Pyridoxine biosynthesis glutamine amidotransferase2C glutaminase subunit (EC 2.4.2.-);Ontology_term=KEGG_ENZYME:2.4.2.-			939303	938725	579	YP_810610.1	glutamine amidotransferase	75.39	191	47	0	1:573	1:191	5e-83	298
OKIT_0948	orf01056_AWRIB616_contig1_group1_940198_939314_len=885	fig|336988.4.peg.965	Pyridoxine biosynthesis glutamine amidotransferase2C synthase subunit (EC 2.4.2.-);Ontology_term=KEGG_ENZYME:2.4.2.-			940198	939314	885	YP_810609.1	pyridoxine biosynthesis protein	91.16	294	26	0	1:882	1:294	4e-154	535
OKIT_0949	orf01057_AWRIB616_contig1_group1_941095_940298_len=798	fig|336988.4.peg.966	ABC-type antimicrobial peptide transport system2C ATPase component			941095	940298	798	No_hit
OKIT_0950	orf01058_AWRIB616_contig1_group1_941327_942184_len=858	fig|336988.4.peg.967	hypothetical protein			941327	942184	858	No_hit
OKIT_0951	orf01059_AWRIB616_contig1_group1_942199_943572_len=1374	fig|336988.4.peg.968	Na+-driven multidrug efflux pump			942199	943572	1374	YP_810127.1	Na+-driven multidrug efflux pump	83.08	455	77	0	1:1365	1:455	0.0	743
OKIT_0952	orf01060_AWRIB616_contig1_group1_943646_944128_len=483	fig|336988.4.peg.969	Transcriptional regulator CtsR			943646	944128	483	YP_810128.1	transcriptional repressor of class III stress	93.75	160	10	0	1:480	1:160	5e-81	291
OKIT_0953	orf01061_AWRIB616_contig1_group1_944121_946586_len=2466	fig|336988.4.peg.970	ATP-dependent Clp protease2C ATP-binding subunit ClpC / Negative regulator of genetic competence clcC/mecB			944121	946586	2466	YP_810129.1	ATP-binding subunit of Clp protease and	88.92	821	90	1	1:2460	1:821	0.0	1429
OKIT_0954	orf01062_AWRIB616_contig1_group1_946638_947084_len=447	fig|336988.4.peg.971	ADP-ribose pyrophosphatase			946638	947084	447	YP_810130.1	ADP-ribose pyrophosphatase	77.03	148	34	0	1:444	21:168	6e-67	244
OKIT_0955	orf01063_AWRIB616_contig1_group1_947199_948545_len=1347	fig|336988.4.peg.972	FIG00885402: hypothetical protein			947199	948545	1347	YP_810132.1	ATPase component of ABC transporter	57.10	352	151	0	289:1344	1:352	7e-118	416
OKIT_0956	orf01064_AWRIB616_contig1_group1_948542_949393_len=852	fig|336988.4.peg.973	oxidoreductase of aldo/keto reductase family2C subgroup 1			948542	949393	852	YP_810133.1	aldo/keto reductase	85.16	283	42	0	1:849	1:283	7e-147	511
OKIT_0957	orf01065_AWRIB616_contig1_group1_949661_950050_len=390	fig|336988.4.peg.974	FIG00885584: hypothetical protein			949661	950050	390	YP_810139.1	hypothetical protein	77.59	116	26	0	1:348	4:119	2e-51	193
OKIT_0958	orf01066_AWRIB616_contig1_group1_950031_950564_len=534	fig|336988.4.peg.975	G:T/U mismatch-specific uracil/thymine DNA-glycosylase			950031	950564	534	YP_810140.1	G:T/U mismatch-specific DNA glycosylase	71.71	152	43	0	4:459	12:163	2e-63	232
OKIT_0959	orf01067_AWRIB616_contig1_group1_950698_951750_len=1053	fig|336988.4.peg.976	Alcohol dehydrogenase (EC 1.1.1.1);Ontology_term=KEGG_ENZYME:1.1.1.1			950698	951750	1053	YP_810141.1	alcohol dehydrogenase	89.77	352	34	1	1:1050	29:380	0.0	644
OKIT_0960	orf01068_AWRIB616_contig1_group1_952976_951801_len=1176	fig|336988.4.peg.977	FIG00885423: hypothetical protein			952976	951801	1176	YP_810142.1	hypothetical protein	74.17	391	99	1	7:1173	3:393	2e-168	583
OKIT_0961	tRNA	fig|336988.4.rna.48	tRNA-Ser-AGA			953112	953199
OKIT_0962	orf01069_AWRIB616_contig1_group1_953828_953469_len=360	fig|336988.4.peg.978	hypothetical protein			953828	953469	360	No_hit
OKIT_0963	orf01070_AWRIB616_contig1_group1_953975_954154_len=180	fig|336988.4.peg.979	hypothetical protein			953975	954154	180	No_hit
OKIT_0964	orf01071_AWRIB616_contig1_group1_954211_955203_len=993	fig|336988.4.peg.980	hypothetical protein	tcdA-E operon negative regulator		954211	955203	993	YP_810287.1	hypothetical protein	44.82	328	162	5	1:966	1:315	2e-71	261
OKIT_0965	orf01072_AWRIB616_contig1_group1_955952_956473_len=522	fig|336988.4.peg.982	COG1670: Acetyltransferases2C including N-acetylases of ribosomal proteins			955952	956473	522	No_hit
OKIT_0966	orf01073_AWRIB616_contig1_group1_957017_957253_len=237	fig|336988.4.peg.983	hypothetical protein			957017	957253	237	No_hit
OKIT_0967	orf01074_AWRIB616_contig1_group1_957907_957485_len=423	fig|336988.4.peg.984	FIG01116061: hypothetical protein	conjugative transposon regulatory protein	Conjugation	957907	957485	423	No_hit
OKIT_0968	orf01075_AWRIB616_contig1_group1_959097_958447_len=651	fig|336988.4.peg.985	conserved hypothetical protein%3B possible inner membrane protein			959097	958447	651	No_hit
OKIT_0969	orf01076_AWRIB616_contig1_group1_959840_959097_len=744	fig|336988.4.peg.986	ABC transporter2C ATP-binding protein			959840	959097	744	YP_810812.1	ABC-type multidrug transport system, ATPase	28.98	245	164	4	22:738	3:243	3e-27	114
OKIT_0970	orf01077_AWRIB616_contig1_group1_960048_959833_len=216	fig|336988.4.peg.987	transcriptional regulator2C AbrB family			960048	959833	216	No_hit
OKIT_0971	orf01078_AWRIB616_contig1_group1_960695_960516_len=180	fig|336988.4.peg.988	Type I restriction-modification system2C restriction subunit R (EC 3.1.21.3);Ontology_term=KEGG_ENZYME:3.1.21.3	type I restriction-modification system, restriction subunit	RM	960695	960516	180	No_hit
OKIT_0972	orf01079_AWRIB616_contig1_group1_961246_960728_len=519	fig|336988.4.peg.989	Pli0022 protein	plasmid replication initiation protein repB		961246	960728	519	No_hit
OKIT_0973	orf01080_AWRIB616_contig1_group1_961526_961239_len=288	fig|336988.4.peg.990	replication protein A	plasmid replication initiation protein repA		961526	961239	288	No_hit
OKIT_0974	orf01081_AWRIB616_contig1_group1_962071_962403_len=333	fig|336988.4.peg.991	COG0732: Restriction endonuclease S subunits	Type II restriction modification enzyme methyltransferase	RM	962071	962403	333	No_hit
OKIT_0975	orf01082_AWRIB616_contig1_group1_963771_962950_len=822	fig|336988.4.peg.992	Virulence-associated E	phage protein		963771	962950	822	No_hit
OKIT_0976	orf01083_AWRIB616_contig1_group1_963965_964198_len=234	fig|336988.4.peg.993	hypothetical protein			963965	964198	234	No_hit
OKIT_0977	orf01084_AWRIB616_contig1_group1_964972_965547_len=576	fig|336988.4.peg.994	hypothetical protein			964972	965547	576	No_hit
OKIT_0978	orf01085_AWRIB616_contig1_group1_965790_970541_len=4752	fig|336988.4.peg.995	putative helicase	type III restriction enzyme, res subunit	RM	965790	970541	4752	No_hit
OKIT_0979	orf01086_AWRIB616_contig1_group1_970605_972368_len=1764	fig|336988.4.peg.996	hypothetical protein			970605	972368	1764	No_hit
OKIT_0980	orf01088_AWRIB616_contig1_group1_972429_973046_len=618	fig|336988.4.peg.997	hypothetical protein			972429	973046	618	No_hit
OKIT_0981	orf01089_AWRIB616_contig1_group1_973854_973297_len=558	fig|336988.4.peg.998	hypothetical protein			973854	973297	558	No_hit
OKIT_0982	orf01090_AWRIB616_contig1_group1_974743_973844_len=900	fig|336988.4.peg.999	hypothetical protein			974743	973844	900	No_hit
OKIT_0983	orf01091_AWRIB616_contig1_group1_975297_974743_len=555	fig|336988.4.peg.1000	hypothetical protein			975297	974743	555	No_hit
OKIT_0984	orf01093_AWRIB616_contig1_group1_975508_975317_len=192	fig|336988.4.peg.1001	hypothetical protein			975508	975317	192	No_hit
OKIT_0985	orf01094_AWRIB616_contig1_group1_975686_975498_len=189	fig|336988.4.peg.1002	hypothetical protein			975686	975498	189	No_hit
OKIT_0986	orf01095_AWRIB616_contig1_group1_976443_977393_len=951	fig|336988.4.peg.1003	hypothetical protein			976443	977393	951	No_hit
OKIT_0987	orf01097_AWRIB616_contig1_group1_977487_978650_len=1164	fig|336988.4.peg.1004	Phage integrase			977487	978650	1164	No_hit
OKIT_0988	orf01099_AWRIB616_contig1_group1_979688_979068_len=621	fig|336988.4.peg.1005	Rrf2-linked NADH-flavin reductase			979688	979068	621	No_hit
OKIT_0989	orf01100_AWRIB616_contig1_group1_980154_979834_len=321	fig|336988.4.peg.1006	hypothetical protein			980154	979834	321	No_hit
OKIT_0990	orf01101_AWRIB616_contig1_group1_980264_980647_len=384	fig|336988.4.peg.1007	transcriptional regulator2C MerR family			980264	980647	384	No_hit
OKIT_0991	orf01102_AWRIB616_contig1_group1_980807_981028_len=222	fig|336988.4.peg.1008	hypothetical protein			980807	981028	222	No_hit
OKIT_0992	orf01103_AWRIB616_contig1_group1_981202_982272_len=1071	fig|336988.4.peg.1009	Peptide chain release factor 2			981202	982272	1071	YP_810164.1	peptide chain release factor 2	88.22	348	41	0	25:1068	25:372	0.0	634
OKIT_0993	orf01104_AWRIB616_contig1_group1_982386_983276_len=891	fig|336988.4.peg.1010	Phosphate ABC transporter2C periplasmic phosphate-binding protein PstS (TC 3.A.1.7.1)			982386	983276	891	YP_810165.1	ABC-type phosphate transport system, periplasmic	78.05	287	63	0	1:861	1:287	1e-129	454
OKIT_0994	orf01105_AWRIB616_contig1_group1_983312_984214_len=903	fig|336988.4.peg.1011	Phosphate ABC transporter2C periplasmic phosphate-binding protein PstS (TC 3.A.1.7.1)			983312	984214	903	YP_810166.1	ABC-type phosphate transport system, periplasmic	69.36	297	91	0	10:900	2:298	3e-120	423
OKIT_0995	orf01106_AWRIB616_contig1_group1_984218_985177_len=960	fig|336988.4.peg.1012	Phosphate transport system permease protein PstC (TC 3.A.1.7.1)			984218	985177	960	YP_810167.1	ABC-type phosphate transport system, permease	85.80	317	45	0	1:951	1:317	2e-152	530
OKIT_0996	orf01107_AWRIB616_contig1_group1_985177_986073_len=897	fig|336988.4.peg.1013	Phosphate transport system permease protein PstA (TC 3.A.1.7.1)			985177	986073	897	YP_810168.1	ABC-type phosphate transport system, permease	85.23	298	44	0	1:894	1:298	1e-143	501
OKIT_0997	orf01108_AWRIB616_contig1_group1_986076_986930_len=855	fig|336988.4.peg.1014	Phosphate transport ATP-binding protein PstB (TC 3.A.1.7.1)			986076	986930	855	YP_810169.1	ABC-type phosphate transport system, ATPase	88.03	284	34	0	1:852	1:284	9e-144	501
OKIT_0998	orf01109_AWRIB616_contig1_group1_986930_987694_len=765	fig|336988.4.peg.1015	Phosphate transport ATP-binding protein PstB (TC 3.A.1.7.1)			986930	987694	765	YP_810170.1	ABC-type phosphate transport system, ATPase	85.26	251	37	0	10:762	5:255	8e-125	438
OKIT_0999	orf01110_AWRIB616_contig1_group1_987722_988408_len=687	fig|336988.4.peg.1016	Phosphate transport system regulatory protein PhoU			987722	988408	687	YP_810171.1	phosphate uptake regulator, PhoU	91.23	228	20	0	1:684	1:228	8e-116	408
OKIT_1000	orf01111_AWRIB616_contig1_group1_988423_988767_len=345	fig|336988.4.peg.1017	FIG00885592: hypothetical protein			988423	988767	345	YP_810172.1	hypothetical protein	80.70	114	22	0	1:342	1:114	3e-52	195
OKIT_1001	orf01112_AWRIB616_contig1_group1_988771_989730_len=960	fig|336988.4.peg.1018	HPr kinase/phosphorylase (EC 2.7.1.-) (EC 2.7.4.-);Ontology_term=KEGG_ENZYME:2.7.1.-,KEGG_ENZYME:2.7.4.-			988771	989730	960	YP_810173.1	Serine kinase of the HPr protein, regulates	88.99	318	35	0	1:954	1:318	5e-160	555
OKIT_1002	orf01113_AWRIB616_contig1_group1_989711_990733_len=1023	fig|336988.4.peg.1019	Glycerol-3-phosphate dehydrogenase [NAD(P)+] (EC 1.1.1.94);Ontology_term=KEGG_ENZYME:1.1.1.94			989711	990733	1023	YP_810174.1	glycerol-3-phosphate dehydrogenase	72.94	340	92	0	1:1020	1:340	7e-140	488
OKIT_1003	orf01115_AWRIB616_contig1_group1_990739_991614_len=876	fig|336988.4.peg.1020	UTP--glucose-1-phosphate uridylyltransferase (EC 2.7.7.9);Ontology_term=KEGG_ENZYME:2.7.7.9			990739	991614	876	YP_810175.1	UDP-glucose pyrophosphorylase	94.50	291	16	0	1:873	1:291	3e-158	549
OKIT_1004	orf01116_AWRIB616_contig1_group1_991718_992659_len=942	fig|336988.4.peg.1021	Thioredoxin reductase (EC 1.8.1.9);Ontology_term=KEGG_ENZYME:1.8.1.9			991718	992659	942	YP_810176.1	thioredoxin reductase	80.19	313	62	0	1:939	1:313	3e-150	523
OKIT_1005	orf01117_AWRIB616_contig1_group1_992685_993116_len=432	fig|336988.4.peg.1022	Hypothetical ATP-binding protein UPF00422C contains P-loop			992685	993116	432	No_hit
OKIT_1006	orf01118_AWRIB616_contig1_group1_993113_994093_len=981	fig|336988.4.peg.1023	Hypothetical protein UPF0052			993113	994093	981	YP_810177.1	hypothetical protein	87.73	326	40	0	1:978	1:326	8e-166	575
OKIT_1007	orf01119_AWRIB616_contig1_group1_994093_995040_len=948	fig|336988.4.peg.1024	Cytoplasmic hypothetical protein DUF1992C a subgroup			994093	995040	948	YP_810178.1	hypothetical protein	76.19	315	75	0	1:945	1:315	4e-132	462
OKIT_1008	orf01120_AWRIB616_contig1_group1_995094_995696_len=603	fig|336988.4.peg.1025	ATP-dependent Clp protease proteolytic subunit (EC 3.4.21.92);Ontology_term=KEGG_ENZYME:3.4.21.92			995094	995696	603	YP_810179.1	ATP-dependent Clp protease proteolytic subunit	94.36	195	11	0	1:585	1:195	4e-102	362
OKIT_1009	orf01121_AWRIB616_contig1_group1_996062_998197_len=2136	fig|336988.4.peg.1026	ATP-binding subunit of Clp protease and DnaK/DnaJ chaperones			996062	998197	2136	YP_810181.1	ATP-binding subunit of Clp protease and	84.03	720	106	3	1:2133	1:720	0.0	1178
OKIT_1010	orf01122_AWRIB616_contig1_group1_999215_998250_len=966	fig|336988.4.peg.1027	Sucrose operon repressor ScrR2C LacI family			999215	998250	966	YP_809805.1	LacI family transcription regulator	28.06	310	206	7	13:906	7:311	2e-28	118
OKIT_1011	orf01123_AWRIB616_contig1_group1_1000433_999324_len=1110	fig|336988.4.peg.1028	Proline dipeptidase (EC 3.4.13.9);Ontology_term=KEGG_ENZYME:3.4.13.9			1000433	999324	1110	YP_810182.1	Mername-AA019 peptidase	84.82	369	56	0	1:1107	1:369	0.0	654
OKIT_1012	orf01124_AWRIB616_contig1_group1_1000474_1001439_len=966	fig|336988.4.peg.1029	D-3-phosphoglycerate dehydrogenase (EC 1.1.1.95);Ontology_term=KEGG_ENZYME:1.1.1.95			1000474	1001439	966	YP_810183.1	phosphoglycerate dehydrogenase-like protein	73.77	324	82	1	1:963	1:324	1e-136	478
OKIT_1013	orf01125_AWRIB616_contig1_group1_1001439_1002350_len=912	fig|336988.4.peg.1030	Proline iminopeptidase (EC 3.4.11.5);Ontology_term=KEGG_ENZYME:3.4.11.5			1001439	1002350	912	YP_810184.1	tricorn interacting factor F1	92.08	303	24	0	1:909	1:303	3e-172	596
OKIT_1014	orf01126_AWRIB616_contig1_group1_1002401_1002985_len=585	fig|336988.4.peg.1031	Holliday junction DNA helicase RuvA			1002401	1002985	585	YP_810185.1	Holliday junction resolvasome, DNA-binding	73.71	194	51	0	1:582	1:194	1e-77	280
OKIT_1015	orf01127_AWRIB616_contig1_group1_1002982_1004001_len=1020	fig|336988.4.peg.1032	Holliday junction DNA helicase RuvB			1002982	1004001	1020	YP_810186.1	Holliday junction DNA helicase B	89.02	337	37	0	1:1011	1:337	5e-171	592
OKIT_1016	orf01129_AWRIB616_contig1_group1_1004019_1004636_len=618	fig|336988.4.peg.1033	Pyrrolidone-carboxylate peptidase (EC 3.4.19.3);Ontology_term=KEGG_ENZYME:3.4.19.3			1004019	1004636	618	No_hit
OKIT_1017	orf01130_AWRIB616_contig1_group1_1004629_1005708_len=1080	fig|336988.4.peg.1034	S-adenosylmethionine:tRNA ribosyltransferase-isomerase (EC 5.-.-.-);Ontology_term=KEGG_ENZYME:5.-.-.-			1004629	1005708	1080	YP_810187.1	S-adenosylmethionine:tRNA-ribosyltransferase-	89.42	359	38	0	1:1077	1:359	0.0	674
OKIT_1018	orf01131_AWRIB616_contig1_group1_1005766_1006749_len=984	fig|336988.4.peg.1035	penicillin acylase			1005766	1006749	984	YP_810188.1	penicillin V acylase or related amidase	63.31	308	113	0	58:981	1:308	4e-113	399
OKIT_1019	orf01133_AWRIB616_contig1_group1_1006804_1008654_len=1851	fig|336988.4.peg.1036	Translation elongation factor LepA			1006804	1008654	1851	YP_810189.1	GTP-binding protein LepA	87.01	616	80	0	1:1848	8:623	0.0	1070
OKIT_1020	orf01134_AWRIB616_contig1_group1_1008651_1009349_len=699	fig|336988.4.peg.1037	hypothetical protein			1008651	1009349	699	YP_810191.1	hypothetical protein	46.21	145	77	1	259:693	1:144	5e-33	133
OKIT_1021	orf01135_AWRIB616_contig1_group1_1009342_1010403_len=1062	fig|336988.4.peg.1038	Bifunctional protein: zinc-containing alcohol dehydrogenase%3B quinone oxidoreductase ( NADPH:quinone reductase) (EC 1.1.1.-)%3B Similar to arginate lyase;Ontology_term=KEGG_ENZYME:1.1.1.-			1009342	1010403	1062	YP_810192.1	NADPH:quinone reductase or related Zn-dependent	62.78	352	130	1	4:1056	3:354	8e-127	445
OKIT_1022	orf01136_AWRIB616_contig1_group1_1010425_1011186_len=762	fig|336988.4.peg.1039	Ribosomal RNA small subunit methyltransferase E (EC 2.1.1.-);Ontology_term=KEGG_ENZYME:2.1.1.-			1010425	1011186	762	YP_810193.1	hypothetical protein	58.50	253	105	0	1:759	1:253	4e-81	293
OKIT_1023	orf01137_AWRIB616_contig1_group1_1011190_1011591_len=402	fig|336988.4.peg.1040	FIG00885782: hypothetical protein			1011190	1011591	402	YP_810194.1	hypothetical protein	68.42	133	41	1	1:396	1:133	2e-51	193
OKIT_1024	orf01138_AWRIB616_contig1_group1_1011588_1013837_len=2250	fig|336988.4.peg.1041	GTP pyrophosphokinase (EC 2.7.6.5)2C (p)ppGpp synthetase I;Ontology_term=KEGG_ENZYME:2.7.6.5			1011588	1013837	2250	YP_810195.1	guanosine polyphosphate	88.24	748	88	0	4:2247	1:748	0.0	1352
OKIT_1025	orf01139_AWRIB616_contig1_group1_1014858_1013869_len=990	fig|336988.4.peg.1042	N-acetylmuramoyl-L-alanine amidase (EC 3.5.1.28);Ontology_term=KEGG_ENZYME:3.5.1.28			1014858	1013869	990	YP_810196.1	N-acetylmuramoyl-L-alanine amidase	60.25	317	123	2	40:987	1:315	4e-113	399
OKIT_1026	orf01140_AWRIB616_contig1_group1_1014863_1016131_len=1269	fig|336988.4.peg.1043	Histidyl-tRNA synthetase (EC 6.1.1.21);Ontology_term=KEGG_ENZYME:6.1.1.21			1014863	1016131	1269	YP_810197.1	histidyl-tRNA synthetase	79.86	422	85	0	1:1266	1:422	0.0	689
OKIT_1027	orf01142_AWRIB616_contig1_group1_1016128_1017903_len=1776	fig|336988.4.peg.1044	Aspartyl-tRNA synthetase (EC 6.1.1.12);Ontology_term=KEGG_ENZYME:6.1.1.12			1016128	1017903	1776	YP_810198.1	aspartyl-tRNA synthetase	85.62	591	85	0	1:1773	1:591	0.0	1040
OKIT_1028	orf01143_AWRIB616_contig1_group1_1017968_1019866_len=1899	fig|336988.4.peg.1045	acyltransferase (putative)			1017968	1019866	1899	No_hit
OKIT_1029	orf01144_AWRIB616_contig1_group1_1020027_1020800_len=774	fig|336988.4.peg.1046	FIG00886104: hypothetical protein			1020027	1020800	774	YP_810200.1	hypothetical protein	57.48	127	52	1	391:771	3:127	2e-35	141
OKIT_1030	orf01145_AWRIB616_contig1_group1_1021030_1021338_len=309	fig|336988.4.peg.1047	SSU ribosomal protein S10p (S20e)			1021030	1021338	309	YP_810201.1	SSU ribosomal protein S10P	96.08	102	4	0	1:306	1:102	2e-52	195
OKIT_1031	orf01146_AWRIB616_contig1_group1_1021358_1022089_len=732	fig|336988.4.peg.1048	LSU ribosomal protein L3p (L3e)			1021358	1022089	732	YP_810202.1	50S ribosomal protein L3P	81.38	247	42	1	1:729	1:247	9e-115	404
OKIT_1032	orf01147_AWRIB616_contig1_group1_1022104_1022727_len=624	fig|336988.4.peg.1049	LSU ribosomal protein L4p (L1e)			1022104	1022727	624	YP_810203.1	50S ribosomal protein L4P	79.61	206	42	0	1:618	1:206	4e-93	332
OKIT_1033	orf01148_AWRIB616_contig1_group1_1022727_1023026_len=300	fig|336988.4.peg.1050	LSU ribosomal protein L23p (L23Ae)			1022727	1023026	300	YP_810204.1	50S ribosomal protein L23P	84.85	99	15	0	1:297	1:99	1e-44	169
OKIT_1034	orf01149_AWRIB616_contig1_group1_1023041_1023880_len=840	fig|336988.4.peg.1051	LSU ribosomal protein L2p (L8e)			1023041	1023880	840	YP_810205.1	50S ribosomal protein L2	94.98	279	14	0	1:837	1:279	9e-157	544
OKIT_1035	orf01150_AWRIB616_contig1_group1_1023893_1024174_len=282	fig|336988.4.peg.1052	SSU ribosomal protein S19p (S15e)			1023893	1024174	282	YP_810206.1	SSU ribosomal protein S19P	95.70	93	4	0	1:279	1:93	6e-50	187
OKIT_1036	orf01151_AWRIB616_contig1_group1_1024185_1024547_len=363	fig|336988.4.peg.1053	LSU ribosomal protein L22p (L17e)			1024185	1024547	363	YP_810207.1	50S ribosomal protein L22P	92.50	120	9	0	1:360	1:120	2e-60	222
OKIT_1037	orf01152_AWRIB616_contig1_group1_1024550_1025365_len=816	fig|336988.4.peg.1054	SSU ribosomal protein S3p (S3e)			1024550	1025365	816	YP_810208.1	SSU ribosomal protein S3P	85.98	271	34	3	1:813	1:267	6e-132	462
OKIT_1038	orf01153_AWRIB616_contig1_group1_1025365_1025796_len=432	fig|336988.4.peg.1055	LSU ribosomal protein L16p (L10e)			1025365	1025796	432	YP_810209.1	50S ribosomal protein L16	93.01	143	10	0	1:429	1:143	1e-76	277
OKIT_1039	orf01154_AWRIB616_contig1_group1_1025796_1026005_len=210	fig|336988.4.peg.1056	LSU ribosomal protein L29p (L35e)			1025796	1026005	210	YP_810210.1	50S ribosomal protein L29P	94.20	69	4	0	1:207	1:69	2e-30	122
OKIT_1040	orf01155_AWRIB616_contig1_group1_1026016_1026282_len=267	fig|336988.4.peg.1057	SSU ribosomal protein S17p (S11e)			1026016	1026282	267	YP_810211.1	SSU ribosomal protein S17P	89.77	88	9	0	1:264	1:88	5e-42	160
OKIT_1041	orf01156_AWRIB616_contig1_group1_1026304_1026672_len=369	fig|336988.4.peg.1058	LSU ribosomal protein L14p (L23e)			1026304	1026672	369	YP_810212.1	50S ribosomal protein L14P	96.72	122	4	0	1:366	1:122	1e-62	230
OKIT_1042	orf01157_AWRIB616_contig1_group1_1026684_1026953_len=270	fig|336988.4.peg.1059	LSU ribosomal protein L24p (L26e)			1026684	1026953	270	YP_810213.1	50S ribosomal protein L24P	82.02	89	16	0	1:267	1:89	8e-39	150
OKIT_1043	orf01158_AWRIB616_contig1_group1_1026972_1027514_len=543	fig|336988.4.peg.1060	LSU ribosomal protein L5p (L11e)			1026972	1027514	543	YP_810214.1	50S ribosomal protein L5	93.33	180	12	0	1:540	1:180	9e-92	327
OKIT_1044	orf01159_AWRIB616_contig1_group1_1027635_1028036_len=402	fig|336988.4.peg.1061	SSU ribosomal protein S8p (S15Ae)			1027635	1028036	402	YP_810215.1	SSU ribosomal protein S8P	87.97	133	16	0	1:399	1:133	3e-65	239
OKIT_1045	orf01161_AWRIB616_contig1_group1_1028076_1028612_len=537	fig|336988.4.peg.1062	LSU ribosomal protein L6p (L9e)			1028076	1028612	537	YP_810216.1	50S ribosomal protein L6P	85.96	178	25	0	1:534	1:178	2e-86	310
OKIT_1046	orf01162_AWRIB616_contig1_group1_1028644_1029000_len=357	fig|336988.4.peg.1063	LSU ribosomal protein L18p (L5e)			1028644	1029000	357	YP_810217.1	50S ribosomal protein L18P	91.53	118	10	0	1:354	1:118	2e-57	213
OKIT_1047	orf01163_AWRIB616_contig1_group1_1029019_1029516_len=498	fig|336988.4.peg.1064	SSU ribosomal protein S5p (S2e)			1029019	1029516	498	YP_810218.1	SSU ribosomal protein S5P	92.73	165	12	0	1:495	1:165	8e-84	301
OKIT_1048	orf01164_AWRIB616_contig1_group1_1029527_1029709_len=183	fig|336988.4.peg.1065	LSU ribosomal protein L30p (L7e)			1029527	1029709	183	YP_810219.1	50S ribosomal protein L30	95.00	60	3	0	1:180	1:60	3e-27	111
OKIT_1049	orf01165_AWRIB616_contig1_group1_1029710_1030171_len=462	fig|336988.4.peg.1066	LSU ribosomal protein L15p (L27Ae)			1029710	1030171	462	YP_810220.1	50S ribosomal protein L15P	80.52	154	29	1	1:459	1:154	7e-66	241
OKIT_1050	orf01166_AWRIB616_contig1_group1_1030134_1031522_len=1389	fig|336988.4.peg.1067	Preprotein translocase secY subunit (TC 3.A.5.1.1)			1030134	1031522	1389	YP_810221.1	protein translocase subunit secY/sec61 alpha	91.07	448	40	0	43:1386	1:448	0.0	815
OKIT_1051	orf01167_AWRIB616_contig1_group1_1031524_1032090_len=567	fig|336988.4.peg.1068	Adenylate kinase (EC 2.7.4.3);Ontology_term=KEGG_ENZYME:2.7.4.3			1031524	1032090	567	YP_810222.1	adenylate kinase	72.87	188	51	0	1:564	1:188	6e-79	285
OKIT_1052	orf01168_AWRIB616_contig1_group1_1032159_1032377_len=219	fig|336988.4.peg.1069	Translation initiation factor 1			1032159	1032377	219	YP_810223.1	translation initiation factor 1	97.22	72	2	0	1:216	1:72	3e-36	141
OKIT_1053	orf01169_AWRIB616_contig1_group1_1032596_1032967_len=372	fig|336988.4.peg.1071	SSU ribosomal protein S13p (S18e)			1032596	1032967	372	YP_810225.1	30S ribosomal protein S13	96.75	123	4	0	1:369	1:123	9e-65	237
OKIT_1054	orf01170_AWRIB616_contig1_group1_1032995_1033393_len=399	fig|336988.4.peg.1072	SSU ribosomal protein S11p (S14e)			1032995	1033393	399	YP_810226.1	30S ribosomal protein S11	95.45	132	6	0	1:396	1:132	4e-68	248
OKIT_1055	orf01171_AWRIB616_contig1_group1_1033418_1034365_len=948	fig|336988.4.peg.1073	DNA-directed RNA polymerase alpha subunit (EC 2.7.7.6);Ontology_term=KEGG_ENZYME:2.7.7.6			1033418	1034365	948	YP_810227.1	DNA-directed RNA polymerase, alpha subunit/40 kD	94.90	314	16	0	1:942	1:314	7e-169	585
OKIT_1056	orf01172_AWRIB616_contig1_group1_1034392_1034787_len=396	fig|336988.4.peg.1074	LSU ribosomal protein L17p			1034392	1034787	396	YP_810228.1	50S ribosomal protein L17P	94.66	131	7	0	1:393	1:131	1e-66	243
OKIT_1057	orf01173_AWRIB616_contig1_group1_1034881_1035681_len=801	fig|336988.4.peg.1075	ATPase component of general energizing module of ECF transporters			1034881	1035681	801	YP_810230.1	ABC-type cobalt transport system, ATPase	66.54	266	89	0	1:798	2:267	7e-101	358
OKIT_1058	orf01174_AWRIB616_contig1_group1_1035657_1036472_len=816	fig|336988.4.peg.1076	ATPase component of general energizing module of ECF transporters			1035657	1036472	816	YP_810231.1	ABC-type cobalt transport system, ATPase	60.22	274	106	1	1:813	1:274	1e-92	331
OKIT_1059	orf01175_AWRIB616_contig1_group1_1036465_1037256_len=792	fig|336988.4.peg.1077	Transmembrane component of general energizing module of ECF transporters			1036465	1037256	792	YP_810232.1	ABC-type cobalt transport system, permease	66.03	262	89	0	1:786	1:262	7e-98	348
OKIT_1060	orf01176_AWRIB616_contig1_group1_1037261_1038019_len=759	fig|336988.4.peg.1078	tRNA pseudouridine synthase A (EC 4.2.1.70);Ontology_term=KEGG_ENZYME:4.2.1.70			1037261	1038019	759	YP_810233.1	pseudouridylate synthase	81.75	252	46	0	1:756	1:252	2e-121	426
OKIT_1061	orf01177_AWRIB616_contig1_group1_1038003_1038854_len=852	fig|336988.4.peg.1079	FIG00886272: hypothetical protein			1038003	1038854	852	YP_810234.1	hypothetical protein	66.67	282	93	1	1:846	1:281	3e-110	390
OKIT_1062	orf01178_AWRIB616_contig1_group1_1038948_1039394_len=447	fig|336988.4.peg.1080	LSU ribosomal protein L13p (L13Ae)			1038948	1039394	447	YP_810235.1	50S ribosomal protein L13	87.16	148	19	0	1:444	1:148	1e-72	263
OKIT_1063	orf01179_AWRIB616_contig1_group1_1039413_1039805_len=393	fig|336988.4.peg.1081	SSU ribosomal protein S9p (S16e)			1039413	1039805	393	YP_810236.1	SSU ribosomal protein S9P	96.15	130	5	0	1:390	1:130	2e-67	246
OKIT_1064	orf01180_AWRIB616_contig1_group1_1039924_1041030_len=1107	fig|336988.4.peg.1082	Putrescine transport ATP-binding protein PotA (TC 3.A.1.11.1)			1039924	1041030	1107	YP_810237.1	ABC-type spermidine/putrescine transport system,	93.46	367	24	0	1:1101	6:372	0.0	680
OKIT_1065	orf01181_AWRIB616_contig1_group1_1041027_1041848_len=822	fig|336988.4.peg.1083	Spermidine Putrescine ABC transporter permease component PotB (TC 3.A.1.11.1)			1041027	1041848	822	YP_810238.1	spermidine/putrescine ABC transporter permease	82.35	272	48	0	1:816	1:272	6e-131	458
OKIT_1066	orf01182_AWRIB616_contig1_group1_1041845_1042651_len=807	fig|336988.4.peg.1084	Spermidine Putrescine ABC transporter permease component potC (TC_3.A.1.11.1)			1041845	1042651	807	YP_810239.1	spermidine/putrescine ABC transporter permease	82.09	268	48	0	1:804	1:268	4e-125	439
OKIT_1067	orf01183_AWRIB616_contig1_group1_1042648_1043736_len=1089	fig|336988.4.peg.1085	ABC transporter2C periplasmic spermidine putrescine-binding protein PotD (TC 3.A.1.11.1)			1042648	1043736	1089	YP_810240.1	spermidine/putrescine-binding periplasmic	79.61	363	73	1	1:1086	1:363	1e-176	611
OKIT_1068	orf01184_AWRIB616_contig1_group1_1043775_1044638_len=864	fig|336988.4.peg.1086	permease of the drug/metabolite transporter (DMT) superfamily			1043775	1044638	864	YP_810241.1	DMT family permease	67.48	286	93	0	1:858	14:299	4e-112	396
OKIT_1069	orf01185_AWRIB616_contig1_group1_1044747_1046552_len=1806	fig|336988.4.peg.1087	Glucosamine--fructose-6-phosphate aminotransferase [isomerizing] (EC 2.6.1.16);Ontology_term=KEGG_ENZYME:2.6.1.16			1044747	1046552	1806	YP_810242.1	D-fructose-6-phosphate amidotransferase	81.53	601	111	0	1:1803	1:601	0.0	989
OKIT_1070	orf01186_AWRIB616_contig1_group1_1046563_1047879_len=1317	fig|336988.4.peg.1088	Glucose-6-phosphate isomerase (EC 5.3.1.9);Ontology_term=KEGG_ENZYME:5.3.1.9			1046563	1047879	1317	YP_810243.1	glucose-6-phosphate isomerase	92.01	438	35	0	1:1314	1:438	0.0	808
OKIT_1071	orf01187_AWRIB616_contig1_group1_1047915_1048232_len=318	fig|336988.4.peg.1089	PlcB2C ORFX2C ORFP2C ORFB2C ORFA2C ldh gene			1047915	1048232	318	YP_810244.1	hypothetical protein	86.67	105	14	0	1:315	1:105	2e-47	179
OKIT_1072	orf01188_AWRIB616_contig1_group1_1048405_1049619_len=1215	fig|336988.4.peg.1090	Phosphoglycerate kinase (EC 2.7.2.3);Ontology_term=KEGG_ENZYME:2.7.2.3			1048405	1049619	1215	YP_810245.1	phosphoglycerate kinase	91.83	404	33	0	1:1212	1:404	0.0	738
OKIT_1073	orf01189_AWRIB616_contig1_group1_1049927_1049676_len=252	fig|336988.4.peg.1091	hypothetical protein			1049927	1049676	252	YP_810246.1	hypothetical protein	62.20	82	31	0	4:249	11:92	5e-25	104
OKIT_1074	orf01190_AWRIB616_contig1_group1_1052236_1050113_len=2124	fig|336988.4.peg.1092	ATP-dependent Clp protease ATP-binding subunit ClpA			1052236	1050113	2124	YP_810247.1	ATP-binding subunit of Clp protease and	85.71	707	101	0	1:2121	16:722	0.0	1198
OKIT_1075	orf01192_AWRIB616_contig1_group1_1052414_1053103_len=690	fig|336988.4.peg.1093	hypothetical protein2C lipoprotein			1052414	1053103	690	YP_810248.1	lipoprotein	48.67	226	114	1	1:672	1:226	1e-57	215
OKIT_1076	orf01193_AWRIB616_contig1_group1_1053100_1053288_len=189	fig|336988.4.peg.1094	hypothetical protein			1053100	1053288	189	YP_810249.1	hypothetical protein	67.74	62	20	0	1:186	1:62	7e-22	94.0
OKIT_1077	orf01194_AWRIB616_contig1_group1_1053401_1053664_len=264	fig|336988.4.peg.1095	Phosphocarrier protein of PTS system			1053401	1053664	264	YP_810250.1	phosphocarrier protein HPr	96.55	87	3	0	1:261	1:87	9e-43	163
OKIT_1078	orf01195_AWRIB616_contig1_group1_1054513_1053806_len=708	fig|336988.4.peg.1096	Glucosamine-6-phosphate deaminase (EC 3.5.99.6);Ontology_term=KEGG_ENZYME:3.5.99.6			1054513	1053806	708	YP_810251.1	glucosamine-6-phosphate isomerase	71.49	235	67	0	1:705	1:235	9e-99	351
OKIT_1079	orf01196_AWRIB616_contig1_group1_1054805_1055605_len=801	fig|336988.4.peg.1097	hydrolase2C HAD superfamily2C Cof family			1054805	1055605	801	YP_810252.1	HAD superfamily hydrolase	68.16	267	84	1	1:798	1:267	6e-102	362
OKIT_1080	orf01197_AWRIB616_contig1_group1_1055820_1057547_len=1728	fig|336988.4.peg.1098	Phosphoenolpyruvate-protein phosphotransferase of PTS system (EC 2.7.3.9);Ontology_term=KEGG_ENZYME:2.7.3.9			1055820	1057547	1728	YP_810253.1	phosphoenolpyruvate--protein phosphotransferase	84.35	575	90	0	1:1725	1:575	0.0	964
OKIT_1081	orf01198_AWRIB616_contig1_group1_1057602_1058897_len=1296	fig|336988.4.peg.1099	Glycosyltransferase LafA2C responsible for the formation of Glc-DAG			1057602	1058897	1296	YP_810254.1	1,2-diacylglycerol 3-glucosyltransferase	80.97	431	82	0	1:1293	1:431	0.0	695
OKIT_1082	orf01199_AWRIB616_contig1_group1_1058911_1059942_len=1032	fig|336988.4.peg.1100	Glycosyltransferase LafB2C responsible for the formation of Gal-Glc-DAG			1058911	1059942	1032	YP_810255.1	glycosyltransferase	81.63	343	63	0	1:1029	1:343	4e-167	579
OKIT_1083	orf01200_AWRIB616_contig1_group1_1059939_1060967_len=1029	fig|336988.4.peg.1101	Integral membrane protein LafC2C accessory function in glycolipid and LTA synthesis			1059939	1060967	1029	YP_810256.1	integral membrane protein	77.19	342	78	0	1:1026	1:342	3e-160	556
OKIT_1084	orf01201_AWRIB616_contig1_group1_1060954_1061208_len=255	fig|336988.4.peg.1102	FIG00885714: hypothetical protein			1060954	1061208	255	YP_810257.1	hypothetical protein	78.82	85	17	1	1:252	1:85	1e-33	132
OKIT_1085	orf01203_AWRIB616_contig1_group1_1061208_1063442_len=2235	fig|336988.4.peg.1103	Lipoteichoic acid synthase LtaS Type IIa			1061208	1063442	2235	YP_810258.1	5S ribosomal RNA	77.60	741	164	1	1:2223	1:739	0.0	1176
OKIT_1086	orf01204_AWRIB616_contig1_group1_1063617_1063432_len=186	fig|336988.4.peg.1104	hypothetical protein			1063617	1063432	186	No_hit
OKIT_1087	rRNA	fig|336988.4.rna.1	Small Subunit Ribosomal RNA%3B ssuRNA%3B SSU rRNA			1063877	1065348
OKIT_1088	tRNA	fig|336988.4.rna.2	tRNA-Ala-TGC			1065508	1065580
OKIT_1089	rRNA	fig|336988.4.rna.3	Large Subunit Ribosomal RNA%3B lsuRNA%3B LSU rRNA			1065793	1068680
OKIT_1090	orf01205_AWRIB616_contig1_group1_1069036_1068854_len=183	fig|336988.4.peg.1107	hypothetical protein			1069036	1068854	183	No_hit
OKIT_1091	orf01206_AWRIB616_contig1_group1_1069063_1069914_len=852	fig|336988.4.peg.1108	2-Keto-3-deoxy-D-manno-octulosonate-8-phosphate synthase (EC 2.5.1.55);Ontology_term=KEGG_ENZYME:2.5.1.55			1069063	1069914	852	YP_810866.1	2-dehydro-3-deoxyphosphooctonate aldolase	82.27	282	50	0	4:849	3:284	4e-134	469
OKIT_1092	orf01207_AWRIB616_contig1_group1_1069901_1070854_len=954	fig|336988.4.peg.1109	Arabinose 5-phosphate isomerase (EC 5.3.1.13);Ontology_term=KEGG_ENZYME:5.3.1.13			1069901	1070854	954	YP_810865.1	sugar phosphate isomerase	82.97	317	54	0	1:951	1:317	9e-151	525
OKIT_1093	orf01208_AWRIB616_contig1_group1_1071021_1071608_len=588	fig|336988.4.peg.1110	CBS domain protein2C lmo1865 homolog			1071021	1071608	588	YP_810863.1	CBS domain-containing protein	71.50	193	55	0	1:579	13:205	4e-77	279
OKIT_1094	orf01209_AWRIB616_contig1_group1_1071741_1074377_len=2637	fig|336988.4.peg.1111	Pyruvate2Cphosphate dikinase (EC 2.7.9.1);Ontology_term=KEGG_ENZYME:2.7.9.1			1071741	1074377	2637	YP_810253.1	phosphoenolpyruvate--protein phosphotransferase	25.61	449	240	14	1261:2556	160:531	1e-27	117
OKIT_1095	orf01210_AWRIB616_contig1_group1_1074509_1075810_len=1302	fig|336988.4.peg.1112	D-glycerate transporter (predicted)			1074509	1075810	1302	YP_811004.1	H+/gluconate symporter or related permease	80.89	429	81	1	13:1296	4:432	0.0	646
OKIT_1096	orf01211_AWRIB616_contig1_group1_1075841_1076998_len=1158	fig|336988.4.peg.1113	Glycerate kinase (EC 2.7.1.31);Ontology_term=KEGG_ENZYME:2.7.1.31			1075841	1076998	1158	YP_811003.1	glycerate kinase	66.84	377	125	0	1:1131	1:377	1e-146	511
OKIT_1097	orf01212_AWRIB616_contig1_group1_1077006_1077500_len=495	fig|336988.4.peg.1114	Low temperature requirement C protein			1077006	1077500	495	YP_810900.1	16S ribosomal RNA	78.05	164	36	0	1:492	1:164	5e-70	255
OKIT_1098	orf01213_AWRIB616_contig1_group1_1077543_1078352_len=810	fig|336988.4.peg.1115	Phosphomethylpyrimidine kinase (EC 2.7.4.7);Ontology_term=KEGG_ENZYME:2.7.4.7			1077543	1078352	810	YP_810899.1	hydroxymethylpyrimidine/phosphomethylpyrimidine	71.05	266	77	0	10:807	7:272	2e-109	387
OKIT_1099	orf01214_AWRIB616_contig1_group1_1078373_1079239_len=867	fig|336988.4.peg.1116	integral membrane protein			1078373	1079239	867	YP_810898.1	hypothetical protein	84.72	288	44	0	1:864	1:288	3e-143	499
OKIT_1100	orf01215_AWRIB616_contig1_group1_1079438_1082104_len=2667	fig|336988.4.peg.1117	Calcium-transporting ATPase (EC 3.6.3.8);Ontology_term=KEGG_ENZYME:3.6.3.8			1079438	1082104	2667	YP_810894.1	cation transport ATPase	81.51	887	164	0	1:2661	1:887	0.0	1403
OKIT_1101	orf01216_AWRIB616_contig1_group1_1082106_1082549_len=444	fig|336988.4.peg.1118	hypothetical protein			1082106	1082549	444	YP_810893.1	hypothetical protein	50.68	146	72	0	1:438	1:146	3e-38	149
OKIT_1102	orf01217_AWRIB616_contig1_group1_1082552_1083034_len=483	fig|336988.4.peg.1119	Putative metallopeptidase (Zinc) SprT family			1082552	1083034	483	YP_810892.1	hypothetical protein	61.88	160	61	0	1:480	1:160	1e-56	210
OKIT_1103	orf01218_AWRIB616_contig1_group1_1083643_1083071_len=573	fig|336988.4.peg.1120	Ribosomal subunit interface protein			1083643	1083071	573	YP_810891.1	sigma 54 modulation protein / SSU ribosomal	84.74	190	29	0	1:570	1:190	8e-94	334
OKIT_1104	tRNA	fig|336988.4.rna.4	tRNA-Leu-AAG			1083828	1083911
OKIT_1105	orf01219_AWRIB616_contig1_group1_1084760_1084026_len=735	fig|336988.4.peg.1121	Ribosyl nicotinamide transporter2C PnuC-like			1084760	1084026	735	No_hit
OKIT_1106	orf01220_AWRIB616_contig1_group1_1085022_1085183_len=162	fig|336988.4.peg.1122	hypothetical protein			1085022	1085183	162	No_hit
OKIT_1107	orf01221_AWRIB616_contig1_group1_1085744_1085196_len=549	fig|336988.4.peg.1123	Serine acetyltransferase (EC 2.3.1.30);Ontology_term=KEGG_ENZYME:2.3.1.30			1085744	1085196	549	YP_811263.1	serine O-acetyltransferase	64.81	162	57	0	28:513	4:165	6e-60	222
OKIT_1108	orf01222_AWRIB616_contig1_group1_1086880_1085741_len=1140	fig|336988.4.peg.1124	Cystathionine gamma-lyase (EC 4.4.1.1);Ontology_term=KEGG_ENZYME:4.4.1.1			1086880	1085741	1140	YP_811264.1	cystathionine gamma-lyase	74.14	379	98	0	1:1137	1:379	2e-164	570
OKIT_1109	orf01223_AWRIB616_contig1_group1_1087817_1086906_len=912	fig|336988.4.peg.1125	Cystathionine beta-synthase (EC 4.2.1.22);Ontology_term=KEGG_ENZYME:4.2.1.22			1087817	1086906	912	YP_811265.1	cystathionine beta-synthase	82.18	303	54	0	1:909	1:303	1e-144	504
OKIT_1110	orf01224_AWRIB616_contig1_group1_1087880_1088041_len=162	fig|336988.4.peg.1126	hypothetical protein			1087880	1088041	162	No_hit
OKIT_1111	orf01225_AWRIB616_contig1_group1_1088114_1089295_len=1182	fig|336988.4.peg.1127	serine-type D-Ala-D-Ala carboxypeptidase( EC:3.4.16.4 );Ontology_term=KEGG_ENZYME:3.4.16.4			1088114	1089295	1182	No_hit
OKIT_1112	orf01226_AWRIB616_contig1_group1_1089530_1091290_len=1761	fig|336988.4.peg.1128	Pyruvate oxidase (EC 1.2.3.3);Ontology_term=KEGG_ENZYME:1.2.3.3			1089530	1091290	1761	YP_810514.1	pyruvate oxidase	82.59	586	102	0	1:1758	1:586	0.0	996
OKIT_1113	orf01227_AWRIB616_contig1_group1_1092299_1091370_len=930	fig|336988.4.peg.1129	L-lactate dehydrogenase (EC 1.1.1.27);Ontology_term=KEGG_ENZYME:1.1.1.27			1092299	1091370	930	YP_810860.1	malate dehydrogenase (NAD)	80.07	306	61	0	1:918	1:306	7e-139	485
OKIT_1114	orf01228_AWRIB616_contig1_group1_1092533_1093894_len=1362	fig|336988.4.peg.1130	NADH peroxidase Npx (EC 1.11.1.1);Ontology_term=KEGG_ENZYME:1.11.1.1			1092533	1093894	1362	No_hit
OKIT_1115	orf01229_AWRIB616_contig1_group1_1093929_1095272_len=1344	fig|336988.4.peg.1131	ComF operon protein A2C DNA transporter ATPase			1093929	1095272	1344	No_hit
OKIT_1116	orf01230_AWRIB616_contig1_group1_1095262_1095945_len=684	fig|336988.4.peg.1133	ComF operon protein C			1095262	1095945	684	YP_810858.1	amidophosphoribosyltransferase	50.90	222	109	0	16:681	5:226	6e-66	242
OKIT_1117	orf01231_AWRIB616_contig1_group1_1096015_1098384_len=2370	fig|336988.4.peg.1134	Protein export cytoplasm protein SecA ATPase RNA helicase (TC 3.A.5.1.1)			1096015	1098384	2370	YP_810857.1	protein translocase subunit secA	90.47	787	75	0	1:2361	1:787	0.0	1426
OKIT_1118	orf01232_AWRIB616_contig1_group1_1098690_1098409_len=282	fig|336988.4.peg.1135	hypothetical protein			1098690	1098409	282	YP_810856.1	hypothetical protein	56.04	91	40	0	1:273	1:91	1e-27	112
OKIT_1119	orf01233_AWRIB616_contig1_group1_1099603_1098968_len=636	fig|336988.4.peg.1137	FIG000605: protein co-occurring with transport systems (COG1739)			1099603	1098968	636	YP_810854.1	hypothetical protein	55.98	209	92	0	7:633	3:211	2e-63	234
OKIT_1120	orf01234_AWRIB616_contig1_group1_1100889_1099600_len=1290	fig|336988.4.peg.1138	Uncharacterized ATPase (AAA family) associated with cysteine desulfurase			1100889	1099600	1290	YP_810751.1	recombination factor protein RarA	38.02	405	242	6	4:1200	14:415	3e-74	271
OKIT_1121	orf01236_AWRIB616_contig1_group1_1101128_1101541_len=414	fig|336988.4.peg.1139	SSU ribosomal protein S12p (S23e)			1101128	1101541	414	YP_810853.1	30S ribosomal protein S12	96.35	137	5	0	1:411	1:137	7e-75	271
OKIT_1122	orf01237_AWRIB616_contig1_group1_1101554_1102024_len=471	fig|336988.4.peg.1140	SSU ribosomal protein S7p (S5e)			1101554	1102024	471	YP_810852.1	30S ribosomal protein S7	97.44	156	4	0	1:468	1:156	2e-85	306
OKIT_1123	orf01239_AWRIB616_contig1_group1_1102039_1104150_len=2112	fig|336988.4.peg.1141	Translation elongation factor G			1102039	1104150	2112	YP_810851.1	translation elongation factor 2 (EF-2/EF-G)	95.57	700	31	0	10:2109	3:702	0.0	1339
OKIT_1124	orf01240_AWRIB616_contig1_group1_1104263_1105159_len=897	fig|336988.4.peg.1142	tRNA pseudouridine synthase B (EC 4.2.1.70);Ontology_term=KEGG_ENZYME:4.2.1.70			1104263	1105159	897	YP_810850.1	pseudouridine synthase	58.39	298	124	0	1:894	1:298	6e-106	375
OKIT_1125	orf01241_AWRIB616_contig1_group1_1105146_1106111_len=966	fig|336988.4.peg.1143	Riboflavin kinase (EC 2.7.1.26) / FMN adenylyltransferase (EC 2.7.7.2);Ontology_term=KEGG_ENZYME:2.7.1.26,KEGG_ENZYME:2.7.7.2			1105146	1106111	966	YP_810849.1	FMN adenylyltransferase / riboflavin kinase	59.74	308	123	1	1:924	1:307	5e-106	376
OKIT_1126	orf01242_AWRIB616_contig1_group1_1106642_1106112_len=531	fig|336988.4.peg.1144	Histone acetyltransferase HPA2 and related acetyltransferases			1106642	1106112	531	YP_810848.1	acetyltransferase	71.84	174	49	0	1:522	1:174	4e-72	262
OKIT_1127	orf01243_AWRIB616_contig1_group1_1106735_1107316_len=582	fig|336988.4.peg.1145	Heat shock protein GrpE			1106735	1107316	582	YP_810847.1	molecular chaperone GrpE (heat shock protein)	72.73	198	49	1	1:579	1:198	2e-77	280
OKIT_1128	orf01244_AWRIB616_contig1_group1_1107329_1109173_len=1845	fig|336988.4.peg.1146	Chaperone protein DnaK			1107329	1109173	1845	YP_810846.1	molecular chaperone	94.17	617	33	1	1:1842	1:617	0.0	1141
OKIT_1129	orf01246_AWRIB616_contig1_group1_1109207_1110142_len=936	fig|336988.4.peg.1147	Chaperone protein DnaJ			1109207	1110142	936	YP_810845.1	DnaJ-like molecular chaperone	82.32	311	53	2	1:933	1:309	2e-152	530
OKIT_1130	orf01247_AWRIB616_contig1_group1_1110159_1110464_len=306	fig|336988.4.peg.1148	FIG00886215: hypothetical protein			1110159	1110464	306	YP_810844.1	hypothetical protein	63.37	101	37	0	1:303	1:101	2e-34	135
OKIT_1131	orf01248_AWRIB616_contig1_group1_1112408_1110453_len=1956	fig|336988.4.peg.1149	Acylamino-acid-releasing enzyme (EC 3.4.19.1);Ontology_term=KEGG_ENZYME:3.4.19.1			1112408	1110453	1956	YP_810843.1	dipeptidyl	72.04	651	182	0	1:1953	1:651	0.0	1020
OKIT_1132	orf01249_AWRIB616_contig1_group1_1112626_1113114_len=489	fig|336988.4.peg.1150	FIG00885566: hypothetical protein			1112626	1113114	489	YP_810841.1	hypothetical protein	58.90	163	44	3	1:486	14:154	4e-48	182
OKIT_1133	orf01250_AWRIB616_contig1_group1_1113164_1113637_len=474	fig|336988.4.peg.1151	cytidine/deoxycytidylate deaminase			1113164	1113637	474	YP_810840.1	cytosine/adenosine deaminase	68.28	145	46	0	19:453	1:145	4e-57	212
OKIT_1134	orf01251_AWRIB616_contig1_group1_1113733_1115385_len=1653	fig|336988.4.peg.1152	Poly(glycerol-phosphate) alpha-glucosyltransferase (EC 2.4.1.52);Ontology_term=KEGG_ENZYME:2.4.1.52			1113733	1115385	1653	YP_810838.1	glycosyltransferase	61.45	550	210	2	1:1650	1:548	0.0	711
OKIT_1135	orf01252_AWRIB616_contig1_group1_1115385_1116917_len=1533	fig|336988.4.peg.1153	Poly(glycerol-phosphate) alpha-glucosyltransferase (EC 2.4.1.52);Ontology_term=KEGG_ENZYME:2.4.1.52			1115385	1116917	1533	YP_810837.1	glycosyltransferase	62.06	506	190	1	1:1518	2:505	0.0	656
OKIT_1136	orf01254_AWRIB616_contig1_group1_1117045_1118457_len=1413	fig|336988.4.peg.1154	Succinate-semialdehyde dehydrogenase [NAD] (EC 1.2.1.24)%3B Succinate-semialdehyde dehydrogenase [NADP+] (EC 1.2.1.16);Ontology_term=KEGG_ENZYME:1.2.1.24,KEGG_ENZYME:1.2.1.16			1117045	1118457	1413	YP_810836.1	NAD-dependent aldehyde dehydrogenase	82.44	467	82	0	1:1401	1:467	0.0	798
OKIT_1137	orf01255_AWRIB616_contig1_group1_1118878_1118534_len=345	fig|336988.4.peg.1155	hypothetical protein			1118878	1118534	345	YP_810835.1	hypothetical protein	57.26	117	41	3	1:342	1:111	7e-37	144
OKIT_1138	orf01256_AWRIB616_contig1_group1_1119427_1118903_len=525	fig|336988.4.peg.1156	transcriptional regulator			1119427	1118903	525	YP_810834.1	transcriptional regulator	81.03	174	33	0	1:522	1:174	1e-79	287
OKIT_1139	orf01257_AWRIB616_contig1_group1_1120605_1119571_len=1035	fig|336988.4.peg.1157	Branched-chain amino acid aminotransferase (EC 2.6.1.42);Ontology_term=KEGG_ENZYME:2.6.1.42			1120605	1119571	1035	YP_810833.1	branched-chain amino acid aminotransferase	90.09	343	34	0	1:1029	1:343	0.0	648
OKIT_1140	orf01258_AWRIB616_contig1_group1_1121934_1120663_len=1272	fig|336988.4.peg.1158	integral membrane protein (putative)			1121934	1120663	1272	No_hit
OKIT_1141	orf01260_AWRIB616_contig1_group1_1122302_1122511_len=210	fig|336988.4.peg.1159	hypothetical protein			1122302	1122511	210	YP_810832.1	hypothetical protein	60.29	68	27	0	4:207	3:70	3e-22	95.1
OKIT_1142	orf01261_AWRIB616_contig1_group1_1123177_1122512_len=666	fig|336988.4.peg.1160	Phosphoglycerate mutase family			1123177	1122512	666	YP_810831.1	phosphoglycerate mutase family protein	74.21	221	57	0	1:663	1:221	2e-99	353
OKIT_1143	orf01262_AWRIB616_contig1_group1_1123218_1123991_len=774	fig|336988.4.peg.1161	Esterase/lipase			1123218	1123991	774	YP_810830.1	esterase/lipase	66.80	253	84	0	1:759	1:253	9e-103	365
OKIT_1144	orf01264_AWRIB616_contig1_group1_1124010_1124339_len=330	fig|336988.4.peg.1162	hypothetical protein			1124010	1124339	330	YP_810829.1	hypothetical protein	57.80	109	46	0	1:327	1:109	2e-36	142
OKIT_1145	orf01265_AWRIB616_contig1_group1_1125051_1124341_len=711	fig|336988.4.peg.1163	Quinone oxidoreductase (EC 1.6.5.5);Ontology_term=KEGG_ENZYME:1.6.5.5			1125051	1124341	711	YP_810828.1	NADPH:quinone reductase or related Zn-dependent	59.57	235	95	0	1:705	69:303	5e-80	289
OKIT_1146	orf01266_AWRIB616_contig1_group1_1125279_1125118_len=162	fig|336988.4.peg.1164	hypothetical protein			1125279	1125118	162	No_hit
OKIT_1147	orf01267_AWRIB616_contig1_group1_1125373_1126287_len=915	fig|336988.4.peg.1165	L-lactate dehydrogenase (EC 1.1.1.27);Ontology_term=KEGG_ENZYME:1.1.1.27			1125373	1126287	915	YP_810163.1	malate dehydrogenase (NAD)	72.70	304	83	0	1:912	1:304	4e-130	456
OKIT_1148	orf01268_AWRIB616_contig1_group1_1126330_1127475_len=1146	fig|336988.4.peg.1166	tRNA-guanine transglycosylase (EC 2.4.2.29);Ontology_term=KEGG_ENZYME:2.4.2.29			1126330	1127475	1146	YP_810827.1	queuine/archaeosine tRNA-ribosyltransferase	88.47	347	40	0	103:1143	1:347	0.0	629
OKIT_1149	orf01269_AWRIB616_contig1_group1_1127512_1127895_len=384	fig|336988.4.peg.1167	Preprotein translocase subunit YajC (TC 3.A.5.1.1)			1127512	1127895	384	YP_810826.1	protein translocase subunit yajC	61.67	120	45	1	1:357	1:120	4e-40	155
OKIT_1150	orf01270_AWRIB616_contig1_group1_1127935_1128627_len=693	fig|336988.4.peg.1168	FIG002379: metal-dependent hydrolase			1127935	1128627	693	YP_810825.1	beta-lactamase superfamily hydrolase	79.13	230	48	0	1:690	1:230	2e-110	390
OKIT_1151	orf01271_AWRIB616_contig1_group1_1128646_1129593_len=948	fig|336988.4.peg.1169	FIG146085: 3-to-5 oligoribonuclease A2C Bacillus type			1128646	1129593	948	YP_810824.1	phosphoesterase, DHH family protein	83.28	311	52	0	1:933	11:321	2e-151	527
OKIT_1152	orf01272_AWRIB616_contig1_group1_1129733_1131103_len=1371	fig|336988.4.peg.1170	ATP-dependent RNA helicase YqfR			1129733	1131103	1371	YP_810823.1	superfamily II DNA/RNA helicase	80.57	453	88	0	1:1359	1:453	0.0	731
OKIT_1153	orf01274_AWRIB616_contig1_group1_1131422_1131156_len=267	fig|336988.4.peg.1171	SSU ribosomal protein S20p			1131422	1131156	267	YP_810822.1	SSU ribosomal protein S20P	87.50	88	11	0	1:264	1:88	2e-38	148
OKIT_1154	orf01275_AWRIB616_contig1_group1_1131710_1131441_len=270	fig|336988.4.peg.1172	SSU ribosomal protein S15p (S13e)			1131710	1131441	270	YP_810821.1	SSU ribosomal protein S15P	92.13	89	7	0	1:267	1:89	3e-42	161
OKIT_1155	orf01276_AWRIB616_contig1_group1_1131939_1133837_len=1899	fig|336988.4.peg.1173	Zn-dependent hydrolase2C RNA-metabolising2C CPSF 100 kDa analog			1131939	1133837	1899	YP_810820.1	metallo-beta-lactamase superfamily hydrolase	87.20	633	80	1	1:1896	4:636	0.0	1101
OKIT_1156	orf01277_AWRIB616_contig1_group1_1133830_1134789_len=960	fig|336988.4.peg.1174	FIG00885953: hypothetical protein			1133830	1134789	960	YP_810819.1	TPR repeat-containing protein	79.11	316	66	0	1:948	1:316	7e-148	515
OKIT_1157	orf01278_AWRIB616_contig1_group1_1135009_1135536_len=528	fig|336988.4.peg.1175	Translation initiation factor 3			1135009	1135536	528	YP_810818.1	translation initiation factor 3	89.14	175	19	0	1:525	40:214	3e-86	309
OKIT_1158	orf01279_AWRIB616_contig1_group1_1135517_1135714_len=198	fig|336988.4.peg.1176	LSU ribosomal protein L35p			1135517	1135714	198	YP_810817.1	50S ribosomal protein L35P	92.31	65	5	0	1:195	1:65	7e-32	127
OKIT_1159	orf01280_AWRIB616_contig1_group1_1135737_1136327_len=591	fig|336988.4.peg.1177	LSU ribosomal protein L20p			1135737	1136327	591	YP_810816.1	50S ribosomal protein L20P	84.18	196	31	0	1:588	1:196	2e-91	327
OKIT_1160	orf01281_AWRIB616_contig1_group1_1137415_1136399_len=1017	fig|336988.4.peg.1178	Foldase protein PrsA precursor (EC 5.2.1.8) @ Foldase clustered with pyrimidine conversion;Ontology_term=KEGG_ENZYME:5.2.1.8			1137415	1136399	1017	YP_810815.1	parvulin-like peptidyl-prolyl isomerase	62.31	337	126	1	1:1008	1:337	4e-120	423
OKIT_1161	orf01282_AWRIB616_contig1_group1_1137740_1137474_len=267	fig|336988.4.peg.1179	hypothetical protein			1137740	1137474	267	No_hit
OKIT_1162	orf01283_AWRIB616_contig1_group1_1138170_1137748_len=423	fig|336988.4.peg.1180	Histidine triad (HIT) nucleotide-binding protein2C similarity with At5g48545 and yeast YDL125C (HNT1)			1138170	1137748	423	YP_810813.1	diadenosine tetraphosphate (Ap4A) hydrolase and	69.78	139	42	0	1:417	1:139	1e-55	207
OKIT_1163	orf01284_AWRIB616_contig1_group1_1138212_1138943_len=732	fig|336988.4.peg.1181	ABC transporter2C ATP-binding protein EcsA			1138212	1138943	732	YP_810812.1	ABC-type multidrug transport system, ATPase	71.37	241	69	0	1:723	1:241	4e-102	362
OKIT_1164	orf01285_AWRIB616_contig1_group1_1138940_1139998_len=1059	fig|336988.4.peg.1182	ABC transporter2C permease protein EscB			1138940	1139998	1059	YP_810811.1	ABC transporter permease	52.56	352	167	0	1:1056	1:352	6e-110	389
OKIT_1165	orf01286_AWRIB616_contig1_group1_1139982_1140647_len=666	fig|336988.4.peg.1183	tRNA (guanine46-N7-)-methyltransferase (EC 2.1.1.33);Ontology_term=KEGG_ENZYME:2.1.1.33			1139982	1140647	666	YP_810810.1	S-adenosylmethionine-dependent	69.86	219	66	0	1:657	1:219	9e-93	331
OKIT_1166	orf01287_AWRIB616_contig1_group1_1140971_1140648_len=324	fig|336988.4.peg.1184	Predicted small secreted protein			1140971	1140648	324	YP_810809.1	hypothetical protein	60.61	99	39	0	1:297	1:99	3e-31	125
OKIT_1167	orf01288_AWRIB616_contig1_group1_1141011_1141619_len=609	fig|336988.4.peg.1185	tRNA binding domain protein			1141011	1141619	609	YP_810808.1	EMAP domain-containing protein	64.85	202	71	0	1:606	1:202	1e-71	261
OKIT_1168	orf01289_AWRIB616_contig1_group1_1141626_1142951_len=1326	fig|336988.4.peg.1186	UDP-N-acetylmuramate--alanine ligase (EC 6.3.2.8);Ontology_term=KEGG_ENZYME:6.3.2.8			1141626	1142951	1326	YP_810807.1	UDP-N-acetylmuramate--L-alanine ligase	74.54	436	110	1	1:1308	1:435	0.0	666
OKIT_1169	orf01290_AWRIB616_contig1_group1_1143020_1143742_len=723	fig|336988.4.peg.1187	Integral membrane protein2C interacts with FtsH			1143020	1143742	723	YP_810806.1	integral membrane protein, interacts with FtsH	75.42	240	59	0	1:720	1:240	1e-105	374
OKIT_1170	orf01293_AWRIB616_contig1_group1_1143854_1145368_len=1515	fig|336988.4.peg.1188	Peptide chain release factor 3			1143854	1145368	1515	YP_810805.1	peptide chain release factor 3	83.33	504	84	0	1:1512	1:504	0.0	864
OKIT_1171	orf01294_AWRIB616_contig1_group1_1145426_1146013_len=588	fig|336988.4.peg.1189	histone protein			1145426	1146013	588	No_hit
OKIT_1172	orf01295_AWRIB616_contig1_group1_1146529_1146053_len=477	fig|336988.4.peg.1190	Ribonuclease HI (EC 3.1.26.4);Ontology_term=KEGG_ENZYME:3.1.26.4			1146529	1146053	477	No_hit
OKIT_1173	orf01297_AWRIB616_contig1_group1_1146595_1147806_len=1212	fig|336988.4.peg.1191	Cell division protein FtsW			1146595	1147806	1212	YP_810800.1	cell division membrane protein	64.69	405	136	1	1:1194	5:409	3e-155	540
OKIT_1174	orf01298_AWRIB616_contig1_group1_1147803_1148375_len=573	fig|336988.4.peg.1192	Ribosomal RNA small subunit methyltransferase D (EC 2.1.1.-);Ontology_term=KEGG_ENZYME:2.1.1.-			1147803	1148375	573	YP_810799.1	N6-adenine-specific methylase	69.35	186	57	0	1:558	1:186	6e-73	265
OKIT_1175	orf01299_AWRIB616_contig1_group1_1148368_1148841_len=474	fig|336988.4.peg.1193	Phosphopantetheine adenylyltransferase (EC 2.7.7.3);Ontology_term=KEGG_ENZYME:2.7.7.3			1148368	1148841	474	YP_810798.1	phosphopantetheine adenylyltransferase	78.98	157	33	0	1:471	1:157	5e-69	251
OKIT_1176	orf01300_AWRIB616_contig1_group1_1148886_1149932_len=1047	fig|336988.4.peg.1194	Lon-like protease with PDZ domain			1148886	1149932	1047	YP_810797.1	Lon-like protease	72.99	348	94	0	1:1044	17:364	2e-147	514
OKIT_1177	orf01301_AWRIB616_contig1_group1_1150007_1150981_len=975	fig|336988.4.peg.1195	Late competence protein ComGA2C access of DNA to ComEA			1150007	1150981	975	No_hit
OKIT_1178	orf01302_AWRIB616_contig1_group1_1150971_1151960_len=990	fig|336988.4.peg.1196	Late competence protein ComGB2C access of DNA to ComEA			1150971	1151960	990	YP_810796.1	Type II secretory pathway/competence component	60.18	329	130	1	1:987	20:347	9e-109	385
OKIT_1179	orf01303_AWRIB616_contig1_group1_1151957_1152286_len=330	fig|336988.4.peg.1197	Late competence protein ComGC2C access of DNA to ComEA2C FIG007487			1151957	1152286	330	YP_810795.1	competence protein ComGC	64.22	109	39	0	1:327	1:109	5e-36	141
OKIT_1180	orf01304_AWRIB616_contig1_group1_1152273_1152689_len=417	fig|336988.4.peg.1198	Late competence protein ComGD2C access of DNA to ComEA2C FIG038316			1152273	1152689	417	YP_810794.1	Type II secretory pathway/competence,	50.44	113	56	0	76:414	2:114	2e-28	117
OKIT_1181	orf01305_AWRIB616_contig1_group1_1152682_1152864_len=183	fig|336988.4.peg.1199	hypothetical protein			1152682	1152864	183	No_hit
OKIT_1182	orf01306_AWRIB616_contig1_group1_1152845_1153288_len=444	fig|336988.4.peg.1200	Competence protein ComGF			1152845	1153288	444	YP_810792.1	competence protein ComGF	43.80	137	76	1	19:426	5:141	3e-30	122
OKIT_1183	orf01308_AWRIB616_contig1_group1_1153242_1153448_len=207	fig|336988.4.peg.1201	hypothetical protein			1153242	1153448	207	No_hit
OKIT_1184	orf01309_AWRIB616_contig1_group1_1153458_1154255_len=798	fig|336988.4.peg.1202	Adenine-specific methyltransferase (EC 2.1.1.72);Ontology_term=KEGG_ENZYME:2.1.1.72			1153458	1154255	798	No_hit
OKIT_1185	orf01311_AWRIB616_contig1_group1_1154262_1155455_len=1194	fig|336988.4.peg.1203	Acetate kinase (EC 2.7.2.1);Ontology_term=KEGG_ENZYME:2.7.2.1			1154262	1155455	1194	YP_810790.1	acetate kinase	80.86	397	76	0	1:1191	1:397	0.0	660
OKIT_1186	orf01312_AWRIB616_contig1_group1_1155586_1158282_len=2697	fig|336988.4.peg.1204	Alcohol dehydrogenase (EC 1.1.1.1)%3B Acetaldehyde dehydrogenase (EC 1.2.1.10);Ontology_term=KEGG_ENZYME:1.1.1.1,KEGG_ENZYME:1.2.1.10			1155586	1158282	2697	YP_810789.1	bifunctional acetaldehyde-CoA/alcohol	88.64	898	102	0	1:2694	1:898	0.0	1591
OKIT_1187	orf01313_AWRIB616_contig1_group1_1158422_1159213_len=792	fig|336988.4.peg.1205	FIG004453: protein YceG like			1158422	1159213	792	YP_810788.1	muramidase (flagellum-specific)	69.96	263	79	0	1:789	28:290	1e-108	384
OKIT_1188	orf01314_AWRIB616_contig1_group1_1159229_1159609_len=381	fig|336988.4.peg.1206	Hypothetical protein YaeR with similarity to glyoxylase family			1159229	1159609	381	No_hit
OKIT_1189	orf01316_AWRIB616_contig1_group1_1160148_1159660_len=489	fig|336988.4.peg.1207	Transcription elongation factor GreA			1160148	1159660	489	YP_810787.1	transcription elongation factor GreA	85.80	162	23	0	1:486	1:162	5e-76	275
OKIT_1190	orf01317_AWRIB616_contig1_group1_1162849_1160228_len=2622	fig|336988.4.peg.1208	Predicted membrane protein			1162849	1160228	2622	YP_810786.1	hypothetical protein	62.39	872	327	1	1:2616	1:871	0.0	1133
OKIT_1191	orf01318_AWRIB616_contig1_group1_1162884_1164959_len=2076	fig|336988.4.peg.1209	Penicillin-binding protein 2B			1162884	1164959	2076	YP_810785.1	cell division protein FtsI/penicillin-binding	65.01	686	237	2	25:2073	1:686	0.0	907
OKIT_1192	orf01319_AWRIB616_contig1_group1_1164959_1165921_len=963	fig|336988.4.peg.1210	ADP-ribosylglycohydrolase			1164959	1165921	963	YP_810784.1	ADP-ribosylglycohydrolase	78.96	309	65	0	34:960	1:309	4e-145	506
OKIT_1193	orf01320_AWRIB616_contig1_group1_1167670_1165955_len=1716	fig|336988.4.peg.1211	Zn-dependent hydrolase2C RNA-metabolising2C CPSF 73 kDa analog			1167670	1165955	1716	YP_810783.1	mRNA degradation ribonuclease J1/J2enzyme	91.77	571	47	0	1:1713	1:571	0.0	1056
OKIT_1194	orf01321_AWRIB616_contig1_group1_1167785_1168381_len=597	fig|336988.4.peg.1212	Predicted Rossmann fold nucleotide-binding protein			1167785	1168381	597	YP_810782.1	Rossmann fold nucleotide-binding protein	71.21	198	57	0	1:594	1:198	8e-84	301
OKIT_1195	orf01322_AWRIB616_contig1_group1_1168424_1168987_len=564	fig|336988.4.peg.1213	Translation elongation factor P			1168424	1168987	564	YP_810781.1	translation elongation factor P (EF-P)	91.44	187	16	0	1:561	1:187	2e-98	350
OKIT_1196	orf01323_AWRIB616_contig1_group1_1168989_1169525_len=537	fig|336988.4.peg.1214	Alkaline shock protein			1168989	1169525	537	YP_810780.1	hypothetical protein	76.67	180	38	2	1:528	1:180	1e-72	264
OKIT_1197	orf01324_AWRIB616_contig1_group1_1169530_1169922_len=393	fig|336988.4.peg.1215	Transcription termination protein NusB			1169530	1169922	393	YP_810779.1	transcription termination factor	80.77	130	25	0	1:390	1:130	2e-58	216
OKIT_1198	orf01326_AWRIB616_contig1_group1_1169929_1171146_len=1218	fig|336988.4.peg.1216	Exodeoxyribonuclease VII large subunit (EC 3.1.11.6);Ontology_term=KEGG_ENZYME:3.1.11.6			1169929	1171146	1218	YP_810778.1	exodeoxyribonuclease VII large subunit	73.20	403	108	0	7:1215	2:404	2e-168	584
OKIT_1199	orf01327_AWRIB616_contig1_group1_1171130_1171360_len=231	fig|336988.4.peg.1217	Exodeoxyribonuclease VII small subunit (EC 3.1.11.6);Ontology_term=KEGG_ENZYME:3.1.11.6			1171130	1171360	231	YP_810777.1	exodeoxyribonuclease VII small subunit	85.53	76	11	0	1:228	1:76	4e-34	134
OKIT_1200	orf01328_AWRIB616_contig1_group1_1171350_1172177_len=828	fig|336988.4.peg.1218	Geranyltranstransferase (farnesyldiphosphate synthase) (EC 2.5.1.10);Ontology_term=KEGG_ENZYME:2.5.1.10			1171350	1172177	828	YP_810776.1	farnesyl-diphosphate synthase	73.09	275	74	0	1:825	1:275	5e-118	416
OKIT_1201	orf01329_AWRIB616_contig1_group1_1172174_1173004_len=831	fig|336988.4.peg.1219	RNA binding methyltransferase FtsJ like			1172174	1173004	831	No_hit
OKIT_1202	orf01330_AWRIB616_contig1_group1_1173027_1174682_len=1656	fig|336988.4.peg.1220	DNA repair protein RecN			1173027	1174682	1656	YP_810775.1	DNA repair ATPase	69.69	551	167	0	1:1653	1:551	0.0	756
OKIT_1203	orf01331_AWRIB616_contig1_group1_1175027_1174707_len=321	fig|336988.4.peg.1221	FIG00885682: hypothetical protein			1175027	1174707	321	YP_810774.1	hypothetical protein	71.15	104	30	0	1:312	1:104	4e-38	148
OKIT_1204	orf01332_AWRIB616_contig1_group1_1175221_1175817_len=597	fig|336988.4.peg.1222	Guanylate kinase (EC 2.7.4.8);Ontology_term=KEGG_ENZYME:2.7.4.8			1175221	1175817	597	YP_810773.1	guanylate kinase	89.90	198	20	0	1:594	1:198	4e-101	358
OKIT_1205	orf01333_AWRIB616_contig1_group1_1175819_1176142_len=324	fig|336988.4.peg.1223	DNA-directed RNA polymerase omega subunit (EC 2.7.7.6);Ontology_term=KEGG_ENZYME:2.7.7.6			1175819	1176142	324	YP_810772.1	DNA-directed RNA polymerase, subunit K/omega	86.92	107	14	0	1:321	1:107	1e-49	186
OKIT_1206	orf01334_AWRIB616_contig1_group1_1176792_1176139_len=654	fig|336988.4.peg.1224	DedA protein			1176792	1176139	654	YP_810771.1	hypothetical protein	75.00	216	51	3	1:648	1:213	2e-92	330
OKIT_1207	orf01335_AWRIB616_contig1_group1_1176854_1177249_len=396	fig|336988.4.peg.1225	General stress protein 13			1176854	1177249	396	YP_810770.1	RNA-binding protein	78.63	131	28	0	1:393	1:131	1e-58	216
OKIT_1208	tRNA	fig|336988.4.rna.5	tRNA-Val-TAC			1177339	1177411
OKIT_1209	tRNA	fig|336988.4.rna.6	tRNA-Thr-TGT			1177446	1177518
OKIT_1210	tRNA	fig|336988.4.rna.7	tRNA-Gly-GCC			1177541	1177612
OKIT_1211	tRNA	fig|336988.4.rna.8	tRNA-Leu-TAA			1177634	1177717
OKIT_1212	tRNA	fig|336988.4.rna.9	tRNA-Arg-ACG			1177791	1177864
OKIT_1213	tRNA	fig|336988.4.rna.10	tRNA-Pro-TGG			1177929	1178002
OKIT_1214	tRNA	fig|336988.4.rna.11	tRNA-Met-CAT			1178024	1178097
OKIT_1215	tRNA	fig|336988.4.rna.12	tRNA-Met-CAT			1178111	1178184
OKIT_1216	tRNA	fig|336988.4.rna.13	tRNA-Ser-TGA			1178203	1178292
OKIT_1217	tRNA	fig|336988.4.rna.14	tRNA-Met-CAT			1178319	1178392
OKIT_1218	tRNA	fig|336988.4.rna.15	tRNA-Asp-GTC			1178449	1178523
OKIT_1219	tRNA	fig|336988.4.rna.16	tRNA-Phe-GAA			1178553	1178625
OKIT_1220	tRNA	fig|336988.4.rna.17	tRNA-Gly-TCC			1178645	1178715
OKIT_1221	tRNA	fig|336988.4.rna.18	tRNA-Ile-GAT			1178718	1178791
OKIT_1222	tRNA	fig|336988.4.rna.19	tRNA-Ser-GCT			1178860	1178949
OKIT_1223	orf01336_AWRIB616_contig1_group1_1179165_1179698_len=534	fig|336988.4.peg.1226	hypothetical protein			1179165	1179698	534	No_hit
OKIT_1224	orf01337_AWRIB616_contig1_group1_1180015_1180995_len=981	fig|336988.4.peg.1227	acyltransferase 3			1180015	1180995	981	No_hit
OKIT_1225	orf01338_AWRIB616_contig1_group1_1181188_1182576_len=1389	fig|336988.4.peg.1228	NADH oxidase (putative)			1181188	1182576	1389	No_hit
OKIT_1226	orf01339_AWRIB616_contig1_group1_1182671_1183645_len=975	fig|336988.4.peg.1229	GMP reductase (EC 1.7.1.7);Ontology_term=KEGG_ENZYME:1.7.1.7			1182671	1183645	975	YP_810148.1	guanosine 5-monophosphate oxidoreductase	94.12	323	19	0	1:969	1:323	1e-178	617
OKIT_1227	orf01340_AWRIB616_contig1_group1_1184984_1183653_len=1332	fig|336988.4.peg.1230	Xanthine permease			1184984	1183653	1332	YP_810149.1	xanthine/uracil permease	91.74	448	32	2	1:1329	1:448	0.0	790
OKIT_1228	orf01341_AWRIB616_contig1_group1_1185633_1184974_len=660	fig|336988.4.peg.1231	Xanthine phosphoribosyltransferase (EC 2.4.2.22);Ontology_term=KEGG_ENZYME:2.4.2.22			1185633	1184974	660	YP_810150.1	adenine/guanine phosphoribosyltransferase-like	81.46	205	38	0	43:657	2:206	4e-92	329
OKIT_1229	orf01342_AWRIB616_contig1_group1_1185951_1186421_len=471	fig|336988.4.peg.1232	Putative drug ABC exporter2C membrane-spanning/permease subunit			1185951	1186421	471	No_hit
OKIT_1230	orf01343_AWRIB616_contig1_group1_1186418_1186648_len=231	fig|336988.4.peg.1233	Transcriptional regulator2C Cro/CI family			1186418	1186648	231	No_hit
OKIT_1231	orf01344_AWRIB616_contig1_group1_1187003_1187740_len=738	fig|336988.4.peg.1235	Allophanate hydrolase 2 subunit 1 (EC 3.5.1.54);Ontology_term=KEGG_ENZYME:3.5.1.54			1187003	1187740	738	No_hit
OKIT_1232	orf01346_AWRIB616_contig1_group1_1187737_1188762_len=1026	fig|336988.4.peg.1236	Allophanate hydrolase 2 subunit 2 (EC 3.5.1.54);Ontology_term=KEGG_ENZYME:3.5.1.54			1187737	1188762	1026	No_hit
OKIT_1233	orf01347_AWRIB616_contig1_group1_1188765_1189187_len=423	fig|336988.4.peg.1237	Biotin carboxyl carrier protein of acetyl-CoA carboxylase			1188765	1189187	423	No_hit
OKIT_1234	orf01348_AWRIB616_contig1_group1_1189184_1190503_len=1320	fig|336988.4.peg.1238	Biotin carboxylase of acetyl-CoA carboxylase (EC 6.3.4.14);Ontology_term=KEGG_ENZYME:6.3.4.14			1189184	1190503	1320	YP_811102.1	biotin carboxylase	49.10	442	216	2	4:1302	3:444	6e-121	426
OKIT_1235	orf01349_AWRIB616_contig1_group1_1190515_1191315_len=801	fig|336988.4.peg.1239	hypothetical protein possibly connected to lactam utilization and allophanate hydrolase			1190515	1191315	801	No_hit
OKIT_1236	orf01350_AWRIB616_contig1_group1_1191327_1192076_len=750	fig|336988.4.peg.1240	Lactam utilization protein LamB			1191327	1192076	750	No_hit
OKIT_1237	orf01352_AWRIB616_contig1_group1_1192101_1193345_len=1245	fig|336988.4.peg.1241	Mn2+/Fe2+ transporter2C NRAMP family			1192101	1193345	1245	No_hit
OKIT_1238	orf01353_AWRIB616_contig1_group1_1193475_1194491_len=1017	fig|336988.4.peg.1242	Transcriptional regulator			1193475	1194491	1017	YP_809785.1	transcriptional regulator	59.27	248	101	0	58:801	1:248	2e-81	295
OKIT_1239	orf01354_AWRIB616_contig1_group1_1194726_1195889_len=1164	fig|336988.4.peg.1243	Predicted acyltransferase			1194726	1195889	1164	YP_810895.1	acyltransferase	73.92	372	97	0	19:1134	9:380	9e-174	601
OKIT_1240	orf01355_AWRIB616_contig1_group1_1195865_1197418_len=1554	fig|336988.4.peg.1244	Long-chain-fatty-acid--CoA ligase (EC 6.2.1.3);Ontology_term=KEGG_ENZYME:6.2.1.3			1195865	1197418	1554	YP_810897.1	Acyl-CoA synthetase (AMP-forming)/AMP-acid	62.63	487	177	2	100:1551	1:485	0.0	630
OKIT_1241	orf01356_AWRIB616_contig1_group1_1197418_1198434_len=1017	fig|336988.4.peg.1245	ABC-type nitrate/sulfonate/bicarbonate transport system2C periplasmic component			1197418	1198434	1017	No_hit
OKIT_1242	orf01358_AWRIB616_contig1_group1_1198434_1199201_len=768	fig|336988.4.peg.1246	Alkanesulfonates transport system permease protein			1198434	1199201	768	YP_810160.1	ABC-type nitrate/sulfonate/bicarbonate transport	56.44	225	98	0	82:756	4:228	2e-71	260
OKIT_1243	orf01359_AWRIB616_contig1_group1_1199201_1199917_len=717	fig|336988.4.peg.1247	Alkanesulfonates ABC transporter ATP-binding protein / Sulfonate ABC transporter2C ATP-binding subunit SsuB			1199201	1199917	717	YP_810161.1	ABC-type nitrate/sulfonate/bicarbonate transport	53.30	197	91	1	10:597	5:201	7e-54	202
OKIT_1244	orf01360_AWRIB616_contig1_group1_1200035_1200598_len=564	fig|336988.4.peg.1248	Dihydrofolate reductase (EC 1.5.1.3);Ontology_term=KEGG_ENZYME:1.5.1.3			1200035	1200598	564	No_hit
OKIT_1245	orf01361_AWRIB616_contig1_group1_1200857_1200633_len=225	fig|336988.4.peg.1249	hypothetical protein			1200857	1200633	225	No_hit
OKIT_1246	orf01362_AWRIB616_contig1_group1_1201672_1200950_len=723	fig|336988.4.peg.1250	Transcriptional regulator2C GntR family			1201672	1200950	723	YP_810768.1	GntR family transcriptional regulator	64.17	240	86	0	1:720	1:240	2e-89	320
OKIT_1247	orf01363_AWRIB616_contig1_group1_1201877_1203247_len=1371	fig|336988.4.peg.1251	6-phospho-beta-glucosidase (EC 3.2.1.86);Ontology_term=KEGG_ENZYME:3.2.1.86			1201877	1203247	1371	YP_810767.1	Beta-glucosidase/6-phospho-beta-	71.82	440	124	0	49:1368	1:440	0.0	696
OKIT_1248	orf01364_AWRIB616_contig1_group1_1203264_1204592_len=1329	fig|336988.4.peg.1252	PTS system2C cellobiose-specific IIC component (EC 2.7.1.69);Ontology_term=KEGG_ENZYME:2.7.1.69			1203264	1204592	1329	YP_809981.1	cellobiose-specific PTS system IIC component	28.77	424	278	9	43:1290	12:419	2e-52	199
OKIT_1249	orf01365_AWRIB616_contig1_group1_1204755_1205861_len=1107	fig|336988.4.peg.1253	permease of the major facilitator superfamily			1204755	1205861	1107	YP_809795.1	major facilitator superfamily permease	24.65	353	251	8	22:1059	44:388	8e-37	146
OKIT_1250	orf01366_AWRIB616_contig1_group1_1207873_1205858_len=2016	fig|336988.4.peg.1254	Kup system potassium uptake protein			1207873	1205858	2016	No_hit
OKIT_1251	orf01367_AWRIB616_contig1_group1_1208306_1208055_len=252	fig|336988.4.peg.1255	Organic hydroperoxide resistance transcriptional regulator			1208306	1208055	252	No_hit
OKIT_1252	orf01368_AWRIB616_contig1_group1_1208511_1209017_len=507	fig|336988.4.peg.1256	Esterase/lipase			1208511	1209017	507	No_hit
OKIT_1253	orf01369_AWRIB616_contig1_group1_1210863_1209067_len=1797	fig|336988.4.peg.1257	cadmium-/zinc-/cobalt-transporting ATPase( EC:3.6.3.- );Ontology_term=KEGG_ENZYME:3.6.3.-			1210863	1209067	1797	YP_809985.1	cation transport ATPase	29.87	596	401	6	34:1779	20:612	2e-85	308
OKIT_1254	orf01371_AWRIB616_contig1_group1_1211250_1210993_len=258	fig|336988.4.peg.1258	hypothetical protein			1211250	1210993	258	No_hit
OKIT_1255	orf01372_AWRIB616_contig1_group1_1212163_1211360_len=804	fig|336988.4.peg.1259	acetyltransferase2C GNAT family			1212163	1211360	804	YP_810506.1	acetyltransferase	43.48	115	64	1	457:801	1:114	1e-21	95.5
OKIT_1256	orf01373_AWRIB616_contig1_group1_1212830_1212153_len=678	fig|336988.4.peg.1260	ABC transporter ATP-binding protein			1212830	1212153	678	YP_810333.1	peptide ABC transporter ATPase	60.71	224	88	0	1:672	1:224	4e-76	276
OKIT_1257	orf01374_AWRIB616_contig1_group1_1213896_1212832_len=1065	fig|336988.4.peg.1261	ABC transporter permease component	antimicrobial peptide ABC transporter permease		1213896	1212832	1065	YP_810332.1	peptide ABC transporter permease	57.22	353	150	1	1:1059	1:352	2e-113	401
OKIT_1258	orf01375_AWRIB616_contig1_group1_1214075_1214533_len=459	fig|336988.4.peg.1262	hypothetical protein	GNAT family phage acetyltransferase		1214075	1214533	459	No_hit
OKIT_1259	orf01377_AWRIB616_contig1_group1_1214701_1214868_len=168	fig|336988.4.peg.1263	hypothetical protein			1214701	1214868	168	No_hit
OKIT_1260	orf01378_AWRIB616_contig1_group1_1215851_1216120_len=270	fig|336988.4.peg.1265	hypothetical protein	possible XRE family transcriptional regulator		1215851	1216120	270	No_hit
OKIT_1261	orf01379_AWRIB616_contig1_group1_1216173_1217573_len=1401	fig|336988.4.peg.1266	Chromosome segregation ATPase	phage protein		1216173	1217573	1401	No_hit
OKIT_1262	orf01380_AWRIB616_contig1_group1_1217578_1218216_len=639	fig|336988.4.peg.1267	Potassium voltage-gated channel subfamily KQT%3B possible potassium channel2C VIC family	potassium/ion channel protein		1217578	1218216	639	YP_810084.1	Kef-type K+ transporter NAD-binding component	67.92	212	68	0	1:636	1:212	2e-85	306
OKIT_1263	orf01381_AWRIB616_contig1_group1_1218223_1218438_len=216	fig|336988.4.peg.1268	hypothetical protein			1218223	1218438	216	No_hit
OKIT_1264	orf01382_AWRIB616_contig1_group1_1218513_1218806_len=294	fig|336988.4.peg.1269	Lj928 prophage protein			1218513	1218806	294	No_hit
OKIT_1265	orf01383_AWRIB616_contig1_group1_1218854_1220062_len=1209	fig|336988.4.peg.1270	Putative serine/threonine protein kinase			1218854	1220062	1209	No_hit
OKIT_1266	orf01384_AWRIB616_contig1_group1_1220188_1220964_len=777	fig|336988.4.peg.1271	hypothetical protein			1220188	1220964	777	No_hit
OKIT_1267	orf01385_AWRIB616_contig1_group1_1222219_1221302_len=918	fig|336988.4.peg.1272	Phosphonate ABC transporter phosphate-binding periplasmic component (TC 3.A.1.9.1)			1222219	1221302	918	No_hit
OKIT_1268	orf01387_AWRIB616_contig1_group1_1222420_1224120_len=1701	fig|336988.4.peg.1273	hypothetical protein			1222420	1224120	1701	YP_811047.1	hypothetical protein	36.58	421	231	15	478:1695	4:403	1e-60	226
OKIT_1269	orf01388_AWRIB616_contig1_group1_1224247_1228416_len=4170	fig|336988.4.peg.1274	CRISPR-associated protein2C SAG0894 family		CRISPR	1224247	1228416	4170	No_hit
OKIT_1270	orf01389_AWRIB616_contig1_group1_1228615_1229484_len=870	fig|336988.4.peg.1275	CRISPR-associated protein Cas1		CRISPR	1228615	1229484	870	No_hit
OKIT_1271	orf01390_AWRIB616_contig1_group1_1229595_1229801_len=207	fig|336988.4.peg.1276	hypothetical protein	CRISPR-associated Cas2 family protein	CRISPR	1229595	1229801	207	No_hit
OKIT_1272	orf01391_AWRIB616_contig1_group1_1229798_1230460_len=663	fig|336988.4.peg.1277	hypothetical protein	CRISPR-associated Csn2 family protein	CRISPR	1229798	1230460	663	No_hit
OKIT_1273	orf01392_AWRIB616_contig1_group1_1230472_1230669_len=198	fig|336988.4.peg.1278	hypothetical protein	Putative CRISPR_array	CRISPR	1230472	1230669	198	No_hit
OKIT_1274	orf01393_AWRIB616_contig1_group1_1230886_1231047_len=162	fig|336988.4.peg.1280	hypothetical protein	Putative CRISPR_array	CRISPR	1230886	1231047	162	No_hit
OKIT_1275	orf01394_AWRIB616_contig1_group1_1231216_1231392_len=177	fig|336988.4.peg.1281	hypothetical protein	Putative CRISPR_array	CRISPR	1231216	1231392	177	No_hit
OKIT_1276	orf01395_AWRIB616_contig1_group1_1231876_1232043_len=168	fig|336988.4.peg.1282	hypothetical protein	Putative CRISPR_array	CRISPR	1231876	1232043	168	No_hit
OKIT_1277	orf01396_AWRIB616_contig1_group1_1232368_1232526_len=159	fig|336988.4.peg.1283	hypothetical protein	Putative CRISPR_array	CRISPR	1232368	1232526	159	No_hit
OKIT_1278	orf01397_AWRIB616_contig1_group1_1232635_1232898_len=264	fig|336988.4.peg.1284	hypothetical protein	Putative CRISPR_array	CRISPR	1232635	1232898	264	No_hit
OKIT_1279	orf01399_AWRIB616_contig1_group1_1233130_1233555_len=426	fig|336988.4.peg.1286	hypothetical protein	Putative CRISPR_array	CRISPR	1233130	1233555	426	No_hit
OKIT_1280	orf01400_AWRIB616_contig1_group1_1233568_1233903_len=336	fig|336988.4.peg.1287	hypothetical protein	Putative CRISPR_array	CRISPR	1233568	1233903	336	No_hit
OKIT_1281	orf01401_AWRIB616_contig1_group1_1234461_1235132_len=672	fig|336988.4.peg.1288	hypothetical protein			1234461	1235132	672	No_hit
OKIT_1282	orf01402_AWRIB616_contig1_group1_1235248_1236399_len=1152	fig|336988.4.peg.1289	hypothetical protein			1235248	1236399	1152	No_hit
OKIT_1283	orf01404_AWRIB616_contig1_group1_1236441_1236599_len=159	#N/A	#N/A	hypothetical protein		1236441	1236599	159	No_hit
OKIT_1284	orf01405_AWRIB616_contig1_group1_1236656_1237621_len=966	fig|336988.4.peg.1291	Choloylglycine hydrolase (EC 3.5.1.24);Ontology_term=KEGG_ENZYME:3.5.1.24			1236656	1237621	966	YP_810611.1	penicillin V acylase precursor. cysteine	34.41	311	201	3	4:927	4:314	9e-50	189
OKIT_1285	orf01406_AWRIB616_contig1_group1_1237686_1238726_len=1041	fig|336988.4.peg.1292	Alcohol dehydrogenase (EC 1.1.1.1);Ontology_term=KEGG_ENZYME:1.1.1.1			1237686	1238726	1041	YP_810021.1	threonine dehydrogenase or related Zn-dependent	32.08	265	149	8	4:765	4:248	6e-23	100
OKIT_1286	orf01407_AWRIB616_contig1_group1_1239570_1238794_len=777	fig|336988.4.peg.1293	oxidoreductase2C short chain dehydrogenase/reductase family			1239570	1238794	777	YP_810294.1	acetoin reductase	32.41	253	156	3	28:741	3:255	3e-31	127
OKIT_1287	orf01408_AWRIB616_contig1_group1_1239712_1242051_len=2340	fig|336988.4.peg.1294	FIG00886071: hypothetical protein			1239712	1242051	2340	YP_811009.1	hypothetical protein	35.09	513	306	14	40:1560	18:509	6e-77	281
OKIT_1288	orf01410_AWRIB616_contig1_group1_1242208_1244109_len=1902	fig|336988.4.peg.1295	Possible periplasmic aspartyl protease			1242208	1244109	1902	No_hit
OKIT_1289	orf01412_AWRIB616_contig1_group1_1244352_1245038_len=687	fig|336988.4.peg.1296	Flavodoxin			1244352	1245038	687	No_hit
OKIT_1290	orf01413_AWRIB616_contig1_group1_1245069_1245872_len=804	fig|336988.4.peg.1297	Predicted peptidase2C alpha-beta hydrolase family			1245069	1245872	804	No_hit
OKIT_1291	orf01414_AWRIB616_contig1_group1_1246787_1245939_len=849	fig|336988.4.peg.1298	putative oxidoreductase			1246787	1245939	849	YP_810125.1	Aryl-alcohol dehydrogenase related enzyme	59.93	277	109	2	19:843	12:288	9e-93	332
OKIT_1292	orf01415_AWRIB616_contig1_group1_1246932_1248272_len=1341	fig|336988.4.peg.1299	similar to glutathione reductase			1246932	1248272	1341	YP_810750.1	glutathione reductase	67.49	446	145	0	1:1338	1:446	0.0	625
OKIT_1293	orf01416_AWRIB616_contig1_group1_1248959_1248330_len=630	fig|336988.4.peg.1300	Manganese superoxide dismutase (EC 1.15.1.1);Ontology_term=KEGG_ENZYME:1.15.1.1			1248959	1248330	630	No_hit
OKIT_1294	orf01417_AWRIB616_contig1_group1_1249417_1250541_len=1125	fig|336988.4.peg.1301	Methionine synthase II (cobalamin-independent)			1249417	1250541	1125	YP_811228.1_YP_810749.1		44.66	365	191	6	37:1119	19:376	4e-84	303
OKIT_1295	orf01418_AWRIB616_contig1_group1_1250545_1251657_len=1113	fig|336988.4.peg.1302	Cystathionine gamma-synthase (EC 2.5.1.48);Ontology_term=KEGG_ENZYME:2.5.1.48			1250545	1251657	1113	YP_811264.1	cystathionine gamma-lyase	42.35	366	192	3	43:1092	13:375	5e-78	283
OKIT_1296	orf01419_AWRIB616_contig1_group1_1251654_1252538_len=885	fig|336988.4.peg.1303	Homoserine O-succinyltransferase (EC 2.3.1.46);Ontology_term=KEGG_ENZYME:2.3.1.46			1251654	1252538	885	YP_810359.1	homoserine O-succinyltransferase	30.74	257	164	6	88:840	16:264	1e-31	129
OKIT_1297	orf01420_AWRIB616_contig1_group1_1252535_1253686_len=1152	fig|336988.4.peg.1304	Cystathionine beta-lyase (EC 4.4.1.8);Ontology_term=KEGG_ENZYME:4.4.1.8			1252535	1253686	1152	YP_810358.1	cystathionine beta-lyase	66.49	376	124	1	13:1140	4:377	8e-141	492
OKIT_1298	orf01421_AWRIB616_contig1_group1_1254161_1253733_len=429	fig|336988.4.peg.1305	Universal stress protein family			1254161	1253733	429	YP_810730.1	UspA family nucleotide-binding protein	68.31	142	45	0	1:426	1:142	8e-55	204
OKIT_1299	orf01422_AWRIB616_contig1_group1_1255614_1254163_len=1452	fig|336988.4.peg.1306	Amino acid permease			1255614	1254163	1452	YP_810729.1	amino acid transporter	89.96	468	47	0	1:1404	1:468	0.0	867
OKIT_1300	orf01423_AWRIB616_contig1_group1_1255947_1258595_len=2649	fig|336988.4.peg.1307	Alanyl-tRNA synthetase (EC 6.1.1.7);Ontology_term=KEGG_ENZYME:6.1.1.7			1255947	1258595	2649	YP_810728.1	alanyl-tRNA synthetase	76.76	882	205	0	1:2646	1:882	0.0	1386
OKIT_1301	orf01424_AWRIB616_contig1_group1_1258614_1258895_len=282	fig|336988.4.peg.1308	Hypothetical protein possible functionally linked with Alanyl-tRNA synthetase			1258614	1258895	282	YP_810727.1	hypothetical protein	88.17	93	8	1	1:279	1:90	2e-42	162
OKIT_1302	orf01425_AWRIB616_contig1_group1_1258892_1259326_len=435	fig|336988.4.peg.1309	Putative Holliday junction resolvase (EC 3.1.-.-);Ontology_term=KEGG_ENZYME:3.1.-.-			1258892	1259326	435	YP_810726.1	RNase H-like ribonuclease	84.72	144	22	0	1:432	1:144	3e-68	249
OKIT_1303	orf01426_AWRIB616_contig1_group1_1259319_1259645_len=327	fig|336988.4.peg.1310	Ortholog of S. aureus MRSA252 (BX571856) SAR1694			1259319	1259645	327	YP_810725.1	hypothetical protein	82.52	103	18	0	10:318	7:109	6e-50	187
OKIT_1304	orf01428_AWRIB616_contig1_group1_1260224_1259742_len=483	fig|336988.4.peg.1311	FIG00885929: hypothetical protein			1260224	1259742	483	YP_810724.1	hypothetical protein	45.83	144	77	1	49:480	3:145	2e-35	140
OKIT_1305	orf01429_AWRIB616_contig1_group1_1260279_1261004_len=726	fig|336988.4.peg.1312	Negative regulator of genetic competence2C sporulation and motility			1260279	1261004	726	YP_810723.1	negative regulator of genetic competence,	69.71	241	71	1	1:723	1:239	3e-95	340
OKIT_1306	orf01430_AWRIB616_contig1_group1_1261036_1262124_len=1089	fig|336988.4.peg.1313	Competence protein CoiA			1261036	1262124	1089	YP_810722.1	competence protein	41.69	367	204	2	1:1086	1:362	2e-80	291
OKIT_1307	orf01431_AWRIB616_contig1_group1_1262150_1263961_len=1812	fig|336988.4.peg.1314	Oligoendopeptidase F			1262150	1263961	1812	YP_810721.1	oligopeptidase F	81.56	602	111	0	1:1806	1:602	0.0	1005
OKIT_1308	orf01433_AWRIB616_contig1_group1_1264001_1264876_len=876	fig|336988.4.peg.1315	NAD kinase (EC 2.7.1.23);Ontology_term=KEGG_ENZYME:2.7.1.23			1264001	1264876	876	YP_810720.1	inorganic polyphosphate/ATP-NAD kinase	75.57	262	64	0	79:864	1:262	2e-116	410
OKIT_1309	orf01434_AWRIB616_contig1_group1_1264873_1265772_len=900	fig|336988.4.peg.1316	Similar to ribosomal large subunit pseudouridine synthase D2C Bacillus subtilis YjbO type			1264873	1265772	900	YP_810719.1	pseudouridylate synthase, 23S RNA-specific	77.59	299	67	0	1:897	1:299	2e-141	494
OKIT_1310	orf01435_AWRIB616_contig1_group1_1266794_1265778_len=1017	fig|336988.4.peg.1317	6-phosphogluconolactonase (EC 3.1.1.31);Ontology_term=KEGG_ENZYME:3.1.1.31			1266794	1265778	1017	YP_810718.1	3-carboxymuconate cyclase	78.93	337	71	0	1:1011	1:337	7e-162	561
OKIT_1311	orf01436_AWRIB616_contig1_group1_1266850_1267998_len=1149	fig|336988.4.peg.1318	membrane protein2C putative			1266850	1267998	1149	YP_810717.1	permease	75.85	381	92	0	1:1143	1:381	5e-174	602
OKIT_1312	orf01437_AWRIB616_contig1_group1_1267995_1268501_len=507	fig|336988.4.peg.1319	tRNA (cytosine34-2-O-)-methyltransferase (EC 2.1.1.-);Ontology_term=KEGG_ENZYME:2.1.1.-			1267995	1268501	507	YP_810716.1	rRNA methylase (SpoU class)	84.52	168	26	0	1:504	1:168	6e-82	295
OKIT_1313	orf01438_AWRIB616_contig1_group1_1268555_1270930_len=2376	fig|336988.4.peg.1320	Cell division protein FtsK			1268555	1270930	2376	YP_810715.1	DNA segregation ATPase FtsK	73.78	797	190	4	1:2364	1:787	0.0	1144
OKIT_1314	orf01439_AWRIB616_contig1_group1_1270985_1271338_len=354	fig|336988.4.peg.1321	hypothetical protein			1270985	1271338	354	YP_810714.1	hypothetical protein	59.80	102	41	0	43:348	2:103	2e-36	143
OKIT_1315	orf01440_AWRIB616_contig1_group1_1271461_1271892_len=432	fig|336988.4.peg.1322	Cell division protein MraZ			1271461	1271892	432	YP_810713.1	hypothetical protein	90.91	143	13	0	1:429	1:143	5e-76	275
OKIT_1316	orf01441_AWRIB616_contig1_group1_1271889_1272836_len=948	fig|336988.4.peg.1323	rRNA small subunit methyltransferase H			1271889	1272836	948	YP_810712.1	SAM-dependent methyltransferase for cell	73.48	313	83	0	7:945	2:314	1e-132	464
OKIT_1317	orf01442_AWRIB616_contig1_group1_1272836_1273210_len=375	fig|336988.4.peg.1324	Protein required for the initiation of cell division			1272836	1273210	375	YP_810711.1	cell division protein FtsL	55.65	124	55	0	1:372	1:124	6e-37	144
OKIT_1318	orf01443_AWRIB616_contig1_group1_1273210_1275357_len=2148	fig|336988.4.peg.1325	Cell division protein FtsI [Peptidoglycan synthetase] (EC 2.4.1.129);Ontology_term=KEGG_ENZYME:2.4.1.129			1273210	1275357	2148	YP_810710.1	cell division protein FtsI/penicillin-binding	67.04	713	231	1	7:2145	4:712	0.0	973
OKIT_1319	orf01444_AWRIB616_contig1_group1_1275354_1276331_len=978	fig|336988.4.peg.1326	Phospho-N-acetylmuramoyl-pentapeptide-transferase (EC 2.7.8.13);Ontology_term=KEGG_ENZYME:2.7.8.13			1275354	1276331	978	YP_810709.1	phospho-N-acetylmuramoyl-pentapeptide-	64.31	325	116	0	1:975	1:325	2e-128	451
OKIT_1320	orf01446_AWRIB616_contig1_group1_1276319_1277635_len=1317	fig|336988.4.peg.1327	UDP-N-acetylmuramoylalanine--D-glutamate ligase (EC 6.3.2.9);Ontology_term=KEGG_ENZYME:6.3.2.9			1276319	1277635	1317	YP_810708.1	UDP-N-acetylmuramoylalanine--D-glutamate ligase	75.80	438	106	0	1:1314	1:438	0.0	661
OKIT_1321	orf01447_AWRIB616_contig1_group1_1277632_1278750_len=1119	fig|336988.4.peg.1328	UDP-N-acetylglucosamine--N-acetylmuramyl-(pentapeptide) pyrophosphoryl-undecaprenol N-acetylglucosamine transferase (EC 2.4.1.227);Ontology_term=KEGG_ENZYME:2.4.1.227			1277632	1278750	1119	YP_810707.1	UDP-N-acetylglucosamine--N-acetylmuramyl-	79.13	369	77	0	7:1113	1:369	7e-168	582
OKIT_1322	orf01448_AWRIB616_contig1_group1_1278731_1279561_len=831	fig|336988.4.peg.1329	Cell division protein FtsQ			1278731	1279561	831	YP_810706.1	cell division protein FtsQ	59.45	254	103	0	67:828	7:260	2e-88	317
OKIT_1323	orf01449_AWRIB616_contig1_group1_1279666_1280997_len=1332	fig|336988.4.peg.1330	Cell division protein FtsA			1279666	1280997	1332	YP_810705.1	cell division protein FtsA	81.09	439	83	0	13:1329	1:439	0.0	701
OKIT_1324	orf01451_AWRIB616_contig1_group1_1281007_1282392_len=1386	fig|336988.4.peg.1331	Cell division protein FtsZ (EC 3.4.24.-);Ontology_term=KEGG_ENZYME:3.4.24.-			1281007	1282392	1386	YP_810704.1	cell division protein FtsZ	86.55	476	46	5	1:1383	1:473	0.0	771
OKIT_1325	orf01452_AWRIB616_contig1_group1_1282411_1282941_len=531	fig|336988.4.peg.1332	FIG001960: FtsZ-interacting protein related to cell division			1282411	1282941	531	YP_810703.1	cell division protein	78.45	181	33	3	1:528	1:180	3e-74	269
OKIT_1326	orf01453_AWRIB616_contig1_group1_1282928_1283209_len=282	fig|336988.4.peg.1333	Cell division membrane protein			1282928	1283209	282	No_hit
OKIT_1327	orf01454_AWRIB616_contig1_group1_1283209_1283982_len=774	fig|336988.4.peg.1334	FIG001583: hypothetical protein2C contains S4-like RNA binding domain			1283209	1283982	774	YP_810701.1	cell division protein	69.14	256	78	1	1:768	1:255	5e-101	359
OKIT_1328	orf01455_AWRIB616_contig1_group1_1284228_1286993_len=2766	fig|336988.4.peg.1335	Isoleucyl-tRNA synthetase (EC 6.1.1.5);Ontology_term=KEGG_ENZYME:6.1.1.5			1284228	1286993	2766	YP_810700.1	isoleucyl-tRNA synthetase	85.02	921	138	0	1:2763	1:921	0.0	1647
OKIT_1329	orf01456_AWRIB616_contig1_group1_1287229_1287723_len=495	fig|336988.4.peg.1336	Phosphoribosylaminoimidazole carboxylase catalytic subunit (EC 4.1.1.21);Ontology_term=KEGG_ENZYME:4.1.1.21			1287229	1287723	495	YP_810699.1	phosphoribosylcarboxyaminoimidazole (NCAIR)	73.78	164	43	0	1:492	1:164	2e-67	246
OKIT_1330	orf01457_AWRIB616_contig1_group1_1287716_1288840_len=1125	fig|336988.4.peg.1337	Phosphoribosylaminoimidazole carboxylase ATPase subunit (EC 4.1.1.21);Ontology_term=KEGG_ENZYME:4.1.1.21			1287716	1288840	1125	YP_810698.1	phosphoribosylaminoimidazole carboxylase ATPase	72.09	369	103	0	10:1116	2:370	3e-161	560
OKIT_1331	orf01458_AWRIB616_contig1_group1_1288837_1289562_len=726	fig|336988.4.peg.1338	Phosphoribosylaminoimidazole-succinocarboxamide synthase (EC 6.3.2.6);Ontology_term=KEGG_ENZYME:6.3.2.6			1288837	1289562	726	YP_810697.1	phosphoribosylaminoimidazole-succinocarboxamide	75.10	241	60	0	1:723	1:241	1e-103	367
OKIT_1332	orf01459_AWRIB616_contig1_group1_1289565_1289828_len=264	fig|336988.4.peg.1339	Phosphoribosylformylglycinamidine synthase2C PurS subunit (EC 6.3.5.3);Ontology_term=KEGG_ENZYME:6.3.5.3			1289565	1289828	264	YP_810696.1	phosphoribosylformylglycinamidine (FGAM)	73.49	83	22	0	1:249	1:83	7e-32	127
OKIT_1333	orf01461_AWRIB616_contig1_group1_1289830_1290504_len=675	fig|336988.4.peg.1340	Phosphoribosylformylglycinamidine synthase2C glutamine amidotransferase subunit (EC 6.3.5.3);Ontology_term=KEGG_ENZYME:6.3.5.3			1289830	1290504	675	YP_810695.1	phosphoribosylformylglycinamidine synthase	71.36	220	63	0	1:660	1:220	8e-92	328
OKIT_1334	orf01462_AWRIB616_contig1_group1_1290494_1292716_len=2223	fig|336988.4.peg.1341	Phosphoribosylformylglycinamidine synthase2C synthetase subunit (EC 6.3.5.3);Ontology_term=KEGG_ENZYME:6.3.5.3			1290494	1292716	2223	YP_810694.1	phosphoribosylformylglycinamidine synthase	72.30	740	204	1	1:2217	1:740	0.0	1090
OKIT_1335	orf01463_AWRIB616_contig1_group1_1292727_1294259_len=1533	fig|336988.4.peg.1342	Amidophosphoribosyltransferase (EC 2.4.2.14);Ontology_term=KEGG_ENZYME:2.4.2.14			1292727	1294259	1533	No_hit
OKIT_1336	orf01464_AWRIB616_contig1_group1_1294252_1295304_len=1053	fig|336988.4.peg.1343	Phosphoribosylformylglycinamidine cyclo-ligase (EC 6.3.3.1);Ontology_term=KEGG_ENZYME:6.3.3.1			1294252	1295304	1053	YP_810693.1	phosphoribosylformylglycinamidine cyclo-ligase	62.39	327	123	0	67:1047	1:327	1e-117	415
OKIT_1337	orf01466_AWRIB616_contig1_group1_1295301_1295891_len=591	fig|336988.4.peg.1344	Phosphoribosylglycinamide formyltransferase (EC 2.1.2.2);Ontology_term=KEGG_ENZYME:2.1.2.2			1295301	1295891	591	YP_810692.1	phosphoribosylglycinamide formyltransferase	66.67	192	64	0	10:585	3:194	4e-71	259
OKIT_1338	orf01467_AWRIB616_contig1_group1_1295888_1297417_len=1530	fig|336988.4.peg.1345	IMP cyclohydrolase (EC 3.5.4.10) / Phosphoribosylaminoimidazolecarboxamide formyltransferase (EC 2.1.2.3);Ontology_term=KEGG_ENZYME:3.5.4.10,KEGG_ENZYME:2.1.2.3			1295888	1297417	1530	YP_810691.1	bifunctional	76.23	509	121	0	1:1527	1:509	0.0	768
OKIT_1339	orf01468_AWRIB616_contig1_group1_1297441_1298721_len=1281	fig|336988.4.peg.1346	Phosphoribosylamine--glycine ligase (EC 6.3.4.13);Ontology_term=KEGG_ENZYME:6.3.4.13			1297441	1298721	1281	No_hit
OKIT_1340	orf01470_AWRIB616_contig1_group1_1298934_1300082_len=1149	fig|336988.4.peg.1347	Inosine-5-monophosphate dehydrogenase (EC 1.1.1.205);Ontology_term=KEGG_ENZYME:1.1.1.205			1298934	1300082	1149	YP_810690.1	inosine-5-monophosphate dehydrogenase	84.82	382	58	0	1:1146	1:382	0.0	645
OKIT_1341	orf01472_AWRIB616_contig1_group1_1300169_1301479_len=1311	fig|336988.4.peg.1348	Adenylosuccinate synthetase (EC 6.3.4.4);Ontology_term=KEGG_ENZYME:6.3.4.4			1300169	1301479	1311	YP_810689.1	adenylosuccinate synthetase	77.24	435	99	0	1:1305	1:435	0.0	708
OKIT_1342	orf01473_AWRIB616_contig1_group1_1301476_1302777_len=1302	fig|336988.4.peg.1349	Adenylosuccinate lyase (EC 4.3.2.2);Ontology_term=KEGG_ENZYME:4.3.2.2			1301476	1302777	1302	YP_810688.1	adenylosuccinate lyase	84.76	433	66	0	1:1299	1:433	0.0	736
OKIT_1343	orf01474_AWRIB616_contig1_group1_1302774_1303337_len=564	fig|336988.4.peg.1350	Hypoxanthine-guanine phosphoribosyltransferase (EC 2.4.2.8);Ontology_term=KEGG_ENZYME:2.4.2.8			1302774	1303337	564	YP_810687.1	hypoxanthine phosphoribosyltransferase	84.49	187	29	0	1:561	1:187	2e-89	320
OKIT_1344	orf01475_AWRIB616_contig1_group1_1303337_1304890_len=1554	fig|336988.4.peg.1351	GMP synthase [glutamine-hydrolyzing] (EC 6.3.5.2);Ontology_term=KEGG_ENZYME:6.3.5.2			1303337	1304890	1554	YP_810686.1	bifunctional GMP synthase/glutamine	90.33	517	50	0	1:1551	1:517	0.0	948
OKIT_1345	orf01476_AWRIB616_contig1_group1_1305121_1306512_len=1392	fig|336988.4.peg.1353	FIG006126: DNA helicase2C restriction/modification system component YeeB			1305121	1306512	1392	No_hit
OKIT_1346	orf01477_AWRIB616_contig1_group1_1306505_1307713_len=1209	fig|336988.4.peg.1354	YeeC-like protein			1306505	1307713	1209	No_hit
OKIT_1347	orf01478_AWRIB616_contig1_group1_1307729_1309069_len=1341	fig|336988.4.peg.1355	hypothetical protein			1307729	1309069	1341	No_hit
OKIT_1348	orf01479_AWRIB616_contig1_group1_1309110_1310903_len=1794	fig|336988.4.peg.1356	Endonuclease			1309110	1310903	1794	No_hit
OKIT_1349	orf01480_AWRIB616_contig1_group1_1310900_1312255_len=1356	fig|336988.4.peg.1357	hypothetical protein			1310900	1312255	1356	No_hit
OKIT_1350	orf01481_AWRIB616_contig1_group1_1312621_1312235_len=387	fig|336988.4.peg.1358	hypothetical protein			1312621	1312235	387	No_hit
OKIT_1351	orf01482_AWRIB616_contig1_group1_1312862_1313107_len=246	fig|336988.4.peg.1360	hypothetical protein			1312862	1313107	246	No_hit
OKIT_1352	orf01483_AWRIB616_contig1_group1_1313238_1313777_len=540	fig|336988.4.peg.1361	Dihydrofolate reductase (EC 1.5.1.3);Ontology_term=KEGG_ENZYME:1.5.1.3			1313238	1313777	540	No_hit
OKIT_1353	orf01484_AWRIB616_contig1_group1_1313868_1314644_len=777	fig|336988.4.peg.1362	Predicted Zn-dependent protease			1313868	1314644	777	No_hit
OKIT_1354	orf01485_AWRIB616_contig1_group1_1314761_1315669_len=909	fig|336988.4.peg.1363	Fructokinase (EC 2.7.1.4);Ontology_term=KEGG_ENZYME:2.7.1.4			1314761	1315669	909	YP_811219.1	branched chain amino acid:	57.93	290	118	3	19:879	2:290	4e-95	340
OKIT_1355	orf01486_AWRIB616_contig1_group1_1315730_1316383_len=654	fig|336988.4.peg.1364	Phosphoglycerate mutase family protein			1315730	1316383	654	YP_810684.1	phosphoglycerate mutase family protein	62.92	178	66	0	118:651	1:178	2e-65	240
OKIT_1356	orf01487_AWRIB616_contig1_group1_1316393_1317814_len=1422	fig|336988.4.peg.1365	Xanthine/uracil/thiamine/ascorbate permease family protein			1316393	1317814	1422	YP_810682.1	arginine deiminase	84.96	472	71	0	1:1416	1:472	0.0	803
OKIT_1357	orf01488_AWRIB616_contig1_group1_1317852_1318163_len=312	fig|336988.4.peg.1366	Small membrane protein			1317852	1318163	312	YP_810673.1	small membrane protein	68.93	103	32	0	1:309	1:103	3e-40	155
OKIT_1358	orf01489_AWRIB616_contig1_group1_1318178_1318852_len=675	fig|336988.4.peg.1367	5-methylthioadenosine nucleosidase (EC 3.2.2.16) / S-adenosylhomocysteine nucleosidase (EC 3.2.2.9);Ontology_term=KEGG_ENZYME:3.2.2.16,KEGG_ENZYME:3.2.2.9			1318178	1318852	675	YP_810672.1	methylthioadenosine nucleosidase	74.55	224	57	0	1:672	1:224	7e-96	342
OKIT_1359	orf01490_AWRIB616_contig1_group1_1318888_1319226_len=339	fig|336988.4.peg.1368	hypothetical protein			1318888	1319226	339	YP_810671.1	hypothetical protein	65.18	112	39	0	1:336	1:112	1e-39	153
OKIT_1360	orf01491_AWRIB616_contig1_group1_1319265_1321613_len=2349	fig|336988.4.peg.1369	RecD-like DNA helicase YrrC			1319265	1321613	2349	YP_810670.1	ATP-dependent RecD/TraA family DNA helicase	67.18	774	239	5	34:2340	3:766	0.0	1004
OKIT_1361	orf01492_AWRIB616_contig1_group1_1321606_1322571_len=966	fig|336988.4.peg.1370	FIG00885427: hypothetical protein			1321606	1322571	966	YP_810669.1	lysophospholipase L1 or related esterase	59.01	322	130	2	1:963	1:321	2e-106	377
OKIT_1362	orf01493_AWRIB616_contig1_group1_1322564_1323934_len=1371	fig|336988.4.peg.1371	tRNA and rRNA cytosine-C5-methylases			1322564	1323934	1371	YP_810668.1	tRNA and rRNA cytosine-C5-methylase	62.72	456	168	1	1:1368	1:454	7e-173	598
OKIT_1363	orf01494_AWRIB616_contig1_group1_1325034_1323940_len=1095	fig|336988.4.peg.1372	Isopentenyl-diphosphate delta-isomerase2C FMN-dependent (EC 5.3.3.2);Ontology_term=KEGG_ENZYME:5.3.3.2			1325034	1323940	1095	YP_810667.1	isopentenyl pyrophosphate isomerase	69.70	363	109	1	1:1089	1:362	8e-148	515
OKIT_1364	orf01495_AWRIB616_contig1_group1_1325783_1325031_len=753	fig|336988.4.peg.1373	Phosphomevalonate kinase (EC 2.7.4.2);Ontology_term=KEGG_ENZYME:2.7.4.2			1325783	1325031	753	YP_810666.1	phosphomevalonate kinase	63.60	250	90	1	1:750	1:249	3e-88	317
OKIT_1365	orf01496_AWRIB616_contig1_group1_1326720_1325776_len=945	fig|336988.4.peg.1374	Diphosphomevalonate decarboxylase (EC 4.1.1.33);Ontology_term=KEGG_ENZYME:4.1.1.33			1326720	1325776	945	YP_810665.1	diphosphomevalonate decarboxylase	60.19	314	125	0	1:942	1:314	5e-109	386
OKIT_1366	orf01497_AWRIB616_contig1_group1_1327640_1326720_len=921	fig|336988.4.peg.1375	Mevalonate kinase (EC 2.7.1.36);Ontology_term=KEGG_ENZYME:2.7.1.36			1327640	1326720	921	YP_810664.1	mevalonate kinase	79.74	306	62	0	1:918	1:306	2e-141	493
OKIT_1367	orf01498_AWRIB616_contig1_group1_1327677_1329137_len=1461	fig|336988.4.peg.1376	DinG family ATP-dependent helicase YoaA			1327677	1329137	1461	YP_810663.1	Rad3-related DNA helicase	63.64	484	176	0	1:1452	1:484	1e-177	615
OKIT_1368	orf01500_AWRIB616_contig1_group1_1329178_1329690_len=513	fig|336988.4.peg.1377	FIG00886061: hypothetical protein			1329178	1329690	513	YP_810661.1	asparaginyl-tRNA synthetase	64.71	170	60	0	1:510	1:170	4e-62	229
OKIT_1369	orf01501_AWRIB616_contig1_group1_1329709_1331016_len=1308	fig|336988.4.peg.1378	Asparaginyl-tRNA synthetase (EC 6.1.1.22);Ontology_term=KEGG_ENZYME:6.1.1.22			1329709	1331016	1308	No_hit
OKIT_1370	orf01502_AWRIB616_contig1_group1_1331018_1331719_len=702	fig|336988.4.peg.1379	Chromosome replication initiation protein dnaD			1331018	1331719	702	YP_810660.1	DNA replication protein DnaD	62.76	239	82	2	1:699	1:238	3e-82	296
OKIT_1371	orf01503_AWRIB616_contig1_group1_1334260_1331765_len=2496	fig|336988.4.peg.1380	Multimodular transpeptidase-transglycosylase (EC 2.4.1.129) (EC 3.4.-.-) / Penicillin-binding protein 1A/1B (PBP1);Ontology_term=KEGG_ENZYME:2.4.1.129,KEGG_ENZYME:3.4.-.-			1334260	1331765	2496	YP_810659.1	membrane carboxypeptidase (penicillin-binding	67.33	860	244	6	1:2481	1:856	0.0	1149
OKIT_1372	orf01505_AWRIB616_contig1_group1_1334855_1334253_len=603	fig|336988.4.peg.1381	Recombination protein RecU			1334855	1334253	603	YP_810658.1	Holliday junction-specific endonuclease	79.79	193	39	0	1:579	1:193	4e-92	329
OKIT_1373	orf01506_AWRIB616_contig1_group1_1334878_1335444_len=567	fig|336988.4.peg.1382	FIG005686: hypothetical protein			1334878	1335444	567	YP_810657.1	hypothetical protein	68.62	188	59	0	1:564	1:188	7e-80	288
OKIT_1374	orf01507_AWRIB616_contig1_group1_1336037_1335456_len=582	fig|336988.4.peg.1383	FIG00742299: hypothetical protein			1336037	1335456	582	No_hit
OKIT_1375	orf01508_AWRIB616_contig1_group1_1337823_1336027_len=1797	fig|336988.4.peg.1384	Oligoendopeptidase F			1337823	1336027	1797	YP_810656.1	oligopeptidase F	82.94	598	102	0	1:1794	1:598	0.0	1031
OKIT_1376	orf01509_AWRIB616_contig1_group1_1340075_1338372_len=1704	fig|336988.4.peg.1385	NADH dehydrogenase (EC 1.6.99.3) in cluster with putative pheromone precursor;Ontology_term=KEGG_ENZYME:1.6.99.3			1340075	1338372	1704	No_hit
OKIT_1377	orf01510_AWRIB616_contig1_group1_1340218_1341348_len=1131	fig|336988.4.peg.1386	FIG001721: Predicted N6-adenine-specific DNA methylase			1340218	1341348	1131	YP_810648.1	N6-adenine-specific DNA methylase	87.23	376	48	0	1:1128	1:376	0.0	690
OKIT_1378	orf01512_AWRIB616_contig1_group1_1341363_1341788_len=426	fig|336988.4.peg.1387	hypothetical protein			1341363	1341788	426	YP_810647.1	hypothetical protein	56.82	132	57	0	10:405	1:132	1e-42	164
OKIT_1379	orf01513_AWRIB616_contig1_group1_1341805_1342668_len=864	fig|336988.4.peg.1388	Ribosomal large subunit pseudouridine synthase D (EC 4.2.1.70);Ontology_term=KEGG_ENZYME:4.2.1.70			1341805	1342668	864	YP_810646.1	ribosomal large subunit pseudouridine synthase	73.08	286	77	0	1:858	18:303	2e-120	424
OKIT_1380	orf01514_AWRIB616_contig1_group1_1344350_1342710_len=1641	fig|336988.4.peg.1389	Fibronectin/fibrinogen-binding protein			1344350	1342710	1641	YP_810644.1	fibronectin-binding protein	76.37	546	128	1	1:1635	1:546	0.0	848
OKIT_1381	orf01515_AWRIB616_contig1_group1_1344459_1344863_len=405	fig|336988.4.peg.1390	transcriptional regulator2C MarR family			1344459	1344863	405	YP_810643.1	transcriptional regulator	83.46	133	22	0	1:399	1:133	1e-57	213
OKIT_1382	orf01516_AWRIB616_contig1_group1_1345026_1344865_len=162	fig|336988.4.peg.1391	hypothetical protein			1345026	1344865	162	No_hit
OKIT_1383	orf01517_AWRIB616_contig1_group1_1345727_1345041_len=687	fig|336988.4.peg.1392	membrane protein			1345727	1345041	687	YP_810641.1	hypothetical protein	69.64	224	68	0	13:684	1:224	2e-90	323
OKIT_1384	orf01518_AWRIB616_contig1_group1_1345766_1347595_len=1830	fig|336988.4.peg.1393	Excinuclease ABC subunit C			1345766	1347595	1830	YP_810640.1	excinuclease ABC subunit C	88.01	609	71	1	1:1827	1:607	0.0	1085
OKIT_1385	orf01519_AWRIB616_contig1_group1_1347614_1348930_len=1317	fig|336988.4.peg.1394	COG0536: GTP-binding protein Obg			1347614	1348930	1317	YP_810639.1	GTPase	81.78	439	76	2	1:1314	1:436	0.0	733
OKIT_1386	orf01520_AWRIB616_contig1_group1_1348938_1349918_len=981	fig|336988.4.peg.1395	Ribonuclease Z (EC 3.1.26.11);Ontology_term=KEGG_ENZYME:3.1.26.11			1348938	1349918	981	YP_810638.1	beta-lactamase superfamily hydrolase	73.25	314	84	0	1:942	1:314	2e-138	484
OKIT_1387	orf01521_AWRIB616_contig1_group1_1349911_1351779_len=1869	fig|336988.4.peg.1396	Single-stranded-DNA-specific exonuclease RecJ (EC 3.1.-.-);Ontology_term=KEGG_ENZYME:3.1.-.-			1349911	1351779	1869	YP_810637.1	single-stranded DNA-specific exonuclease	61.41	622	240	0	1:1866	1:622	0.0	798
OKIT_1388	orf01523_AWRIB616_contig1_group1_1351769_1352296_len=528	fig|336988.4.peg.1397	Adenine phosphoribosyltransferase (EC 2.4.2.7);Ontology_term=KEGG_ENZYME:2.4.2.7			1351769	1352296	528	YP_810636.1	adenine phosphoribosyltransferase	84.00	175	28	0	1:525	1:175	3e-86	309
OKIT_1389	orf01524_AWRIB616_contig1_group1_1352343_1353428_len=1086	fig|336988.4.peg.1398	Muconate cycloisomerase (EC 5.5.1.1);Ontology_term=KEGG_ENZYME:5.5.1.1			1352343	1353428	1086	YP_810635.1	L-alanine-DL-glutamate epimerase/enolase	67.13	362	118	1	1:1083	1:362	3e-138	483
OKIT_1390	orf01525_AWRIB616_contig1_group1_1353425_1354180_len=756	fig|336988.4.peg.1399	Beta-lactamase class A			1353425	1354180	756	YP_810634.1	Beta-lactamase class A	53.20	250	117	0	1:750	3:252	1e-71	261
OKIT_1391	orf01526_AWRIB616_contig1_group1_1354231_1354890_len=660	fig|336988.4.peg.1400	D-alanyl-D-alanine carboxypeptidase (EC 3.4.16.4);Ontology_term=KEGG_ENZYME:3.4.16.4			1354231	1354890	660	YP_810632.1	M15B family D-Ala-D-Ala carboxypeptidase VanY	61.19	219	85	0	1:657	1:219	4e-76	276
OKIT_1392	orf01527_AWRIB616_contig1_group1_1354887_1355807_len=921	fig|336988.4.peg.1401	Proline iminopeptidase (EC 3.4.11.5);Ontology_term=KEGG_ENZYME:3.4.11.5			1354887	1355807	921	YP_810631.1	tricorn interacting factor F1	69.28	306	94	0	1:918	1:306	3e-131	460
OKIT_1393	orf01528_AWRIB616_contig1_group1_1355800_1357218_len=1419	fig|336988.4.peg.1402	Xaa-His dipeptidase (EC 3.4.13.3);Ontology_term=KEGG_ENZYME:3.4.13.3			1355800	1357218	1419	YP_810630.1	dipeptidase	66.95	472	154	1	1:1416	1:470	0.0	646
OKIT_1394	orf01529_AWRIB616_contig1_group1_1357363_1358535_len=1173	fig|336988.4.peg.1403	NADH dehydrogenase (EC 1.6.99.3);Ontology_term=KEGG_ENZYME:1.6.99.3			1357363	1358535	1173	YP_811338.1	NADH dehydrogenase, FAD-containing subunit	68.97	390	121	0	1:1170	1:390	1e-162	564
OKIT_1395	orf01531_AWRIB616_contig1_group1_1358557_1360002_len=1446	fig|336988.4.peg.1404	Cytochrome d ubiquinol oxidase subunit I (EC 1.10.3.-);Ontology_term=KEGG_ENZYME:1.10.3.-			1358557	1360002	1446	YP_811337.1	cytochrome bd-type quinol oxidase, subunit 1	76.38	470	109	1	1:1404	1:470	0.0	767
OKIT_1396	orf01532_AWRIB616_contig1_group1_1359999_1361018_len=1020	fig|336988.4.peg.1405	Cytochrome d ubiquinol oxidase subunit II (EC 1.10.3.-);Ontology_term=KEGG_ENZYME:1.10.3.-			1359999	1361018	1020	YP_811336.1	cytochrome bd-type quinol oxidase, subunit 2	72.81	331	90	0	1:993	1:331	2e-148	517
OKIT_1397	orf01533_AWRIB616_contig1_group1_1361030_1362778_len=1749	fig|336988.4.peg.1406	Transport ATP-binding protein CydD			1361030	1362778	1749	YP_810038.1	cytochrome bd biosynthesis ABC-type transporter,	41.59	577	330	4	1:1719	22:595	3e-134	471
OKIT_1398	orf01534_AWRIB616_contig1_group1_1362759_1364516_len=1758	fig|336988.4.peg.1407	Transport ATP-binding protein CydC			1362759	1364516	1758	YP_810039.1	cytochrome bd biosynthesis ABC-type transporter,	37.76	572	346	4	37:1743	4:568	5e-118	417
OKIT_1399	orf01535_AWRIB616_contig1_group1_1365500_1364496_len=1005	fig|336988.4.peg.1408	Heptaprenyl diphosphate synthase component II (EC 2.5.1.30);Ontology_term=KEGG_ENZYME:2.5.1.30			1365500	1364496	1005	YP_811335.1	geranylgeranyl pyrophosphate synthase	50.45	335	165	1	1:1002	1:335	1e-93	335
OKIT_1400	orf01536_AWRIB616_contig1_group1_1365614_1366528_len=915	fig|336988.4.peg.1409	Putative prenyltransferase2C contains 12C4-dihydroxy-2-naphthoate octaprenyltransferase domain			1365614	1366528	915	YP_811334.1	1,4-dihydroxy-2-naphthoate	62.05	303	115	0	1:909	1:303	2e-110	390
OKIT_1401	orf01537_AWRIB616_contig1_group1_1367372_1366560_len=813	fig|336988.4.peg.1410	Putative stomatin/prohibitin-family membrane protease subunit YbbK			1367372	1366560	813	YP_810627.1	membrane protease family	89.96	269	27	0	1:807	1:269	2e-137	480
OKIT_1402	orf01538_AWRIB616_contig1_group1_1367723_1367382_len=342	fig|336988.4.peg.1411	Uncharacterized protein encoded in hypervariable junctions of pilus gene clusters			1367723	1367382	342	YP_810626.1	hypothetical protein	87.27	110	14	0	10:339	16:125	1e-52	196
OKIT_1403	orf01539_AWRIB616_contig1_group1_1367929_1370466_len=2538	fig|336988.4.peg.1412	Lysyl aminopeptidase (EC 3.4.11.15);Ontology_term=KEGG_ENZYME:3.4.11.15			1367929	1370466	2538	YP_810625.1	lysyl aminopeptidase	75.65	842	205	0	1:2526	1:842	0.0	1320
OKIT_1404	orf01540_AWRIB616_contig1_group1_1371571_1370933_len=639	fig|336988.4.peg.1413	group-specific protein			1371571	1370933	639	No_hit
OKIT_1405	orf01541_AWRIB616_contig1_group1_1372782_1371613_len=1170	fig|336988.4.peg.1414	Thymidine kinase			1372782	1371613	1170	YP_811047.1	hypothetical protein	36.80	394	234	5	16:1152	9:402	4e-74	270
OKIT_1406	orf01542_AWRIB616_contig1_group1_1373169_1372807_len=363	fig|336988.4.peg.1415	hypothetical protein	MerR family transcriptional regulator		1373169	1372807	363	No_hit
OKIT_1407	orf01543_AWRIB616_contig1_group1_1373285_1373533_len=249	fig|336988.4.peg.1416	hypothetical protein			1373285	1373533	249	No_hit
OKIT_1408	orf01544_AWRIB616_contig1_group1_1373767_1375038_len=1272	fig|336988.4.peg.1417	putative drug resistance transporter			1373767	1375038	1272	YP_811350.1	major facilitator superfamily permease	22.35	425	286	14	19:1224	44:447	3e-21	95.1
OKIT_1409	orf01545_AWRIB616_contig1_group1_1375887_1375090_len=798	fig|336988.4.peg.1418	lipase/esterase			1375887	1375090	798	YP_811274.1	esterase/lipase	43.56	264	146	2	4:795	3:263	3e-64	237
OKIT_1410	orf01546_AWRIB616_contig1_group1_1376180_1375899_len=282	fig|336988.4.peg.1419	hypothetical protein	Putative bacteriocin (BAGEL)	Bacteriocin	1376180	1375899	282	No_hit
OKIT_1411	orf01547_AWRIB616_contig1_group1_1377176_1376295_len=882	fig|336988.4.peg.1420	Transcription regulator [contains diacylglycerol kinase catalytic domain]			1377176	1376295	882	No_hit
OKIT_1412	orf01548_AWRIB616_contig1_group1_1377914_1377279_len=636	fig|336988.4.peg.1421	Uridine kinase (EC 2.7.1.48);Ontology_term=KEGG_ENZYME:2.7.1.48			1377914	1377279	636	YP_810606.1	uridine kinase	75.60	209	51	0	1:627	1:209	2e-90	323
OKIT_1413	orf01549_AWRIB616_contig1_group1_1378015_1379331_len=1317	fig|336988.4.peg.1422	Aminopeptidase C (EC 3.4.22.40);Ontology_term=KEGG_ENZYME:3.4.22.40			1378015	1379331	1317	YP_809686.1	cysteine aminopeptidase	63.84	437	158	0	1:1311	1:437	2e-172	597
OKIT_1414	orf01550_AWRIB616_contig1_group1_1380665_1379373_len=1293	fig|336988.4.peg.1423	amino acid permease			1380665	1379373	1293	YP_810729.1	amino acid transporter	24.88	430	294	7	1:1212	13:439	3e-34	138
OKIT_1415	orf01551_AWRIB616_contig1_group1_1381404_1380655_len=750	fig|336988.4.peg.1424	Glutamine amidotransferase2C class I			1381404	1380655	750	YP_810605.1	glutamine amidotransferase	69.67	244	74	0	1:732	1:244	5e-102	362
OKIT_1416	orf01552_AWRIB616_contig1_group1_1381757_1381488_len=270	fig|336988.4.peg.1425	SSU ribosomal protein S14p (S29e)			1381757	1381488	270	YP_810604.1	SSU ribosomal protein S14P	92.13	89	7	0	1:267	1:89	2e-44	168
OKIT_1417	orf01553_AWRIB616_contig1_group1_1381921_1381757_len=165	fig|336988.4.peg.1426	LSU ribosomal protein L33p			1381921	1381757	165	YP_810603.1	50S ribosomal protein L33P	92.59	54	4	0	1:162	1:54	2e-25	105
OKIT_1418	orf01554_AWRIB616_contig1_group1_1382941_1382021_len=921	fig|336988.4.peg.1427	Manganese-dependent inorganic pyrophosphatase (EC 3.6.1.1);Ontology_term=KEGG_ENZYME:3.6.1.1			1382941	1382021	921	YP_810602.1	inorganic pyrophosphatase/exopolyphosphatase	79.02	305	64	0	1:915	1:305	6e-138	482
OKIT_1419	orf01555_AWRIB616_contig1_group1_1385371_1382942_len=2430	fig|336988.4.peg.1428	Topoisomerase IV subunit A (EC 5.99.1.-);Ontology_term=KEGG_ENZYME:5.99.1.-			1385371	1382942	2430	YP_810601.1	DNA topoisomerase IV subunit A	80.96	809	154	0	1:2427	1:809	0.0	1304
OKIT_1420	orf01556_AWRIB616_contig1_group1_1387374_1385371_len=2004	fig|336988.4.peg.1429	Topoisomerase IV subunit B (EC 5.99.1.-);Ontology_term=KEGG_ENZYME:5.99.1.-			1387374	1385371	2004	YP_810600.1	DNA topoisomerase IV subunit B	88.57	665	76	0	1:1995	8:672	0.0	1182
OKIT_1421	orf01557_AWRIB616_contig1_group1_1387527_1388093_len=567	fig|336988.4.peg.1430	Acyl-phosphate:glycerol-3-phosphate O-acyltransferase PlsY			1387527	1388093	567	YP_810599.1	acyl-phosphate glycerol-3-phosphate	71.43	189	53	1	1:564	19:207	6e-79	285
OKIT_1422	orf01558_AWRIB616_contig1_group1_1388966_1388076_len=891	fig|336988.4.peg.1431	Galactose mutarotase related enzyme			1388966	1388076	891	YP_810598.1	galactose mutarotase-like protein	59.33	300	116	2	1:888	1:298	9e-105	372
OKIT_1423	orf01559_AWRIB616_contig1_group1_1389888_1388956_len=933	fig|336988.4.peg.1432	Site-specific tyrosine recombinase			1389888	1388956	933	YP_810597.1	tyrosine recombinase XerC subunit	69.67	300	91	0	31:930	8:307	1e-125	441
OKIT_1424	orf01560_AWRIB616_contig1_group1_1390019_1390591_len=573	fig|336988.4.peg.1433	hypothetical protein			1390019	1390591	573	No_hit
OKIT_1425	orf01561_AWRIB616_contig1_group1_1392665_1390644_len=2022	fig|336988.4.peg.1434	DNA topoisomerase I (EC 5.99.1.2);Ontology_term=KEGG_ENZYME:5.99.1.2			1392665	1390644	2022	YP_810595.1	DNA topoisomerase I	86.14	664	92	0	1:1992	1:664	0.0	1182
OKIT_1426	orf01562_AWRIB616_contig1_group1_1393588_1392701_len=888	fig|336988.4.peg.1435	Rossmann fold nucleotide-binding protein Smf possibly involved in DNA uptake			1393588	1392701	888	YP_810594.1	Rossmann fold nucleotide-binding protein for DNA	66.78	295	98	0	1:885	1:295	7e-118	415
OKIT_1427	orf01563_AWRIB616_contig1_group1_1394246_1393614_len=633	fig|336988.4.peg.1436	Ribonuclease HII (EC 3.1.26.4);Ontology_term=KEGG_ENZYME:3.1.26.4			1394246	1393614	633	YP_810593.1	RNase HII	69.38	209	64	0	1:627	1:209	2e-80	290
OKIT_1428	orf01564_AWRIB616_contig1_group1_1395099_1394251_len=849	fig|336988.4.peg.1437	50S ribosomal subunit maturation GTPase RbgA (B. subtilis YlqF)			1395099	1394251	849	YP_810592.1	GTPase	84.75	282	43	0	1:846	1:282	2e-139	487
OKIT_1429	orf01565_AWRIB616_contig1_group1_1395326_1395096_len=231	fig|336988.4.peg.1438	hypothetical protein			1395326	1395096	231	YP_810591.1	hypothetical protein	84.21	76	12	0	1:228	1:76	8e-36	140
OKIT_1430	orf01566_AWRIB616_contig1_group1_1395907_1395323_len=585	fig|336988.4.peg.1439	YfaA			1395907	1395323	585	YP_810590.1	hypothetical protein	57.22	194	83	0	1:582	1:194	1e-57	214
OKIT_1431	orf01567_AWRIB616_contig1_group1_1396794_1395892_len=903	fig|336988.4.peg.1440	FIG006988: Lipase/Acylhydrolase with GDSL-like motif			1396794	1395892	903	YP_810589.1	lysophospholipase L1 or related esterase	54.49	301	134	2	1:900	1:299	9e-94	335
OKIT_1432	orf01568_AWRIB616_contig1_group1_1397643_1396795_len=849	fig|336988.4.peg.1441	Hypothetical protein DUF1942C DegV family			1397643	1396795	849	YP_810588.1	hypothetical protein	78.37	282	61	0	1:846	1:282	6e-124	435
OKIT_1433	orf01569_AWRIB616_contig1_group1_1398164_1397652_len=513	fig|336988.4.peg.1442	Dihydrofolate reductase (EC 1.5.1.3);Ontology_term=KEGG_ENZYME:1.5.1.3			1398164	1397652	513	YP_810587.1	dihydrofolate reductase	65.88	170	58	0	1:510	1:170	1e-62	231
OKIT_1434	orf01570_AWRIB616_contig1_group1_1399329_1398130_len=1200	fig|336988.4.peg.1443	tRNA nucleotidyltransferase (EC 2.7.7.21) (EC 2.7.7.25);Ontology_term=KEGG_ENZYME:2.7.7.21,KEGG_ENZYME:2.7.7.25			1399329	1398130	1200	YP_810586.1	tRNA nucleotidyltransferase/poly(A) polymerase	59.40	399	162	0	1:1197	1:399	2e-137	480
OKIT_1435	orf01571_AWRIB616_contig1_group1_1400570_1399326_len=1245	fig|336988.4.peg.1444	TPR-repeat-containing protein2C putative component of Menaquinone-cytochrome C reductase			1400570	1399326	1245	YP_810585.1	TPR repeat-containing protein	62.62	412	154	0	1:1236	1:412	9e-154	535
OKIT_1436	orf01573_AWRIB616_contig1_group1_1400893_1400618_len=276	fig|336988.4.peg.1445	DNA-binding protein HBsu			1400893	1400618	276	YP_810584.1	nucleoid protein Hbs	97.80	91	2	0	1:273	1:91	3e-46	174
OKIT_1437	orf01574_AWRIB616_contig1_group1_1402383_1401055_len=1329	fig|336988.4.peg.1446	GTP-binding protein EngA			1402383	1401055	1329	YP_810583.1	GTPase	84.16	442	70	0	1:1326	1:442	0.0	756
OKIT_1438	orf01575_AWRIB616_contig1_group1_1403082_1402411_len=672	fig|336988.4.peg.1447	Cytidylate kinase (EC 2.7.4.14);Ontology_term=KEGG_ENZYME:2.7.4.14			1403082	1402411	672	YP_810582.1	cytidylate kinase	74.89	219	55	0	13:669	1:219	2e-93	333
OKIT_1439	orf01577_AWRIB616_contig1_group1_1404049_1403072_len=978	fig|336988.4.peg.1448	LysM domain			1404049	1403072	978	YP_810581.1	LysM domain-containing protein	35.19	341	170	9	22:975	192:504	3e-43	167
OKIT_1440	orf01578_AWRIB616_contig1_group1_1404648_1404076_len=573	fig|336988.4.peg.1449	Substrate-specific component RibU of riboflavin ECF transporter			1404648	1404076	573	YP_811194.1	hypothetical protein	63.93	183	66	0	22:570	4:186	3e-69	253
OKIT_1441	orf01579_AWRIB616_contig1_group1_1405355_1404645_len=711	fig|336988.4.peg.1450	Ribosomal large subunit pseudouridine synthase B (EC 4.2.1.70);Ontology_term=KEGG_ENZYME:4.2.1.70			1405355	1404645	711	YP_810580.1	ribosomal large subunit pseudouridine synthase	67.51	237	76	1	1:708	1:237	2e-92	330
OKIT_1442	orf01580_AWRIB616_contig1_group1_1405951_1405352_len=600	fig|336988.4.peg.1451	Segregation and condensation protein B			1405951	1405352	600	YP_810579.1	condensin subunit ScpB	64.97	197	68	1	1:591	1:196	9e-70	254
OKIT_1443	orf01581_AWRIB616_contig1_group1_1406694_1405948_len=747	fig|336988.4.peg.1452	Segregation and condensation protein A			1406694	1405948	747	YP_810578.1	condensin subunit ScpA	65.29	242	84	0	7:732	8:249	7e-86	308
OKIT_1444	orf01582_AWRIB616_contig1_group1_1407625_1406717_len=909	fig|336988.4.peg.1453	Tyrosine recombinase XerD			1407625	1406717	909	YP_810577.1	tyrosine recombinase XerD subunit	72.76	301	82	0	1:903	1:301	3e-128	449
OKIT_1445	orf01583_AWRIB616_contig1_group1_1407776_1408549_len=774	fig|336988.4.peg.1454	Phosphosulfolactate synthase (EC 4.4.1.19);Ontology_term=KEGG_ENZYME:4.4.1.19			1407776	1408549	774	YP_810065.1	tRNA-Thr	65.08	252	88	0	1:756	1:252	3e-91	326
OKIT_1446	orf01584_AWRIB616_contig1_group1_1410111_1408678_len=1434	fig|336988.4.peg.1455	Pyruvate kinase (EC 2.7.1.40);Ontology_term=KEGG_ENZYME:2.7.1.40			1410111	1408678	1434	YP_810576.1	pyruvate kinase	92.87	477	34	0	1:1431	1:477	0.0	878
OKIT_1447	orf01585_AWRIB616_contig1_group1_1413061_1410176_len=2886	fig|336988.4.peg.1456	DNA polymerase III alpha subunit (EC 2.7.7.7);Ontology_term=KEGG_ENZYME:2.7.7.7			1413061	1410176	2886	YP_810574.1	DNA polymerase III, alpha subunit	75.31	960	236	1	1:2880	1:959	0.0	1448
OKIT_1448	orf01586_AWRIB616_contig1_group1_1413139_1413336_len=198	fig|336988.4.peg.1457	hypothetical protein			1413139	1413336	198	No_hit
OKIT_1449	orf01587_AWRIB616_contig1_group1_1414575_1413352_len=1224	fig|336988.4.peg.1458	Tripeptide aminopeptidase (EC 3.4.11.4);Ontology_term=KEGG_ENZYME:3.4.11.4			1414575	1413352	1224	YP_810572.1	peptidase T	78.87	407	86	0	1:1221	1:407	0.0	668
OKIT_1450	orf01588_AWRIB616_contig1_group1_1415264_1414572_len=693	fig|336988.4.peg.1459	Putative tRNA-m1A22 methylase			1415264	1414572	693	YP_810571.1	SAM-dependent methyltransferase	59.13	230	93	1	1:687	1:230	7e-69	252
OKIT_1451	orf01589_AWRIB616_contig1_group1_1416688_1415333_len=1356	fig|336988.4.peg.1460	RNA polymerase sigma factor RpoD			1416688	1415333	1356	YP_810570.1	DNA-directed RNA polymerase, sigma subunit	86.03	458	57	1	1:1353	1:458	0.0	751
OKIT_1452	orf01590_AWRIB616_contig1_group1_1418543_1416681_len=1863	fig|336988.4.peg.1461	DNA primase (EC 2.7.7.-);Ontology_term=KEGG_ENZYME:2.7.7.-			1418543	1416681	1863	YP_810569.1	DNA primase	71.96	617	166	3	10:1860	1:610	0.0	892
OKIT_1453	orf01591_AWRIB616_contig1_group1_1420750_1418678_len=2073	fig|336988.4.peg.1462	Glycyl-tRNA synthetase beta chain (EC 6.1.1.14);Ontology_term=KEGG_ENZYME:6.1.1.14			1420750	1418678	2073	YP_810568.1	glycyl-tRNA synthetase, beta subunit	63.19	690	253	1	1:2070	1:689	0.0	884
OKIT_1454	orf01592_AWRIB616_contig1_group1_1421563_1420754_len=810	fig|336988.4.peg.1463	hypothetical protein			1421563	1420754	810	YP_810567.1	hypothetical protein	49.44	269	135	1	1:804	1:269	2e-77	280
OKIT_1455	orf01593_AWRIB616_contig1_group1_1422524_1421550_len=975	fig|336988.4.peg.1464	Glycyl-tRNA synthetase alpha chain (EC 6.1.1.14);Ontology_term=KEGG_ENZYME:6.1.1.14			1422524	1421550	975	YP_810566.1	glycyl-tRNA synthetase subunit alpha	85.22	318	47	0	1:954	1:318	1e-161	560
OKIT_1456	orf01594_AWRIB616_contig1_group1_1422886_1423764_len=879	fig|336988.4.peg.1465	Proline iminopeptidase (EC 3.4.11.5);Ontology_term=KEGG_ENZYME:3.4.11.5			1422886	1423764	879	YP_809890.1	alpha/beta fold family hydrolase	25.63	277	180	6	76:864	26:290	2e-22	98.2
OKIT_1457	orf01595_AWRIB616_contig1_group1_1425015_1423855_len=1161	fig|336988.4.peg.1466	Acetylornithine deacetylase (EC 3.5.1.16);Ontology_term=KEGG_ENZYME:3.5.1.16			1425015	1423855	1161	YP_810565.1	acetylornithine deacetylase	72.73	385	105	0	1:1155	17:401	2e-161	560
OKIT_1458	orf01596_AWRIB616_contig1_group1_1425820_1425050_len=771	fig|336988.4.peg.1467	DNA recombination and repair protein RecO			1425820	1425050	771	YP_810564.1	DNA replication and repair protein RecO	68.63	255	80	0	1:765	1:255	1e-101	361
OKIT_1459	orf01597_AWRIB616_contig1_group1_1426737_1425820_len=918	fig|336988.4.peg.1468	GTP-binding protein Era			1426737	1425820	918	YP_810563.1	GTPase	84.54	304	47	0	1:912	1:304	1e-148	517
OKIT_1460	orf01599_AWRIB616_contig1_group1_1427187_1426750_len=438	fig|336988.4.peg.1469	Diacylglycerol kinase (EC 2.7.1.107);Ontology_term=KEGG_ENZYME:2.7.1.107			1427187	1426750	438	YP_810562.1	diacylglycerol kinase	85.52	145	21	0	1:435	1:145	2e-70	256
OKIT_1461	orf01600_AWRIB616_contig1_group1_1427632_1427171_len=462	fig|336988.4.peg.1470	FIG000233: metal-dependent hydrolase			1427632	1427171	462	YP_810561.1	metal-dependent hydrolase	81.05	153	29	0	1:459	1:153	2e-68	249
OKIT_1462	orf01601_AWRIB616_contig1_group1_1428611_1427625_len=987	fig|336988.4.peg.1471	Phosphate starvation-inducible protein PhoH2C predicted ATPase			1428611	1427625	987	YP_810560.1	phosphate starvation-inducible protein PhoH,	85.37	328	48	0	1:984	1:328	1e-159	554
OKIT_1463	orf01602_AWRIB616_contig1_group1_1429057_1428608_len=450	fig|336988.4.peg.1472	Transamidase GatB domain protein			1429057	1428608	450	YP_810559.1	GatB/YqeY domain-containing protein	71.62	148	42	0	1:444	1:148	2e-54	203
OKIT_1464	orf01603_AWRIB616_contig1_group1_1429307_1429113_len=195	fig|336988.4.peg.1473	SSU ribosomal protein S21p			1429307	1429113	195	YP_810558.1	SSU ribosomal protein S21P	100.00	64	0	0	1:192	1:64	6e-32	127
OKIT_1465	orf01605_AWRIB616_contig1_group1_1433688_1429375_len=4314	fig|336988.4.peg.1474	DNA polymerase III alpha subunit (EC 2.7.7.7);Ontology_term=KEGG_ENZYME:2.7.7.7			1433688	1429375	4314	YP_810557.1	DNA polymerase III, alpha subunit ( type)	83.86	1437	232	0	1:4311	1:1437	0.0	2452
OKIT_1466	orf01606_AWRIB616_contig1_group1_1435402_1433693_len=1710	fig|336988.4.peg.1475	Prolyl-tRNA synthetase (EC 6.1.1.15);Ontology_term=KEGG_ENZYME:6.1.1.15			1435402	1433693	1710	YP_810556.1	prolyl-tRNA synthetase	76.14	570	135	1	1:1707	1:570	0.0	878
OKIT_1467	orf01607_AWRIB616_contig1_group1_1436678_1435407_len=1272	fig|336988.4.peg.1476	Membrane-associated zinc metalloprotease			1436678	1435407	1272	YP_810555.1	peptidase RseP	65.96	423	142	1	1:1269	1:421	2e-163	567
OKIT_1468	orf01608_AWRIB616_contig1_group1_1437475_1436675_len=801	fig|336988.4.peg.1477	Phosphatidate cytidylyltransferase (EC 2.7.7.41);Ontology_term=KEGG_ENZYME:2.7.7.41			1437475	1436675	801	YP_810554.1	CDP-diglyceride synthetase	76.23	265	63	0	1:795	1:265	5e-120	422
OKIT_1469	orf01610_AWRIB616_contig1_group1_1438227_1437472_len=756	fig|336988.4.peg.1478	Undecaprenyl pyrophosphate synthetase (EC 2.5.1.31);Ontology_term=KEGG_ENZYME:2.5.1.31			1438227	1437472	756	YP_810553.1	undecaprenyl pyrophosphate synthetase	70.49	244	72	0	22:753	11:254	2e-100	357
OKIT_1470	orf01611_AWRIB616_contig1_group1_1438769_1438227_len=543	fig|336988.4.peg.1479	Ribosome recycling factor			1438769	1438227	543	YP_810552.1	ribosome recycling factor	81.11	180	34	0	1:540	1:180	5e-82	295
OKIT_1471	orf01612_AWRIB616_contig1_group1_1439500_1438769_len=732	fig|336988.4.peg.1480	Uridylate kinase (EC 2.7.4.-);Ontology_term=KEGG_ENZYME:2.7.4.-			1439500	1438769	732	YP_810551.1	uridylate kinase	88.48	243	28	0	1:729	1:243	3e-120	423
OKIT_1472	orf01613_AWRIB616_contig1_group1_1440383_1439505_len=879	fig|336988.4.peg.1481	Translation elongation factor Ts			1440383	1439505	879	YP_810550.1	translation elongation factor Ts (EF-Ts)	79.45	292	60	0	1:876	1:292	1e-131	461
OKIT_1473	orf01614_AWRIB616_contig1_group1_1441221_1440427_len=795	fig|336988.4.peg.1482	SSU ribosomal protein S2p (SAe)			1441221	1440427	795	YP_810549.1	SSU ribosomal protein S2P	92.28	259	20	0	1:777	1:259	1e-135	474
OKIT_1474	orf01615_AWRIB616_contig1_group1_1442348_1441356_len=993	fig|336988.4.peg.1483	COG4123: Predicted O-methyltransferase			1442348	1441356	993	YP_810548.1	O-methyltransferase	60.00	330	132	0	1:990	1:330	5e-114	402
OKIT_1475	orf01616_AWRIB616_contig1_group1_1442369_1442992_len=624	fig|336988.4.peg.1484	1-acyl-sn-glycerol-3-phosphate acyltransferase (EC 2.3.1.51);Ontology_term=KEGG_ENZYME:2.3.1.51			1442369	1442992	624	YP_810547.1	1-acyl-sn-glycerol-3-phosphate acyltransferase	67.70	161	52	0	139:621	1:161	2e-63	234
OKIT_1476	orf01617_AWRIB616_contig1_group1_1443228_1443022_len=207	fig|336988.4.peg.1485	FIG00885542: hypothetical protein			1443228	1443022	207	YP_810546.1	hypothetical protein	88.24	68	8	0	1:204	1:68	9e-33	130
OKIT_1477	orf01618_AWRIB616_contig1_group1_1443537_1443232_len=306	fig|336988.4.peg.1486	FIG00886035: hypothetical protein			1443537	1443232	306	YP_810545.1	hypothetical protein	83.17	101	17	0	1:303	1:101	9e-45	170
OKIT_1478	orf01619_AWRIB616_contig1_group1_1443666_1444304_len=639	fig|336988.4.peg.1487	SOS-response repressor and protease LexA (EC 3.4.21.88);Ontology_term=KEGG_ENZYME:3.4.21.88			1443666	1444304	639	YP_810544.1	XRE family transcriptional regulator	91.98	212	17	0	1:636	1:212	9e-113	397
OKIT_1479	tRNA	fig|336988.4.rna.20	tRNA-Ser-CGA			1444355	1444443
OKIT_1480	orf01620_AWRIB616_contig1_group1_1444527_1445351_len=825	fig|336988.4.peg.1488	immunity protein PlnI2C membrane-bound protease CAAX family			1444527	1445351	825	YP_810541.1	tRNA-Ser	49.20	250	121	1	91:822	3:252	4e-64	236
OKIT_1481	orf01621_AWRIB616_contig1_group1_1446349_1445348_len=1002	fig|336988.4.peg.1489	DNA polymerase III delta subunit (EC 2.7.7.7);Ontology_term=KEGG_ENZYME:2.7.7.7			1446349	1445348	1002	YP_810540.1	DNA polymerase III, delta subunit	55.42	332	146	2	1:996	1:330	6e-104	369
OKIT_1482	orf01622_AWRIB616_contig1_group1_1448477_1446336_len=2142	fig|336988.4.peg.1490	Late competence protein ComEC2C DNA transport			1448477	1446336	2142	YP_810539.1	membrane metal-binding protein	51.82	303	146	0	109:1017	1:303	7e-88	317
OKIT_1483	orf01623_AWRIB616_contig1_group1_1449345_1448617_len=729	fig|336988.4.peg.1491	Late competence protein ComEA2C DNA receptor			1449345	1448617	729	YP_810538.1	DNA uptake protein or related DNA-binding	58.47	118	40	2	373:726	1:109	3e-35	140
OKIT_1484	orf01624_AWRIB616_contig1_group1_1449886_1449380_len=507	fig|336988.4.peg.1492	FIG00885722: hypothetical protein			1449886	1449380	507	YP_810536.1	hypothetical protein	83.33	168	28	0	1:504	1:168	2e-87	313
OKIT_1485	orf01625_AWRIB616_contig1_group1_1450976_1449888_len=1089	fig|336988.4.peg.1493	Aminopeptidase YpdF (MP-2C MA-2C MS-2C AP-2C NP- specific)			1450976	1449888	1089	YP_810535.1	aminopeptidase P	75.35	361	89	0	1:1083	1:361	5e-164	569
OKIT_1486	orf01626_AWRIB616_contig1_group1_1451343_1451026_len=318	fig|336988.4.peg.1494	LSU ribosomal protein L27p			1451343	1451026	318	YP_810534.1	50S ribosomal protein L27	93.14	102	7	0	1:306	1:102	1e-52	196
OKIT_1487	orf01627_AWRIB616_contig1_group1_1451656_1451354_len=303	fig|336988.4.peg.1495	LSU ribosomal protein L21p			1451656	1451354	303	YP_810533.1	50S ribosomal protein L21P	90.00	100	10	0	1:300	1:100	1e-50	189
OKIT_1488	orf01628_AWRIB616_contig1_group1_1452290_1451778_len=513	fig|336988.4.peg.1496	FIG00885937: hypothetical protein			1452290	1451778	513	YP_810532.1	hypothetical protein	74.27	171	43	1	1:510	1:171	9e-70	254
OKIT_1489	tRNA	fig|336988.4.rna.21	tRNA-Arg-TCT			1452371	1452298
OKIT_1490	orf01629_AWRIB616_contig1_group1_1453335_1452409_len=927	fig|336988.4.peg.1497	hypothetical protein			1453335	1452409	927	YP_810531.1	tRNA-Arg	39.47	304	181	2	16:924	7:308	1e-63	235
OKIT_1491	orf01630_AWRIB616_contig1_group1_1454039_1453335_len=705	fig|336988.4.peg.1498	FIG00885679: hypothetical protein			1454039	1453335	705	YP_810530.1	hypothetical protein	66.24	234	79	0	1:702	1:234	7e-94	335
OKIT_1492	orf01632_AWRIB616_contig1_group1_1455451_1454108_len=1344	fig|336988.4.peg.1499	Glutamine synthetase type I (EC 6.3.1.2);Ontology_term=KEGG_ENZYME:6.3.1.2			1455451	1454108	1344	YP_810529.1	L-glutamine synthetase	91.05	447	40	0	1:1341	1:447	0.0	823
OKIT_1493	orf01635_AWRIB616_contig1_group1_1455783_1455451_len=333	fig|336988.4.peg.1500	Transcriptional regulator2C MerR family			1455783	1455451	333	YP_810528.1	glutamine synthetase repressor	92.73	110	8	0	1:330	1:110	2e-54	202
OKIT_1494	orf01636_AWRIB616_contig1_group1_1456625_1455855_len=771	fig|336988.4.peg.1501	tRNA delta(2)-isopentenylpyrophosphate transferase (EC 2.5.1.8);Ontology_term=KEGG_ENZYME:2.5.1.8			1456625	1455855	771	YP_810527.1	tRNA delta(2)-isopentenylpyrophosphate	60.40	250	99	0	16:765	7:256	9e-87	311
OKIT_1495	orf01637_AWRIB616_contig1_group1_1457367_1456615_len=753	fig|336988.4.peg.1502	Glycerophosphoryl diester phosphodiesterase (EC 3.1.4.46);Ontology_term=KEGG_ENZYME:3.1.4.46			1457367	1456615	753	YP_810526.1	glycerophosphoryl diester phosphodiesterase	58.54	246	100	2	7:741	13:257	5e-81	292
OKIT_1496	orf01639_AWRIB616_contig1_group1_1458639_1457404_len=1236	fig|336988.4.peg.1503	Gamma-glutamyl phosphate reductase (EC 1.2.1.41);Ontology_term=KEGG_ENZYME:1.2.1.41			1458639	1457404	1236	YP_810525.1	glutamate-5-semialdehyde dehydrogenase	65.44	408	141	0	10:1233	13:420	7e-153	532
OKIT_1497	orf01640_AWRIB616_contig1_group1_1459456_1458656_len=801	fig|336988.4.peg.1504	Glutamate 5-kinase (EC 2.7.2.11);Ontology_term=KEGG_ENZYME:2.7.2.11			1459456	1458656	801	YP_810524.1	glutamate 5-kinase	73.31	266	71	0	1:798	1:266	8e-110	388
OKIT_1498	orf01642_AWRIB616_contig1_group1_1460219_1459443_len=777	fig|336988.4.peg.1505	Pyrroline-5-carboxylate reductase (EC 1.5.1.2);Ontology_term=KEGG_ENZYME:1.5.1.2			1460219	1459443	777	YP_810523.1	pyrroline-5-carboxylate reductase	49.61	258	130	0	1:774	1:258	1e-68	251
OKIT_1499	orf01643_AWRIB616_contig1_group1_1461539_1460229_len=1311	fig|336988.4.peg.1506	FIG00885909: hypothetical protein			1461539	1460229	1311	YP_810522.1	hypothetical protein	87.84	436	53	0	1:1308	12:447	0.0	749
OKIT_1500	orf01644_AWRIB616_contig1_group1_1461856_1461584_len=273	fig|336988.4.peg.1507	ACT domain protein			1461856	1461584	273	YP_810521.1	hypothetical protein	77.78	90	20	0	1:270	1:90	1e-34	136
OKIT_1501	orf01645_AWRIB616_contig1_group1_1462713_1461853_len=861	fig|336988.4.peg.1508	Methylenetetrahydrofolate dehydrogenase (NADP+) (EC 1.5.1.5) / Methenyltetrahydrofolate cyclohydrolase (EC 3.5.4.9);Ontology_term=KEGG_ENZYME:1.5.1.5,KEGG_ENZYME:3.5.4.9			1462713	1461853	861	YP_810520.1	methenyltetrahydrofolate cyclohydrolase	66.19	281	95	0	1:843	1:281	2e-102	364
OKIT_1502	orf01646_AWRIB616_contig1_group1_1463122_1467576_len=4455	fig|336988.4.peg.1510	Glucosyltransferase GtfG			1463122	1467576	4455	YP_810155.1	YG repeat-containing glycosyl hydrolase	47.60	1458	700	14	10:4254	15:1451	0.0	1328
OKIT_1503	orf01647_AWRIB616_contig1_group1_1467789_1469108_len=1320	fig|336988.4.peg.1511	Argininosuccinate lyase (EC 4.3.2.1);Ontology_term=KEGG_ENZYME:4.3.2.1			1467789	1469108	1320	No_hit
OKIT_1504	orf01648_AWRIB616_contig1_group1_1469234_1470454_len=1221	fig|336988.4.peg.1512	Argininosuccinate synthase (EC 6.3.4.5);Ontology_term=KEGG_ENZYME:6.3.4.5			1469234	1470454	1221	No_hit
OKIT_1505	orf01649_AWRIB616_contig1_group1_1470455_1471132_len=678	fig|336988.4.peg.1513	polar amino acid ABC transporter2C inner membrane subunit			1470455	1471132	678	YP_811310.1	ABC-type amino acid transport system, permease	35.27	207	131	1	43:663	263:466	6e-38	149
OKIT_1506	orf01650_AWRIB616_contig1_group1_1471129_1471929_len=801	fig|336988.4.peg.1514	YqiX			1471129	1471929	801	No_hit
OKIT_1507	orf01651_AWRIB616_contig1_group1_1473268_1471961_len=1308	fig|336988.4.peg.1515	oxidoreductase			1473268	1471961	1308	YP_810111.1	ferric reductase	57.70	435	184	0	1:1305	1:435	8e-155	538
OKIT_1508	orf01652_AWRIB616_contig1_group1_1474106_1473261_len=846	fig|336988.4.peg.1516	thiamine biosynthesis lipoprotein precursor			1474106	1473261	846	YP_810110.1	thiamine biosynthesis membrane-associated	50.89	281	136	1	1:843	2:280	1e-80	291
OKIT_1509	orf01654_AWRIB616_contig1_group1_1474597_1474112_len=486	fig|336988.4.peg.1517	hypothetical protein			1474597	1474112	486	YP_810109.1	hypothetical protein	56.25	144	62	1	49:480	2:144	8e-44	168
OKIT_1510	orf01656_AWRIB616_contig1_group1_1476038_1474626_len=1413	fig|336988.4.peg.1518	alkaline phosphatase synthesis sensor protein			1476038	1474626	1413	YP_810108.1	Signal transduction histidine kinase	60.73	466	183	0	7:1404	3:468	9e-166	575
OKIT_1511	orf01657_AWRIB616_contig1_group1_1476726_1476040_len=687	fig|336988.4.peg.1519	Phosphate regulon transcriptional regulatory protein PhoB			1476726	1476040	687	YP_810107.1	DNA-binding response regulator	75.33	227	56	0	1:681	1:227	1e-96	344
OKIT_1512	orf01659_AWRIB616_contig1_group1_1477407_1476760_len=648	fig|336988.4.peg.1520	Membrane-associated phospholipid phosphatase			1477407	1476760	648	YP_810104.1	membrane-associated phospholipid phosphatase	45.41	207	113	0	1:621	1:207	4e-48	183
OKIT_1513	orf01660_AWRIB616_contig1_group1_1478005_1477400_len=606	fig|336988.4.peg.1521	DedA protein			1478005	1477400	606	YP_810103.1	hypothetical protein	63.33	180	64	1	13:552	24:201	3e-66	243
OKIT_1514	orf01661_AWRIB616_contig1_group1_1478271_1480268_len=1998	fig|336988.4.peg.1522	putative integral membrane protein			1478271	1480268	1998	No_hit
OKIT_1515	orf01662_AWRIB616_contig1_group1_1480492_1481469_len=978	fig|336988.4.peg.1523	Glycosyltransferase			1480492	1481469	978	YP_810105.1_YP_809870.1		51.91	314	149	1	28:969	1:312	1e-96	345
OKIT_1516	orf01663_AWRIB616_contig1_group1_1481501_1481674_len=174	fig|336988.4.peg.1524	hypothetical protein			1481501	1481674	174	No_hit
OKIT_1517	orf01664_AWRIB616_contig1_group1_1482011_1481706_len=306	fig|336988.4.peg.1525	PTS system2C fructose- and mannose-inducible putative EII component			1482011	1481706	306	No_hit
OKIT_1518	orf01665_AWRIB616_contig1_group1_1482874_1482044_len=831	fig|336988.4.peg.1526	PTS system2C fructose- and mannose-inducible IID component (EC 2.7.1.69);Ontology_term=KEGG_ENZYME:2.7.1.69			1482874	1482044	831	YP_810012.1	phosphotransferase system,	32.80	250	155	7	88:819	29:271	9e-32	129
OKIT_1519	orf01666_AWRIB616_contig1_group1_1483665_1482877_len=789	fig|336988.4.peg.1527	PTS system2C fructose- and mannose-inducible IIC component (EC 2.7.1.69);Ontology_term=KEGG_ENZYME:2.7.1.69			1483665	1482877	789	No_hit
OKIT_1520	orf01668_AWRIB616_contig1_group1_1484269_1483772_len=498	fig|336988.4.peg.1528	PTS system2C fructose- and mannose-inducible IIB component (EC 2.7.1.69);Ontology_term=KEGG_ENZYME:2.7.1.69			1484269	1483772	498	No_hit
OKIT_1521	orf01669_AWRIB616_contig1_group1_1484716_1484285_len=432	fig|336988.4.peg.1529	Phosphotransferase system2C mannose/fructose-specific component IIA			1484716	1484285	432	YP_810762.1	phosphotransferase system,	80.43	92	18	0	1:276	1:92	5e-38	148
OKIT_1522	orf01670_AWRIB616_contig1_group1_1485320_1486015_len=696	fig|336988.4.peg.1530	Deoxyribose-phosphate aldolase (EC 4.1.2.4);Ontology_term=KEGG_ENZYME:4.1.2.4			1485320	1486015	696	YP_810764.1	deoxyribose-phosphate aldolase	75.54	139	34	0	127:543	1:139	3e-59	220
OKIT_1523	orf01671_AWRIB616_contig1_group1_1489284_1486096_len=3189	fig|336988.4.peg.1531	Membrane protein			1489284	1486096	3189	No_hit
OKIT_1524	orf01672_AWRIB616_contig1_group1_1489921_1489340_len=582	fig|336988.4.peg.1532	transcriptional regulator2C tetR family2C putative			1489921	1489340	582	YP_809837.1	TetR family transcriptional regulator	56.25	192	84	0	1:576	1:192	3e-62	229
OKIT_1525	orf01673_AWRIB616_contig1_group1_1490572_1490015_len=558	fig|336988.4.peg.1533	Ribosomal-protein-L7p-serine acetyltransferase			1490572	1490015	558	YP_809861.1	acetyltransferase	52.46	183	87	0	1:549	1:183	1e-55	207
OKIT_1526	orf01674_AWRIB616_contig1_group1_1490826_1490584_len=243	fig|336988.4.peg.1534	FIG00885986: hypothetical protein			1490826	1490584	243	YP_811190.1	hypothetical protein	54.43	79	36	0	1:237	1:79	2e-21	92.8
OKIT_1527	tRNA	fig|336988.4.rna.22	tRNA-Leu-CAA			1491105	1491022
OKIT_1528	tRNA	fig|336988.4.rna.23	tRNA-His-GTG			1491229	1491156
OKIT_1529	tRNA	fig|336988.4.rna.24	tRNA-Trp-CCA			1491305	1491232
OKIT_1530	orf01675_AWRIB616_contig1_group1_1492363_1491392_len=972	fig|336988.4.peg.1535	Glucokinase (EC 2.7.1.2);Ontology_term=KEGG_ENZYME:2.7.1.2			1492363	1491392	972	YP_810502.1	tRNA-Leu	84.52	323	50	0	1:969	1:323	3e-163	566
OKIT_1531	orf01676_AWRIB616_contig1_group1_1493129_1492425_len=705	fig|336988.4.peg.1536	GlpG protein (membrane protein of glp regulon)			1493129	1492425	705	YP_810501.1	membrane-associated serine protease	62.07	232	84	1	1:696	9:236	2e-86	310
OKIT_1532	orf01677_AWRIB616_contig1_group1_1495621_1493189_len=2433	fig|336988.4.peg.1537	Phenylalanyl-tRNA synthetase beta chain (EC 6.1.1.20);Ontology_term=KEGG_ENZYME:6.1.1.20			1495621	1493189	2433	YP_810500.1	phenylalanyl-tRNA synthetase beta subunit	66.17	810	271	1	1:2430	1:807	0.0	1083
OKIT_1533	orf01678_AWRIB616_contig1_group1_1496665_1495622_len=1044	fig|336988.4.peg.1538	Phenylalanyl-tRNA synthetase alpha chain (EC 6.1.1.20);Ontology_term=KEGG_ENZYME:6.1.1.20			1496665	1495622	1044	YP_810499.1	phenylalanyl-tRNA synthetase, alpha subunit	80.40	347	68	0	1:1041	1:347	6e-166	575
OKIT_1534	orf01679_AWRIB616_contig1_group1_1497207_1496899_len=309	fig|336988.4.peg.1539	Transcriptional regulator			1497207	1496899	309	YP_810498.1	transcriptional regulator	86.27	102	14	0	1:306	1:102	6e-47	177
OKIT_1535	orf01680_AWRIB616_contig1_group1_1497996_1497229_len=768	fig|336988.4.peg.1540	FIG011178: rRNA methylase			1497996	1497229	768	YP_810497.1	rRNA methylase	85.10	255	38	0	1:765	1:255	1e-126	444
OKIT_1536	orf01681_AWRIB616_contig1_group1_1499024_1497996_len=1029	fig|336988.4.peg.1541	OxaI/YidC membrane insertion protein			1499024	1497996	1029	YP_810496.1	preprotein translocase subunit YidC	74.35	347	81	2	1:1026	1:344	6e-143	499
OKIT_1537	orf01682_AWRIB616_contig1_group1_1499590_1499036_len=555	fig|336988.4.peg.1542	COG1399 protein in cluster with ribosomal protein L32p2C Firmicutes subfamily			1499590	1499036	555	YP_810495.1	metal-binding protein	64.64	181	64	0	1:543	1:181	3e-69	253
OKIT_1538	orf01683_AWRIB616_contig1_group1_1500720_1499587_len=1134	fig|336988.4.peg.1543	FIG007079: UPF0348 protein family			1500720	1499587	1134	YP_810494.1	hypothetical protein	69.68	376	114	0	1:1128	1:376	3e-155	540
OKIT_1539	orf01684_AWRIB616_contig1_group1_1501460_1500717_len=744	fig|336988.4.peg.1544	FIG145533: Methyltransferase (EC 2.1.1.-);Ontology_term=KEGG_ENZYME:2.1.1.-			1501460	1500717	744	YP_810493.1	SAM-dependent methyltransferase	60.57	246	97	0	1:738	1:246	1e-86	311
OKIT_1540	orf01685_AWRIB616_contig1_group1_1501828_1501466_len=363	fig|336988.4.peg.1545	Iojap protein			1501828	1501466	363	YP_810492.1	Iojap family protein	62.50	120	45	0	1:360	1:120	2e-42	163
OKIT_1541	orf01687_AWRIB616_contig1_group1_1502398_1501829_len=570	fig|336988.4.peg.1546	Hydrolase (HAD superfamily)2C YqeK			1502398	1501829	570	YP_810491.1	HD superfamily NAD metabolism hydrolase	85.71	189	27	0	1:567	1:189	2e-97	347
OKIT_1542	orf01688_AWRIB616_contig1_group1_1503051_1502398_len=654	fig|336988.4.peg.1547	Nicotinate-nucleotide adenylyltransferase (EC 2.7.7.18);Ontology_term=KEGG_ENZYME:2.7.7.18			1503051	1502398	654	YP_810490.1	nicotinate-nucleotide adenylyltransferase	81.74	219	37	1	1:648	1:219	2e-102	363
OKIT_1543	orf01689_AWRIB616_contig1_group1_1503355_1503035_len=321	fig|336988.4.peg.1548	FIG004454: RNA binding protein			1503355	1503035	321	YP_810489.1	RNA-binding protein	83.02	106	18	0	1:318	1:106	6e-48	181
OKIT_1544	orf01690_AWRIB616_contig1_group1_1504524_1503370_len=1155	fig|336988.4.peg.1549	GTP-binding protein YqeH2C required for biogenesis of 30S ribosome subunit			1504524	1503370	1155	YP_810488.1	GTP-binding protein YqeH	64.94	385	134	1	1:1152	1:385	4e-149	520
OKIT_1545	orf01691_AWRIB616_contig1_group1_1505026_1504511_len=516	fig|336988.4.peg.1550	FIG001553: Hydrolase2C HAD subfamily IIIA			1505026	1504511	516	YP_810487.1	HAD superfamily hydrolase	77.06	170	39	0	4:513	4:173	7e-76	275
OKIT_1546	orf01692_AWRIB616_contig1_group1_1506040_1505078_len=963	fig|336988.4.peg.1551	CMP-binding-factor 1			1506040	1505078	963	YP_810486.1	HD-superfamily hydrolase	81.45	318	59	0	1:954	1:318	1e-151	528
OKIT_1547	orf01693_AWRIB616_contig1_group1_1508501_1506033_len=2469	fig|336988.4.peg.1552	DNA double-strand break repair rad50 ATPase			1508501	1506033	2469	YP_810485.1	DNA repair ATPase	59.37	822	333	1	1:2466	1:821	0.0	975
OKIT_1548	orf01694_AWRIB616_contig1_group1_1509718_1508498_len=1221	fig|336988.4.peg.1553	DNA repair exonuclease family protein YhaO			1509718	1508498	1221	YP_810484.1	DNA repair exonuclease	63.52	403	146	1	1:1209	10:411	4e-158	549
OKIT_1549	orf01695_AWRIB616_contig1_group1_1510107_1509763_len=345	fig|336988.4.peg.1554	putative transcriptional regulator			1510107	1509763	345	YP_810483.1	hypothetical protein	74.77	111	28	0	1:333	1:111	3e-44	168
OKIT_1550	orf01696_AWRIB616_contig1_group1_1512179_1510152_len=2028	fig|336988.4.peg.1555	Multimodular transpeptidase-transglycosylase (EC 2.4.1.129) (EC 3.4.-.-);Ontology_term=KEGG_ENZYME:2.4.1.129,KEGG_ENZYME:3.4.-.-			1512179	1510152	2028	YP_810481.1	arginyl-tRNA synthetase	67.98	684	207	2	10:2025	4:687	0.0	929
OKIT_1551	orf01697_AWRIB616_contig1_group1_1513882_1512182_len=1701	fig|336988.4.peg.1556	Arginyl-tRNA synthetase (EC 6.1.1.19);Ontology_term=KEGG_ENZYME:6.1.1.19			1513882	1512182	1701	No_hit
OKIT_1552	orf01698_AWRIB616_contig1_group1_1514249_1513971_len=279	fig|336988.4.peg.1557	FIG00886017: hypothetical protein			1514249	1513971	279	YP_810480.1	hypothetical protein	91.01	89	8	0	1:267	1:89	4e-44	167
OKIT_1553	orf01699_AWRIB616_contig1_group1_1515772_1514276_len=1497	fig|336988.4.peg.1558	UDP-N-acetylmuramoylalanyl-D-glutamate--L-lysine ligase (EC 6.3.2.7);Ontology_term=KEGG_ENZYME:6.3.2.7			1515772	1514276	1497	YP_810479.1	UDP-N-acetylmuramyl tripeptide synthase	71.06	501	140	2	1:1494	1:499	0.0	708
OKIT_1554	orf01700_AWRIB616_contig1_group1_1516954_1515818_len=1137	fig|336988.4.peg.1559	Nicotinamide-nucleotide adenylyltransferase2C NadR family (EC 2.7.7.1) / Ribosylnicotinamide kinase (EC 2.7.1.22);Ontology_term=KEGG_ENZYME:2.7.7.1,KEGG_ENZYME:2.7.1.22			1516954	1515818	1137	YP_810478.1	transcriptional regulator	85.71	378	54	0	1:1134	20:397	0.0	660
OKIT_1555	orf01701_AWRIB616_contig1_group1_1517071_1518192_len=1122	fig|336988.4.peg.1560	Aromatic amino acid aminotransferase gamma (EC 2.6.1.57) @ Aspartate aminotransferase (EC 2.6.1.1);Ontology_term=KEGG_ENZYME:2.6.1.57,KEGG_ENZYME:2.6.1.1			1517071	1518192	1122	YP_810477.1	aminotransferase	83.60	372	61	0	1:1116	21:392	2e-178	617
OKIT_1556	orf01702_AWRIB616_contig1_group1_1518185_1519366_len=1182	fig|336988.4.peg.1561	Aromatic amino acid aminotransferase gamma (EC 2.6.1.57) @ Aspartate aminotransferase (EC 2.6.1.1);Ontology_term=KEGG_ENZYME:2.6.1.57,KEGG_ENZYME:2.6.1.1			1518185	1519366	1182	YP_810476.1	aminotransferase	69.49	390	119	0	1:1170	1:390	6e-158	549
OKIT_1557	orf01703_AWRIB616_contig1_group1_1519400_1519972_len=573	fig|336988.4.peg.1562	LemA protein			1519400	1519972	573	YP_810475.1	hypothetical protein	64.21	190	68	0	1:570	1:190	2e-68	250
OKIT_1558	orf01704_AWRIB616_contig1_group1_1519969_1521942_len=1974	fig|336988.4.peg.1563	hypothetical membrane spanning protein			1519969	1521942	1974	No_hit
OKIT_1559	orf01705_AWRIB616_contig1_group1_1522078_1523511_len=1434	fig|336988.4.peg.1564	6-phosphogluconate dehydrogenase2C decarboxylating (EC 1.1.1.44);Ontology_term=KEGG_ENZYME:1.1.1.44			1522078	1523511	1434	YP_810474.1	6-phosphogluconate dehydrogenase	93.28	476	32	0	1:1428	1:476	0.0	902
OKIT_1560	orf01707_AWRIB616_contig1_group1_1524809_1523574_len=1236	fig|336988.4.peg.1565	Arginine deiminase (EC 3.5.3.6);Ontology_term=KEGG_ENZYME:3.5.3.6			1524809	1523574	1236	No_hit
OKIT_1561	orf01708_AWRIB616_contig1_group1_1524997_1525737_len=741	fig|336988.4.peg.1566	ABC transporter2C ATP-binding protein			1524997	1525737	741	YP_810336.1	ABC-type multidrug transport system, ATPase	54.78	230	104	0	34:723	10:239	4e-67	246
OKIT_1562	orf01709_AWRIB616_contig1_group1_1525734_1526849_len=1116	fig|336988.4.peg.1567	ABC transporter2C permease protein			1525734	1526849	1116	YP_810335.1	ABC-type multidrug transport system, permease	44.56	377	196	4	19:1113	2:377	1e-88	318
OKIT_1563	orf01710_AWRIB616_contig1_group1_1526851_1527501_len=651	fig|336988.4.peg.1568	Transcriptional regulator2C TetR family			1526851	1527501	651	YP_810334.1	transcriptional regulator	34.11	214	139	1	7:648	4:215	2e-31	127
OKIT_1564	orf01711_AWRIB616_contig1_group1_1527572_1528036_len=465	fig|336988.4.peg.1569	Purine trans deoxyribosylase (Nucleoside deoxyribosyltransferase-I) (EC 2.4.2.6);Ontology_term=KEGG_ENZYME:2.4.2.6			1527572	1528036	465	YP_810473.1	nucleotide deoxyribosyltransferase	73.38	154	41	0	1:462	1:154	5e-70	255
OKIT_1565	orf01712_AWRIB616_contig1_group1_1528168_1529595_len=1428	fig|336988.4.peg.1570	Nicotinate phosphoribosyltransferase (EC 2.4.2.11);Ontology_term=KEGG_ENZYME:2.4.2.11			1528168	1529595	1428	YP_810472.1	nicotinate phosphoribosyltransferase	72.25	472	129	1	1:1416	1:470	0.0	695
OKIT_1566	orf01713_AWRIB616_contig1_group1_1529717_1530202_len=486	fig|336988.4.peg.1571	Glutathione peroxidase family protein			1529717	1530202	486	YP_810470.1	glutathione peroxidase	74.52	157	40	0	1:471	1:157	8e-68	248
OKIT_1567	orf01714_AWRIB616_contig1_group1_1531122_1530250_len=873	fig|336988.4.peg.1572	Malate permease			1531122	1530250	873	YP_810755.1	AEC family permease	25.60	293	212	2	1:861	5:297	5e-22	97.1
OKIT_1568	orf01716_AWRIB616_contig1_group1_1532168_1531215_len=954	fig|336988.4.peg.1573	Integral membrane protein			1532168	1531215	954	YP_810421.1	hypothetical protein	65.62	317	109	0	1:951	1:317	1e-124	437
OKIT_1569	orf01717_AWRIB616_contig1_group1_1532386_1532646_len=261	fig|336988.4.peg.1574	hypothetical protein			1532386	1532646	261	No_hit
OKIT_1570	orf01718_AWRIB616_contig1_group1_1533152_1532679_len=474	fig|336988.4.peg.1575	S-ribosylhomocysteine lyase (EC 4.4.1.21) / Autoinducer-2 production protein LuxS;Ontology_term=KEGG_ENZYME:4.4.1.21			1533152	1532679	474	YP_811082.1	S-ribosylhomocysteinase	81.53	157	29	0	1:471	1:157	5e-74	268
OKIT_1571	orf01719_AWRIB616_contig1_group1_1533501_1533788_len=288	fig|336988.4.peg.1576	hypothetical protein			1533501	1533788	288	No_hit
OKIT_1572	tRNA	fig|336988.4.rna.25	tRNA-Leu-CAG			1533979	1533893
OKIT_1573	orf01720_AWRIB616_contig1_group1_1534087_1534473_len=387	fig|336988.4.peg.1577	Large-conductance mechanosensitive channel			1534087	1534473	387	YP_810436.1	tRNA-Leu	76.74	129	29	1	1:384	1:129	1e-50	190
OKIT_1574	orf01722_AWRIB616_contig1_group1_1534650_1535294_len=645	fig|336988.4.peg.1578	Deoxyadenosine kinase (EC 2.7.1.76) / Deoxyguanosine kinase (EC 2.7.1.113);Ontology_term=KEGG_ENZYME:2.7.1.76,KEGG_ENZYME:2.7.1.113			1534650	1535294	645	YP_810435.1	deoxynucleoside kinase	89.22	204	22	0	1:612	8:211	9e-111	391
OKIT_1575	orf01723_AWRIB616_contig1_group1_1536212_1535376_len=837	fig|336988.4.peg.1579	Undecaprenyl-diphosphatase (EC 3.6.1.27);Ontology_term=KEGG_ENZYME:3.6.1.27			1536212	1535376	837	YP_810434.1	undecaprenyl pyrophosphate phosphatase	85.92	277	39	0	1:831	1:277	5e-139	485
OKIT_1576	orf01724_AWRIB616_contig1_group1_1537640_1536222_len=1419	fig|336988.4.peg.1580	Xaa-His dipeptidase (EC 3.4.13.3);Ontology_term=KEGG_ENZYME:3.4.13.3			1537640	1536222	1419	YP_810433.1	peptidase V	64.47	470	167	0	7:1416	4:473	0.0	637
OKIT_1577	orf01725_AWRIB616_contig1_group1_1539323_1537647_len=1677	fig|336988.4.peg.1581	Membrane protein involved in the export of O-antigen2C teichoic acid lipoteichoic acids			1539323	1537647	1677	YP_810432.1	polysaccharide transporter	72.68	549	150	0	19:1665	1:549	0.0	789
OKIT_1578	orf01726_AWRIB616_contig1_group1_1540273_1539353_len=921	fig|336988.4.peg.1582	Oligopeptide transport ATP-binding protein OppF (TC 3.A.1.5.1)			1540273	1539353	921	YP_810431.1	ABC-type oligopeptide transport system, ATPase	88.20	305	36	0	1:915	1:305	3e-155	539
OKIT_1579	orf01727_AWRIB616_contig1_group1_1541424_1540270_len=1155	fig|336988.4.peg.1583	Oligopeptide transport ATP-binding protein OppD (TC 3.A.1.5.1)			1541424	1540270	1155	YP_810430.1	ABC-type dipeptide/oligopeptide/nickel transport	84.82	382	58	0	1:1146	1:382	0.0	659
OKIT_1580	orf01728_AWRIB616_contig1_group1_1542434_1541427_len=1008	fig|336988.4.peg.1584	Oligopeptide transport system permease protein OppC (TC 3.A.1.5.1)			1542434	1541427	1008	YP_810429.1	ABC-type dipeptide/oligopeptide/nickel transport	87.13	334	43	0	1:1002	1:334	2e-171	593
OKIT_1581	orf01730_AWRIB616_contig1_group1_1543327_1542434_len=894	fig|336988.4.peg.1585	Oligopeptide transport system permease protein OppB (TC 3.A.1.5.1)			1543327	1542434	894	YP_810428.1	ABC-type dipeptide/oligopeptide/nickel transport	87.80	295	36	0	1:885	1:295	3e-149	519
OKIT_1582	orf01731_AWRIB616_contig1_group1_1545086_1543422_len=1665	fig|336988.4.peg.1586	Oligopeptide ABC transporter2C periplasmic oligopeptide-binding protein OppA (TC 3.A.1.5.1)			1545086	1543422	1665	YP_810427.1	ABC-type oligopeptide transport system,	74.19	554	142	1	1:1662	1:553	0.0	853
OKIT_1583	orf01732_AWRIB616_contig1_group1_1546911_1545247_len=1665	fig|336988.4.peg.1587	Oligopeptide ABC transporter2C periplasmic oligopeptide-binding protein OppA (TC 3.A.1.5.1)			1546911	1545247	1665	YP_810427.1	ABC-type oligopeptide transport system,	73.65	554	145	1	1:1662	1:553	0.0	841
OKIT_1584	orf01734_AWRIB616_contig1_group1_1549579_1547147_len=2433	fig|336988.4.peg.1588	Leucyl-tRNA synthetase (EC 6.1.1.4);Ontology_term=KEGG_ENZYME:6.1.1.4			1549579	1547147	2433	YP_810425.1	leucyl-tRNA synthetase	85.06	810	121	0	1:2430	20:829	0.0	1458
OKIT_1585	orf01735_AWRIB616_contig1_group1_1550965_1549799_len=1167	fig|336988.4.peg.1589	S-adenosylmethionine synthetase (EC 2.5.1.6);Ontology_term=KEGG_ENZYME:2.5.1.6			1550965	1549799	1167	YP_810424.1	S-adenosylmethionine synthetase	88.86	386	43	0	1:1158	1:386	0.0	695
OKIT_1586	orf01736_AWRIB616_contig1_group1_1551150_1551956_len=807	fig|336988.4.peg.1590	hypothetical protein			1551150	1551956	807	YP_810423.1	hypothetical protein	34.05	232	153	0	106:801	16:247	3e-36	144
OKIT_1587	orf01737_AWRIB616_contig1_group1_1552779_1551958_len=822	fig|336988.4.peg.1591	Hydrolase (HAD superfamily)			1552779	1551958	822	YP_810422.1	HAD superfamily hydrolase	76.92	273	63	0	1:819	1:273	2e-122	430
OKIT_1588	orf01738_AWRIB616_contig1_group1_1552914_1553165_len=252	fig|336988.4.peg.1592	hypothetical protein			1552914	1553165	252	No_hit
OKIT_1589	orf01739_AWRIB616_contig1_group1_1554528_1553326_len=1203	fig|336988.4.peg.1593	deoxyribonuclease( EC:3.1.21.1 );Ontology_term=KEGG_ENZYME:3.1.21.1			1554528	1553326	1203	No_hit
OKIT_1590	orf01741_AWRIB616_contig1_group1_1555606_1554596_len=1011	fig|336988.4.peg.1594	Putative membrane protein YeiH			1555606	1554596	1011	YP_810351.1	hypothetical protein	70.96	334	92	1	1:1002	1:329	1e-131	461
OKIT_1591	orf01743_AWRIB616_contig1_group1_1555702_1556532_len=831	fig|336988.4.peg.1595	LysR family transcriptional regulator YeiE			1555702	1556532	831	YP_810743.1	transcriptional regulator	64.07	270	97	0	1:810	1:270	2e-98	350
OKIT_1592	orf01744_AWRIB616_contig1_group1_1556619_1557029_len=411	fig|336988.4.peg.1596	hypothetical protein			1556619	1557029	411	No_hit
OKIT_1593	orf01745_AWRIB616_contig1_group1_1557960_1557061_len=900	fig|336988.4.peg.1597	Acetyltransferase2C GNAT family			1557960	1557061	900	No_hit
OKIT_1594	orf01747_AWRIB616_contig1_group1_1558610_1558035_len=576	fig|336988.4.peg.1598	oxidoreductase( EC:1.- )			1558610	1558035	576	No_hit
OKIT_1595	orf01748_AWRIB616_contig1_group1_1558758_1559462_len=705	fig|336988.4.peg.1599	Pantothenate kinase (EC 2.7.1.33);Ontology_term=KEGG_ENZYME:2.7.1.33			1558758	1559462	705	YP_811120.1	pantothenate kinase	57.52	226	96	0	13:690	1:226	2e-76	277
OKIT_1596	orf01749_AWRIB616_contig1_group1_1559514_1560710_len=1197	fig|336988.4.peg.1600	Phosphopantothenoylcysteine decarboxylase (EC 4.1.1.36) / Phosphopantothenoylcysteine synthetase (EC 6.3.2.5);Ontology_term=KEGG_ENZYME:4.1.1.36,KEGG_ENZYME:6.3.2.5			1559514	1560710	1197	YP_810513.1	phosphopantothenoylcysteine decarboxylase /	64.14	396	141	1	4:1191	4:398	1e-143	501
OKIT_1597	orf01750_AWRIB616_contig1_group1_1561681_1560716_len=966	fig|336988.4.peg.1601	cell wall surface anchor family protein			1561681	1560716	966	No_hit
OKIT_1598	orf01751_AWRIB616_contig1_group1_1562245_1561700_len=546	fig|336988.4.peg.1602	hypothetical protein			1562245	1561700	546	No_hit
OKIT_1599	orf01752_AWRIB616_contig1_group1_1563076_1562285_len=792	fig|336988.4.peg.1603	ABC-type cobalt transport system2C permease component CbiQ or related transporter			1563076	1562285	792	YP_810415.1	ABC-type cobalt transport system, permease	49.61	254	128	0	28:789	1:254	2e-67	247
OKIT_1600	orf01753_AWRIB616_contig1_group1_1563959_1563069_len=891	fig|336988.4.peg.1604	ATPase component of general energizing module of ECF transporters			1563959	1563069	891	YP_810416.1	ABC-type cobalt transport system, ATPase	46.50	286	153	0	1:858	1:286	2e-73	267
OKIT_1601	orf01754_AWRIB616_contig1_group1_1564780_1563935_len=846	fig|336988.4.peg.1605	ABC-type cobalt transport system2C ATPase component			1564780	1563935	846	YP_810417.1	ABC-type cobalt transport system, ATPase	50.71	280	137	1	1:840	1:279	2e-81	294
OKIT_1602	orf01755_AWRIB616_contig1_group1_1565407_1564808_len=600	fig|336988.4.peg.1606	Substrate-specific component PanT of predicted pantothenate ECF transporter			1565407	1564808	600	No_hit
OKIT_1603	orf01756_AWRIB616_contig1_group1_1565671_1566729_len=1059	fig|336988.4.peg.1607	Alcohol dehydrogenase (EC 1.1.1.1);Ontology_term=KEGG_ENZYME:1.1.1.1			1565671	1566729	1059	YP_810864.1	Zn-dependent alcohol dehydrogenase	67.45	341	111	0	28:1050	39:379	3e-139	486
OKIT_1604	orf01757_AWRIB616_contig1_group1_1568165_1566735_len=1431	fig|336988.4.peg.1608	Voltage-gated chloride channel family protein			1568165	1566735	1431	No_hit
OKIT_1605	orf01759_AWRIB616_contig1_group1_1568422_1569561_len=1140	fig|336988.4.peg.1609	Na+/H+ antiporter			1568422	1569561	1140	YP_810887.1	Kef-type K+ transport system, membrane	49.86	345	167	1	103:1119	1:345	5e-92	330
OKIT_1606	orf01760_AWRIB616_contig1_group1_1569595_1569972_len=378	fig|336988.4.peg.1610	hypothetical protein			1569595	1569972	378	No_hit
OKIT_1607	orf01761_AWRIB616_contig1_group1_1569962_1570324_len=363	fig|336988.4.peg.1611	Protein crcB homolog 2			1569962	1570324	363	No_hit
OKIT_1608	orf01762_AWRIB616_contig1_group1_1571090_1570356_len=735	fig|336988.4.peg.1612	hypothetical protein			1571090	1570356	735	YP_810459.1	hypothetical protein	54.96	242	108	1	1:726	1:241	9e-75	271
OKIT_1609	orf01764_AWRIB616_contig1_group1_1572589_1571087_len=1503	fig|336988.4.peg.1613	Permeases of the major facilitator superfamily			1572589	1571087	1503	YP_810460.1	major facilitator superfamily permease	81.80	500	87	2	1:1500	1:496	0.0	810
OKIT_1610	orf01765_AWRIB616_contig1_group1_1572731_1573222_len=492	fig|336988.4.peg.1614	transcriptional regulator2C MerR family			1572731	1573222	492	YP_810461.1	MerR family transcriptional regulator	59.71	139	56	0	64:480	11:149	6e-44	168
OKIT_1611	orf01766_AWRIB616_contig1_group1_1573277_1574194_len=918	fig|336988.4.peg.1615	Inosine-uridine preferring nucleoside hydrolase (EC 3.2.2.1);Ontology_term=KEGG_ENZYME:3.2.2.1			1573277	1574194	918	YP_809812.1	ribonucleoside hydrolase RihC	38.64	295	178	1	31:906	2:296	3e-58	217
OKIT_1612	orf01767_AWRIB616_contig1_group1_1574821_1574225_len=597	fig|336988.4.peg.1616	hypothetical protein			1574821	1574225	597	No_hit
OKIT_1613	orf01769_AWRIB616_contig1_group1_1575005_1575658_len=654	fig|336988.4.peg.1617	Rrf2-linked NADH-flavin reductase			1575005	1575658	654	YP_810345.1	putative NADH-flavin reductase	62.96	216	80	0	1:648	1:216	1e-78	284
OKIT_1614	orf01770_AWRIB616_contig1_group1_1576274_1575720_len=555	fig|336988.4.peg.1618	NADPH-dependent FMN reductase			1576274	1575720	555	YP_810458.1	flavoprotein	70.11	184	55	0	1:552	1:184	3e-75	273
OKIT_1615	orf01771_AWRIB616_contig1_group1_1577258_1576356_len=903	fig|336988.4.peg.1619	magnesium transporter2C CorA family			1577258	1576356	903	YP_809828.1	Mg2+ and Co2+ transporter	26.30	289	199	5	55:894	17:300	5e-23	100
OKIT_1616	orf01772_AWRIB616_contig1_group1_1577407_1577604_len=198	fig|336988.4.peg.1620	hypothetical protein			1577407	1577604	198	No_hit
OKIT_1617	orf01774_AWRIB616_contig1_group1_1578521_1577643_len=879	fig|336988.4.peg.1621	N-acetylmuramoyl-L-alanine amidase (EC 3.5.1.28);Ontology_term=KEGG_ENZYME:3.5.1.28			1578521	1577643	879	YP_810009.1	N-acetylmuramoyl-L-alanine amidase	57.84	268	113	0	67:870	17:284	3e-93	333
OKIT_1618	orf01777_AWRIB616_contig1_group1_1578958_1578518_len=441	fig|336988.4.peg.1622	Fe2+/Zn2+ uptake regulation protein			1578958	1578518	441	YP_810748.1	Fe2+/Zn2+ uptake regulation protein	52.59	135	64	0	25:429	7:141	4e-38	149
OKIT_1619	orf01778_AWRIB616_contig1_group1_1579844_1579047_len=798	fig|336988.4.peg.1623	Zinc ABC transporter2C inner membrane permease protein ZnuB			1579844	1579047	798	YP_810745.1	ABC-type Mn2+/Zn2+ transport system, permease	57.20	264	113	0	1:792	1:264	4e-85	306
OKIT_1620	orf01779_AWRIB616_contig1_group1_1580539_1579856_len=684	fig|336988.4.peg.1624	Zinc ABC transporter2C ATP-binding protein ZnuC			1580539	1579856	684	YP_810746.1	ABC-type Mn/Zn transport system, ATPase	51.43	210	101	1	37:663	12:221	1e-56	211
OKIT_1621	orf01780_AWRIB616_contig1_group1_1581493_1580579_len=915	fig|336988.4.peg.1625	Zinc ABC transporter2C periplasmic-binding protein ZnuA			1581493	1580579	915	YP_810747.1	ABC-type metal ion transport system, periplasmic	61.97	305	112	3	7:912	5:308	3e-109	386
OKIT_1622	orf01782_AWRIB616_contig1_group1_1583079_1581682_len=1398	fig|336988.4.peg.1626	FIG00746169: hypothetical protein			1583079	1581682	1398	No_hit
OKIT_1623	orf01784_AWRIB616_contig1_group1_1583564_1583313_len=252	fig|336988.4.peg.1627	Predicted membrane protein			1583564	1583313	252	YP_809725.1	hypothetical protein	72.84	81	22	0	7:249	2:82	2e-33	132
OKIT_1624	orf01785_AWRIB616_contig1_group1_1583752_1584327_len=576	fig|336988.4.peg.1628	Dihydrofolate reductase (EC 1.5.1.3);Ontology_term=KEGG_ENZYME:1.5.1.3			1583752	1584327	576	No_hit
OKIT_1625	orf01786_AWRIB616_contig1_group1_1584423_1584935_len=513	fig|336988.4.peg.1629	putative acetyltransferase			1584423	1584935	513	No_hit
OKIT_1626	orf01787_AWRIB616_contig1_group1_1585344_1584940_len=405	fig|336988.4.peg.1630	Lactoylglutathione lyase and related lyases			1585344	1584940	405	No_hit
OKIT_1627	orf01788_AWRIB616_contig1_group1_1585823_1585353_len=471	fig|336988.4.peg.1631	Hit Family Protein			1585823	1585353	471	No_hit
OKIT_1628	orf01790_AWRIB616_contig1_group1_1586141_1585914_len=228	fig|336988.4.peg.1632	Glutaredoxin-like protein NrdH			1586141	1585914	228	No_hit
OKIT_1629	tRNA	fig|336988.4.rna.26	tRNA-Cys-GCA			1586377	1586307
OKIT_1630	orf01791_AWRIB616_contig1_group1_1586444_1587268_len=825	fig|336988.4.peg.1633	Hydrolase (HAD superfamily)			1586444	1587268	825	YP_810403.1	tRNA-Cys	75.55	274	67	0	1:822	1:274	9e-125	438
OKIT_1631	orf01792_AWRIB616_contig1_group1_1589701_1587311_len=2391	fig|336988.4.peg.1634	Alpha-glucosidase (EC 3.2.1.20);Ontology_term=KEGG_ENZYME:3.2.1.20			1589701	1587311	2391	No_hit
OKIT_1632	orf01793_AWRIB616_contig1_group1_1590438_1589740_len=699	fig|336988.4.peg.1635	hypothetical protein			1590438	1589740	699	No_hit
OKIT_1633	orf01794_AWRIB616_contig1_group1_1591339_1590458_len=882	fig|336988.4.peg.1636	binding-protein-dependent transport systems inner membrane component			1591339	1590458	882	YP_809903.1	ABC-type maltose transport system, permease	29.89	281	179	6	25:858	5:270	4e-34	137
OKIT_1634	orf01795_AWRIB616_contig1_group1_1592255_1591356_len=900	fig|336988.4.peg.1637	Predicted beta-xyloside ABC transporter2C permease component			1592255	1591356	900	YP_809902.1	ABC-type sugar transport system, permease	25.34	296	206	8	7:870	16:304	9e-22	96.3
OKIT_1635	orf01796_AWRIB616_contig1_group1_1593986_1592337_len=1650	fig|336988.4.peg.1638	Putative sugar binding protein2C ABC transport system precursor			1593986	1592337	1650	No_hit
OKIT_1636	orf01797_AWRIB616_contig1_group1_1595336_1594293_len=1044	fig|336988.4.peg.1639	transcriptional regulator2C LacI family			1595336	1594293	1044	YP_810398.1	transcriptional regulator	74.34	343	88	0	1:1029	1:343	2e-149	520
OKIT_1637	orf01798_AWRIB616_contig1_group1_1597333_1595498_len=1836	fig|336988.4.peg.1640	GTP-binding protein TypA/BipA			1597333	1595498	1836	YP_810397.1	stress response membrane GTPase	92.31	611	47	0	1:1833	1:611	0.0	1134
OKIT_1638	orf01799_AWRIB616_contig1_group1_1597442_1597999_len=558	fig|336988.4.peg.1641	Peptide deformylase (EC 3.5.1.88);Ontology_term=KEGG_ENZYME:3.5.1.88			1597442	1597999	558	YP_810396.1	peptide deformylase	85.95	185	26	0	1:555	1:185	1e-94	337
OKIT_1639	orf01800_AWRIB616_contig1_group1_1599108_1598029_len=1080	fig|336988.4.peg.1642	hypothetical protein			1599108	1598029	1080	YP_810395.1	cell wall-associated hydrolase	57.43	397	129	5	1:1077	1:395	1e-115	408
OKIT_1640	orf01802_AWRIB616_contig1_group1_1599528_1599343_len=186	fig|336988.4.peg.1644	4-oxalocrotonate tautomerase			1599528	1599343	186	No_hit
OKIT_1641	orf01803_AWRIB616_contig1_group1_1600435_1599509_len=927	fig|336988.4.peg.1645	Protein of unknown function DUF161			1600435	1599509	927	YP_810898.1	hypothetical protein	31.05	248	159	6	91:819	30:270	4e-30	124
OKIT_1642	orf01804_AWRIB616_contig1_group1_1600867_1600481_len=387	fig|336988.4.peg.1646	LSU ribosomal protein L19p			1600867	1600481	387	YP_810393.1	50S ribosomal protein L19	92.19	128	10	0	1:384	35:162	3e-63	232
OKIT_1643	orf01805_AWRIB616_contig1_group1_1601715_1600966_len=750	fig|336988.4.peg.1647	tRNA (Guanine37-N1) -methyltransferase (EC 2.1.1.31);Ontology_term=KEGG_ENZYME:2.1.1.31			1601715	1600966	750	YP_810392.1	tRNA (Guanine37-N1) methyltransferase	79.12	249	52	0	1:747	1:249	4e-118	416
OKIT_1644	orf01807_AWRIB616_contig1_group1_1602208_1601705_len=504	fig|336988.4.peg.1648	16S rRNA processing protein RimM			1602208	1601705	504	YP_810391.1	16S rRNA processing protein RimM	65.87	167	56	1	1:501	1:166	6e-63	231
OKIT_1645	orf01808_AWRIB616_contig1_group1_1602710_1602177_len=534	fig|336988.4.peg.1649	adaptive response regulator protein			1602710	1602177	534	YP_810390.1	methylated DNA-protein cysteine	48.82	170	82	2	1:504	1:167	1e-40	157
OKIT_1646	orf01809_AWRIB616_contig1_group1_1603043_1602756_len=288	fig|336988.4.peg.1650	SSU ribosomal protein S16p			1603043	1602756	288	YP_810389.1	SSU ribosomal protein S16P	87.37	95	12	0	1:285	1:95	2e-45	172
OKIT_1647	orf01810_AWRIB616_contig1_group1_1603985_1603125_len=861	fig|336988.4.peg.1651	hypothetical protein			1603985	1603125	861	YP_810388.1	hypothetical protein	43.52	301	149	4	16:858	3:302	5e-59	219
OKIT_1648	orf01812_AWRIB616_contig1_group1_1604050_1604640_len=591	fig|336988.4.peg.1652	Type II secretory pathway2C prepilin signal peptidase PulO			1604050	1604640	591	No_hit
OKIT_1649	orf01813_AWRIB616_contig1_group1_1605017_1604637_len=381	fig|336988.4.peg.1653	DNA-directed RNA polymerase beta subunit (EC 2.7.7.6);Ontology_term=KEGG_ENZYME:2.7.7.6			1605017	1604637	381	YP_810386.1	hypothetical protein	58.40	125	52	0	1:375	1:125	4e-44	168
OKIT_1650	orf01814_AWRIB616_contig1_group1_1606305_1605010_len=1296	fig|336988.4.peg.1654	Nucleotidyltransferase/DNA polymerase for DNA repair			1606305	1605010	1296	YP_810385.1	nucleotidyltransferase/DNA polymerase for DNA	73.81	420	110	0	34:1293	1:420	0.0	649
OKIT_1651	orf01815_AWRIB616_contig1_group1_1607244_1606390_len=855	fig|336988.4.peg.1655	transcriptional regulator2C helix-turn-helix XRE-family			1607244	1606390	855	YP_810384.1	XRE family transcriptional regulator	45.39	282	150	3	4:846	3:281	3e-64	237
OKIT_1652	orf01816_AWRIB616_contig1_group1_1608570_1607380_len=1191	fig|336988.4.peg.1656	Translation elongation factor Tu			1608570	1607380	1191	YP_810383.1	elongation factor Tu	97.47	396	10	0	1:1188	1:396	0.0	779
OKIT_1653	orf01818_AWRIB616_contig1_group1_1609373_1608729_len=645	fig|336988.4.peg.1657	Thiamin pyrophosphokinase (EC 2.7.6.2);Ontology_term=KEGG_ENZYME:2.7.6.2			1609373	1608729	645	YP_810382.1	thiamine pyrophosphokinase	56.54	214	93	0	1:642	7:220	8e-69	251
OKIT_1654	orf01819_AWRIB616_contig1_group1_1610049_1609378_len=672	fig|336988.4.peg.1658	Ribulose-phosphate 3-epimerase (EC 5.1.3.1);Ontology_term=KEGG_ENZYME:5.1.3.1			1610049	1609378	672	YP_810381.1	ribulose-5-phosphate 3-epimerase	85.20	223	33	0	1:669	1:223	5e-110	389
OKIT_1655	orf01820_AWRIB616_contig1_group1_1612040_1610094_len=1947	fig|336988.4.peg.1659	Serine/threonine protein kinase PrkC2C regulator of stationary phase			1612040	1610094	1947	YP_810380.1	serine/threonine kinase protein	72.27	649	140	3	1:1944	1:610	0.0	910
OKIT_1656	orf01821_AWRIB616_contig1_group1_1612783_1612040_len=744	fig|336988.4.peg.1660	Protein serine/threonine phosphatase PrpC2C regulation of stationary phase			1612783	1612040	744	YP_810379.1	Serine/threonine protein phosphatase	83.74	246	40	0	1:738	1:246	2e-118	417
OKIT_1657	orf01822_AWRIB616_contig1_group1_1613760_1612810_len=951	fig|336988.4.peg.1661	Methionyl-tRNA formyltransferase (EC 2.1.2.9);Ontology_term=KEGG_ENZYME:2.1.2.9			1613760	1612810	951	YP_810378.1	methionyl-tRNA formyltransferase	63.92	316	114	0	1:948	1:316	5e-116	409
OKIT_1658	orf01823_AWRIB616_contig1_group1_1616171_1613760_len=2412	fig|336988.4.peg.1662	Helicase PriA essential for oriC/DnaA-independent DNA replication			1616171	1613760	2412	YP_810377.1	replication restart DNA helicase PriA	73.85	803	210	0	1:2409	1:803	0.0	1218
OKIT_1659	orf01824_AWRIB616_contig1_group1_1617508_1616168_len=1341	fig|336988.4.peg.1663	5-nucleotidase family protein in cluster with NagD-like phosphatase			1617508	1616168	1341	YP_810376.1	5-nucleotidase/2,3-cyclic phosphodiesterase	70.56	445	130	1	1:1332	1:445	0.0	656
OKIT_1660	orf01826_AWRIB616_contig1_group1_1618125_1617511_len=615	fig|336988.4.peg.1664	phosphoesterase (putative)			1618125	1617511	615	YP_810375.1	phosphoesterase or phosphohydrolase	73.89	203	53	0	1:609	1:203	3e-92	329
OKIT_1661	orf01827_AWRIB616_contig1_group1_1618237_1619535_len=1299	fig|336988.4.peg.1665	Xanthine/uracil/thiamine/ascorbate permease family protein			1618237	1619535	1299	YP_810374.1	xanthine/uracil/vitamin C permease	89.79	431	44	0	1:1293	1:431	0.0	769
OKIT_1662	orf01828_AWRIB616_contig1_group1_1619670_1620629_len=960	fig|336988.4.peg.1666	Thymidylate synthase (EC 2.1.1.45);Ontology_term=KEGG_ENZYME:2.1.1.45			1619670	1620629	960	YP_810373.1	thymidylate synthase	81.82	319	58	0	1:957	1:319	2e-160	556
OKIT_1663	tRNA	fig|336988.4.rna.27	tRNA-Gly-CCC			1620654	1620725
OKIT_1664	orf01829_AWRIB616_contig1_group1_1620756_1621637_len=882	fig|336988.4.peg.1667	hypothetical protein BH3604			1620756	1621637	882	YP_810372.1	tRNA-Gly	82.59	293	51	0	1:879	1:293	2e-140	490
OKIT_1665	orf01830_AWRIB616_contig1_group1_1622168_1621620_len=549	fig|336988.4.peg.1668	5-formyltetrahydrofolate cyclo-ligase (EC 6.3.3.2);Ontology_term=KEGG_ENZYME:6.3.3.2			1622168	1621620	549	YP_810371.1	5-formyltetrahydrofolate cyclo-ligase	63.74	182	66	0	1:546	1:182	2e-67	246
OKIT_1666	orf01831_AWRIB616_contig1_group1_1623418_1622174_len=1245	fig|336988.4.peg.1669	Serine hydroxymethyltransferase (EC 2.1.2.1);Ontology_term=KEGG_ENZYME:2.1.2.1			1623418	1622174	1245	YP_810370.1	serine hydroxymethyltransferase	88.65	414	47	0	1:1242	1:414	0.0	736
OKIT_1667	orf01832_AWRIB616_contig1_group1_1624672_1623488_len=1185	fig|336988.4.peg.1670	N-acetyl-L2CL-diaminopimelate aminotransferase (EC 2.6.1.-);Ontology_term=KEGG_ENZYME:2.6.1.-			1624672	1623488	1185	YP_810369.1	aromatic amino acid aminotransferase	83.08	390	66	0	1:1170	1:390	0.0	652
OKIT_1668	orf01833_AWRIB616_contig1_group1_1625772_1624672_len=1101	fig|336988.4.peg.1671	Aspartate-semialdehyde dehydrogenase (EC 1.2.1.11);Ontology_term=KEGG_ENZYME:1.2.1.11			1625772	1624672	1101	YP_810368.1	aspartate semialdehyde dehydrogenase	80.05	366	73	0	1:1098	1:366	2e-171	593
OKIT_1669	orf01834_AWRIB616_contig1_group1_1626543_1625773_len=771	fig|336988.4.peg.1672	Dihydrodipicolinate reductase (EC 1.3.1.26);Ontology_term=KEGG_ENZYME:1.3.1.26			1626543	1625773	771	YP_810367.1	dihydrodipicolinate reductase	62.11	256	93	3	1:768	1:252	8e-85	305
OKIT_1670	orf01836_AWRIB616_contig1_group1_1627418_1626540_len=879	fig|336988.4.peg.1673	Dihydrodipicolinate synthase (EC 4.2.1.52);Ontology_term=KEGG_ENZYME:4.2.1.52			1627418	1626540	879	YP_810366.1	dihydrodipicolinate synthase	77.66	291	65	0	1:873	1:291	7e-134	468
OKIT_1671	orf01837_AWRIB616_contig1_group1_1628563_1627415_len=1149	fig|336988.4.peg.1674	N-acetyl-L2CL-diaminopimelate deacetylase (EC 3.5.1.47);Ontology_term=KEGG_ENZYME:3.5.1.47			1628563	1627415	1149	YP_810365.1	metal-dependent	82.72	382	66	0	1:1146	1:382	0.0	656
OKIT_1672	orf01838_AWRIB616_contig1_group1_1629264_1628563_len=702	fig|336988.4.peg.1675	22C32C42C5-tetrahydropyridine-22C6-dicarboxylate N-acetyltransferase (EC 2.3.1.89);Ontology_term=KEGG_ENZYME:2.3.1.89			1629264	1628563	702	YP_810364.1	2,3,4,5-tetrahydropyridine-2,6-dicarboxylate	75.97	233	56	0	1:699	1:233	8e-100	355
OKIT_1673	orf01839_AWRIB616_contig1_group1_1630540_1629257_len=1284	fig|336988.4.peg.1676	Diaminopimelate decarboxylase (EC 4.1.1.20);Ontology_term=KEGG_ENZYME:4.1.1.20			1630540	1629257	1284	YP_810363.1	diaminopimelate decarboxylase	77.52	427	96	0	1:1281	1:427	0.0	682
OKIT_1674	orf01840_AWRIB616_contig1_group1_1630890_1631072_len=183	fig|336988.4.peg.1677	LSU ribosomal protein L32p			1630890	1631072	183	YP_810362.1	50S ribosomal protein L32P	93.33	60	4	0	1:180	1:60	1e-28	116
OKIT_1675	orf01841_AWRIB616_contig1_group1_1632807_1631146_len=1662	fig|336988.4.peg.1678	Formate--tetrahydrofolate ligase (EC 6.3.4.3);Ontology_term=KEGG_ENZYME:6.3.4.3			1632807	1631146	1662	YP_810361.1	formate-tetrahydrofolate ligase	84.99	553	83	0	1:1659	1:553	0.0	939
OKIT_1676	orf01842_AWRIB616_contig1_group1_1633610_1632888_len=723	fig|336988.4.peg.1679	FIG000859: hypothetical protein			1633610	1632888	723	YP_810360.1	hypothetical protein	91.25	240	21	0	1:720	1:240	6e-128	448
OKIT_1677	orf01843_AWRIB616_contig1_group1_1634549_1633710_len=840	fig|336988.4.peg.1680	Hypothetical membrane spanning protein			1634549	1633710	840	YP_810372.1	tRNA-Gly	23.25	271	203	3	16:816	9:278	1e-21	95.5
OKIT_1678	orf01845_AWRIB616_contig1_group1_1636307_1634604_len=1704	fig|336988.4.peg.1681	ABC transporter ATP-binding/membrane spanning protein - multidrug resistance			1636307	1634604	1704	YP_811223.1	ABC-type multidrug transport system, ATPase and	24.49	539	327	19	196:1659	28:537	7e-27	114
OKIT_1679	orf01846_AWRIB616_contig1_group1_1638136_1636454_len=1683	fig|336988.4.peg.1683	Oligo-12C6-glucosidase (EC 3.2.1.10);Ontology_term=KEGG_ENZYME:3.2.1.10			1638136	1636454	1683	YP_809709.1	glucosidase	66.79	560	182	2	1:1680	1:556	0.0	811
OKIT_1680	orf01847_AWRIB616_contig1_group1_1638316_1638798_len=483	fig|336988.4.peg.1684	Acetyltransferase2C GNAT family			1638316	1638798	483	No_hit
OKIT_1681	orf01849_AWRIB616_contig1_group1_1638847_1640070_len=1224	fig|336988.4.peg.1685	permease of the major facilitator superfamily			1638847	1640070	1224	No_hit
OKIT_1682	orf01851_AWRIB616_contig1_group1_1640703_1640092_len=612	fig|336988.4.peg.1686	Aggregation promoting factor			1640703	1640092	612	YP_811339.1	aggregation promoting factor-like surface	62.56	203	73	2	1:609	1:200	6e-69	252
OKIT_1683	orf01852_AWRIB616_contig1_group1_1640976_1641449_len=474	fig|336988.4.peg.1687	Hypothetical protein2C ydbS homolog			1640976	1641449	474	YP_811086.1	hypothetical protein	57.14	154	66	0	1:462	1:154	5e-48	182
OKIT_1684	orf01853_AWRIB616_contig1_group1_1641439_1642896_len=1458	fig|336988.4.peg.1688	Hypothetical protein2C ydbT homolog			1641439	1642896	1458	No_hit
OKIT_1685	orf01854_AWRIB616_contig1_group1_1643851_1642883_len=969	fig|336988.4.peg.1689	Muramoyltetrapeptide carboxypeptidase (EC 3.4.17.13);Ontology_term=KEGG_ENZYME:3.4.17.13			1643851	1642883	969	YP_810091.1	microcin C7 immunity protein	67.61	318	103	0	13:966	4:321	5e-125	439
OKIT_1686	orf01855_AWRIB616_contig1_group1_1644122_1644781_len=660	fig|336988.4.peg.1690	Diadenosine tetraphosphatase and related serine/threonine protein phosphatases			1644122	1644781	660	YP_810462.1	diadenosine tetraphosphatase-like protein	40.09	217	130	0	4:654	62:278	1e-48	184
OKIT_1687	orf01856_AWRIB616_contig1_group1_1644917_1646101_len=1185	fig|336988.4.peg.1692	multidrug resistance protein2C putative			1644917	1646101	1185	YP_809827.1	major facilitator superfamily permease	43.81	388	217	1	16:1176	16:403	7e-94	336
OKIT_1688	orf01857_AWRIB616_contig1_group1_1646917_1646114_len=804	fig|336988.4.peg.1693	Tributyrin esterase			1646917	1646114	804	YP_810319.1	esterase	71.54	267	76	0	1:801	1:267	1e-119	421
OKIT_1689	orf01858_AWRIB616_contig1_group1_1648013_1646925_len=1089	fig|336988.4.peg.1694	Histidinol-phosphate aminotransferase (EC 2.6.1.9);Ontology_term=KEGG_ENZYME:2.6.1.9			1648013	1646925	1089	No_hit
OKIT_1690	orf01859_AWRIB616_contig1_group1_1648349_1648029_len=321	fig|336988.4.peg.1695	Phosphoribosyl-ATP pyrophosphatase (EC 3.6.1.31);Ontology_term=KEGG_ENZYME:3.6.1.31			1648349	1648029	321	No_hit
OKIT_1691	orf01860_AWRIB616_contig1_group1_1648671_1648333_len=339	fig|336988.4.peg.1696	phosphoribosyl-AMP cyclohydrolase( EC:3.5.4.19 );Ontology_term=KEGG_ENZYME:3.5.4.19			1648671	1648333	339	No_hit
OKIT_1692	orf01861_AWRIB616_contig1_group1_1649429_1648668_len=762	fig|336988.4.peg.1697	Imidazole glycerol phosphate synthase cyclase subunit (EC 4.1.3.-);Ontology_term=KEGG_ENZYME:4.1.3.-			1649429	1648668	762	No_hit
OKIT_1693	orf01862_AWRIB616_contig1_group1_1650144_1649419_len=726	fig|336988.4.peg.1698	Phosphoribosylformimino-5-aminoimidazole carboxamide ribotide isomerase (EC 5.3.1.16);Ontology_term=KEGG_ENZYME:5.3.1.16			1650144	1649419	726	No_hit
OKIT_1694	orf01863_AWRIB616_contig1_group1_1650752_1650144_len=609	fig|336988.4.peg.1699	Imidazole glycerol phosphate synthase amidotransferase subunit (EC 2.4.2.-);Ontology_term=KEGG_ENZYME:2.4.2.-			1650752	1650144	609	No_hit
OKIT_1695	orf01864_AWRIB616_contig1_group1_1651337_1650753_len=585	fig|336988.4.peg.1700	Imidazoleglycerol-phosphate dehydratase (EC 4.2.1.19);Ontology_term=KEGG_ENZYME:4.2.1.19			1651337	1650753	585	No_hit
OKIT_1696	orf01866_AWRIB616_contig1_group1_1652622_1651324_len=1299	fig|336988.4.peg.1701	Histidinol dehydrogenase (EC 1.1.1.23);Ontology_term=KEGG_ENZYME:1.1.1.23			1652622	1651324	1299	No_hit
OKIT_1697	orf01867_AWRIB616_contig1_group1_1653275_1652619_len=657	fig|336988.4.peg.1702	ATP phosphoribosyltransferase catalytic subunit (EC 2.4.2.17);Ontology_term=KEGG_ENZYME:2.4.2.17			1653275	1652619	657	No_hit
OKIT_1698	orf01868_AWRIB616_contig1_group1_1654422_1653250_len=1173	fig|336988.4.peg.1703	ATP phosphoribosyltransferase regulatory subunit (EC 2.4.2.17);Ontology_term=KEGG_ENZYME:2.4.2.17			1654422	1653250	1173	No_hit
OKIT_1699	orf01869_AWRIB616_contig1_group1_1655598_1654768_len=831	fig|336988.4.peg.1704	Histidinol-phosphatase (EC 3.1.3.15);Ontology_term=KEGG_ENZYME:3.1.3.15			1655598	1654768	831	No_hit
OKIT_1700	orf01870_AWRIB616_contig1_group1_1655675_1656115_len=441	fig|336988.4.peg.1705	hypothetical protein			1655675	1656115	441	No_hit
OKIT_1701	orf01871_AWRIB616_contig1_group1_1656794_1656108_len=687	fig|336988.4.peg.1706	YjeF protein2C function unknown			1656794	1656108	687	YP_809814.1	hypothetical protein	62.74	212	77	1	31:666	1:210	2e-72	263
OKIT_1702	orf01872_AWRIB616_contig1_group1_1657516_1656833_len=684	fig|336988.4.peg.1707	hypothetical protein			1657516	1656833	684	No_hit
OKIT_1703	orf01873_AWRIB616_contig1_group1_1658441_1657623_len=819	fig|336988.4.peg.1708	2-oxo-hepta-3-ene-12C7-dioate hydratase			1658441	1657623	819	No_hit
OKIT_1704	orf01874_AWRIB616_contig1_group1_1659208_1659948_len=741	fig|336988.4.peg.1711	D-alanyl-D-alanine dipeptidase			1659208	1659948	741	YP_809866.1	D-alanyl-D-alanine dipeptidase	60.17	236	92	1	37:738	9:244	6e-85	305
OKIT_1705	orf01875_AWRIB616_contig1_group1_1661300_1659945_len=1356	fig|336988.4.peg.1712	Integral membrane protein			1661300	1659945	1356	YP_810453.1	hypothetical protein	81.11	413	78	0	115:1353	3:415	0.0	666
OKIT_1706	orf01877_AWRIB616_contig1_group1_1661517_1661927_len=411	fig|336988.4.peg.1713	hypothetical protein			1661517	1661927	411	YP_810328.1	hypothetical protein	49.25	134	68	0	1:402	1:134	6e-36	141
OKIT_1707	orf01878_AWRIB616_contig1_group1_1662699_1661932_len=768	fig|336988.4.peg.1714	Nudix-related transcriptional regulator NrtR			1662699	1661932	768	No_hit
OKIT_1708	orf01879_AWRIB616_contig1_group1_1662806_1664077_len=1272	fig|336988.4.peg.1715	FIG00886308: hypothetical protein			1662806	1664077	1272	YP_810339.1	hypothetical protein	75.68	407	99	0	40:1260	1:407	0.0	641
OKIT_1709	orf01880_AWRIB616_contig1_group1_1665085_1664084_len=1002	fig|336988.4.peg.1716	Transcriptional regulator2C LacI family			1665085	1664084	1002	YP_811182.1	LacI family transcription regulator	31.34	335	221	5	4:996	5:334	2e-44	172
OKIT_1710	orf01881_AWRIB616_contig1_group1_1666711_1665179_len=1533	fig|336988.4.peg.1717	Gluconokinase (EC 2.7.1.12);Ontology_term=KEGG_ENZYME:2.7.1.12			1666711	1665179	1533	YP_810947.1	gluconate kinase	61.10	509	197	1	1:1524	1:509	0.0	628
OKIT_1711	orf01882_AWRIB616_contig1_group1_1668070_1666736_len=1335	fig|336988.4.peg.1718	Gluconate permease2C Bsu4004 homolog			1668070	1666736	1335	YP_810946.1	H+/gluconate symporter or related permease	49.04	469	210	2	4:1323	27:495	7e-130	456
OKIT_1712	orf01883_AWRIB616_contig1_group1_1668868_1668095_len=774	fig|336988.4.peg.1719	2-deoxy-D-gluconate 3-dehydrogenase (EC 1.1.1.125);Ontology_term=KEGG_ENZYME:1.1.1.125			1668868	1668095	774	YP_811185.1	Short-chain alcohol dehydrogenase	62.55	251	94	0	19:771	10:260	7e-94	335
OKIT_1713	orf01884_AWRIB616_contig1_group1_1669084_1669350_len=267	fig|336988.4.peg.1720	hypothetical protein			1669084	1669350	267	No_hit
OKIT_1714	orf01885_AWRIB616_contig1_group1_1669457_1670305_len=849	fig|336988.4.peg.1721	Glycosyl transferase2C family 8			1669457	1670305	849	No_hit
OKIT_1715	orf01886_AWRIB616_contig1_group1_1670811_1670314_len=498	fig|336988.4.peg.1722	acetyltransferase2C GNAT family			1670811	1670314	498	No_hit
OKIT_1716	orf01887_AWRIB616_contig1_group1_1671297_1670848_len=450	fig|336988.4.peg.1723	Acetyltransferase2C GNAT family			1671297	1670848	450	YP_810881.1	acetyltransferase	56.03	141	62	0	13:435	4:144	5e-42	162
OKIT_1717	orf01888_AWRIB616_contig1_group1_1671931_1671314_len=618	fig|336988.4.peg.1724	galactoside O-acetyltransferase			1671931	1671314	618	No_hit
OKIT_1718	orf01889_AWRIB616_contig1_group1_1672059_1672619_len=561	fig|336988.4.peg.1725	hypothetical protein			1672059	1672619	561	No_hit
OKIT_1719	orf01890_AWRIB616_contig1_group1_1672717_1673115_len=399	fig|336988.4.peg.1726	Putative uncharacterized protein			1672717	1673115	399	No_hit
OKIT_1720	orf01892_AWRIB616_contig1_group1_1673673_1673170_len=504	fig|336988.4.peg.1727	Spermidine N1-acetyltransferase (EC 2.3.1.57);Ontology_term=KEGG_ENZYME:2.3.1.57			1673673	1673170	504	YP_810316.1	acetyltransferase	77.11	166	38	0	1:498	1:166	5e-79	285
OKIT_1721	orf01893_AWRIB616_contig1_group1_1674681_1673743_len=939	fig|336988.4.peg.1728	sensor protein kinase			1674681	1673743	939	No_hit
OKIT_1722	orf01894_AWRIB616_contig1_group1_1675318_1674668_len=651	fig|336988.4.peg.1729	DNA-binding response regulator			1675318	1674668	651	YP_809765.1	DNA-binding response regulator	32.91	234	135	6	1:645	1:231	4e-27	113
OKIT_1723	orf01895_AWRIB616_contig1_group1_1677420_1675417_len=2004	fig|336988.4.peg.1730	ABC transporter permease protein			1677420	1675417	2004	No_hit
OKIT_1724	orf01897_AWRIB616_contig1_group1_1678159_1678314_len=156	fig|336988.4.peg.1732	hypothetical protein	Putative bacteriocin (BAGEL)	Bacteriocin	1678159	1678314	156	No_hit
OKIT_1725	orf01896_AWRIB616_contig1_group1_1678179_1677421_len=759	fig|336988.4.peg.1731	ABC transporter ATP-binding protein			1678179	1677421	759	YP_810096.1	peptide ABC transporter ATPase	40.18	219	130	1	7:663	4:221	4e-44	170
OKIT_1726	orf01898_AWRIB616_contig1_group1_1679953_1678295_len=1659	fig|336988.4.peg.1733	hypothetical protein			1679953	1678295	1659	No_hit
OKIT_1727	tRNA	fig|336988.4.rna.28	tRNA-Glu-TTC			1680264	1680190
OKIT_1728	orf01899_AWRIB616_contig1_group1_1681618_1680323_len=1296	fig|336988.4.peg.1734	MDR-type permease			1681618	1680323	1296	No_hit
OKIT_1729	orf01900_AWRIB616_contig1_group1_1682891_1681587_len=1305	fig|336988.4.peg.1735	Alkaline phosphodiesterase I (EC 3.1.4.1) / Nucleotide pyrophosphatase (EC 3.6.1.9);Ontology_term=KEGG_ENZYME:3.1.4.1,KEGG_ENZYME:3.6.1.9			1682891	1681587	1305	YP_810297.1	tRNA-Glu	76.21	433	103	0	1:1299	1:433	0.0	706
OKIT_1730	orf01902_AWRIB616_contig1_group1_1683518_1682952_len=567	fig|336988.4.peg.1736	Peptidoglycan binding protein2C LysM domain			1683518	1682952	567	YP_810296.1	aggregation promoting factor-like surface	49.09	165	61	5	121:564	6:164	5e-37	145
OKIT_1731	orf01903_AWRIB616_contig1_group1_1683927_1684907_len=981	fig|336988.4.peg.1737	Transcription regulator [contains diacylglycerol kinase catalytic domain]			1683927	1684907	981	No_hit
OKIT_1732	orf01904_AWRIB616_contig1_group1_1685768_1684938_len=831	fig|336988.4.peg.1738	oxidoreductase of aldo/keto reductase family2C subgroup 1			1685768	1684938	831	YP_809738.1	aldo/keto reductase related protein	55.11	274	123	0	7:828	9:282	6e-92	329
OKIT_1733	orf01905_AWRIB616_contig1_group1_1686456_1685848_len=609	fig|336988.4.peg.1739	Nitroreductase family protein			1686456	1685848	609	No_hit
OKIT_1734	orf01906_AWRIB616_contig1_group1_1686620_1687060_len=441	fig|336988.4.peg.1740	Rrf2 family transcriptional regulator2C group III			1686620	1687060	441	YP_810295.1	BadM/Rrf2 family transcriptional regulator	59.86	147	57	2	1:438	1:146	3e-42	162
OKIT_1735	orf01907_AWRIB616_contig1_group1_1687169_1687948_len=780	fig|336988.4.peg.1741	22C3-butanediol dehydrogenase2C S-alcohol forming2C (R)-acetoin-specific (EC 1.1.1.4) / Acetoin (diacetyl) reductase (EC 1.1.1.5);Ontology_term=KEGG_ENZYME:1.1.1.4,KEGG_ENZYME:1.1.1.5			1687169	1687948	780	YP_810294.1	acetoin reductase	81.85	259	47	0	1:777	1:259	6e-125	438
OKIT_1736	orf01909_AWRIB616_contig1_group1_1688050_1688541_len=492	fig|336988.4.peg.1743	Acetyltransferase2C GNAT family			1688050	1688541	492	No_hit
OKIT_1737	orf01910_AWRIB616_contig1_group1_1688902_1689123_len=222	fig|336988.4.peg.1744	hypothetical protein			1688902	1689123	222	No_hit
OKIT_1738	orf01911_AWRIB616_contig1_group1_1689255_1689569_len=315	fig|336988.4.peg.1745	Small conserved membrane protein			1689255	1689569	315	No_hit
OKIT_1739	orf01912_AWRIB616_contig1_group1_1690404_1689727_len=678	fig|336988.4.peg.1746	conserved hypothetical protein2C putative F420-dependent NADP reductase			1690404	1689727	678	YP_809893.1	dinucleotide-binding protein	29.76	205	142	1	10:618	2:206	2e-22	97.8
OKIT_1740	orf01913_AWRIB616_contig1_group1_1691450_1690404_len=1047	fig|336988.4.peg.1747	Coenzyme F420-dependent N52CN10-methylene tetrahydromethanopterin reductase related flavin-dependent oxidoreductase			1691450	1690404	1047	No_hit
OKIT_1741	tRNA	fig|336988.4.rna.29	tRNA-Lys-TTT			1691780	1691704
OKIT_1742	orf01914_AWRIB616_contig1_group1_1692823_1691840_len=984	fig|336988.4.peg.1748	Catabolite control protein A			1692823	1691840	984	YP_810286.1	tRNA-Lys	76.76	327	75	1	1:978	1:327	3e-143	499
OKIT_1743	orf01915_AWRIB616_contig1_group1_1693476_1692940_len=537	fig|336988.4.peg.1749	FIG00886007: hypothetical protein			1693476	1692940	537	YP_810285.1	hypothetical protein	69.94	173	39	2	1:519	1:160	5e-64	235
OKIT_1744	orf01917_AWRIB616_contig1_group1_1693899_1693480_len=420	fig|336988.4.peg.1750	FIG00885731: hypothetical protein			1693899	1693480	420	YP_810284.1	methyl-accepting chemotaxis-like protein	80.43	138	27	0	1:414	1:138	2e-57	213
OKIT_1745	orf01918_AWRIB616_contig1_group1_1694475_1693945_len=531	fig|336988.4.peg.1751	FIG009886: phosphoesterase			1694475	1693945	531	YP_810283.1	phosphoesterase	55.37	177	78	1	1:528	1:177	1e-57	214
OKIT_1746	orf01919_AWRIB616_contig1_group1_1695317_1694472_len=846	fig|336988.4.peg.1752	Glutamate racemase (EC 5.1.1.3);Ontology_term=KEGG_ENZYME:5.1.1.3			1695317	1694472	846	YP_810282.1	glutamate racemase	66.90	281	93	0	1:843	1:281	3e-109	386
OKIT_1747	orf01920_AWRIB616_contig1_group1_1695381_1695806_len=426	fig|336988.4.peg.1753	FIG00885921: hypothetical protein			1695381	1695806	426	YP_810281.1	hydrocarbon binding protein	82.98	141	24	0	1:423	1:141	5e-67	244
OKIT_1748	orf01921_AWRIB616_contig1_group1_1696622_1695819_len=804	fig|336988.4.peg.1754	Helicase loader DnaI			1696622	1695819	804	YP_810280.1	replicative DNA helicase loader DnaI	68.16	267	85	0	1:801	1:267	3e-104	370
OKIT_1749	orf01923_AWRIB616_contig1_group1_1697887_1696619_len=1269	fig|336988.4.peg.1755	Helicase loader DnaB			1697887	1696619	1269	YP_810279.1	replicative DNA helicase loader DnaB	57.68	423	169	5	1:1263	1:415	6e-128	449
OKIT_1750	orf01924_AWRIB616_contig1_group1_1698507_1697884_len=624	fig|336988.4.peg.1756	Dephospho-CoA kinase (EC 2.7.1.24);Ontology_term=KEGG_ENZYME:2.7.1.24			1698507	1697884	624	YP_810278.1	dephospho-CoA kinase	70.44	203	60	0	10:618	1:203	2e-81	293
OKIT_1751	orf01925_AWRIB616_contig1_group1_1699310_1698486_len=825	fig|336988.4.peg.1757	Formamidopyrimidine-DNA glycosylase (EC 3.2.2.23);Ontology_term=KEGG_ENZYME:3.2.2.23			1699310	1698486	825	YP_810277.1	formamidopyrimidine-DNA glycosylase /	71.17	274	79	0	1:822	1:274	6e-115	405
OKIT_1752	orf01926_AWRIB616_contig1_group1_1699836_1699303_len=534	fig|336988.4.peg.1758	Putative Nudix hydrolase YfcD (EC 3.6.-.-);Ontology_term=KEGG_ENZYME:3.6.-.-			1699836	1699303	534	YP_810276.1	NUDIX family hydrolase	62.15	177	67	0	1:531	1:177	1e-65	241
OKIT_1753	orf01927_AWRIB616_contig1_group1_1702513_1699823_len=2691	fig|336988.4.peg.1759	DNA polymerase I (EC 2.7.7.7);Ontology_term=KEGG_ENZYME:2.7.7.7			1702513	1699823	2691	YP_810275.1	DNA polymerase I	81.47	896	165	1	1:2688	9:903	0.0	1471
OKIT_1754	orf01928_AWRIB616_contig1_group1_1703733_1702600_len=1134	fig|336988.4.peg.1760	D-alanine--D-alanine ligase (EC 6.3.2.4);Ontology_term=KEGG_ENZYME:6.3.2.4			1703733	1702600	1134	YP_810274.1	D-alanine--D-alanine ligase	76.39	377	89	0	1:1131	1:377	4e-174	602
OKIT_1755	orf01929_AWRIB616_contig1_group1_1704793_1703816_len=978	fig|336988.4.peg.1761	FIG00885702: hypothetical protein			1704793	1703816	978	YP_810273.1	hypothetical protein	86.15	325	45	0	1:975	1:325	1e-162	564
OKIT_1756	orf01930_AWRIB616_contig1_group1_1706013_1704790_len=1224	fig|336988.4.peg.1762	cell division membrane protein			1706013	1704790	1224	YP_810272.1	cell division membrane protein	83.29	407	68	0	1:1221	1:407	0.0	682
OKIT_1757	orf01931_AWRIB616_contig1_group1_1706233_1706021_len=213	fig|336988.4.peg.1763	FIG00886330: hypothetical protein			1706233	1706021	213	YP_810271.1	hypothetical protein	80.00	70	14	0	1:210	1:70	5e-28	114
OKIT_1758	orf01932_AWRIB616_contig1_group1_1707366_1706242_len=1125	fig|336988.4.peg.1764	Rod shape-determining protein MreB			1707366	1706242	1125	YP_810270.1	Actin-like ATPase for cell morphogenesis	95.17	373	18	0	1:1119	1:373	0.0	698
OKIT_1759	orf01933_AWRIB616_contig1_group1_1707696_1707403_len=294	fig|336988.4.peg.1765	FIG00886001: hypothetical protein			1707696	1707403	294	YP_810269.1	hypothetical protein	77.78	72	16	0	73:288	1:72	3e-30	121
OKIT_1760	orf01934_AWRIB616_contig1_group1_1708105_1707677_len=429	fig|336988.4.peg.1766	ATP synthase epsilon chain (EC 3.6.3.14);Ontology_term=KEGG_ENZYME:3.6.3.14			1708105	1707677	429	YP_810268.1	F0F1-type ATP synthase, epsilon subunit	80.99	142	27	0	1:426	1:142	2e-60	223
OKIT_1761	orf01935_AWRIB616_contig1_group1_1709641_1708109_len=1533	fig|336988.4.peg.1767	ATP synthase beta chain (EC 3.6.3.14);Ontology_term=KEGG_ENZYME:3.6.3.14			1709641	1708109	1533	YP_810267.1	F0F1 ATP synthase subunit beta	88.63	510	52	2	1:1530	1:504	0.0	881
OKIT_1762	orf01936_AWRIB616_contig1_group1_1710571_1709660_len=912	fig|336988.4.peg.1768	ATP synthase gamma chain (EC 3.6.3.14);Ontology_term=KEGG_ENZYME:3.6.3.14			1710571	1709660	912	YP_810266.1	F0F1-type ATP synthase, gamma subunit	82.84	303	52	0	1:909	1:303	2e-143	500
OKIT_1763	orf01938_AWRIB616_contig1_group1_1712133_1710571_len=1563	fig|336988.4.peg.1769	ATP synthase alpha chain (EC 3.6.3.14);Ontology_term=KEGG_ENZYME:3.6.3.14			1712133	1710571	1563	YP_810265.1	F0F1 ATP synthase subunit alpha	92.66	518	38	0	1:1554	1:518	0.0	944
OKIT_1764	orf01939_AWRIB616_contig1_group1_1712688_1712134_len=555	fig|336988.4.peg.1770	ATP synthase delta chain (EC 3.6.3.14);Ontology_term=KEGG_ENZYME:3.6.3.14			1712688	1712134	555	YP_810264.1	F0F1-type ATP synthase, delta subunit	69.40	183	56	0	1:549	1:183	7e-68	248
OKIT_1765	orf01940_AWRIB616_contig1_group1_1713218_1712688_len=531	fig|336988.4.peg.1771	ATP synthase B chain (EC 3.6.3.14);Ontology_term=KEGG_ENZYME:3.6.3.14			1713218	1712688	531	YP_810263.1	F0F1-type ATP synthase, subunit b	77.71	175	39	0	1:525	1:175	1e-72	264
OKIT_1766	orf01941_AWRIB616_contig1_group1_1713454_1713242_len=213	fig|336988.4.peg.1772	ATP synthase C chain (EC 3.6.3.14);Ontology_term=KEGG_ENZYME:3.6.3.14			1713454	1713242	213	YP_810262.1	F0F1-type ATP synthase, subunit c	92.75	69	5	0	1:207	1:69	1e-30	123
OKIT_1767	orf01942_AWRIB616_contig1_group1_1714210_1713485_len=726	fig|336988.4.peg.1773	ATP synthase A chain (EC 3.6.3.14);Ontology_term=KEGG_ENZYME:3.6.3.14			1714210	1713485	726	YP_810261.1	F0F1-type ATP synthase, subunit a	75.93	241	58	0	1:723	1:241	7e-107	378
OKIT_1768	orf01943_AWRIB616_contig1_group1_1714340_1715206_len=867	fig|336988.4.peg.1774	YjeF protein2C C-terminal domain			1714340	1715206	867	YP_810260.1	sugar kinase	61.75	285	109	0	1:855	1:285	4e-100	356
OKIT_1769	orf01944_AWRIB616_contig1_group1_1716479_1715178_len=1302	fig|336988.4.peg.1775	D-serine dehydratase (EC 4.3.1.18);Ontology_term=KEGG_ENZYME:4.3.1.18			1716479	1715178	1302	YP_810259.1	D-serine dehydratase	72.75	433	117	1	1:1299	41:472	0.0	641
OKIT_1770	rRNA	fig|336988.4.rna.30	Large Subunit Ribosomal RNA%3B lsuRNA%3B LSU rRNA			1719693	1716806
OKIT_1771	tRNA	fig|336988.4.rna.31	tRNA-Ala-TGC			1719978	1719906
OKIT_1772	rRNA	fig|336988.4.rna.32	Small Subunit Ribosomal RNA%3B ssuRNA%3B SSU rRNA			1721609	1720138
OKIT_1773	orf01946_AWRIB616_contig1_group1_1725716_1722045_len=3672	fig|336988.4.peg.1778	DNA-directed RNA polymerase beta subunit (EC 2.7.7.6);Ontology_term=KEGG_ENZYME:2.7.7.6			1725716	1722045	3672	YP_810901.1	DNA-directed RNA polymerase subunit beta	94.59	1219	66	0	1:3657	1:1219	0.0	2279
OKIT_1774	orf01948_AWRIB616_contig1_group1_1729321_1725728_len=3594	fig|336988.4.peg.1779	DNA-directed RNA polymerase beta subunit (EC 2.7.7.6);Ontology_term=KEGG_ENZYME:2.7.7.6			1729321	1725728	3594	YP_810902.1	DNA-directed RNA polymerase, beta subunit/140 kD	94.49	1197	66	0	1:3591	1:1197	0.0	2270
OKIT_1775	orf01949_AWRIB616_contig1_group1_1729741_1729538_len=204	fig|336988.4.peg.1780	Cold shock protein CspA			1729741	1729538	204	YP_810903.1	cold-shock DNA-binding protein family protein	97.01	67	2	0	1:201	1:67	6e-36	140
OKIT_1776	orf01951_AWRIB616_contig1_group1_1730836_1729892_len=945	fig|336988.4.peg.1781	hypothetical protein			1730836	1729892	945	YP_810904.1	hypothetical protein	47.78	316	162	2	1:939	1:316	3e-78	284
OKIT_1777	orf01952_AWRIB616_contig1_group1_1732371_1730839_len=1533	fig|336988.4.peg.1782	drug resistance transporter2C EmrB/QacA family			1732371	1730839	1533	YP_810905.1	major facilitator superfamily permease	76.18	508	121	0	1:1524	1:508	0.0	789
OKIT_1778	orf01953_AWRIB616_contig1_group1_1734282_1732435_len=1848	fig|336988.4.peg.1783	Lipid A export ATP-binding/permease protein MsbA			1734282	1732435	1848	YP_810906.1	ABC-type multidrug transport system, ATPase and	76.66	617	137	4	1:1842	1:613	0.0	926
OKIT_1779	orf01954_AWRIB616_contig1_group1_1736026_1734275_len=1752	fig|336988.4.peg.1784	Lipid A export ATP-binding/permease protein MsbA			1736026	1734275	1752	YP_810907.1	ABC-type multidrug transport system, ATPase and	72.73	583	159	0	1:1749	1:583	0.0	837
OKIT_1780	orf01955_AWRIB616_contig1_group1_1736732_1736067_len=666	fig|336988.4.peg.1785	COG1272: Predicted membrane protein hemolysin III homolog			1736732	1736067	666	YP_810908.1	hemolysin III-like protein	81.22	213	40	0	25:663	5:217	3e-108	382
OKIT_1781	orf01956_AWRIB616_contig1_group1_1737914_1736784_len=1131	fig|336988.4.peg.1786	RecA protein			1737914	1736784	1131	YP_810909.1	RecA protein	87.50	376	47	0	1:1128	1:376	0.0	656
OKIT_1782	orf01957_AWRIB616_contig1_group1_1738591_1738031_len=561	fig|336988.4.peg.1787	CDP-diacylglycerol--glycerol-3-phosphate 3-phosphatidyltransferase (EC 2.7.8.5);Ontology_term=KEGG_ENZYME:2.7.8.5			1738591	1738031	561	YP_810910.1	CDP-diacylglycerol--glycerol-3-phosphate	86.02	186	26	0	1:558	1:186	5e-91	325
OKIT_1783	orf01958_AWRIB616_contig1_group1_1739562_1738588_len=975	fig|336988.4.peg.1788	Transcriptional regulator in cluster with unspecified monosaccharide ABC transport system			1739562	1738588	975	YP_810911.1	Xre-like DNA-binding protein	57.45	329	130	4	1:972	1:324	2e-101	360
OKIT_1784	orf01959_AWRIB616_contig1_group1_1740860_1739583_len=1278	fig|336988.4.peg.1789	FIG009210: peptidase2C M16 family			1740860	1739583	1278	YP_810912.1	Zn-dependent peptidase	61.88	425	162	0	1:1275	1:425	2e-162	564
OKIT_1785	orf01960_AWRIB616_contig1_group1_1742103_1740850_len=1254	fig|336988.4.peg.1790	FIG001621: Zinc protease			1742103	1740850	1254	YP_810913.1	Zn-dependent peptidase	48.44	417	215	0	1:1251	1:417	6e-115	406
OKIT_1786	orf01961_AWRIB616_contig1_group1_1743542_1742109_len=1434	fig|336988.4.peg.1791	Cardiolipin synthetase (EC 2.7.8.-);Ontology_term=KEGG_ENZYME:2.7.8.-			1743542	1742109	1434	YP_810914.1	cardiolipin synthetase 2	80.92	477	91	0	1:1431	1:477	0.0	794
OKIT_1787	orf01962_AWRIB616_contig1_group1_1744092_1743547_len=546	fig|336988.4.peg.1792	Rod shape-determining protein MreD			1744092	1743547	546	YP_810915.1	rod shape-determining protein MreD	66.11	180	61	0	1:540	1:180	6e-73	265
OKIT_1788	orf01963_AWRIB616_contig1_group1_1744937_1744089_len=849	fig|336988.4.peg.1793	Rod shape-determining protein MreC			1744937	1744089	849	YP_810916.1	rod shape-determining protein MreC	77.22	281	64	0	1:843	1:281	2e-125	440
OKIT_1789	orf01964_AWRIB616_contig1_group1_1745972_1744968_len=1005	fig|336988.4.peg.1794	Rod shape-determining protein MreB			1745972	1744968	1005	YP_810917.1	Actin-like ATPase for cell morphogenesis	94.01	334	20	0	1:1002	1:334	3e-177	613
OKIT_1790	orf01965_AWRIB616_contig1_group1_1747231_1746020_len=1212	fig|336988.4.peg.1795	Dihydrofolate synthase (EC 6.3.2.12) / Folylpolyglutamate synthase (EC 6.3.2.17);Ontology_term=KEGG_ENZYME:6.3.2.12,KEGG_ENZYME:6.3.2.17			1747231	1746020	1212	YP_810918.1	folylpolyglutamate synthase	75.12	402	100	0	1:1206	1:402	0.0	625
OKIT_1791	orf01966_AWRIB616_contig1_group1_1749935_1747224_len=2712	fig|336988.4.peg.1796	Valyl-tRNA synthetase (EC 6.1.1.9);Ontology_term=KEGG_ENZYME:6.1.1.9			1749935	1747224	2712	YP_810919.1	valyl-tRNA synthetase	80.95	903	171	1	1:2709	1:902	0.0	1532
OKIT_1792	orf01967_AWRIB616_contig1_group1_1751894_1750290_len=1605	fig|336988.4.peg.1798	Septation ring formation regulator EzrA			1751894	1750290	1605	YP_810920.1	septation ring formation regulator EzrA	84.80	533	81	0	4:1602	35:567	0.0	908
OKIT_1793	orf01968_AWRIB616_contig1_group1_1752261_1752875_len=615	fig|336988.4.peg.1799	SSU ribosomal protein S4p (S9e)			1752261	1752875	615	YP_810921.1	SSU ribosomal protein S4P	89.71	204	21	0	1:612	59:262	1e-106	377
OKIT_1794	orf01970_AWRIB616_contig1_group1_1753720_1752965_len=756	fig|336988.4.peg.1800	Hypothetical integral membrane protein			1753720	1752965	756	YP_810922.1	nicotinamide mononucleotide transporter	86.23	247	34	0	7:747	4:250	1e-126	444
OKIT_1795	orf01971_AWRIB616_contig1_group1_1755450_1753819_len=1632	fig|336988.4.peg.1801	Heat shock protein 60 family chaperone GroEL			1755450	1753819	1632	YP_810923.1	chaperonin GroEL	93.19	543	35	2	1:1629	1:541	0.0	962
OKIT_1796	orf01972_AWRIB616_contig1_group1_1755729_1755454_len=276	fig|336988.4.peg.1802	Heat shock protein 60 family co-chaperone GroES			1755729	1755454	276	YP_810924.1	Co-chaperonin GroES (HSP10)	93.41	91	6	0	1:273	1:91	4e-45	171
OKIT_1797	orf01973_AWRIB616_contig1_group1_1756508_1755843_len=666	fig|336988.4.peg.1803	Redox-sensitive transcriptional regulator (AT-rich DNA-binding protein)			1756508	1755843	666	YP_810925.1	redox-sensing transcriptional repressor Rex	81.45	221	41	0	1:663	1:221	1e-100	357
OKIT_1798	orf01974_AWRIB616_contig1_group1_1757613_1756588_len=1026	fig|336988.4.peg.1804	YgjD/Kae1/Qri7 family2C required for threonylcarbamoyladenosine (t(6)A) formation in tRNA			1757613	1756588	1026	YP_810926.1	O-sialoglycoprotein endopeptidase	80.35	341	67	0	1:1023	1:341	3e-156	543
OKIT_1799	orf01975_AWRIB616_contig1_group1_1758125_1757610_len=516	fig|336988.4.peg.1805	Ribosomal-protein-S18p-alanine acetyltransferase (EC 2.3.1.-);Ontology_term=KEGG_ENZYME:2.3.1.-			1758125	1757610	516	YP_810927.1	acetyltransferase	71.60	169	48	0	1:507	1:169	4e-67	245
OKIT_1800	orf01976_AWRIB616_contig1_group1_1758843_1758109_len=735	fig|336988.4.peg.1806	Inactive homolog of metal-dependent proteases2C putative molecular chaperone			1758843	1758109	735	YP_810928.1	metal-dependent protease-like protein, putative	59.59	245	94	2	1:732	1:241	3e-77	280
OKIT_1801	orf01977_AWRIB616_contig1_group1_1759838_1758843_len=996	fig|336988.4.peg.1807	UDP-glucose 4-epimerase (EC 5.1.3.2);Ontology_term=KEGG_ENZYME:5.1.3.2			1759838	1758843	996	YP_810929.1	UDP-galactose 4-epimerase	90.33	331	32	0	1:993	1:331	2e-180	623
OKIT_1802	orf01978_AWRIB616_contig1_group1_1760631_1759891_len=741	fig|336988.4.peg.1808	Acyl-ACP thioesterase			1760631	1759891	741	YP_810930.1	Acyl-ACP thioesterase	67.35	245	80	0	1:735	1:245	4e-97	346
OKIT_1803	orf01979_AWRIB616_contig1_group1_1761485_1760631_len=855	fig|336988.4.peg.1809	rRNA small subunit methyltransferase I			1761485	1760631	855	YP_810931.1	methyltransferase	69.61	283	86	0	1:849	1:283	3e-109	386
OKIT_1804	orf01980_AWRIB616_contig1_group1_1762359_1761457_len=903	fig|336988.4.peg.1810	DNA polymerase III delta prime subunit (EC 2.7.7.7);Ontology_term=KEGG_ENZYME:2.7.7.7			1762359	1761457	903	YP_810932.1	DNA polymerase III, delta prime subunit	53.74	294	136	0	19:900	7:300	2e-85	307
OKIT_1805	orf01981_AWRIB616_contig1_group1_1762685_1762359_len=327	fig|336988.4.peg.1811	protein from nitrogen regulatory protein P-II (GLNB) family2C ortholog YAAQ B. subtilis			1762685	1762359	327	YP_810933.1	hypothetical protein	91.67	108	9	0	1:324	1:108	3e-52	195
OKIT_1806	orf01982_AWRIB616_contig1_group1_1763323_1762682_len=642	fig|336988.4.peg.1812	Thymidylate kinase (EC 2.7.4.9);Ontology_term=KEGG_ENZYME:2.7.4.9			1763323	1762682	642	YP_810934.1	thymidylate kinase	71.83	213	60	0	1:639	1:213	2e-83	300
OKIT_1807	orf01983_AWRIB616_contig1_group1_1763547_1763320_len=228	fig|336988.4.peg.1813	FIG015094: hypothetical protein			1763547	1763320	228	YP_810935.1	hypothetical protein	82.67	75	13	0	1:225	1:75	8e-34	133
OKIT_1808	orf01985_AWRIB616_contig1_group1_1764149_1763544_len=606	fig|336988.4.peg.1814	Recombination protein RecR			1764149	1763544	606	YP_810936.1	recombinational DNA repair protein (RecF	87.06	201	26	0	1:603	1:201	4e-100	355
OKIT_1809	orf01986_AWRIB616_contig1_group1_1765976_1764153_len=1824	fig|336988.4.peg.1815	DNA polymerase III subunits gamma and tau (EC 2.7.7.7);Ontology_term=KEGG_ENZYME:2.7.7.7			1765976	1764153	1824	YP_810937.1	DNA polymerase III, gamma/tau subunit	64.94	619	177	7	1:1818	1:592	0.0	736
OKIT_1810	orf01988_AWRIB616_contig1_group1_1768501_1766111_len=2391	fig|336988.4.peg.1816	Xaa-Pro dipeptidyl-peptidase (EC 3.4.14.11);Ontology_term=KEGG_ENZYME:3.4.14.11			1768501	1766111	2391	YP_810938.1	x-prolyl-dipeptidyl aminopeptidase	59.07	794	325	0	1:2382	1:794	0.0	984
OKIT_1811	orf01989_AWRIB616_contig1_group1_1771329_1768579_len=2751	fig|336988.4.peg.1817	cation-transporting ATPase2C E1-E2 family			1771329	1768579	2751	YP_810939.1	cation transport ATPase	79.17	912	190	0	1:2736	1:912	0.0	1445
OKIT_1812	orf01990_AWRIB616_contig1_group1_1771931_1771464_len=468	fig|336988.4.peg.1818	tRNA-specific adenosine-34 deaminase (EC 3.5.4.-);Ontology_term=KEGG_ENZYME:3.5.4.-			1771931	1771464	468	YP_810940.1	tRNA-adenosine deaminase	71.61	155	44	0	1:465	1:155	6e-62	228
OKIT_1813	orf01991_AWRIB616_contig1_group1_1772520_1771906_len=615	fig|336988.4.peg.1819	Ribosomal RNA small subunit methyltransferase C (EC 2.1.1.52);Ontology_term=KEGG_ENZYME:2.1.1.52			1772520	1771906	615	YP_810941.1	16S RNA G1207 methylase RsmC	61.69	201	77	0	1:603	1:201	4e-70	256
OKIT_1814	orf01993_AWRIB616_contig1_group1_1773070_1772705_len=366	fig|336988.4.peg.1820	LSU ribosomal protein L7/L12 (P1/P2)			1773070	1772705	366	YP_810942.1	50S ribosomal protein L12P	91.74	121	10	0	1:363	1:121	2e-56	209
OKIT_1815	orf01995_AWRIB616_contig1_group1_1773683_1773174_len=510	fig|336988.4.peg.1821	LSU ribosomal protein L10p (P0)			1773683	1773174	510	YP_810943.1	50S ribosomal protein L10P	92.31	169	13	0	1:507	1:169	2e-82	296
OKIT_1816	orf01996_AWRIB616_contig1_group1_1774557_1773865_len=693	fig|336988.4.peg.1822	LSU ribosomal protein L1p (L10Ae)			1774557	1773865	693	YP_810944.1	50S ribosomal protein L1P	84.78	230	35	0	1:690	1:230	2e-112	397
OKIT_1817	orf01999_AWRIB616_contig1_group1_1775147_1774557_len=591	fig|336988.4.peg.1823	LSU ribosomal protein L11p (L12e)			1775147	1774557	591	YP_810945.1	50S ribosomal protein L11P	88.78	196	22	0	1:588	1:196	4e-96	342
OKIT_1818	orf02000_AWRIB616_contig1_group1_1776765_1775266_len=1500	fig|336988.4.peg.1824	Gluconate permease2C Bsu4004 homolog			1776765	1775266	1500	YP_810946.1	H+/gluconate symporter or related permease	90.58	499	47	0	1:1497	1:499	0.0	875
[truncated: 66 more rows]
